# Supplementary material for: SIRT5 Is a Druggable Metabolic Vulnerability in Acute Myeloid Leukemia
Source: Oxford University Press journal article supplement (doi:10.1158/2643-3230.bcd-20-0168), 2021-04-10
Supplement: 26433230bcd200168-sup-251721_2_supp_6933106_q6shq2.xlsx [file 26433230bcd200168-sup-251721_2_supp_6933106_q6shq2.xlsx]

## Sheet: Table S8
Table S8. Plasmids.
Name	Source	Reference
pMMP-luc-hygro	Gift from Dr. Nick Trede, HCI	Ridges, S. et al. Blood. 2011;119, 5621-5631.
SIRT5 CRISPR/Cas 9 KO plasmid	Santa Cruz Biotechnology, Inc	Catalog number: sc-416994
pMSCV-AML1-ETO9a/NRASG12D-GFP	Gift from Dr. Anupriya Agarwal, OHSU	Carey A, et al. Cell Rep. 2017;18(13):3204-3218.
MSCV-FLT3-ITD-IRES-GFP	Gift from Dr. Michael C. Heinrich, OHSU	Yee KW, et al. Blood 2004;104:4202–9.
MSCV-BCR-ABL1-IRES-GFP	Made in Deininger lab	Agarwal A, et al. Blood. 2014;124(22):3260-73.
MSCV-MPL-W515L-IRES-GFP	Gift from Dr. Ross Levine, MSKCC	Pikman Y, et al. PLoS Med. 2006;3(7):e270.
MSCV-MLL-AF9-IRES-GFP	Gift from Dr. Dean Tantin, HCI	Jafek JL, et al. Exp Hematol . 2019 Aug;76:38-48.e2.
pRSIT17-U6Tet-sh-CMV-TetRep-2A-TagGFP2-2A-Puro	Cellecta	shSIRT5 (2311, 2312)
pRSIT16-U6Tet-sh-CMV-TetRep-2A-TagRFP-2A-Puro	Cellecta	shSIRT5 (2311, 2312, 3'UTR, 546)
pCDH SIRT5 isoform 1	Made in Deininger lab
pCDH EF1a-SOD2-T2A-Puro	Made in Deininger lab
pRSIT16-U6Tet-shSOD2-CMV-TetRep-2A-TagRFP-2A-Puro	Cellecta
pLKO shSIRT5 546	Gift from Dr. David Lombard, U of Michigan
