# Supplementary material for: SIRT5 Is a Druggable Metabolic Vulnerability in Acute Myeloid Leukemia
Source: Oxford University Press journal article supplement (doi:10.1158/2643-3230.bcd-20-0168), 2021-04-10
Supplement: 26433230bcd200168-sup-251721_2_supp_6933107_qdshq2.xlsx [file 26433230bcd200168-sup-251721_2_supp_6933107_qdshq2.xlsx]

## Sheet: Table S1
Table S1. Patient sample information.
Experiment Type	Sample Count	Sample ID	CD34+ %	Colony counts		Colony reduction (% control)	SIRT5 KD by qPCR (% control)	Gender	Age at diagnosis (years)	Diagnosis (FAB type)	Diagnosis (WHO)	Newly diagnosed/ Relapsed/Refractory	Status	Significant medical history	Date of diagnosis	Date of relapse	Date of sample collection	CBC Parameters at the time of sample collection									Bone marrow blasts (%)	Karyotype at diagnosis	FISH at diagnosis	NGS (Myeloid malignancies panel, ARUP)
				shSIRT5 (-) Dox	shSIRT5 (+) Dox													Hb (g/dL)	WBC (x109/L)	Platelets (x109/L)	Peripheral blood blasts (%)	Neutrophils (%)	Lymphocytes (%)	Monocytes (%)	Eosinophils (%)	Basophils (%)				Genes	Nuc. change	Protein change	VAF (%)	Accession number	ELN Risk group
Samples used in shRNA library screen	1	12-094	ND	NA	NA	NA	NA	Male	73	Therapy-related AML	Therapy-related myeloid neoplasms	Relapsed	NA	Colon cancer, treated with chemotherapy	2011	2012	2012	8.7	3.17	81	0.12	0.19	0.65	0.03	0.01	0	0.2	47,XY,del(5)(q13q33),+8,del(8)(p21),i(8)(q10),-16,+mar[2]/ 46-47,sl,del(7)(q22q35)[cp14]/46,XY[4]	NA	STAG2	c.894-1G>A	NA	0.535544	NM_001042749.2.1	Adverse
																														TP53	c.844C>G	p.Arg282Gly	0.507602	NM_000546.5.1
	2	12-130	0.95	NA	NA	NA	NA	Female	70	AML, transformed from MF	AML, NOS	Newly diagnosed	NA	Myelofibrosis	NA	NA	2012	NA	NA	NA	NA	NA	NA	NA	NA	NA	NA	NA	NA	No variants detected					NA
	3	13-137	ND	NA	NA	NA	NA	Female	33	AML	AML, NOS	Newly diagnosed	Deceased	NA	2013	NA	2013	9.9	81.1	30	0.71	0.05	0.17	0.05	0	0	0.708	46,XX[7]	NA	DNMT3A	c.2645G>A	p.Arg882His	0.469043	NM_022552.4.1
																														FLT3	c.1837+5delGins>MEDNTA:PAD<	NA	0.189094	NM_004119.2.1	Intermediate
																														NPM1	c.860_863dupTCTG	p.Trp288fs	0.381515	NM_002520.6.1
																														TET2	c.1574T>C	p.Leu525Pro	0.45801	NM_001127208.2.1
	4	12-153	ND	NA	NA	NA	NA	Female	85	AML, transformed from CMML	AML, NOS	NA	NA	Chronic myelomonocytic leukemia	2007	NA	2012	12.2	1.46	152	0	0.2	0.6	0.08	0.08	0.01	0.01	46,XX[18]	Normal	TET2	c.4223A>G	p.Asn1408Ser	0.18	NM_001127208.2.1	Intermediate
																														TET2	c.4727_4728delAG	p.Glu1576fs	0.16	NM_001127208.2.1
																														CBL	c.710C>T	p.Ser237Leu	0.06	NM_005188.3.1
																														CBL	c.2170C>T	p.Gln724*	0.16	NM_005188.3.1
																														RUNX1	c.292delC	p.Leu98fs	0.09	NM_001754.4.1
																														PHF6	c.850T>C	p.Cys284Arg	0.13	NM_001015877.1.1
	5	12-174	0.9	NA	NA	NA	NA	Male	61	AML	AML, NOS	Newly diagnosed	Deceased	NA	2012	NA	2012	14.8	83.48	72	0.73	0.05	0.21	0	0.01	0	NA	NA	NA	DNMT3A	c.2645G>A	p.Arg882His	0.458003	NM_022552.4.1
																														FLT3	c.1739_1801dupAGGTGACCGGCTCCTCAGATAATGAGTACTTCTACGTTGATTTCAGAGAATATGAATATGATC	p.Gln580_Asp600dup	0.1447	NM_004119.2.1	Intermediate
																														WT1	c.1124_1128dupCCCCG	p.Thr377fs	0.0620251	NM_024426.4.1
																														WT1	c.1142C>A	p.Ser381*	0.256083	NM_024426.4.1
	6	12-206	0.92	NA	NA	NA	NA	Female	46	AML	AML with inv(16)	Newly diagnosed	NA	NA	2012	NA	2012	10.4	199.12	31	0.7	NA	NA	NA	NA	NA	NA	47,XX,inv(16)(p13.1q22),+22[20]	16q22 (CBFB): rearrangement present	No variants detected					Favorable
	7	12-221	ND	NA	NA	NA	NA	Female	59	AML	AML, NOS	Newly diagnosed	Alive	NA	2012	NA	2012	6.9	35	120	NA	0.27	0.32	0.37	0	0	0.34	46,XX[20]	NA	DNMT3A	c.2390A>T	p.Asn797Ile	0.46143	NM_022552.4.1
																														FLT3	c.1769_1770insGGAGGTGTGGGACTT	p.Tyr589_Phe590insLeuGluValTrpAsp	0.0307114	NM_004119.2.1
																														NPM1	c.860_863dupTCTG	p.Trp288fs	0.383318	NM_002520.6.1
																														PTPN11	c.179G>C	p.Gly60Ala	0.399971	NM_002834.3.1
																														WT1	c.1098+1G>A	NA	0.43654	NM_024426.4.1
	8	12-318	0.9	NA	NA	NA	NA	Male	41	AML, M1	AML, NOS	Newly diagnosed	Deceased	NA	2012	NA	2012	10.8	143	47	0.95	0.02	0.03	0	0	0	0.968	46,XY[7]	Normal	NPM1	c.860_863dupTCTG	p.Trp288fs	0.390498	NM_002520.6.1	Favorable
																														TET2	c.1355delA	p.Glu452fs	0.446225	NM_001127208.2.1
																														TET2	c.4021_4025delGCACC	p.Ala1341fs	0.453591	NM_001127208.2.1
	9	12-322	0.92	NA	NA	NA	NA	Male	19	AML	AML, NOS	Newly diagnosed	NA	NA	2012	NA	2012	9.8	150.9	19	0.91	0.01	0.08	0	0	0	0.9	46,XY[20]	Normal	CEBPA	c.1041_1064dupGAAGGTGCTGGAGCTGACCAGTGA	p.Ser354_Asp355insGluLysValLeuGluLeuThrSer	0.301448	NM_001287424.1.1	Favorable
																														CEBPA	c.372dupG	p.Lys125fs	0.426681	NM_001287424.1.1
																														FLT3	c.1773_1805dupCGTTGATTTCAGAGAATATGAATATGATCTCAA	p.Leu601_Lys602insAsnValAspPheArgGluTyrGluTyrAspLeu	0.0972312	NM_004119.2.1
																														NRAS	c.182A>G	p.Gln61Arg	0.0333028	NM_002524.4.1
	10	12-327	0.93	NA	NA	NA	NA	Male	24	AML	AML, NOS	Newly diagnosed	Alive	NA	2012	NA	2012	9.3	42.52	195	0.96	0.01	0.02	0.01	0	0	0.92	47,XY,+21[7]/51,sl,+Y,+10,+15,+18[6]/46,XY[7]	21q22 (RUNX1): gain present	CEBPA	c.1051_1053dupGAG	p.Glu351dup	0.422013	NM_001287424.1.1	Adverse
																														CEBPA	c.994C>T	p.Arg332Cys	0.477516	NM_001287424.1.1
	11	13-100	0.83	NA	NA	NA	NA	Female	31	AML	AML with inv(16)	Newly diagnosed	Alive	NA	2013	NA	2013	9	123	46	0.86	0.02	0.05	0.07	0	0	0.517	46,XX,inv(16)(p13.1q22)[8]/46,XX[12]	NA	CBL	c.1268_1429del	p.Ile423_Ala476del	0.384056	NM_005188.3.1	Favorable
																														KIT	c.1250_1255delCTTACG	p.Thr417_Asp419delinsAsn	0.0235473	NM_000222.2.1
	12	12-377	0.83	NA	NA	NA	NA	Male	60	AML, M1	AML, NOS	Newly diagnosed	Deceased	NA	2012	2013	2012	10.8	73.21	45	0.81	0.04	0.08	0.06	0	0	0.555	47,XY,+21[2]/46,XY[19]	Normal	FLT3	c.1837+1_1837+2insAGATTTCAGAGAATATGAATATGATCTCAAATGGGAGTTTCCAAGAGAAAATTTAGAGTTTGG	NA	0.205342	NM_004119.2.1	Intermediate
																														NPM1	c.860_863dupTCTG	p.Trp288fs	0.384483	NM_002520.6.1
																														TET2	c.4757C>G	p.Ser1586*	0.474285	NM_001127208.2.1
																														TET2	c.665_666delAT	p.His222fs	0.475552	NM_001127208.2.1
Experiment Type	Sample Count	Sample ID		Colony counts		%Colony reduction (vs no dox)	%SIRT5 KD by qPCR (vs no dox)	Gender	Age at diagnosis (years)	Diagnosis (FAB type)	Diagnosis (WHO)	Newly diagnosed/ Relapsed/Refractory	Status	Significant medical history	Date of diagnosis	Date of relapse	Date of sample collection	CBC Parameters at the time of sample collection									Bone marrow myeloblasts (%)	Karyotype at diagnosis	FISH at diagnosis	NGS (Myeloid malignancies panel, ARUP)
				shSIRT5 (-) Dox	shSIRT5 (+) Dox													Hb (g/dL)	WBC (x109/L)	Platelets (x109/L)	Peripheral blood blasts (%)	Neutrophils (%)	Lymphocytes (%)	Monocytes (%)	Eosinophils (%)	Basophils (%)				Genes	Nuc. change	Protein change	VAF (%)	Accession number	ELN Risk group
Samples used in SIRT5 knockdown experiments and colony forming assays	13	16-047		15	4.5	70	64.1	Male	35	AML-M3 (APL)	APL with PML-RARA	Newly diagnosed	Alive	NA	2016	NA	2016	9.4	55.42	47	0.95	0.02	0.04	0.01	0	0	0.918	46,XY,t(15;17)(q24;q21)[18]/46,XY[2]	t(15;17) present	FLT3-ITD	c.1780_1800dup	p.Phe594_Asp600dup	0.17	NM_004119.2
																														CEBPA	c.935A>G	p.Gln312Arg	0.45	NM_004364.4
	14	16-226		25	14.5	42	61.9	Female	61	AML	AML, NOS	Newly diagnosed	Deceased	NA	2016	NA	2016	7.3	8.38	583	0.32	0.39	0.19	0.04	0.02	0	0.204	46,XX[20]	Normal	DNMT3A	c.2645G>A	p.Arg882His	0.439	NM_175629.2	Intermediate
																														WT1	c.1142C>A	p.Ser381*	0.364	NM_024426.4
																														WT1	c.1140dup	p.Ser381fs	0.04	NM_024426.4
																														CEBPA	c.68dup	p.His24fs	0.21	NM_004364.4
																														NRAS	c.35G>A	p.Gly12Asp	0.302	NM_002524.4
	15*	16-237		49.5	34	31.3131	29.6	Female	38	Therapy-related MDS	Therapy-related myeloid neoplasms	Refractory	Deceased	leiomyosarcoma - status post surgery, radio- and chemotherapy	2014	NA	2016	8.3	44.5	93	0.03	0.12	0.01	0	0	0	NA	46,XX,add(7)(q21)[20].arr[hg19]3q26.2q29(168,782,753-197,851,986)x3,	deletion 7q31 in 178/200 (89.0 percent) cells scored	WT1	c.1096C>T	p.Gln366*	0.396	NM_024426.4	Adverse
	same patient as 16-262									with transformation into AML																		7q21.2q36.3(92,388,458-159,119,707)x1		CSF3R	c.2337T>A	p.Tyr779*	0.418	NM_156039.3
	16*	16-262		23.5	10.5	55.3191	83	Female	38	Therapy-related MDS	Therapy-related myeloid neoplasms	Refractory	Deceased	leiomyosarcoma - status post surgery, radio- and chemotherapy	2014	NA	2016	9.4	54.55	103	0.06	0.18	0.09	0.1	0	0	NA	46,XX,add(7)(q21)[20].arr[hg19]3q26.2q29(168,782,753-197,851,986)x3,	deletion 7q31 in 178/200 (89.0 percent) cells scored	WT1	c.1096C>T	p.Gln366*	0.396	NM_024426.4	Adverse
	same patient as 16-237									with transformation into AML																		7q21.2q36.3(92,388,458-159,119,707)x1		CSF3R	c.2337T>A	p.Tyr779*	0.418	NM_156039.3
	17	16-244		55.5	43	22.5225	70.6	Male	58	AML-M4	AML with myelodysplasia-related changes	Newly diagnosed	Alive	NA	2016	NA	2016	6.9	1.69	45	0.1	0.09	0.53	0.15	0	0	0.289	45-46,XY,add(2)(p11.2), add(3)(p12),-5,-7,add(7)(p11.2),-17,+2-3mar[18]	deletion 5q31 involving the EGR1 locus in 152/200 (76%) cells	TP53	c.584T>C	p.Ile195Thr	0.391	NM_000546.5	Adverse
																												/46,XY[2]	monosomy 7 in 133/200 (66.5%) cells
	18	16-373		152	70	53.9474	42	Female	54	AML, transformed from MPN	AML, NOS	Newly diagnosed	Deceased	MPN	2016	NA	2016	7.6	76.34	20	0.88	0.03	0.09	0.01	0	0	NA	NA	NA	JAK2	c.1849G>T	p.Val617Phe	0.832	NM_004972.3	?
																														DNMT3A	c.2645G>A	p.Arg882His	0.352	NM_175629.2
	19	16-446		55.5	14.5	73.8739	61.9	Male	58	MDS	MDS-MLD	Newly diagnosed	Alive	NA	2016	NA	2016	7.6	4.67	22	NA	NA	NA	NA	NA	NA	0.029	41-44, XY,-3,-5,del(5) (q12q33),-6,-7,-8,-9,-11,-12,-13,	5q31 deletion, 7cen,7q31 deletion/monosomy, 11q23 deletion	TP53	c.844del.	p.Arg282fs	0.323	NM_000546.5	Adverse
																												-18,-21,-22,+2-8mar[cp23]/46,XY[1]		TP53	c.216_217insT	p.Val73fs	0.273	NM_000546.5
	20	16-085		25.5	14	45.098	failed	Male	66	AML	AML, NOS	Newly diagnosed	Alive	NA	2016	NA	2016	9.1	16.24	27	0.56	0.12	0.16	0.01	0	0.02	0.715	46,XY[20]	Normal	NPM1	c.860_863dup	p.Trp288fs	0.164	NM_002520.6	Favorable
																														TET2	c.5338del	p.Leu1780fs	0.463	NM_001127208.2
																														TET2	c.3242dup	p.Leu1081fs	0.423	NM_001127208.2
																														ZRSR2	c.376C>T	p.Arg126*	0.977	NM_005089.3
																														DNMT1	c.406C>T	p.Arg136Cys	0.512	NM_001130823.1
	21	16-267		123	97	21.1382	101	Female	66	AML	AML, NOS	Newly diagnosed	NA	NA	2016	NA	2016	9.6	129.51	19	0.74	0.08	0.14	0.01	0	0	NA	47,XX,+8[18] (peripheral blood)	Normal	FLT3-ITD	c.1773_1774ins48	p.Tyr591_Val592ins16	0.1	NM_004119.2	Intermediate
																														WT1	c.1129_1135dup	p.Val379fs	0.13	NM_024426.4
																														ZRSR2	c.1243C>T	p.Arg415Trp	0.489	NM_005089.3
	22	16-395		9	5	44.4444	36.2	Female	64	AML, transformed from MPN	AML, NOS	Newly diagnosed	Alive	Essential thrombocythemia	2016	NA	2016	7.7	36.54	40	0.78	0.02	0.11	0.06	0	0	0.594	47,XX,+X,inv(3)(q21q26.2),-7,+22[2]/48,sl,+21[18]	monosomy 7 present in 191/200 (95.5%)	CALR	c.1099_1150del	p.Leu367fs	0.24	NM_004343.3	Adverse
																														RUNX1	c.593A>G	p.Asp198Gly	0.637	NM_001754.4
																														PTPN11	c.178G>A	p.Gly60Ser	0.491	NM_002834.3
																														CBL	c.1227+2_1227+5delinsATACC	p.?	0.165	NM_005188.3
																														FLT3	c.1736T>C	p.Val579Ala	0.023	NM_004119.2
																														DNMT3A	c.1711G>C	p.Ala571Pro	0.515	NM_175629.2
																														EZH2	c.1906C>G	p.Pro636Ala	0.947	NM_004456.4
	23	16-434		8	3.5	56.25	89.6	Male	68	AML	AML with myelodysplasia-related changes	Newly diagnosed	NA	NA	2016	NA	2016	7.7	5.23	61	0.74	0.04	0.1	0.02	0	0	0.67	45,XY,+1,der(1;14)(p10;q10),add(3)(p25),-5,del(12)(p11.2p13)[6]/	5p15.2 (D5S23): gain present	TP53	c.714dup	p.Asn239*	0.584	NM_000546.5	Adverse
																												44,XY,sl,del(7)(q11.2),der(8)del(8)(p21)t(8;17)(q24;q21),-17,+19,-22[cp10]/	5q31 (EGR1): deletion present	TP53	c.496_501del	p.Ser166_Gln167del	0.12	NM_000546.5
																												63<3n>,sdl1,-3,-4,-6,+8,del(8)(p21)x2,+9,+13,-15,-18,-21[cp4]	7cen (D7Z1), 7q31 (D7S486): deletion and monosomy present
																													t(8;21)(q22;q22) (RUNX1T1;RUNX1): translocation present
																													11q23 (KMT2A; also known as MLL): gain present
																													16q22 (CBFB): gain present
	24	16-491		85	60	29.4118	68.3	Male	61	AML	AML, NOS	Newly diagnosed	Alive	NA	2016	NA	2016	6.3	115.15	57	0.89	0.04	0.06	0.01	0	0	0.86	46,XY[20]	Normal	FLT3-ITD	c.1780_1800dup	p.Phe594_Asp600dup	0.45	NM_004119.2	Intermediate
																														NPM1	c.860_863dup	p.Trp288fs	0.207	NM_002520.6
																														DNMT3A	c.976C>T	p.Arg326Cys	0.445	NM_175629.2
																														TET2	c.2730del	p.Ala911fs	0.406	NM_001127208.2
																														TET2	c.3105dup	p.His1036fs	0.394	NM_001127208.2
	25	16-539		62	44.5	28.2258	failed	Male	63	AML	AML with myelodysplasia-related changes	Newly diagnosed	Alive	Rheumatoid arthritis	2016	NA	2016	9.4	8.7	67	0.07	0.42	0.32	0.13	0.02	0	0.263	46,XY[11]	Normal	DNMT3A	c.2504C>T	p.Thr835Met	0.47	NM_175629.2	Intermediate
																														BCOR	c.1062C>A	p.Tyr354*	0.722	NM_001123385.1
																														IDH1	c.394C>T	p.Arg132Cys	0.029	NM_005896.3
																														DNMT3A	c.2264T>C	p.Phe755Ser	0.386	NM_175629.2
	26	17-018		21.5	14.5	32.5581	failed	Female	38	AML	AML, NOS	Newly diagnosed	Alive	NA	2017	NA	2017	7.4	107	54	0.8	0.07	0.04	0.09	0	0	0.7	46,XX[20]	Normal	FLT3-ITD	c.1742_1786dup	p.Val581_Arg595dup	0.22	NM_004119.2
																														NPM1	c.860_863dup	p.Trp288fs	0.212	NM_002520.6
																														DNMT3A	c.2645G>A	p.Arg882His	0.418	NM_175629.2
																														FLT3	c.1715A>G	p.Tyr572Cys	0.012	NM_004119.2
	27	17-022		20.5	16	21.9512	29.7	Male	73	AML	AML, NOS	Newly diagnosed	Alive	NA	2017	NA	2017	7.9	19.8	40	0.81	0.04	0.11	0	0.01	0.01	0.9	46,XY[20]	Normal	NPM1	c.860_863dup	p.Trp288fs	0.238	NM_002520.6	Favorable
																														EZH2	c.394C>G	p.Pro132Ala	0.417	NM_004456.4
																														CSF3R	c.2509G>A	p.Asp837Asn	0.475	NM_156039.3
	28	17-268		160	96.5	39.6875	24.7	Female	81	AML	AML, NOS	Newly diagnosed	Alive	Myeloproliferative neoplasm with fibrosis	2017	NA	2017	9.3	69.42	33	0.36	0.28	0.2	0.05	0.01	0	0.348	46,XX,add(11)(q23)[1]/47,sl,+21[19]	N/A	JAK2	c.1849G>T	p.Val617Phe	0.962	NM_004972.3	Intermediate
																														RUNX1	c.592G>A	p.Asp198Asn	0.549	NM_001754.4
																														SRSF2	c.284C>G	p.Pro95Arg	0.457	NM_003016.4
																														NRAS	c.34G>A	p.Gly12Ser	0.457	NM_002524.4
																														TET2	c.4664_4665del	p.Glu1555fs	0.305	NM_001127208.2
																														TET2	c.3860T>C	p.Phe1287Ser	0.445	NM_001127208.2
	29	17-318*		56	34	39.2857	NA	Male	32	AML	AML, NOS	Newly diagnosed	Deceased	NA	2017	NA	2017	9.7	5.01	63	0.31	0.14	0.42	0.02	0.02	0	0.692	46,XY[20]	Normal	FLT3-ITD	c.1794_1795ins27	p.Glu598_Tyr599ins9	NR	NM_004119.2	Intermediate
	same patient as 17-327																													FLT3-ITD	c.1759_1815dup	p.Asn587_Phe605dup	NR	NM_004119.2
																														WT1	c.1108_1109insT	p.Arg370fs	0.407	NM_024426.4
																														BCOR	c.4876C>T	p.Gln1626*	0.953	NM_001123385.1
	30	17-098		12.5	7	44	NA	Male	66	AML	AML, NOS	Newly diagnosed	Deceased	NA	2017	NA	2017	6.9	35.04	82	0.2	0.02	0.32	0.43	0	0	0.35	46,XY[15]	Normal	RUNX1	c.593A>G	p.Asp198Gly	0.903	NM_001754.4	Intermediate
																														SRSF2	c.284C>A	p.Pro95His	0.442	NM_003016.4
																														ASXL1	c.1934dup	p.Gly646fs	0.355	NM_015338.5
																														NRAS	c.38G>A	p.Gly13Asp	0.307	NM_002524.4
																														PTPN11	c.179G>T	p.Gly60Val	0.012	NM_002834.3
	31	17-212		15	9.5	36.7	NA	Male	57	AML	AML, NOS	Newly diagnosed	Deceased	atypical CML	2017	NA	2017	12.4	49.09	64	0.31	0.2	0.16	0.12	0.04	0.07	0.25	46,XY,i(17)(q10)[8]/47,sl,+13[2]/46,XY[10]	Normal	SETBP1	c.2602G>A	p.Asp868Asn	0.379	NM_015559.2	Adverse
																														ASXL1	c.1900_1922del	p.Glu635fs	0.14	NM_015338.5
																														SRSF2	c.284C>A	p.Pro95His	0.533	NM_003016.4
																														NRAS	c.35G>A	p.Gly12Asp	0.421	NM_002524.4
	32	17-218		60	51	15	NA	Female	58	AML	AML NOS	Newly diagnosed	Deceased	cervical cancer with chemoradiation	2017	NA	2017	11.1	6.28	196	0	0.69	0.13	0.08	0	0.04	0.013	46,XX[20]	Normal	NPM1	c.860_863dup	p.Trp288fs	0.191	NM_002520.6	Favorable
																														PTPN11	c.215C>T	p.Ala72Val	0.105	NM_002834.3
	33	17-243		22.5	19	15.6	NA	Male	63	NA	Mixed phenotype acute leukemia; T/myeloid	Newly diagnosed	Alive	NA	2017	NA	2017	9.1	6.41	52	0.46	0.03	0.43	0.05	0.01	0	0.95	46,XY[20]	Normal	DNMT3A	c.2206C>T	p.Arg736Cys	0.439	NM_175629.2	Intermediate
																														DNMT3A	c.1755dup	p.Cys586fs	0.365	NM_175629.2
																														IDH1	c.394C>T	p.Arg132Cys	0.44	NM_005896.3
																														CBL	c.1227+2T>C	p.?	0.516	NM_005188.3
	34	17-319		22	15.5	29.5	NA	Male	75	AML	AML, NOS	Newly diagnosed	Deceased	NA	2017	NA	2017	6.9	1.71	28	0.08	0.58	0.26	0.02	0	0	0.204	46,XY,add(5)(q11.2)[2]	5q31 (EGR1): deletion present	TP53	c.445del	p.Ser149fs	0.503	NM_000546.5	Adverse
	also used in immunoblots																											/45,sl,der(7;14)(q10;10),+0-2mar[cp5]	8q22 (RUNX1T1): deletion present	TP53	c.656_657delinsG	p.Pro219fs	0.076	NM_000546.5
																												/46,XY[3]	8q22 (RUNX1T1): gain present	U2AF1	c.470A>C	p.Gln157Pro	0.353	NM_006758.2
	35	17-327*		102.5	56	45.4	NA	Male	32	AML	AML, NOS	Newly diagnosed	Deceased	NA	2017	NA	2017	9.5	14.6	54	0.53	0.06	0.32	0.03	0.01	0	0.69	46,XY[20]	Normal	FLT3-ITD	c.1794_1795ins27	p.Glu598_Tyr599ins9	NR	NM_004119.2	Intermediate
	same patient as 17-318																													FLT3-ITD	c.1759_1815dup	p.Asn587_Phe605dup	NR	NM_004119.2
																														WT1	c.1108_1109insT	p.Arg370fs	0.407	NM_024426.4
																														BCOR	c.4876C>T	p.Gln1626*	0.953	NM_001123385.1
	36	17-355		154	85	44.8	NA	Male	47	Therapy related AML	Therapy-related AML	Relapsed	Deceased	Hx of nodular lymphocyte predominant Hodgkin lymphoma status post radiation and chemotherapy with apparent recurrences with subsequent chemo and autoSCT	2017	NA	2017	7.4	7.45	19	0.1	0.5	0.16	0.03	0.16	0.02	0.27	43-46,XY,add(4)(p14),-5, add(6)(p23),-7,der(12)t(12;18)(p11.2;q11.2),-18, +1-3mar[cp17]/43-45,sl,+22[cp3]	5q31 (EGR1): deletion present 7cen (D7Z1), 7q31 (D7S486): deletion present 16q22 (CBFB): low level gain present	TP53	c.913A>T	p.Lys305*	0.492	NM_000546.5	Adverse
																														TP53	c.746G>C	p.Arg249Thr	0.426	NM_000546.5
																														IDH1	c.394C>T	p.Arg132Cys	0.066	NM_005896.3
	37	19-463		78	60	23	NA	Male	72	AML	transformed from CMML-0, Vidaza	Newly diagnosed	Alive	Hx of localized bladder cancer T1a, s/p resection	2019	NA	2019	14.8	187.44	87	0.75	10	5	6	1	0	0.8	46,XY,add(1)(q32),add(14)(p11.2)[9]/46,XY[11]	Normal	RUNXI	c.351+2T>C	p.unknown	0.823	NM_001754.4	Adverse
																														ASXL1	c.2893C>T	p.Arg965*	0.478	NM_015338.5
																														FLT3	c.2503G>C	p.Asp835His	0.933	NM_004119.2
																														SRSF2	c.284C>A	p.Pro95His	0.472	NM_003016.4
																														EZH2	c.1411-3delinsTAGGTGTA	p.unknown	0.395	NM_004456.4
																														TET2	c.832_833del	p.Gln278fs	0.469	NM_001127208.2
																														SETBP1	c.2612T>C	p.Ile871Thr	0.028	NM_015559.2
																														BCOR	c.4912G>T	p.Glu1638*	0.423	NM_001123385.1
																														BCORL1	c.701C>G	p.Ser234*	0.265	NM_021946.4
																														BCORL1	c.3506C>G	p.Ser1169*	0.054	NM_021946.4
																														BCORL1	c.907del	p.Ala303fs	0.019	NM_021946.4
Experiment Type	Sample Count	Sample ID	These columns intentionally left blank					Gender	Age at diagnosis (years)	Diagnosis (FAB type)	Diagnosis (WHO)	Newly diagnosed/ Relapsed/Refractory	Status	Significant medical history	Date of diagnosis	Date of relapse	Date of sample collection	CBC Parameters at the time of sample collection									Bone marrow myeloblasts (%)	Karyotype at diagnosis	FISH at diagnosis	NGS (Myeloid malignancies panel, ARUP)
																		Hb (g/dL)	WBC (x109/L)	Platelets (x109/L)	Peripheral blood blasts (%)	Neutrophils (%)	Lymphocytes (%)	Monocytes (%)	Eosinophils (%)	Basophils (%)				Genes	Nuc. change	Protein change	VAF (%)	Accession number	ELN Risk group
Samples used in SIRT5 protein expression immunoblots	38	15-250						Female	71	Therapy related AML	Therapy related AML	Newly diagnosed	Deceased	Hx of follicular lymphoma tx chemotherapy	2015	NA	2015	10.4	133	384	0.66	0.06	0.15	0.07	0	0	0.62	46,XX,del(7)(q22q36)[20]	ABNORMAL FISH RESULTS	WT1	c.1138delinsAA	p.Arg380fs	0.312	NM_024426.4	Adverse
	39	16-119																											3q26.2 (MECOM): gain or rearrangement present	FLT3-ITD			0.04	NM_004119.2
	40	16-133																											7cen (D7Z1), 7q31 (D7S486): deletion present
	41	15-443						Male	70	AML, transformed from MPN	AML, NOS	Newly diagnosed	Deceased	Hx JAK2+ myelofibrosis	2015	NA	2015	7.6	8.2	5	0.58	0.15	0.12	0.14	0	0	NA	46,XY,inv(16)(p13.1q22)[9]/46,XY[11]		JAK2	c.1849G>T	p.Val617Phe	0.5	NM_004972.3	Favorable
	42	15-656																												U2AF1	c.470A>C	p.Gln157Pro	0.421	NM_006758.2
																														ASXL1	c.1924_1928del	p.Gly644fs	0.124	NM_015338.5
																														PTPN11	c.205G>A	p.Glu69Lys	0.273	NM_002834.3
	43	15-584						Male	73	Therapy related AML	Therapy related AML	Newly diagnosed	Deceased	Hx NSCLC tx chemotherapy and radiation	2015	NA	2015	8.6	24	48	0.86	0	0.08	0.03	0	0	NA	45,X,-Y[20]	Normal	TET2	c.3803+1G>A	p.?	0.393	NM_001127208.2	Adverse
																														RUNX1	c.319C>G	p.Arg107Gly	0.739	NM_001754.4
																														ASXL1	c.1940dup	p.Gly649fs	0.379	NM_015338.5
																														BCORL1	c.3496dup	p.Ala1166fs	0.075	NM_021946.4
	44	16-099						Male	31	AML M4	AML, NOS	Newly diagnosed	Deceased	NA	2016	NA	2016	7.7	288	55	0.33	0.038	0.038	0.22	0	0	0.38	46,XY[20]	Normal	FLT3-ITD	c.1798_1827dup	p.Asp600_Asn609dup	0.18	NM_004119.2	Intermediate vs adverse
																														WT1	c.1127_1128insAAAAAGGTCC	p.Thr377fs	0.16	NM_024426.4
	45	17-270						Male	67	Therapy related AML	Therapy related AML	Newly diagnosed	Deceased	Hx HL s/p chemotherapy and radiation	2017	NA	2017	7.2	27.1	33	0.74	0.08	0.15	0.02	0	0	0.9	46,XY,t(8;21)(q22;q22)[8]46,sl,del(9)(q13q22)[4]/47,sdl,+21[	t(8;21)(q22;q22) (RUNX1T1;RUNX1): translocation present	KIT	c.2447A>T	p.Asp816Val	0.068	NM_000222.2	Favorable
	46	17-271																										2]/47,sl,+21[4]/46,XY[2]		TET2	c.4417A>T	p.Lys1473*	0.429	NM_001127208.2
																														NRAS	c.35G>A	p.Gly12Asp	0.031	NM_002524.4
																														KRAS	c.436G>A	p.Ala146Thr	0.014	NM_004985.4
	47	16-173						Male	82	AML M1	AML, NOS	Newly diagnosed	Deceased	Hx LGL leukemia	2016	NA	2016	12.1	63.2	65	0.77	0.01	0.07	0.01	0.01	0	0.86	43-45,X,-Y,del(5)(q22q35),del(7)(q22),+8,-9,add(9)(p13),+11,	ABNORMAL FISH RESULTS	TP53	c.673-2A>T	p.?	0.91	NM_000546.5	Adverse
	48	16-174																										-13,-14,add(16)(q24),-17,-18,del(20)(q11.2q13.2),+2-3mar[cp2 1]	5q31 (EGR1): deletion present	KIT	c.2447A>T	p.Asp816Val	0.444	NM_000222.2
																													8q22 (RUNX1T1): gain present
																													11q23 (KMT2A; also known as MLL): gain present
	49	16-512						Female	65	AML, transformed from CMML	AML, NOS	Newly diagnosed	Alive	Hx CMML	2016	NA	2016	6.4	48	109	0.02	0.47	0.1	0.37	0	0	0.2	45,XX,-7[20]	ABNORMAL FISH RESULT	IDH2	c.419G>A	p.Arg140Gln	0.442	NM_002168.3	Adverse
	50	16-513																											7cen (D7Z1), 7q31 (D7S486): monosomy present	DNMT3A	c.691del	p.Gln231fs	0.332	NM_175629.2
																														NRAS	c.181C>G	p.Gln61Glu	0.478	NM_002524.4
	51	16-128						Female	61	AML	AML, NOS	Newly diagnosed	Deceased		2016	NA	2016	8.2	7.49	455	0.25	0.5	0.2	0.02	0.01	0	0.4	46,XX[20]	Normal	DNMT3A	c.2645G>A,	p.Arg882His	0.439	NM_175629.2	Intermediate
																														WT1	c.1142C>A	p.Ser381*	0.364	NM_024426.4
																														WT1	c.1140dup	p.Ser381fs	0.04	NM_024426.4
																														CEBPA	c.68dup	p.His24fs	0.21	NM_004364.4
																														NRAS	c.35G>A	p.Gly12Asp	0.302	NM_002524.4
	52	17-107						Female	31	AML M1	AML, NOS	Newly diagnosed	Alive		2017	NA	2017	7.7	11.23	18	0.69	0.03	0.23	0.04	0	0	0.82	46,XX,del(9)(q13q22)[5]/46,sl,del(11)(q13q23)[14]	NA	CEPBA	c.330dup	p.Ala111fs	0.445	NM_004364.4	Adverse
	53	17-111																										/46,sdl,t(2;4;7)(q33;q21;p15),add(8)(p11.2)[2]		CEPBA	c.956_961del	p.Ser319_Asp320del	0.329	NM_004364.4
																														GATA2	c.989G>A	p.Arg330Gln	0.46	NM_001145661.1
																														CSF3R	c.1853C>T	p.Thr618Ile	0.016	NM_156039.3
	54	17-159						Male	44	AML M4	AML w/ recurrent genetic abnormalities	Newly diagnosed	Alive		2017	NA	2017	8.1	102	23	0.83	0.03	0.08	0.05	0	0	0.75	46,XY,der(7)t(7;11)(q22;q13),	ABNORMAL FISH RESULTS						Intermediate vs adverse
																												inv(16)(p13.1q22)[15]/46,XY[5]	7cen (D7Z1), 7q31 (D7S486): deletion present	KIT	c.1252_1258delinsCGTTGGG	p.Tyr418_Arg420delinsArgTrpGly	0.1	NM_000222.2
																													11q23 (KMT2A; also known as MLL): gain present
																													16q22 (CBFB): rearrangement present
	55	16-227						Male	58	AML	AML, NOS	Newly diagnosed	Deceased		2016	NA	2016	11.4	21.14	333	0.24	0.1	0.55	0.11	0	0	0.45	46,XY[20]	Normal	IDH1	c.394C>T	p.Arg132Cys	0.391	NM_005896.3	Intermediate
																														DNMT3A	c.890G>A	p.Trp297*	0.821	NM_175629.2
	56	16-239						Female	60	Therapy related AML, M4	AML w/ recurrent genetic abnormalities/Therapy related AML	Relapsed	Deceased	Uterine carcinoma with chemotherapy and radiation	2015	2016	2016	7.1	10.93	7	0.52	0.15	0.06	0.08	0.01	0	0.8	46,XX,inv(16)(p13q22)[20]	16q22 (CBFB): rearrangement present	NRAS	c.183A>T	p.Gln61His	0.468	NM_002524.4	Favorable
	57	16-420						Female	55	AML	AML, NOS	Newly diagnosed	Deceased		2016	NA	2016	4.7	21.9	94	0.67	0.05	0.26	0.01	0	0	0.4	46,XX[21]	Normal	NPM1	c.863_864insCCTG	p.Trp288fs	0.096	NM_002520.6	Favorable
																														CEPBA	c.117del	p.Ala40fs	0.203	NM_004364.4
																														CEPBA	c.911A>C	p.Lys304Thr	0.265	NM_004364.4
																														DNMT3A	c.2645G>A	p.Arg882His	0.391	NM_175629.2
																														TET2	c.4501C>T	p.Gln1501*	0.39	NM_001127208.2
	58	16-427						Male	42	AML	AML, NOS	Newly diagnosed	Deceased	Mediastinal myeloid sarcoma	2016	NA	2016	11.6	5.4	125	0.38	0.15	0.41	0.02	0	0	0.8	45,XY,t(3;17)([21;q11.2),add(4)(q21),add(5)(p15),ins(10;11)(	ABNORMAL FISH RESULTS	No variants detected					Adverse
																												p12;q23q13),der(12;18)(q10;q10)[19]/46,XY[1]	11q23 (KMT2A; also known as MLL): rearrangement present
																														SRSF2	c.284C>A	p.Pro95His	0.374	NM_003016.4	Intermediate
	59	16-435						Female	69	AML	AML, NOS	Newly diagnosed	Alive		2016	NA	2016	8.9	9.02	25	0.04	0.66	0.11	0.15	0	0	NA	karyotype is unknown due to lack of cell growth	Normal	CSF3R	c.1853C>T	p.Thr618Ile	0.307	NM_156039.3
																														IDH2	c.419G>A	p.Arg140Gln	0.418	NM_002168.3
	60	17-173						Female	67	AML	AML with myelodysplasia related changes	Newly diagnosed	Deceased		2017	NA	2017	7	4.52	40	0.68	0.01	0.26	0	0.04	0	0.87	46,X,t(X;1;21)(q13;p32;q22),inv(3)(q21q26),der(5)t(5;6)(q31;	ABNORMAL FISH RESULTS	TP53	c.375G>A	p.Thr125Thr	0.496	NM_000546.5	Adverse
																												p21),del(6)(p21),del(7)(q22q36)[20]	3q21.3q26.2 (RPN1/MECOM): translocation or inversion present	TP53	c.415A>G	p.Lys139Glu	0.444	NM_000546.5
																													7cen (D7Z1), 7q31 (D7S486): deletion present	IDH1	c.394C>T	p.Arg132Cys	0.369	NM_005896.3
																														PTPN11	c.182A>C	p.Asp61Ala	0.011	NM_002834.3
	61	17-285						Female	82	AML	AML transformed from MF; AML with recurrent genetic abnormalities	Newly diagnosed	Deceased	Hx JAK2+ myelofibrosis	2017	NA	2017	8.7	32.8	7	0.32	0.24	0.07	0.22	0	0	NA	46,XX,add(11)(q23)[1]/47,sl,+21[19]	NA	JAK2	c.1849G>T	p.Val617Phe	0.962	NM_004972.3	Adverse
																														RUNX1	c.592G>A	p.Asp198Asn	0.549	NM_001754.4
																														SRSF2	c.284C>G	p.Pro95Arg	0.457	NM_003016.4
																														NRAS	c.34G>A	p.Gly12Ser	0.457	NM_002524.4
																														TET2	c.4664_4665del	p.Glu1555fs	0.305	NM_001127208.2
																														TET2	c.3860T>C	p.Phe1287Ser	0.445	NM_001127208.2
	62	17-096						Male	66	AML	AML with myelodysplasia related changes, transformed from CMML	Relapsed	Unknown	Hx CMML	2015	2017	2017	12.4	11.98	59	0	0.36	0.37	0.23	0	0.002	0.17	46,XY[20]	Normal	IDH2	c.419G>A	p.Arg140Gln	0.444	NM_002168.3	Adverse
																														SRSF2	c.284_307del	p.Pro95_Arg102del	0.23	NM_003016.4
																														RUNX1	c.1247_1250dup	p.Met418fs	0.168	NM_001754.4
																														RUNX1	c.710G>A	p.Arg237Lys	0.448	NM_001754.4
	63	19-348						Male	82	AML	AML transformed from MF	Newly diagnosed	Deceased	Hx JAK2 exon 12+ secondary myelofibrosis	2019	NA	2019	7	112.3	24	0.85	0.06	0.04	0.03	0	0	0.84	46,XY[20]	Normal	CEBPA	c.332_339del	p.Ala111fs	0.483	NM_004364.4	Favorable
																														CEPBA	c.759dup	p.Lys254fs	0.473	NM_004364.4
																														TET2	c.2746C>T	p.Gln916*	0.489	NM_001127208.2
																														TET2	c.4201G>T	p.Glu1401*	0.436	NM_001127208.2
																														WT1	c.1410_1411ins34	p.Arg471fs	0.01	NM_024426.4
	34	17-319						Male	75	AML	AML with myelodysplasia related changes	Newly diagnosed	Deceased		2017	NA	2017	6.9	1.71	28	0.08	0.58	0.26	0.02	0	0	0.2	46,XY,add(5)(q11.2)[2]	ABNORMAL FISH RESULTS	TP53	c.445del	p.Ser149fs	0.503	NM_000546.5	Adverse
	also used in colony assays																											/45,sl,der(7;14)(q10;10),+0-2mar[cp5]	5q31 (EGR1): deletion present	TP53	c.656_657delinsG	p.Pro219fs	0.076	NM_000546.5
																												/46,XY[3]	8q22 (RUNX1T1): deletion present	U2AF1	c.470A>C	p.Gln157Pro	0.353	NM_006758.2
	* denotes 2 samples from the same patient			DLBCL - diffuse large B cell lymphoma		NOS - not otherwise specified
	AML - acute myeloid leukemia			MDS - myelodysplastic syndrome		NA - not applicable
	APL - acute promyelocytic leukemia			MF - myelofibrosis		NR - not reported
	CMML - chronic myelomonocytic leukemia			MPN - myeloproliferative neoplasm		PTLD - post transplant lymphoprolifeartive disease
