# Supplementary material for: SIRT5 Is a Druggable Metabolic Vulnerability in Acute Myeloid Leukemia
Source: Oxford University Press journal article supplement (doi:10.1158/2643-3230.bcd-20-0168), 2021-04-10
Supplement: 26433230bcd200168-sup-251721_2_supp_6933108_q1shq2.xlsx [file 26433230bcd200168-sup-251721_2_supp_6933108_q1shq2.xlsx]

## Sheet: Table S2
Table S2. Ranked list of 1,287 genes from shRNA library screen in primary AML cells. The 1,287 genes assessed with an shRNA library screen were sorted by the second highest percentile fold change present in 2 shRNA and across 2 samples, with the 34 genes showing a fold change in the top 2 percent in more than 2 samples listed first.
Rank	Gene
1	LTB4R
2	ARIH2
3	NEB
4	THY1
5	SIRT5
6	C1QC
7	NRAS
8	UBE2E3
9	TNFRSF1B
10	FCRL4
11	XRCC5
12	SP1
13	CDKN2C
14	SNRNP200
15	PAX1
16	ZNF416
17	NACA
18	FGF5
19	ANAPC4
20	AVPR1B
21	TICAM2
22	EPB41
23	RPL13
24	CD6
25	ADK
26	TOB1
27	FGF6
28	MKI67
29	TP53BP1
30	POLR2A
31	B4GALT4
32	BCL2
33	PSMB2
34	THPO
35	APEX1
36	MAGEC1
37	TOP1
38	VAV1
39	INSR
40	CREB1
41	FES
42	UMOD
43	GPLD1
44	FGB
45	ATXN1
46	RPSA
47	ASNS
48	ATF2
49	GMPPA
50	PRF1
51	ABCC3
52	ARG2
53	FLI1
54	IL1B
55	MTA3
56	RRM1
57	RPS6
58	ADORA3
59	GNAI3
60	RPL4
61	CALR3
62	KIT
63	CYLD
64	TGFB1
65	TUBA1C
66	ARRB1
67	IRX5
68	PRKACG
69	KIF11
70	PRKCQ
71	ISL1
72	RUNX1T1
73	PSMA6
74	AMBP
75	ARL11
76	ODC1
77	TGM2
78	XIAP
79	WNT8A
80	ANAPC2
81	POFUT1
82	TP73
83	RET
84	CDK11A
85	PPIC
86	ATIC
87	BAK1
88	SH3GL1
89	TGM1
90	LAMA5
91	TERT
92	ALS2
93	ANXA5
94	DAB2
95	THRB
96	THRA
97	BAX
98	CD86
99	ENO1
100	MCM3
101	ACP5
102	TFR2
103	ITGB1
104	CRP
105	FASLG
106	GRB2
107	APOE
108	PDZK1
109	PSMA2
110	MAPK3
111	TAF15
112	NUP98
113	RXRB
114	NR1H3
115	CD46
116	DAD1
117	IGF1
118	FANCL
119	IKZF1
120	LPIN1
121	SNAP47
122	INPP4A
123	HNRNPC
124	CAMP
125	CDC23
126	SEL1L
127	RBKS
128	CCL3
129	SNRPD2
130	FBL
131	DISC1
132	C8G
133	CCNB1
134	RPL14
135	RPL11
136	SPRY1
137	KPNB1
138	CCR7
139	TNFAIP3
140	FGA
141	LDHC
142	CDKN1B
143	DNMT3B
144	HDAC3
145	NAT2
146	APPBP2
147	MMP9
148	MLL
149	BRCA2
150	CD58
151	HNRNPK
152	RAD51
153	ACVRL1
154	CD2
155	TINF2
156	ITGA1
157	SELE
158	ENPP1
159	AKT1
160	PSMB6
161	MAML2
162	IGFBP3
163	FBXW12
164	ABCA9
165	CDK11B
166	ABCC5
167	DPF2
168	ARAP2
169	ITGAX
170	NOTCH1
171	REL
172	GGCX
173	RANBP9
174	HOXB4
175	IL4
176	CYP2C8
177	STAT3
178	HK2
179	GAB2
180	CASR
181	PSMD11
182	POLR2L
183	PSMD1
184	CAPZA1
185	PAF1
186	E2F5
187	EIF3H
188	IRF6
189	NFKB1
190	EED
191	HMHA1
192	CLDN22
193	PPT2
194	EIF2S2
195	CCL2
196	SLC12A2
197	XK
198	MTHFR
199	RPS3A
200	CNTF
201	CDK4
202	FMO2
203	RHOH
204	CYP2C19
205	TLE4
206	RANBP2
207	DDX23
208	TFF1
209	TFRC
210	CHRNA9
211	MPO
212	FANCA
213	GTF3C3
214	IFNA2
215	LINGO4
216	SERPINA1
217	TG
218	CRABP2
219	TERF2IP
220	PTX3
221	SI
222	TNFRSF1A
223	ARG1
224	ERN1
225	GALNT3
226	MYC
227	FDFT1
228	DNMT3A
229	NAIP
230	OR2G2
231	ELL
232	ETS2
233	TIE1
234	PRPF40A
235	RIPK4
236	MSH6
237	FOXK1
238	CBFB
239	PSMB4
240	XPO1
241	RPS13
242	AXL
243	ADCYAP1
244	WARS
245	GSTT1
246	PTPRC
247	VDR
248	GNPTAB
249	FGF7
250	NEDD8
251	NRF1
252	CXCL11
253	YBX1
254	IRF4
255	CXCR5
256	FNTB
257	TPMT
258	BCL6
259	SP100
260	TNFSF10
261	IL5
262	TYRO3
263	STMN1
264	ABCC10
265	PNRC1
266	IGFBP2
267	IL7R
268	MNAT1
269	INPP5B
270	BCL11B
271	HMMR
272	PAG1
273	CCR2
274	NFE2L2
275	EFTUD2
276	KITLG
277	HGFAC
278	BMP6
279	CSF2RA
280	ERAP1
281	HOXA7
282	GSN
283	BMP7
284	PRND
285	C4B
286	HMOX1
287	POLR2F
288	MYB
289	PTPN7
290	AMD1
291	BRAF
292	HBEGF
293	BET1
294	RBM8A
295	TNFRSF13B
296	ADIPOQ
297	YY1
298	NCOA3
299	CSDA
300	NTSR1
301	ATF3
302	NR2E1
303	AHCY
304	FOXK2
305	NFKBIA
306	EGFR
307	PDHX
308	MLF1
309	NR3C2
310	SELP
311	IL1RL1
312	ALDH1L1
313	ADCY4
314	SDC1
315	KRAS
316	ARSB
317	FARS2
318	FFAR2
319	TLE1
320	CCNE2
321	LDLR
322	PSMA3
323	RAD21
324	ADA
325	SRP68
326	FADD
327	FASN
328	GZMB
329	EWSR1
330	PSMC1
331	CD19
332	LIG4
333	FLT4
334	CRKL
335	FOSL1
336	KCNB1
337	PML
338	CYP7A1
339	RBPJ
340	RAB3GAP1
341	TGM3
342	CR2
343	KCNRG
344	CD28
345	KCNH2
346	LRMP
347	TNPO2
348	ITGB2
349	HFE
350	LEF1
351	CLIC1
352	CPSF1
353	DCK
354	PLK1
355	IL23A
356	DIABLO
357	SPAM1
358	FOXO3
359	SREBF2
360	ADAM9
361	LHX2
362	TIMP1
363	ADAM15
364	FOXO1
365	TIMP3
366	TYROBP
367	SFRP1
368	ORM1
369	HDAC1
370	GNB1
371	HLX
372	EIF3A
373	POU4F1
374	EGR1
375	HCLS1
376	AMICA1
377	GGT1
378	ACACA
379	MN1
380	RNF4
381	RUVBL1
382	PRPF19
383	AOX1
384	SERPINA10
385	PER2
386	TNFSF13
387	KRT1
388	BLVRA
389	AHR
390	HAS1
391	FCER2
392	S100A10
393	SULT4A1
394	KDR
395	MMP1
396	SLC35A2
397	IL23R
398	ERBB2
399	MMP8
400	KDM3B
401	HTR2A
402	ACHE
403	CCNA2
404	IL2RA
405	HTR2C
406	METTL2B
407	FOXN1
408	SCTR
409	RPL30
410	BMI1
411	BIRC2
412	GPHN
413	BIRC3
414	GRB10
415	ERG
416	CDKN2A
417	MAGED1
418	MS4A1
419	PIGK
420	BCL2L11
421	LAT2
422	ETS1
423	HMGB2
424	ASIC3
425	BIRC5
426	FGF1
427	MME
428	POLR2D
429	DAPK1
430	SLC7A5
431	TLX1
432	CREBBP
433	ITGA5
434	PSMA1
435	ACO1
436	BLNK
437	HRAS
438	HOXB5
439	APLP1
440	WNT11
441	SPANXA1
442	LY96
443	FOXO4
444	PDGFA
445	CALR
446	ABI1
447	GIPC3
448	SMUG1
449	NR4A2
450	IGSF5
451	TP53
452	UGP2
453	EPHA7
454	PMAIP1
455	GTF2A1L
456	GLB1
457	PLA2G6
458	MLLT1
459	CD44
460	BLM
461	RBM15
462	S1PR5
463	RASGRP1
464	ICAM1
465	ITGAL
466	PGGT1B
467	TTR
468	TNFRSF10D
469	ADH4
470	TOP2A
471	WHSC1L1
472	FOXP2
473	FUS
474	BST2
475	MSMO1
476	BID
477	CSNK1A1L
478	ACSL3
479	CD34
480	CCND2
481	CD1A
482	REXO2
483	THADA
484	FECH
485	SMPD1
486	STK36
487	AICDA
488	BATF
489	CCNE1
490	NR4A3
491	XRCC1
492	SFRP2
493	ETV6
494	PPP1R13B
495	RBX1
496	HOXA1
497	ALDH1A2
498	SMARCC1
499	SNRPA1
500	CBX2
501	ANGPT2
502	EZH1
503	MLLT3
504	ARHGEF12
505	MAPK14
506	IL3RA
507	JAG1
508	TNF
509	APP
510	FOXP1
511	CCR5
512	RBBP8
513	MAFB
514	DDX1
515	MCL1
516	IGF2
517	ARMC9
518	RUNX2
519	ANGPT1
520	CMYA5
521	PLD2
522	ANPEP
523	CSF1R
524	CYP1A1
525	PLCG1
526	RTF1
527	SIGIRR
528	CAV3
529	CXCL12
530	RIN1
531	BECN1
532	BTBD7
533	TOPORS
534	BRCA1
535	FOXP3
536	LMO1
537	CDH5
538	WWTR1
539	PER1
540	MCM2
541	NCOR2
542	ADAM11
543	RPL10
544	TRRAP
545	ATP5C1
546	RAN
547	ANKHD1
548	CHUK
549	HOXB6
550	HBB
551	NPR3
552	CYP2C9
553	LETMD1
554	ABI2
555	CD74
556	B2M
557	PLG
558	HLA-B
559	ZFP91
560	ATP10B
561	CYBA
562	IL12RB1
563	RPL8
564	PRDX4
565	CLTC
566	CDC37
567	PTK2B
568	NPM1
569	TSHB
570	POLR2B
571	SLC19A1
572	HSPE1
573	PFN1
574	IRS1
575	PVR
576	ZMYM2
577	MAD1L1
578	SIX3
579	CD40
580	SLC6A1
581	REN
582	IL2
583	AQP7
584	PURA
585	GPD2
586	ITGB7
587	NEK2
588	PLAG1
589	F2
590	PRKD1
591	FLNC
592	POLR2C
593	CDT1
594	RANBP1
595	HLA-A
596	TFPI
597	ATM
598	RPL12
599	ARSA
600	MMP14
601	EIF4E
602	LHCGR
603	PFKP
604	ABL1
605	TWIST1
606	T
607	DNASE1
608	AKR1C3
609	CASP10
610	ERCC2
611	CD36
612	MOS
613	CD83
614	GPD1
615	RIPK3
616	PRTN3
617	YWHAB
618	PRKRIR
619	MYO1G
620	PRAME
621	TCL1A
622	TLL1
623	ITGAM
624	RARB
625	DIS3
626	IKBKG
627	CD80
628	MBD1
629	PDE7A
630	FOSL2
631	HCK
632	MICB
633	CCL4
634	CDX2
635	MGAT2
636	PTPN6
637	ACOX1
638	KNG1
639	TNKS
640	TRIP11
641	RUNX1
642	CCNB3
643	PPIB
644	SKP2
645	TERF1
646	BCL2L2
647	VEGFA
648	GAS2
649	IKZF3
650	BMP2
651	SP3
652	ADAM2
653	ALDH1A1
654	CTDSPL
655	GIMAP5
656	IRF1
657	SOCS3
658	PRKCB
659	EEF2
660	EIF4EBP1
661	WNT7B
662	RGS2
663	USP19
664	CD33
665	ELANE
666	PRG2
667	CTNNB1
668	FHIT
669	L1CAM
670	PLAU
671	PRRX1
672	BCL3
673	MLLT10
674	BCL9
675	FGFR3
676	MECP2
677	SNW1
678	MSI2
679	PIK3C2G
680	HLA-C
681	TAT
682	TLR4
683	VWF
684	XRCC3
685	WWOX
686	INHBE
687	ITGA4
688	PPP1R10
689	STEAP3
690	CTLA4
691	ELK4
692	CDC16
693	ERBB3
694	NDUFS1
695	MYCL1
696	FZD5
697	SULT1A1
698	SH2D1A
699	ADH1B
700	BCL2L12
701	APBA1
702	MAPK1
703	JAG2
704	ANP32A
705	P2RY12
706	ZBTB32
707	A4GNT
708	MLLT6
709	AQR
710	MAP4K2
711	NTRK3
712	KAT6A
713	SLC18A1
714	ABTB1
715	PLAUR
716	CPSF6
717	UBE2M
718	RUVBL2
719	RPS6KA1
720	RPL6
721	HELLS
722	AFF4
723	RHOA
724	DDX10
725	NRP1
726	RARRES3
727	BIK
728	NKRF
729	ABCB4
730	FRZB
731	FOLR2
732	GRIK4
733	AIFM1
734	HOXA11
735	LEPR
736	PRKCA
737	XYLT2
738	HDAC6
739	HOXD11
740	GYPA
741	FAM46C
742	KLRK1
743	GABARAPL2
744	ABCB7
745	GALC
746	DGKG
747	SOD2
748	CASP1
749	RNASE3
750	SOS1
751	TTN
752	TOP2B
753	APOB
754	PSME3
755	TEC
756	MUC1
757	JUNB
758	CIITA
759	HS2ST1
760	IKBIP
761	MOGAT3
762	RNF168
763	MTCP1
764	TNFRSF10B
765	VCAM1
766	NCOA2
767	PRDM1
768	AFF1
769	ABCC2
770	LMO2
771	PSMD3
772	GGT7
773	GADD45A
774	HOXA3
775	HOXC13
776	FGF11
777	XAF1
778	CKS1B
779	MEN1
780	PLK4
781	BTK
782	IL3
783	DNM2
784	ICOSLG
785	ALG5
786	APRT
787	F3
788	CCR9
789	CD163
790	DKK1
791	IL8
792	ARHGEF3
793	ACSL5
794	NFATC1
795	CFLAR
796	BCHE
797	CA2
798	LPL
799	PSMD7
800	IFITM1
801	SLC9A1
802	ADAMTS8
803	WARS2
804	PROM1
805	ENDOG
806	CR1
807	STX12
808	AKR1A1
809	HGF
810	OAS2
811	PSMA7
812	FOS
813	PICALM
814	FGF2
815	HES3
816	NUP155
817	HNRNPA1
818	CYP51A1
819	EP300
820	IKBKB
821	FURIN
822	RPS6KB1
823	KDM6A
824	HOXA10
825	SEMA3A
826	PDGFRA
827	MAP4K5
828	FAS
829	NR1D2
830	CHRNE
831	GYS1
832	S1PR1
833	PDGFB
834	MAP2K1
835	GNLY
836	CASP9
837	TLN2
838	MYBL1
839	ABCC4
840	CD27
841	NEU3
842	CACNA1G
843	MDM2
844	CASP3
845	CD5
846	EIF4G2
847	EFNA4
848	ABCB1
849	PAX5
850	TACC3
851	CDK2
852	RALBP1
853	SC5DL
854	CYP21A2
855	HOXA5
856	RPN1
857	UBB
858	ABL2
859	ANXA2
860	APAF1
861	IL4R
862	MAP3K14
863	CACNA1F
864	OGG1
865	PPARG
866	POLD1
867	PITX2
868	ZNF521
869	RAP1A
870	ATF4
871	TNFRSF17
872	DDX43
873	MEF2D
874	ZC3H18
875	NNMT
876	PFKFB3
877	ABCC1
878	CYP3A4
879	MVD
880	MTHFD1
881	BUB3
882	PACRG
883	TFDP2
884	LY75
885	CYP4F2
886	SMS
887	PDE10A
888	CARM1
889	AHI1
890	PIAS4
891	PSMB7
892	NDUFA1
893	A2M
894	CDK6
895	ATG12
896	HIF1A
897	CPSF2
898	FN1
899	ING4
900	CLTCL1
901	HSPA4
902	KLRD1
903	SALL4
904	SLC4A5
905	BCR
906	JAK1
907	HOXD3
908	OPRM1
909	IL6
910	IL1RN
911	F7
912	PTBP3
913	RBL2
914	UVRAG
915	STAT1
916	VWA2
917	HOXA6
918	SPI1
919	CXCR3
920	MPL
921	AKR1B1
922	PDZD8
923	CDC25A
924	IFNA1
925	CSMD2
926	PDGFRB
927	AREG
928	MLLT4
929	SHC1
930	CLCN2
931	CPOX
932	FGFR2
933	TNFSF8
934	ELF2
935	JUN
936	PTPRH
937	STAT6
938	EIF2AK2
939	TPP2
940	AURKB
941	IL10
942	NEBL
943	MARCKS
944	CARD11
945	MDM4
946	BACH2
947	FCGR2A
948	LRRK2
949	BTG1
950	ITK
951	SAP18
952	ESR1
953	CALCA
954	GTF2H3
955	ASTL
956	MAPKAPK5
957	SUCLG1
958	MMP2
959	SOCS5
960	IL7
961	WT1
962	ADRA2C
963	FANCG
964	QDPR
965	SNX19
966	NCOA1
967	HMGCR
968	IDO1
969	OGDH
970	PSMC2
971	LCK
972	CASP7
973	C14orf166
974	TACR1
975	ANXA1
976	FCRL5
977	BCL2L1
978	TCF7L1
979	JAK3
980	TAF10
981	ATP1A1
982	AKR1C4
983	CEACAM6
984	MEF2C
985	MTOR
986	PRKCD
987	CDC40
988	CYP4B1
989	ELAVL2
990	SSFA2
991	EIF2S1
992	BTRC
993	OSBP2
994	ALB
995	CBFA2T2
996	BUB1
997	CASP8AP2
998	PSMC3
999	CCR6
1000	GNB2L1
1001	SYNJ1
1002	TRAF3
1003	MSH2
1004	COMT
1005	HOXB9
1006	HOXB2
1007	NR3C1
1008	TNFRSF10A
1009	DCTD
1010	SLITRK4
1011	DNTT
1012	E2F1
1013	STAT5B
1014	CCL20
1015	NEUROD1
1016	PSMD6
1017	ENG
1018	SNRPN
1019	IL1A
1020	STAT5A
1021	ALDH18A1
1022	RAD17
1023	GABPA
1024	CCNA1
1025	GATA2
1026	SP7
1027	GAPDH
1028	DEK
1029	LTA
1030	NLRC4
1031	GMPR2
1032	PPARA
1033	IGF1R
1034	CAGE1
1035	UGT1A1
1036	MLL3
1037	GSS
1038	HLF
1039	TNFRSF8
1040	LRWD1
1041	GNGT1
1042	SET
1043	ACTB
1044	GLO1
1045	MAGEC2
1046	HOXB3
1047	SHFM1
1048	HOXB7
1049	CHEK1
1050	G6PD
1051	HARS2
1052	CD96
1053	ABCG2
1054	SPA17
1055	DLST
1056	CMKLR1
1057	HSPD1
1058	ARNT
1059	ENO3
1060	HOXB8
1061	CYP26A1
1062	APOA1
1063	DLK1
1064	PARP1
1065	IARS2
1066	BNIP3
1067	HSP90AA1
1068	STC1
1069	SMARCA4
1070	HIST4H4
1071	PDPK1
1072	ANG
1073	HSD3B2
1074	PSMD12
1075	NME1
1076	NFKB2
1077	IL6R
1078	TNFRSF11B
1079	CSE1L
1080	MECOM
1081	MAF
1082	MEIS1
1083	TCF3
1084	CD14
1085	BCL10
1086	DDX20
1087	PSMC6
1088	TEK
1089	KLF10
1090	RELA
1091	NR0B2
1092	GSK3B
1093	ACSL6
1094	CAT
1095	NR1H4
1096	ARHGAP26
1097	SLC1A2
1098	NF1
1099	HIPK1
1100	ASS1
1101	IL6ST
1102	MAPK8
1103	SULF1
1104	JAK2
1105	CDK1
1106	ENPP7
1107	PLCB1
1108	DUSP12
1109	BRS3
1110	CCND1
1111	SAMHD1
1112	RBBP4
1113	ABCA3
1114	SULT2A1
1115	PTAFR
1116	CSMD3
1117	ATP8A1
1118	ALKBH3
1119	DGUOK
1120	EBP
1121	GNPDA2
1122	RARA
1123	ADIPOR2
1124	DHCR7
1125	DACT1
1126	NCR1
1127	LOXL2
1128	SMAD7
1129	MVP
1130	FPGS
1131	FLT1
1132	CHL1
1133	BAALC
1134	NADK
1135	CSF2
1136	TUBA1A
1137	PLAT
1138	CBL
1139	CD9
1140	HOXD13
1141	VAMP7
1142	SELRC1
1143	ASCC3
1144	LIF
1145	MSH3
1146	CD3E
1147	CCNK
1148	MLH1
1149	BRD4
1150	HSF1
1151	TNFSF11
1152	MLL4
1153	CAV1
1154	FLOT1
1155	APOBEC3F
1156	SMAD4
1157	CSF1
1158	PIK3CD
1159	HOXA4
1160	MAGEA3
1161	ATF1
1162	AKAP13
1163	OSBPL6
1164	HOXA9
1165	DRD1
1166	LYN
1167	GABRG3
1168	CD38
1169	TERF2
1170	ADAM12
1171	AKT2
1172	CDX4
1173	NTRK2
1174	NAA10
1175	FHL5
1176	FGG
1177	MAP3K5
1178	MAP3K1
1179	TADA2A
1180	CDH1
1181	NQO1
1182	GATA4
1183	PRDM2
1184	PF4
1185	DDX18
1186	EIF1AX
1187	APC
1188	XRCC4
1189	MLL2
1190	GRIK3
1191	ASB2
1192	ADAM18
1193	OPRD1
1194	IL15
1195	ZAP70
1196	HSPA12A
1197	PTEN
1198	ALOX12B
1199	PCDHA12
1200	TPK1
1201	FLT3
1202	GSTP1
1203	PSMD2
1204	CHEK2
1205	EPO
1206	SMARCB1
1207	ERBB4
1208	HOXC11
1209	DUSP2
1210	CXCR4
1211	RB1
1212	CCL8
1213	RTN4
1214	SLC5A5
1215	ATP6AP1
1216	LIPC
1217	HPRT1
1218	CASP8
1219	DUSP8
1220	HSP90B1
1221	CD81
1222	PIAS3
1223	CTSK
1224	EGF
1225	BCL11A
1226	BST1
1227	PARK2
1228	SRRM2
1229	AVEN
1230	MAP3K11
1231	RUNX3
1232	DDIT3
1233	CCNH
1234	IDH3B
1235	HSPA9
1236	CUX2
1237	F5
1238	TAL1
1239	GPR158
1240	HPSE
1241	ADAM17
1242	MLLT11
1243	ALOX5
1244	CBFA2T3
1245	DNAJA3
1246	GSTO1
1247	ASH2L
1248	DOK1
1249	TAB1
1250	BAG3
1251	CD40LG
1252	NES
1253	BAD
1254	IFNB1
1255	IMMT
1256	SUPT6H
1257	DHFR
1258	ADM
1259	KDSR
1260	DEFA1
1261	TNFSF13B
1262	CASP2
1263	GATA1
1264	PIM1
1265	MYEOV
1266	LAMP2
1267	CD48
1268	AZGP1
1269	SLC33A1
1270	PTK2
1271	IBSP
1272	ARHGEF6
1273	PTH
1274	IL13
1275	PBX1
1276	CMAS
1277	WHSC1
1278	PRNP
1279	BCL2A1
1280	HHIPL2
1281	PTN
1282	ALK
1283	GRID1
1284	CD55
1285	MET
1286	IFNG
1287	PTGS2
