# Supplementary material for: SIRT5 Is a Druggable Metabolic Vulnerability in Acute Myeloid Leukemia
Source: Oxford University Press journal article supplement (doi:10.1158/2643-3230.bcd-20-0168), 2021-04-10
Supplement: 26433230bcd200168-sup-251721_2_supp_6933110_qxshq2.xlsx [file 26433230bcd200168-sup-251721_2_supp_6933110_qxshq2.xlsx]

## Sheet: Table S4
Table S4. Next generation sequencing for 52 myeloid malignancies-related genes.
Cell line	Gene	Allele Freq	Amino acid change	SIRT5 dependent
CMK	ETV6	0.287661	p.Arg163Met	yes
	JAK2	0.98998	p.Val617Phe
	TP53	0.998152	p.Met133Lys
GF-D8	NRAS	0.501533	p.Gly13Asp	yes
	NSD1	0.95676	p.Leu1361fs
	TP53	0.998091	p.Met237Ile
HEL	JAK2	0.999738	p.Val617Phe	yes
	TP53	0.998369	p.Met133Lys
K562	ASXL1	0.287934	p.Tyr591*	yes
	TP53	0.925955	p.Gln136_Leu137fs
KBM3	ASXL1	0.961992	p.Pro763fs	yes
KCL22	ASXL1	0.319028	p.Gly653_Ala654fs	no
	ASXL1	0.416416	p.Pro874Leu
	BCORL1	0.122857	p.Pro455Leu
	BCORL1	0.12503	p.Ser1679fs
	CEBPA	0.188351	p.Pro39Leu
	CEBPA	0.164107	p.His58Gln
	CEBPA	0.161531	p.Cys56Trp
	CEBPA	0.258089	p.Pro22Pro
	CEBPA	0.20061	p.His84Gln
	CSF3R	0.349653	p.Gln801Arg
	DNMT1	0.11962	p.Met712Thr
	FLT3	0.0319505	p.Ala627Thr
	JAK3	0.384691	p.Leu1017Met
	KDM6A	0.395969	p.Glu22Asp
	KMT2A	0.214191	p.Lys345Asn
	NOTCH1	0.0333483	p.Asp2088Asn
	NOTCH1	0.256874	p.Pro2253Leu
	NSD1	0.0366067	p.Cys1606Arg
	SF3A1	0.057468	p.Gln253His
	SMC1A	0.470168	p.Ter1234Glnext*?
	TET2	0.0568539	p.Gln654fs
	TP53	0.0436714	p.Arg175His
	TP53	0.0505269	p.Arg248Gln
	TP53	0.792595	p.Pro301fs
	U2AF2	0.0785948	p.Glu17Gln
KG1a	TP53	0.996029	[c.672+1G>A]	no
KYO-1	RAD21	0.512686	p.Thr316_Lys317fs	yes
	TP53	0.99947	p.Arg248Gln
Marimo	CALR	0.22	[del61]	no
	MPL	0.42176	p.Ser505Asn
	NRAS	0.492031	p.Gln61Lys
	TP53	0.999735	p.Cys135Tyr
MKPL-1	TP53	0.522531	p.Arg213*	yes
	TP53	0.479357	p.Val272Met
M07e	NRAS	0.0506929	p.Gln61Lys	yes
	TP53	0.393615	p.Cys135Phe
Molm13	CBL	0.18	[del14]	no
	KMT2A	0.449728	p.Ala1653Thr
Molm14	BCOR	0.25	[del25]	yes
	CBL	0.19	[del14]
	FLT3	0.26	[ins21]
	KMT2A	0.45975	p.Ala1653Thr
MonoMac-1	ASXL1	0.382667	p.Leu1393fs	yes
	FLT3	0.668064	p.Val592Ala
	RUNX1	0.486164	p.Ala134Val
	U2AF1	0.482709	p.Gln157Pro
MV4-11	FLT3	0.49	[ins30]	yes
OCI-AML2	DNMT3A	0.998759	p.Arg635Trp	yes
	FLT3	0.46239	p.Ala680Val
	TP53	0.249014	p.Val218Met
	TP53	0.494954	p.Ser215Gly
OCI-AML3	DNMT3A	0.459584	p.Arg882Cys	no
	NPM1	0.213251	p.Leu287_Trp288fs
	NRAS	0.999774	p.Gln61Leu
OCI-AML5	ASXL1	0.466283	p.Tyr591*	yes
	EZH2	0.999647	p.Arg690His
	RUNX1	0.139047	p.Thr148_Ala149fs
	TET2	0.491517	p.Ser825*
SET2	DNMT3A	0.475667	p.Arg882His	yes
	JAK2	0.835669	p.Val617Phe
	TP53	0.538352	[c.559+2T>A]
	TP53	0.480792	p.Arg248Trp
SKM-1	ASXL1	0.993598	p.Tyr591*	yes
	BCOR	0.999044	[c.4977-1G>A]
	BCORL1	0.999095	[c.4619-1G>A]
	EZH2	0.990432	p.Tyr646Cys
	KRAS	0.997739	p.Lys117Asn
	TET2	0.462901	p.Leu1418_Pro1419fs
	TP53	1	p.Arg248Gln
SKNO-1	KIT	0.998862	p.Asn822Lys	yes
	TP53	0.998821	p.Arg248Gln
TF-1	BCOR	0.104777	p.Tyr985Cys	no
	NRAS	0.489647	p.Gln61Pro
	TP53	0.469939	[c.673-2A>G]
	TP53	0.404171	p.Ile251fs
THP1	NRAS	0.645295	p.Gly12Asp	yes
	TP53	1	[del26]
UT-7	TP53	0.998753	[c.919+2T>G]	yes
	SIRT5-dependent
	SIRT5-independent
