# Supplementary material for: SIRT5 Is a Druggable Metabolic Vulnerability in Acute Myeloid Leukemia
Source: Oxford University Press journal article supplement (doi:10.1158/2643-3230.bcd-20-0168), 2021-04-10
Supplement: 26433230bcd200168-sup-251721_2_supp_6933111_qnshq2.xlsx [file 26433230bcd200168-sup-251721_2_supp_6933111_qnshq2.xlsx]

## Sheet: Table S5
Table S5. The 1,287 genes targeted by the shRNA of the leukemia library.
Label	#	Entrez ID	Gene Name	RefSeq#	Barcode ID	Agilent Sequence
DNTT|NM_001017520|1395	1	1791	DNTT	NM_001017520	1395	TAGAAGACGCACCGGCACATATGAGTGGAAGATGATGTTAATATTCATAGCATCATCTTCCGCTCATGTGTGTTTTTTGGCAAGCAAAAGACGGCATACGAGATGTGTGTCACACATGGTTGTTCGCCGTCTTCGT
DNTT|NM_001017520|1396	2	1791	DNTT	NM_001017520	1396	TAGAAGACGCACCGGGTATGCGTGTTAGAGAAGAATGTTAATATTCATAGCGTTCTTCTCTGACACGCATACTTTTTTGGCAAGCAAAAGACGGCATACGAGATTGGTGTCACACATGCAGTTTCGCCGTCTTCGT
DOK1|NM_001197260|1397	3	1796	DOK1	NM_001197260	1397	TAGAAGACGCACCGGGCTCGAGTTCTTTGACTATAAGTTAATATTCATAGCTTATGGTCAAAGAACTCGAGCTTTTTTGGCAAGCAAAAGACGGCATACGAGATGTGTGTCACACATGCACATTCGCCGTCTTCGT
DOK1|NM_001197260|1398	4	1796	DOK1	NM_001197260	1398	TAGAAGACGCACCGGGCCTACTGATAACCCACTTAAGTTAATATTCATAGCTTAGGTGGGTTATCGGTAGGCTTTTTTGGCAAGCAAAAGACGGCATACGAGATACGTGTCACACATGCAACTTCGCCGTCTTCGT
DOK1|NM_001197260|1399	5	1796	DOK1	NM_001197260	1399	TAGAAGACGCACCGGCCCAAAGAGGATTCCATTTATGTTAATATTCATAGCATAGATGGGATCCTCTTTGGGTTTTTTGGCAAGCAAAAGACGGCATACGAGATCAGTGTCACACATGCATGTTCGCCGTCTTCGT
DOK1|NM_001197260|1400	6	1796	DOK1	NM_001197260	1400	TAGAAGACGCACCGGGAGGGAGTATAATGGAAGAAAGTTAATATTCATAGCTTTCTTCCGTTGTACTCCCTCTTTTTTGGCAAGCAAAAGACGGCATACGAGATGTGTGTCACACATGACGTTTCGCCGTCTTCGT
DOK1|NM_001197260|1401	7	1796	DOK1	NM_001197260	1401	TAGAAGACGCACCGGAGGGAGTACAATGGAAGAAATGTTAATATTCATAGCGTTTCTTCCGTTGTACTCCCTTTTTTTGGCAAGCAAAAGACGGCATACGAGATCAGTGTCACACATGACCATTCGCCGTCTTCGT
DOK1|NM_001197260|1402	8	1796	DOK1	NM_001197260	1402	TAGAAGACGCACCGGTCTAGAGTAGGGATTGATAAGGTTAATATTCATAGCCTTGTCAGTCCCTACTCTAGATTTTTTGGCAAGCAAAAGACGGCATACGAGATTGGTGTCACACATGACACTTCGCCGTCTTCGT
DOK1|NM_001197260|1403	9	1796	DOK1	NM_001197260	1403	TAGAAGACGCACCGGGGATCCCATTTATGATGAATCGTTAATATTCATAGCGGTTCATCATAGATGGGATCCTTTTTTGGCAAGCAAAAGACGGCATACGAGATACGTGTCACACATGACTGTTCGCCGTCTTCGT
DOK1|NM_001197260|1404	10	1796	DOK1	NM_001197260	1404	TAGAAGACGCACCGGAATGACATCTTCCAGGTAGTTGTTAATATTCATAGCAACTGCCTGGAAGATGTCATTTTTTTTGGCAAGCAAAAGACGGCATACGAGATCAGTGTCACACATGTGGTTTCGCCGTCTTCGT
DRD1|NM_000794|1405	11	1812	DRD1	NM_000794	1405	TAGAAGACGCACCGGGCCATCTCATCCTTTGTAATAGTTAATATTCATAGCTATTACAGAGGATGAGATGGCTTTTTTGGCAAGCAAAAGACGGCATACGAGATACGTGTCACACATGTGCATTCGCCGTCTTCGT
DRD1|NM_000794|1406	12	1812	DRD1	NM_000794	1406	TAGAAGACGCACCGGTGTGGTTTGGGTGGGTTAGTTGTTAATATTCATAGCAATTAGCCCACCCAAACCACATTTTTTGGCAAGCAAAAGACGGCATACGAGATGTGTGTCACACATGTGACTTCGCCGTCTTCGT
DRD1|NM_000794|1407	13	1812	DRD1	NM_000794	1407	TAGAAGACGCACCGGCTTTGCCTTGCGATGAATAATGTTAATATTCATAGCATTATTCGTCGCAGGGCAAAGTTTTTTGGCAAGCAAAAGACGGCATACGAGATTGGTGTCACACATGTGTGTTCGCCGTCTTCGT
DRD1|NM_000794|1408	14	1812	DRD1	NM_000794	1408	TAGAAGACGCACCGGTAGAGACGGTGAGTATTAATAGTTAATATTCATAGCTATTGATACTCACCGTCTCTATTTTTTGGCAAGCAAAAGACGGCATACGAGATTGGTGTCACAACGTGTGTTTCGCCGTCTTCGT
DRD1|NM_000794|1409	15	1812	DRD1	NM_000794	1409	TAGAAGACGCACCGGCAGGATTGCTCAGAAATAAATGTTAATATTCATAGCATTTGTTTCTGAGCAATCCTGTTTTTTGGCAAGCAAAAGACGGCATACGAGATGTGTGTCACAACGTGTCATTCGCCGTCTTCGT
DRD1|NM_000794|1410	16	1812	DRD1	NM_000794	1410	TAGAAGACGCACCGGTTTCTGGTATGAGAGAAAGATGTTAATATTCATAGCATCTTTCTCTCATACCGGAAATTTTTTGGCAAGCAAAAGACGGCATACGAGATACGTGTCACAACGTGTACTTCGCCGTCTTCGT
DRD1|NM_000794|1411	17	1812	DRD1	NM_000794	1411	TAGAAGACGCACCGGGGTTTGGGTGGGTTAATTTATGTTAATATTCATAGCATGAATTAGCCCACCCAAACCTTTTTTGGCAAGCAAAAGACGGCATACGAGATCAGTGTCACAACGTGTTGTTCGCCGTCTTCGT
DRD1|NM_000794|1412	18	1812	DRD1	NM_000794	1412	TAGAAGACGCACCGGTGATCAGTGTGGATAGGTATTGTTAATATTCATAGCAATACCTGTCCACGCTGATCATTTTTTGGCAAGCAAAAGACGGCATACGAGATGTGTGTCACAACGTCAGTTTCGCCGTCTTCGT
JAG1|NM_000214|1413	19	182	JAG1	NM_000214	1413	TAGAAGACGCACCGGCGGAGCATATTTGTAGTGAATGTTAATATTCATAGCATTCACTGCAAATGTGCTCCGTTTTTTGGCAAGCAAAAGACGGCATACGAGATCAGTGTCACAACGTCACATTCGCCGTCTTCGT
JAG1|NM_000214|1414	20	182	JAG1	NM_000214	1414	TAGAAGACGCACCGGCCGTTCAACCTGATAGTATTAGTTAATATTCATAGCTAATACTGTCAGGTTGAACGGTTTTTTGGCAAGCAAAAGACGGCATACGAGATTGGTGTCACAACGTCAACTTCGCCGTCTTCGT
JAG1|NM_000214|1415	21	182	JAG1	NM_000214	1415	TAGAAGACGCACCGGCCGAATGGAGTACATTGTATAGTTAATATTCATAGCTATACGATGTACTCCATTCGGTTTTTTGGCAAGCAAAAGACGGCATACGAGATACGTGTCACAACGTCATGTTCGCCGTCTTCGT
JAG1|NM_000214|1416	22	182	JAG1	NM_000214	1416	TAGAAGACGCACCGGGTGCACCTTTGACTCTTATTAGTTAATATTCATAGCTAATAGGAGTCAGAGGTGCACTTTTTTGGCAAGCAAAAGACGGCATACGAGATCAGTGTCACAACGTACGTTTCGCCGTCTTCGT
JAG1|NM_000214|1417	23	182	JAG1	NM_000214	1417	TAGAAGACGCACCGGCCTACTGTGAAACCAATATTAGTTAATATTCATAGCTAATATTGGTTTCACAGTAGGTTTTTTGGCAAGCAAAAGACGGCATACGAGATACGTGTCACAACGTACCATTCGCCGTCTTCGT
JAG1|NM_000214|1418	24	182	JAG1	NM_000214	1418	TAGAAGACGCACCGGGTCAGCTGGACATTGATTATTGTTAATATTCATAGCAATAATCGATGTCCAGCTGACTTTTTTGGCAAGCAAAAGACGGCATACGAGATGTGTGTCACAACGTACACTTCGCCGTCTTCGT
JAG1|NM_000214|1419	25	182	JAG1	NM_000214	1419	TAGAAGACGCACCGGGGACCTGGTTAATGGATTTAAGTTAATATTCATAGCTTAAATCCGTTAACCAGGTCCTTTTTTGGCAAGCAAAAGACGGCATACGAGATTGGTGTCACAACGTACTGTTCGCCGTCTTCGT
JAG1|NM_000214|1420	26	182	JAG1	NM_000214	1420	TAGAAGACGCACCGGGGGTCACTGTTAGAATGAAATGTTAATATTCATAGCATTTCATTCTGACAGTGACCCTTTTTTGGCAAGCAAAAGACGGCATACGAGATACGTGTCACAACGTTGGTTTCGCCGTCTTCGT
HBEGF|NM_001945|1421	27	1839	HBEGF	NM_001945	1421	TAGAAGACGCACCGGCTTCTCATGTTTAGGTATCATGTTAATATTCATAGCATGGTACCTAAACATGAGAAGTTTTTTGGCAAGCAAAAGACGGCATACGAGATTGGTGTCACAACGTTGCATTCGCCGTCTTCGT
HBEGF|NM_001945|1422	28	1839	HBEGF	NM_001945	1422	TAGAAGACGCACCGGAGTGAAGTTGGGCATGATTAAGTTAATATTCATAGCTTAGTCATGCCCAACTTCACTTTTTTTGGCAAGCAAAAGACGGCATACGAGATCAGTGTCACAACGTTGACTTCGCCGTCTTCGT
HBEGF|NM_001945|1423	29	1839	HBEGF	NM_001945	1423	TAGAAGACGCACCGGGCATCCATGGAGAATGTAAATGTTAATATTCATAGCATTTGCATTCTCCATGGATGCTTTTTTGGCAAGCAAAAGACGGCATACGAGATGTGTGTCACAACGTTGTGTTCGCCGTCTTCGT
HBEGF|NM_001945|1424	30	1839	HBEGF	NM_001945	1424	TAGAAGACGCACCGGGTGAAGTTGGGCATGATTAATGTTAATATTCATAGCATTAGTCATGCCCAACTTCACTTTTTTGGCAAGCAAAAGACGGCATACGAGATACGTGTCACAACCAGTGTTTCGCCGTCTTCGT
HBEGF|NM_001945|1425	31	1839	HBEGF	NM_001945	1425	TAGAAGACGCACCGGAGAGTCACTTTATCCTTCAAGGTTAATATTCATAGCCTTGGAGGATAAAGTGACTCTTTTTTTGGCAAGCAAAAGACGGCATACGAGATTGGTGTCACAACCAGTCATTCGCCGTCTTCGT
HBEGF|NM_001945|1426	32	1839	HBEGF	NM_001945	1426	TAGAAGACGCACCGGAAAGAAAGAAGAAAGGTAAGGGTTAATATTCATAGCCCTTGCCTTTCTTCTTTCTTTTTTTTTGGCAAGCAAAAGACGGCATACGAGATCAGTGTCACAACCAGTACTTCGCCGTCTTCGT
HBEGF|NM_001945|1427	33	1839	HBEGF	NM_001945	1427	TAGAAGACGCACCGGACTTCTGCATCTATGGAGAATGTTAATATTCATAGCATTCTCCATGGATGCAGAAGTTTTTTTGGCAAGCAAAAGACGGCATACGAGATGTGTGTCACAACCAGTTGTTCGCCGTCTTCGT
HBEGF|NM_001945|1428	34	1839	HBEGF	NM_001945	1428	TAGAAGACGCACCGGGGAGAATGTAAATATGTGAAGGTTAATATTCATAGCCTTCACATATTTGCATTCTCCTTTTTTGGCAAGCAAAAGACGGCATACGAGATTGGTGTCACAACCACAGTTTCGCCGTCTTCGT
DUSP2|NM_004418|1429	35	1844	DUSP2	NM_004418	1429	TAGAAGACGCACCGGACAACTAGATGGTGGAGATTAGTTAATATTCATAGCTGATCTCCACCATCTGGTTGTTTTTTTGGCAAGCAAAAGACGGCATACGAGATGTGTGTCACAACCACACATTCGCCGTCTTCGT
DUSP2|NM_004418|1430	36	1844	DUSP2	NM_004418	1430	TAGAAGACGCACCGGCGAGGTCTTTGACTTTGTTAAGTTAATATTCATAGCTTAACGAAGTCAAAGGCCTCGTTTTTTGGCAAGCAAAAGACGGCATACGAGATACGTGTCACAACCACAACTTCGCCGTCTTCGT
DUSP2|NM_004418|1431	37	1844	DUSP2	NM_004418	1431	TAGAAGACGCACCGGAGGAGGCTATAGGCTTTATTGGTTAATATTCATAGCCAATGAAGCCTATGGCCTCCTTTTTTTGGCAAGCAAAAGACGGCATACGAGATCAGTGTCACAACCACATGTTCGCCGTCTTCGT
DUSP2|NM_004418|1432	38	1844	DUSP2	NM_004418	1432	TAGAAGACGCACCGGCCAACTACTTTGAGGGTCTTTGTTAATATTCATAGCAAAGGCCCTCAAAGTGGTTGGTTTTTTGGCAAGCAAAAGACGGCATACGAGATGTGTGTCACAACCAACGTTTCGCCGTCTTCGT
DUSP2|NM_004418|1433	39	1844	DUSP2	NM_004418	1433	TAGAAGACGCACCGGTGGCATACCTCATGTAGAGTTGTTAATATTCATAGCGACTCTGCATGAGGTATGCCATTTTTTGGCAAGCAAAAGACGGCATACGAGATCAGTGTCACAACCAACCATTCGCCGTCTTCGT
DUSP2|NM_004418|1434	40	1844	DUSP2	NM_004418	1434	TAGAAGACGCACCGGGAGGTCTTTGACTTTGTTAAGGTTAATATTCATAGCCTTAACGAAGTCAAAGGCCTCTTTTTTGGCAAGCAAAAGACGGCATACGAGATTGGTGTCACAACCAACACTTCGCCGTCTTCGT
DUSP2|NM_004418|1435	41	1844	DUSP2	NM_004418	1435	TAGAAGACGCACCGGTTCATTGACTGGGTGAAGAATGTTAATATTCATAGCGTTCTTCACCCAGTCAATGAATTTTTTGGCAAGCAAAAGACGGCATACGAGATACGTGTCACAACCAACTGTTCGCCGTCTTCGT
DUSP2|NM_004418|1436	42	1844	DUSP2	NM_004418	1436	TAGAAGACGCACCGGAACCAGGTGGTGGAGATTAGTGTTAATATTCATAGCACTGATCTCCACCATCTGGTTTTTTTTGGCAAGCAAAAGACGGCATACGAGATCAGTGTCACAACCATGGTTTCGCCGTCTTCGT
DUSP8|NM_004420|1437	43	1850	DUSP8	NM_004420	1437	TAGAAGACGCACCGGGCTCCTTTGTGGAGTACAATAGTTAATATTCATAGCTGTTGTACTCCACGAAGGAGCTTTTTTGGCAAGCAAAAGACGGCATACGAGATACGTGTCACAACCATGCATTCGCCGTCTTCGT
DUSP8|NM_004420|1438	44	1850	DUSP8	NM_004420	1438	TAGAAGACGCACCGGCTCGTAGAAGGACGTCTTAAAGTTAATATTCATAGCTTTAGGACGTCCTTCTGCGAGTTTTTTGGCAAGCAAAAGACGGCATACGAGATGTGTGTCACAACCATGACTTCGCCGTCTTCGT
DUSP8|NM_004420|1439	45	1850	DUSP8	NM_004420	1439	TAGAAGACGCACCGGGAAGGTGGTGGATGCTAAGAAGTTAATATTCATAGCTTCTTGGCATCCATCACCTTCTTTTTTGGCAAGCAAAAGACGGCATACGAGATTGGTGTCACAACCATGTGTTCGCCGTCTTCGT
DUSP8|NM_004420|1440	46	1850	DUSP8	NM_004420	1440	TAGAAGACGCACCGGGCAGAAGGACGTTCTAAATAAGTTAATATTCATAGCTTGTTTAGGACGTCCTTCTGCTTTTTTGGCAAGCAAAAGACGGCATACGAGATCAGTGTCACAACACGTGTTTCGCCGTCTTCGT
DUSP8|NM_004420|1441	47	1850	DUSP8	NM_004420	1441	TAGAAGACGCACCGGGGAATAAGCTATGTCCTTAACGTTAATATTCATAGCGTTGAGGACGTAGCTTATTCCTTTTTTGGCAAGCAAAAGACGGCATACGAGATACGTGTCACAACACGTCATTCGCCGTCTTCGT
DUSP8|NM_004420|1442	48	1850	DUSP8	NM_004420	1442	TAGAAGACGCACCGGCCATCGAGTTCATTGATAAAGGTTAATATTCATAGCCTTTATCGATGAACTCGATGGTTTTTTGGCAAGCAAAAGACGGCATACGAGATGTGTGTCACAACACGTACTTCGCCGTCTTCGT
DUSP8|NM_004420|1443	49	1850	DUSP8	NM_004420	1443	TAGAAGACGCACCGGGAGTTCATCGATAAAGTCAAGGTTAATATTCATAGCCTTGGCTTTATCGATGAACTCTTTTTTGGCAAGCAAAAGACGGCATACGAGATTGGTGTCACAACACGTTGTTCGCCGTCTTCGT
E2F1|NM_005225|1444	50	1869	E2F1	NM_005225	1444	TAGAAGACGCACCGGGACCTCTTTGATTGTGACTTTGTTAATATTCATAGCAAAGTCACAGTCGAAGAGGTCTTTTTTGGCAAGCAAAAGACGGCATACGAGATACGTGTCACAACACCAGTTTCGCCGTCTTCGT
E2F1|NM_005225|1445	51	1869	E2F1	NM_005225	1445	TAGAAGACGCACCGGCATCCAGCTTATTGCTAAGAAGTTAATATTCATAGCTTCTTGGCAATGAGCTGGATGTTTTTTGGCAAGCAAAAGACGGCATACGAGATTGGTGTCACAACACCACATTCGCCGTCTTCGT
E2F1|NM_005225|1446	52	1869	E2F1	NM_005225	1446	TAGAAGACGCACCGGTAAGAGCAAATAAGGCCTGATGTTAATATTCATAGCATCGGGCCTTGTTTGCTCTTATTTTTTGGCAAGCAAAAGACGGCATACGAGATCAGTGTCACAACACCAACTTCGCCGTCTTCGT
E2F1|NM_005225|1447	53	1869	E2F1	NM_005225	1447	TAGAAGACGCACCGGACCTCTTTGATTGTGACTTTGGTTAATATTCATAGCCAAAGTCACAGTCGAAGAGGTTTTTTTGGCAAGCAAAAGACGGCATACGAGATGTGTGTCACAACACCATGTTCGCCGTCTTCGT
E2F1|NM_005225|1448	54	1869	E2F1	NM_005225	1448	TAGAAGACGCACCGGGACATCACTAACGTCTTTGAGGTTAATATTCATAGCCTCAAGGACGTTGGTGATGTCTTTTTTGGCAAGCAAAAGACGGCATACGAGATTGGTGTCACAACACACGTTTCGCCGTCTTCGT
E2F1|NM_005225|1449	55	1869	E2F1	NM_005225	1449	TAGAAGACGCACCGGCTACTCAGCTTGGAGTAAGAAGTTAATATTCATAGCTTCTTGCTCCAGGCTGAGTAGTTTTTTGGCAAGCAAAAGACGGCATACGAGATGTGTGTCACAACACACCATTCGCCGTCTTCGT
E2F1|NM_005225|1450	56	1869	E2F1	NM_005225	1450	TAGAAGACGCACCGGCGCTATGAGATCTCATTGAATGTTAATATTCATAGCATTCAGTGAGGTCTCATAGCGTTTTTTGGCAAGCAAAAGACGGCATACGAGATACGTGTCACAACACACACTTCGCCGTCTTCGT
E2F1|NM_005225|1451	57	1869	E2F1	NM_005225	1451	TAGAAGACGCACCGGCGTGGACTCTTTGGAGAATTTGTTAATATTCATAGCAAGTTCTCCGAAGAGTCCACGTTTTTTGGCAAGCAAAAGACGGCATACGAGATCAGTGTCACAACACACTGTTCGCCGTCTTCGT
E2F5|NM_001083588|1452	58	1875	E2F5	NM_001083588	1452	TAGAAGACGCACCGGCCGGTAGATGACTATAACTTTGTTAATATTCATAGCAAAGTTGTAGTCATCTGCCGGTTTTTTGGCAAGCAAAAGACGGCATACGAGATGTGTGTCACAACACTGGTTTCGCCGTCTTCGT
E2F5|NM_001083588|1453	59	1875	E2F5	NM_001083588	1453	TAGAAGACGCACCGGCCTATCCATGTGCTGTTTATAGTTAATATTCATAGCTATAAGCAGCACATGGATAGGTTTTTTGGCAAGCAAAAGACGGCATACGAGATCAGTGTCACAACACTGCATTCGCCGTCTTCGT
E2F5|NM_001083588|1454	60	1875	E2F5	NM_001083588	1454	TAGAAGACGCACCGGGCTGGCTGTAATATTAAAGAAGTTAATATTCATAGCTTCTTTAGTATTACAGCCAGCTTTTTTGGCAAGCAAAAGACGGCATACGAGATTGGTGTCACAACACTGACTTCGCCGTCTTCGT
E2F5|NM_001083588|1455	61	1875	E2F5	NM_001083588	1455	TAGAAGACGCACCGGGCAGACATCAGCTATAGATATGTTAATATTCATAGCATATCTGTAGCTGATGTCTGCTTTTTTGGCAAGCAAAAGACGGCATACGAGATACGTGTCACAACACTGTGTTCGCCGTCTTCGT
E2F5|NM_001083588|1456	62	1875	E2F5	NM_001083588	1456	TAGAAGACGCACCGGGGAGGTACTCATTCTAGAAATGTTAATATTCATAGCATTTCTGGAATGGGTACCTCCTTTTTTGGCAAGCAAAAGACGGCATACGAGATGTGTGTCACAACTGGTGTTTCGCCGTCTTCGT
E2F5|NM_001083588|1457	63	1875	E2F5	NM_001083588	1457	TAGAAGACGCACCGGGAAGTTGTGGTTACAGTAAAGGTTAATATTCATAGCCTTTGCTGTAGCCACAACTTCTTTTTTGGCAAGCAAAAGACGGCATACGAGATCAGTGTCACAACTGGTCATTCGCCGTCTTCGT
E2F5|NM_001083588|1458	64	1875	E2F5	NM_001083588	1458	TAGAAGACGCACCGGGTAGGTGCTGGTTGTAATATTGTTAATATTCATAGCAGTATTACAGCCAGCACCTACTTTTTTGGCAAGCAAAAGACGGCATACGAGATTGGTGTCACAACTGGTACTTCGCCGTCTTCGT
E2F5|NM_001083588|1459	65	1875	E2F5	NM_001083588	1459	TAGAAGACGCACCGGGGAGTTTGTGATTTGTTTGATGTTAATATTCATAGCATCAAACAGATCACAAACTCCTTTTTTGGCAAGCAAAAGACGGCATACGAGATACGTGTCACAACTGGTTGTTCGCCGTCTTCGT
S1PR1|NM_001400|1460	66	1901	S1PR1	NM_001400	1460	TAGAAGACGCACCGGGCTGCTCAAGACTGTAATTATGTTAATATTCATAGCATAATTACGGTCTTGAGCAGCTTTTTTGGCAAGCAAAAGACGGCATACGAGATCAGTGTCACAACTGCAGTTTCGCCGTCTTCGT
S1PR1|NM_001400|1461	67	1901	S1PR1	NM_001400	1461	TAGAAGACGCACCGGGCCGCAGTAAATCGGATAATTGTTAATATTCATAGCAATTGTCCGATTTGCTGCGGCTTTTTTGGCAAGCAAAAGACGGCATACGAGATACGTGTCACAACTGCACATTCGCCGTCTTCGT
S1PR1|NM_001400|1462	68	1901	S1PR1	NM_001400	1462	TAGAAGACGCACCGGATCGCCATTGAGCGTTATATTGTTAATATTCATAGCGATATAGCGCTCAATGGCGATTTTTTTGGCAAGCAAAAGACGGCATACGAGATGTGTGTCACAACTGCAACTTCGCCGTCTTCGT
S1PR1|NM_001400|1463	69	1901	S1PR1	NM_001400	1463	TAGAAGACGCACCGGGACAACCTAGAGACTATTATGGTTAATATTCATAGCCATAATGGTCTCTGGGTTGTCTTTTTTGGCAAGCAAAAGACGGCATACGAGATTGGTGTCACAACTGCATGTTCGCCGTCTTCGT
S1PR1|NM_001400|1464	70	1901	S1PR1	NM_001400	1464	TAGAAGACGCACCGGGCGCTGCTTAAGACTGTAATTGTTAATATTCATAGCAATTACGGTCTTGAGCAGCGCTTTTTTGGCAAGCAAAAGACGGCATACGAGATACGTGTCACAACTGACGTTTCGCCGTCTTCGT
S1PR1|NM_001400|1465	71	1901	S1PR1	NM_001400	1465	TAGAAGACGCACCGGTGGAATTCAGTCGCAGTAAATGTTAATATTCATAGCATTTGCTGCGGCTGAATTCCATTTTTTGGCAAGCAAAAGACGGCATACGAGATTGGTGTCACAACTGACCATTCGCCGTCTTCGT
S1PR1|NM_001400|1466	72	1901	S1PR1	NM_001400	1466	TAGAAGACGCACCGGCAAGGAGAACAGCATTAAATTGTTAATATTCATAGCAGTTTAATGCTGTTCTCCTTGTTTTTTGGCAAGCAAAAGACGGCATACGAGATCAGTGTCACAACTGACACTTCGCCGTCTTCGT
S1PR1|NM_001400|1467	73	1901	S1PR1	NM_001400	1467	TAGAAGACGCACCGGGCTCTACCACAAGCATTATATGTTAATATTCATAGCATATAGTGCTTGTGGTAGAGCTTTTTTGGCAAGCAAAAGACGGCATACGAGATGTGTGTCACAACTGACTGTTCGCCGTCTTCGT
AHCY|NM_000687|1468	74	191	AHCY	NM_000687	1468	TAGAAGACGCACCGGTCAAGGTGCTTGCCATTAATGGTTAATATTCATAGCCATTGATGGCAGGCACCTTGATTTTTTGGCAAGCAAAAGACGGCATACGAGATTGGTGTCACAACTGTGGTTTCGCCGTCTTCGT
AHCY|NM_000687|1469	75	191	AHCY	NM_000687	1469	TAGAAGACGCACCGGCCAGCTTTGTGATGAGTAATTGTTAATATTCATAGCAGTTACTCATCACGAAGCTGGTTTTTTGGCAAGCAAAAGACGGCATACGAGATGTGTGTCACAACTGTGCATTCGCCGTCTTCGT
AHCY|NM_000687|1470	76	191	AHCY	NM_000687	1470	TAGAAGACGCACCGGGTGGAGAAGGTGAATATTAAGGTTAATATTCATAGCCTTGATGTTCACCTTCTCCACTTTTTTGGCAAGCAAAAGACGGCATACGAGATACGTGTCACAACTGTGACTTCGCCGTCTTCGT
AHCY|NM_000687|1471	77	191	AHCY	NM_000687	1471	TAGAAGACGCACCGGGTTCATTTCTTGCCTAAGAAGGTTAATATTCATAGCCTTCTTGGGCAGGAAATGAACTTTTTTGGCAAGCAAAAGACGGCATACGAGATCAGTGTCACAACTGTGTGTTCGCCGTCTTCGT
AHCY|NM_000687|1472	78	191	AHCY	NM_000687	1472	TAGAAGACGCACCGGTGACAAACTGCCCTATAAAGTGTTAATATTCATAGCACTTTGTAGGGCAGTTTGTCATTTTTTGGCAAGCAAAAGACGGCATACGAGATGTGTGTCACATGGTGTGTTTCGCCGTCTTCGT
AHCY|NM_000687|1473	79	191	AHCY	NM_000687	1473	TAGAAGACGCACCGGACGTGGAGATTGATGTTAAGTGTTAATATTCATAGCACTTGACATCGATCTCCACGTTTTTTTGGCAAGCAAAAGACGGCATACGAGATCAGTGTCACATGGTGTCATTCGCCGTCTTCGT
AHCY|NM_000687|1474	80	191	AHCY	NM_000687	1474	TAGAAGACGCACCGGGATGCCATTGTGTGTAATATTGTTAATATTCATAGCAATGTTACACACAATGGCATCTTTTTTGGCAAGCAAAAGACGGCATACGAGATTGGTGTCACATGGTGTACTTCGCCGTCTTCGT
AHCY|NM_000687|1475	81	191	AHCY	NM_000687	1475	TAGAAGACGCACCGGTGGGTAAGTTGAATGTGAAGTGTTAATATTCATAGCACTTCACATTCAGCTTGCCCATTTTTTGGCAAGCAAAAGACGGCATACGAGATACGTGTCACATGGTGTTGTTCGCCGTCTTCGT
EEF2|NM_001961|1476	82	1938	EEF2	NM_001961	1476	TAGAAGACGCACCGGGCGATCATGAATTTCAAGAAAGTTAATATTCATAGCTTTCTTGAAATTCATGATCGCTTTTTTGGCAAGCAAAAGACGGCATACGAGATCAGTGTCACATGGTCAGTTTCGCCGTCTTCGT
EEF2|NM_001961|1477	83	1938	EEF2	NM_001961	1477	TAGAAGACGCACCGGCCAGAGAATAATCTTGATGATGTTAATATTCATAGCATCATCAAGATTGTTCTCTGGTTTTTTGGCAAGCAAAAGACGGCATACGAGATACGTGTCACATGGTCACATTCGCCGTCTTCGT
EEF2|NM_001961|1478	84	1938	EEF2	NM_001961	1478	TAGAAGACGCACCGGGCAGTACCTCAATGAGATTAAGTTAATATTCATAGCTTGATCTCGTTGAGGTACTGCTTTTTTGGCAAGCAAAAGACGGCATACGAGATGTGTGTCACATGGTCAACTTCGCCGTCTTCGT
EEF2|NM_001961|1479	85	1938	EEF2	NM_001961	1479	TAGAAGACGCACCGGGCCCTCTTATGATGTATATTTGTTAATATTCATAGCAAATATACATCATAAGAGGGCTTTTTTGGCAAGCAAAAGACGGCATACGAGATTGGTGTCACATGGTCATGTTCGCCGTCTTCGT
EEF2|NM_001961|1480	86	1938	EEF2	NM_001961	1480	TAGAAGACGCACCGGCTGGACAACTTTCTGGATAAAGTTAATATTCATAGCTTTGTCCAGGAAGTTGTCCAGTTTTTTGGCAAGCAAAAGACGGCATACGAGATACGTGTCACATGGTACGTTTCGCCGTCTTCGT
EEF2|NM_001961|1481	87	1938	EEF2	NM_001961	1481	TAGAAGACGCACCGGGAAGCCAATCCAGAGAATAATGTTAATATTCATAGCATTGTTCTCTGGATTGGCTTCTTTTTTGGCAAGCAAAAGACGGCATACGAGATTGGTGTCACATGGTACCATTCGCCGTCTTCGT
EEF2|NM_001961|1482	88	1938	EEF2	NM_001961	1482	TAGAAGACGCACCGGGGAGAACGTGAATGTCATTATGTTAATATTCATAGCATGATGACGTTCACGTTCTCCTTTTTTGGCAAGCAAAAGACGGCATACGAGATCAGTGTCACATGGTACACTTCGCCGTCTTCGT
EEF2|NM_001961|1483	89	1938	EEF2	NM_001961	1483	TAGAAGACGCACCGGTGTGCTGATGATGAATAAGATGTTAATATTCATAGCATCTTGTTCATCATCAGCACATTTTTTGGCAAGCAAAAGACGGCATACGAGATGTGTGTCACATGGTACTGTTCGCCGTCTTCGT
EFNA4|NM_005227|1484	90	1945	EFNA4	NM_005227	1484	TAGAAGACGCACCGGCCATGTTCAATTCTTAGAGAAGTTAATATTCATAGCTTCTCTGAGAATTGAACATGGTTTTTTGGCAAGCAAAAGACGGCATACGAGATTGGTGTCACATGGTTGGTTTCGCCGTCTTCGT
EFNA4|NM_005227|1485	91	1945	EFNA4	NM_005227	1485	TAGAAGACGCACCGGCTCAACGATTACCTAGATATTGTTAATATTCATAGCAATGTCTAGGTAATCGTTGAGTTTTTTGGCAAGCAAAAGACGGCATACGAGATGTGTGTCACATGGTTGCATTCGCCGTCTTCGT
EFNA4|NM_005227|1486	92	1945	EFNA4	NM_005227	1486	TAGAAGACGCACCGGTGGAGAGACTTACTATTACATGTTAATATTCATAGCATGTAGTAGTAAGTCTCTCCATTTTTTGGCAAGCAAAAGACGGCATACGAGATACGTGTCACATGGTTGACTTCGCCGTCTTCGT
EFNA4|NM_005227|1487	93	1945	EFNA4	NM_005227	1487	TAGAAGACGCACCGGCTCTTGCTATTACTGTTGCTTGTTAATATTCATAGCAAGCAGCAGTAATAGCAAGAGTTTTTTGGCAAGCAAAAGACGGCATACGAGATCAGTGTCACATGGTTGTGTTCGCCGTCTTCGT
EFNA4|NM_005227|1488	94	1945	EFNA4	NM_005227	1488	TAGAAGACGCACCGGAGTCTACTGGAACTCTAGTAAGTTAATATTCATAGCTTACTGGAGTTCCAGTAGACTTTTTTTGGCAAGCAAAAGACGGCATACGAGATTGGTGTCACATGCAGTGTTTCGCCGTCTTCGT
EFNA4|NM_005227|1489	95	1945	EFNA4	NM_005227	1489	TAGAAGACGCACCGGCCCTTGGCTTTGAGTTCTTATGTTAATATTCATAGCGTAAGAACTCAAAGCCGAGGGTTTTTTGGCAAGCAAAAGACGGCATACGAGATGTGTGTCACATGCAGTCATTCGCCGTCTTCGT
EFNA4|NM_005227|1490	96	1945	EFNA4	NM_005227	1490	TAGAAGACGCACCGGTGCCCTTTGGCTATGTTTAATGTTAATATTCATAGCATTGAACATGGCCAAAGGGCATTTTTTGGCAAGCAAAAGACGGCATACGAGATACGTGTCACATGCAGTACTTCGCCGTCTTCGT
EFNA4|NM_005227|1491	97	1945	EFNA4	NM_005227	1491	TAGAAGACGCACCGGGTAGTCTATTGGAACTCTAGTGTTAATATTCATAGCACTGGAGTTCCAGTAGACTACTTTTTTGGCAAGCAAAAGACGGCATACGAGATCAGTGTCACATGCAGTTGTTCGCCGTCTTCGT
EGF|NM_001178130|1492	98	1950	EGF	NM_001178130	1492	TAGAAGACGCACCGGCCACCACTATTCTGTAAGAAAGTTAATATTCATAGCTTTCTTACGGAATAGTGGTGGTTTTTTGGCAAGCAAAAGACGGCATACGAGATGTGTGTCACATGCACAGTTTCGCCGTCTTCGT
EGF|NM_001178130|1493	99	1950	EGF	NM_001178130	1493	TAGAAGACGCACCGGGAAGGTATTCTCGTAGGAAATGTTAATATTCATAGCATTTCCTGCGAGAGTACCTTCTTTTTTGGCAAGCAAAAGACGGCATACGAGATCAGTGTCACATGCACACATTCGCCGTCTTCGT
EGF|NM_001178130|1494	100	1950	EGF	NM_001178130	1494	TAGAAGACGCACCGGGCAAATTGAGGAAAGGAAATTGTTAATATTCATAGCAGTTTCCTTTCCTCAATTTGCTTTTTTGGCAAGCAAAAGACGGCATACGAGATTGGTGTCACATGCACAACTTCGCCGTCTTCGT
EGF|NM_001178130|1495	101	1950	EGF	NM_001178130	1495	TAGAAGACGCACCGGGACACAGAAGGAACTAATTATGTTAATATTCATAGCATAATTGGTTCCTTCTGTGTCTTTTTTGGCAAGCAAAAGACGGCATACGAGATACGTGTCACATGCACATGTTCGCCGTCTTCGT
EGF|NM_001178130|1496	102	1950	EGF	NM_001178130	1496	TAGAAGACGCACCGGGTGGATAGAGAGAGTTAATATGTTAATATTCATAGCATATTAGCTCTCTCTATCCACTTTTTTGGCAAGCAAAAGACGGCATACGAGATCAGTGTCACATGCAACGTTTCGCCGTCTTCGT
EGF|NM_001178130|1497	103	1950	EGF	NM_001178130	1497	TAGAAGACGCACCGGGGAGTGATTTAAATGGGAAATGTTAATATTCATAGCGTTTCCCATTTAAATCACTCCTTTTTTGGCAAGCAAAAGACGGCATACGAGATACGTGTCACATGCAACCATTCGCCGTCTTCGT
EGF|NM_001178130|1498	104	1950	EGF	NM_001178130	1498	TAGAAGACGCACCGGCAAGCAGTTTGTGATTGAAATGTTAATATTCATAGCATTTCAATCACAGACTGCTTGTTTTTTGGCAAGCAAAAGACGGCATACGAGATGTGTGTCACATGCAACACTTCGCCGTCTTCGT
EGF|NM_001178130|1499	105	1950	EGF	NM_001178130	1499	TAGAAGACGCACCGGGATGGAACAGACTATGGAATTGTTAATATTCATAGCAGTTCCATAGTCTGTTCCATCTTTTTTGGCAAGCAAAAGACGGCATACGAGATTGGTGTCACATGCAACTGTTCGCCGTCTTCGT
EGFR|NM_005228|1500	106	1956	EGFR	NM_005228	1500	TAGAAGACGCACCGGGCTGGATGGTAGACGTAGATAGTTAATATTCATAGCTATCTGCGTCTATCATCCAGCTTTTTTGGCAAGCAAAAGACGGCATACGAGATACGTGTCACATGCATGGTTTCGCCGTCTTCGT
EGFR|NM_005228|1501	107	1956	EGFR	NM_005228	1501	TAGAAGACGCACCGGGCCACAAAGTAGTGAATTTATGTTAATATTCATAGCATAAATTCACTGCTTTGTGGCTTTTTTGGCAAGCAAAAGACGGCATACGAGATTGGTGTCACATGCATGCATTCGCCGTCTTCGT
EGFR|NM_005228|1502	108	1956	EGFR	NM_005228	1502	TAGAAGACGCACCGGCCACCAAATTAGTCTGGATAAGTTAATATTCATAGCTTGTCCAGGCTAATTTGGTGGTTTTTTGGCAAGCAAAAGACGGCATACGAGATCAGTGTCACATGCATGACTTCGCCGTCTTCGT
EGFR|NM_005228|1503	109	1956	EGFR	NM_005228	1503	TAGAAGACGCACCGGGTCCGGGAACATAAAGATAATGTTAATATTCATAGCATTGTCTTTGTGTTCCCGGACTTTTTTGGCAAGCAAAAGACGGCATACGAGATGTGTGTCACATGCATGTGTTCGCCGTCTTCGT
EGFR|NM_005228|1504	110	1956	EGFR	NM_005228	1504	TAGAAGACGCACCGGCCTCCAGAGGATGTTTAATAAGTTAATATTCATAGCTTATTGAACATCCTCTGGAGGTTTTTTGGCAAGCAAAAGACGGCATACGAGATACGTGTCACATGACGTGTTTCGCCGTCTTCGT
EGFR|NM_005228|1505	111	1956	EGFR	NM_005228	1505	TAGAAGACGCACCGGCAGCATGTCAAGATCATAGATGTTAATATTCATAGCATCTGTGATCTTGACATGCTGTTTTTTGGCAAGCAAAAGACGGCATACGAGATTGGTGTCACATGACGTCATTCGCCGTCTTCGT
EGFR|NM_005228|1506	112	1956	EGFR	NM_005228	1506	TAGAAGACGCACCGGGTGGTTGGTTATGTCCTTATTGTTAATATTCATAGCAATGAGGACATAACCAGCCACTTTTTTGGCAAGCAAAAGACGGCATACGAGATCAGTGTCACATGACGTACTTCGCCGTCTTCGT
EGFR|NM_005228|1507	113	1956	EGFR	NM_005228	1507	TAGAAGACGCACCGGGGTCTTTGGGAATTTGGAAATGTTAATATTCATAGCATTTCCAAATTCCCAAGGACCTTTTTTGGCAAGCAAAAGACGGCATACGAGATGTGTGTCACATGACGTTGTTCGCCGTCTTCGT
EGR1|NM_001964|1508	114	1958	EGR1	NM_001964	1508	TAGAAGACGCACCGGCGACATTTGTGGAAGAAAGTTGTTAATATTCATAGCAACTTTCTTCCACAGATGTCGTTTTTTGGCAAGCAAAAGACGGCATACGAGATTGGTGTCACATGACCAGTTTCGCCGTCTTCGT
EGR1|NM_001964|1509	115	1958	EGR1	NM_001964	1509	TAGAAGACGCACCGGGCGATATTTGTGGAAGAAAGTGTTAATATTCATAGCACTTTCTTCCACAGATGTCGCTTTTTTGGCAAGCAAAAGACGGCATACGAGATGTGTGTCACATGACCACATTCGCCGTCTTCGT
EGR1|NM_001964|1510	116	1958	EGR1	NM_001964	1510	TAGAAGACGCACCGGATCTCTCTGAACAATGAGAAGGTTAATATTCATAGCCTTCTCGTTGTTCAGAGAGATTTTTTTGGCAAGCAAAAGACGGCATACGAGATACGTGTCACATGACCAACTTCGCCGTCTTCGT
EGR1|NM_001964|1511	117	1958	EGR1	NM_001964	1511	TAGAAGACGCACCGGACGACAGCAGTCCTATTTATTGTTAATATTCATAGCAGTAAATGGGACTGCTGTCGTTTTTTTGGCAAGCAAAAGACGGCATACGAGATCAGTGTCACATGACCATGTTCGCCGTCTTCGT
EGR1|NM_001964|1512	118	1958	EGR1	NM_001964	1512	TAGAAGACGCACCGGTACCAGTCCTAGCTCATTAAAGTTAATATTCATAGCTTTGATGAGCTGGGACTGGTATTTTTTGGCAAGCAAAAGACGGCATACGAGATGTGTGTCACATGACACGTTTCGCCGTCTTCGT
EGR1|NM_001964|1513	119	1958	EGR1	NM_001964	1513	TAGAAGACGCACCGGTTCTCCCAGGATAATTGAAATGTTAATATTCATAGCATTTCAATTGTCCTGGGAGAATTTTTTGGCAAGCAAAAGACGGCATACGAGATCAGTGTCACATGACACCATTCGCCGTCTTCGT
EGR1|NM_001964|1514	120	1958	EGR1	NM_001964	1514	TAGAAGACGCACCGGTGCGATATTTGTGGAAGAAAGGTTAATATTCATAGCCTTTCTTCCACAGATGTCGCATTTTTTGGCAAGCAAAAGACGGCATACGAGATTGGTGTCACATGACACACTTCGCCGTCTTCGT
EGR1|NM_001964|1515	121	1958	EGR1	NM_001964	1515	TAGAAGACGCACCGGTTGCGGTAGAAGGATAAGAAAGTTAATATTCATAGCTTTCTTGTCCTTCTGCCGCAATTTTTTGGCAAGCAAAAGACGGCATACGAGATACGTGTCACATGACACTGTTCGCCGTCTTCGT
AHR|NM_001621|1516	122	196	AHR	NM_001621	1516	TAGAAGACGCACCGGGCTTCTTTGATGTTGCATTAAGTTAATATTCATAGCTTAATGCAACATCAAAGAAGCTTTTTTGGCAAGCAAAAGACGGCATACGAGATCAGTGTCACATGACTGGTTTCGCCGTCTTCGT
AHR|NM_001621|1517	123	196	AHR	NM_001621	1517	TAGAAGACGCACCGGCGGCATAGAGATCGATTTAATGTTAATATTCATAGCATTAAGTCGGTCTCTATGCCGTTTTTTGGCAAGCAAAAGACGGCATACGAGATACGTGTCACATGACTGCATTCGCCGTCTTCGT
AHR|NM_001621|1518	124	196	AHR	NM_001621	1518	TAGAAGACGCACCGGGCGGTATAGAGACCGATTTAAGTTAATATTCATAGCTTAAGTCGGTCTCTATGCCGCTTTTTTGGCAAGCAAAAGACGGCATACGAGATGTGTGTCACATGACTGACTTCGCCGTCTTCGT
AHR|NM_001621|1519	125	196	AHR	NM_001621	1519	TAGAAGACGCACCGGAGTCCCATATCTGAATGATTAGTTAATATTCATAGCTAATCATTCGGATATGGGACTTTTTTTGGCAAGCAAAAGACGGCATACGAGATTGGTGTCACATGACTGTGTTCGCCGTCTTCGT
AHR|NM_001621|1520	126	196	AHR	NM_001621	1520	TAGAAGACGCACCGGGCAACAAGATGAGTCTATTTAGTTAATATTCATAGCTAAATAGACTCATCTTGTTGCTTTTTTGGCAAGCAAAAGACGGCATACGAGATCAGTGTCACATGTGGTGTTTCGCCGTCTTCGT
AHR|NM_001621|1521	127	196	AHR	NM_001621	1521	TAGAAGACGCACCGGATCCACAGTCAGCTATAATAAGTTAATATTCATAGCTTATTATGGCTGACTGTGGATTTTTTTGGCAAGCAAAAGACGGCATACGAGATACGTGTCACATGTGGTCATTCGCCGTCTTCGT
AHR|NM_001621|1522	128	196	AHR	NM_001621	1522	TAGAAGACGCACCGGGCAACAGTTGTGTTAGAAGATGTTAATATTCATAGCATCTTCTGACACAGCTGTTGCTTTTTTGGCAAGCAAAAGACGGCATACGAGATGTGTGTCACATGTGGTACTTCGCCGTCTTCGT
AHR|NM_001621|1523	129	196	AHR	NM_001621	1523	TAGAAGACGCACCGGGCTGCTATGATGCAATAAGATGTTAATATTCATAGCATCTTGTTGCATCATGGCAGCTTTTTTGGCAAGCAAAAGACGGCATACGAGATTGGTGTCACATGTGGTTGTTCGCCGTCTTCGT
EIF1AX|NM_001412|1524	130	1964	EIF1AX	NM_001412	1524	TAGAAGACGCACCGGCCGAGACTACTAGGATAATAAGTTAATATTCATAGCTTGTTATCCTGGTAGTCTCGGTTTTTTGGCAAGCAAAAGACGGCATACGAGATACGTGTCACATGTGCAGTTTCGCCGTCTTCGT
EIF1AX|NM_001412|1525	131	1964	EIF1AX	NM_001412	1525	TAGAAGACGCACCGGGACGGTTAGAAGTAATGTGTTGTTAATATTCATAGCAACACATTGCTTCTAGCCGTCTTTTTTGGCAAGCAAAAGACGGCATACGAGATTGGTGTCACATGTGCACATTCGCCGTCTTCGT
EIF1AX|NM_001412|1526	132	1964	EIF1AX	NM_001412	1526	TAGAAGACGCACCGGGTTATGTCACATTAGAGGAAAGTTAATATTCATAGCTTTCCTCTGATGTGACATAACTTTTTTGGCAAGCAAAAGACGGCATACGAGATCAGTGTCACATGTGCAACTTCGCCGTCTTCGT
EIF1AX|NM_001412|1527	133	1964	EIF1AX	NM_001412	1527	TAGAAGACGCACCGGCCTGGAGATGATGGTGAAGTTGTTAATATTCATAGCAATTTCATCATCATCTCCAGGTTTTTTGGCAAGCAAAAGACGGCATACGAGATGTGTGTCACATGTGCATGTTCGCCGTCTTCGT
EIF1AX|NM_001412|1528	134	1964	EIF1AX	NM_001412	1528	TAGAAGACGCACCGGGAGACTACCAGGATAATAAAGGTTAATATTCATAGCCTTTGTTATCCTGGTAGTCTCTTTTTTGGCAAGCAAAAGACGGCATACGAGATTGGTGTCACATGTGACGTTTCGCCGTCTTCGT
EIF1AX|NM_001412|1529	135	1964	EIF1AX	NM_001412	1529	TAGAAGACGCACCGGGATGATATTGGAGATGATGATGTTAATATTCATAGCATCATCATCTCCAATGTCATCTTTTTTGGCAAGCAAAAGACGGCATACGAGATGTGTGTCACATGTGACCATTCGCCGTCTTCGT
EIF1AX|NM_001412|1530	136	1964	EIF1AX	NM_001412	1530	TAGAAGACGCACCGGTCAGGAGTATGCTTAGGTAATGTTAATATTCATAGCATTACCTGAGCATACTCCTGATTTTTTGGCAAGCAAAAGACGGCATACGAGATACGTGTCACATGTGACACTTCGCCGTCTTCGT
EIF1AX|NM_001412|1531	137	1964	EIF1AX	NM_001412	1531	TAGAAGACGCACCGGAAATGGACGGCTAGAAGTAATGTTAATATTCATAGCATTGCTTCTAGCCGTCCATTTTTTTTTGGCAAGCAAAAGACGGCATACGAGATCAGTGTCACATGTGACTGTTCGCCGTCTTCGT
EIF2S1|NM_004094|1532	138	1965	EIF2S1	NM_004094	1532	TAGAAGACGCACCGGCGTATCCGTTCTATCAATAAAGTTAATATTCATAGCTTTGTTGATAGAACGGATACGTTTTTTGGCAAGCAAAAGACGGCATACGAGATGTGTGTCACATGTGTGGTTTCGCCGTCTTCGT
EIF2S1|NM_004094|1533	139	1965	EIF2S1	NM_004094	1533	TAGAAGACGCACCGGCTGGAATACAACAACATTGAAGTTAATATTCATAGCTTCAATGTTGTTGTATTCCAGTTTTTTGGCAAGCAAAAGACGGCATACGAGATCAGTGTCACATGTGTGCATTCGCCGTCTTCGT
EIF2S1|NM_004094|1534	140	1965	EIF2S1	NM_004094	1534	TAGAAGACGCACCGGGCAGTCTTAGACCCATTTATTGTTAATATTCATAGCAATAGATGGGTCTGAGACTGCTTTTTTGGCAAGCAAAAGACGGCATACGAGATTGGTGTCACATGTGTGACTTCGCCGTCTTCGT
EIF2S1|NM_004094|1535	141	1965	EIF2S1	NM_004094	1535	TAGAAGACGCACCGGTATGGTGCCTATGATGTATTTGTTAATATTCATAGCAAATGCATCATAGGCACCATATTTTTTGGCAAGCAAAAGACGGCATACGAGATACGTGTCACATGTGTGTGTTCGCCGTCTTCGT
EIF2S1|NM_004094|1536	142	1965	EIF2S1	NM_004094	1536	TAGAAGACGCACCGGATGAACGGGAAGTACTTATTAGTTAATATTCATAGCTAATGAGTACTTCCCGTTCATTTTTTTGGCAAGCAAAAGACGGCATACGAGATGTGTGTCAACGTGTGTGTTTCGCCGTCTTCGT
EIF2S1|NM_004094|1537	143	1965	EIF2S1	NM_004094	1537	TAGAAGACGCACCGGGCCCATTAAGATTAATCTAATGTTAATATTCATAGCATTAGATTAATCTTAATGGGCTTTTTTGGCAAGCAAAAGACGGCATACGAGATCAGTGTCAACGTGTGTCATTCGCCGTCTTCGT
EIF2S1|NM_004094|1538	144	1965	EIF2S1	NM_004094	1538	TAGAAGACGCACCGGGAAGATGTAGTGGTGGTGGATGTTAATATTCATAGCATTCACCATCACTACATCTTCTTTTTTGGCAAGCAAAAGACGGCATACGAGATTGGTGTCAACGTGTGTACTTCGCCGTCTTCGT
EIF2S1|NM_004094|1539	145	1965	EIF2S1	NM_004094	1539	TAGAAGACGCACCGGAGCTTCTCCTTGGTATGTAATGTTAATATTCATAGCATTACATACCGAGGAGGAGCTTTTTTTGGCAAGCAAAAGACGGCATACGAGATACGTGTCAACGTGTGTTGTTCGCCGTCTTCGT
ADCY4|NM_001198568|1540	146	196883	ADCY4	NM_001198568	1540	TAGAAGACGCACCGGGCCAGAGAGCACTAATAATTTGTTAATATTCATAGCAAATTGTTAGTGCTCTCTGGCTTTTTTGGCAAGCAAAAGACGGCATACGAGATCAGTGTCAACGTGTCAGTTTCGCCGTCTTCGT
ADCY4|NM_001198568|1541	147	196883	ADCY4	NM_001198568	1541	TAGAAGACGCACCGGGAGGCTGCTTAATGAGATAATGTTAATATTCATAGCATTATCTCATTGAGCAGCCTCTTTTTTGGCAAGCAAAAGACGGCATACGAGATACGTGTCAACGTGTCACATTCGCCGTCTTCGT
ADCY4|NM_001198568|1542	148	196883	ADCY4	NM_001198568	1542	TAGAAGACGCACCGGGTTCTACTCTGAATCTAACATGTTAATATTCATAGCATGTTGGATTCAGAGTAGAACTTTTTTGGCAAGCAAAAGACGGCATACGAGATGTGTGTCAACGTGTCAACTTCGCCGTCTTCGT
ADCY4|NM_001198568|1543	149	196883	ADCY4	NM_001198568	1543	TAGAAGACGCACCGGTGAATGCATGCGGATTAAGATGTTAATATTCATAGCATCTTGATCCGCATGCATTCATTTTTTGGCAAGCAAAAGACGGCATACGAGATTGGTGTCAACGTGTCATGTTCGCCGTCTTCGT
ADCY4|NM_001198568|1544	150	196883	ADCY4	NM_001198568	1544	TAGAAGACGCACCGGGTACTTTAGAGAGAAGGAGATGTTAATATTCATAGCATCTCCTTCTCTCTGAAGTACTTTTTTGGCAAGCAAAAGACGGCATACGAGATACGTGTCAACGTGTACGTTTCGCCGTCTTCGT
ADCY4|NM_001198568|1545	151	196883	ADCY4	NM_001198568	1545	TAGAAGACGCACCGGTCTACCACCAGTCTTATGAATGTTAATATTCATAGCATTCATAGGACTGGTGGTAGATTTTTTGGCAAGCAAAAGACGGCATACGAGATTGGTGTCAACGTGTACCATTCGCCGTCTTCGT
ADCY4|NM_001198568|1546	152	196883	ADCY4	NM_001198568	1546	TAGAAGACGCACCGGGGACTTCTTGTGGAAGAAGAGGTTAATATTCATAGCTTCTTCTTCCACAGGAAGTCCTTTTTTGGCAAGCAAAAGACGGCATACGAGATCAGTGTCAACGTGTACACTTCGCCGTCTTCGT
ADCY4|NM_001198568|1547	153	196883	ADCY4	NM_001198568	1547	TAGAAGACGCACCGGGGCCAGAGAGTACTAATAATTGTTAATATTCATAGCAATTGTTAGTGCTCTCTGGCCTTTTTTGGCAAGCAAAAGACGGCATACGAGATGTGTGTCAACGTGTACTGTTCGCCGTCTTCGT
EIF4E|NM_001130678|1548	154	1977	EIF4E	NM_001130678	1548	TAGAAGACGCACCGGCCAAAGATAGTGATTGGTTATGTTAATATTCATAGCATAACCAATCACTATCTTTGGTTTTTTGGCAAGCAAAAGACGGCATACGAGATTGGTGTCAACGTGTTGGTTTCGCCGTCTTCGT
EIF4E|NM_001130678|1549	155	1977	EIF4E	NM_001130678	1549	TAGAAGACGCACCGGCCGATTATAGAAGAGGAGAAAGTTAATATTCATAGCTTTCTCCTCTTCTGTAGTCGGTTTTTTGGCAAGCAAAAGACGGCATACGAGATGTGTGTCAACGTGTTGCATTCGCCGTCTTCGT
EIF4E|NM_001130678|1550	156	1977	EIF4E	NM_001130678	1550	TAGAAGACGCACCGGCGGCTGATTTCTAAGTTTGATGTTAATATTCATAGCATCAAACTTGGAGATCAGCCGTTTTTTGGCAAGCAAAAGACGGCATACGAGATACGTGTCAACGTGTTGACTTCGCCGTCTTCGT
EIF4E|NM_001130678|1551	157	1977	EIF4E	NM_001130678	1551	TAGAAGACGCACCGGGAGGACGATGGCTAATTATATGTTAATATTCATAGCATGTAATTAGCCATCGTCCTCTTTTTTGGCAAGCAAAAGACGGCATACGAGATCAGTGTCAACGTGTTGTGTTCGCCGTCTTCGT
EIF4E|NM_001130678|1552	158	1977	EIF4E	NM_001130678	1552	TAGAAGACGCACCGGGTTAGGACTTCCTCTAAAGATGTTAATATTCATAGCATCTTTGGAGGAAGTCCTAACTTTTTTGGCAAGCAAAAGACGGCATACGAGATTGGTGTCAACGTCAGTGTTTCGCCGTCTTCGT
EIF4E|NM_001130678|1553	159	1977	EIF4E	NM_001130678	1553	TAGAAGACGCACCGGGAGACACTTCTGTGCTTTATTGTTAATATTCATAGCAATAAGGCACAGAAGTGTCTCTTTTTTGGCAAGCAAAAGACGGCATACGAGATGTGTGTCAACGTCAGTCATTCGCCGTCTTCGT
EIF4E|NM_001130678|1554	160	1977	EIF4E	NM_001130678	1554	TAGAAGACGCACCGGTTGGGCTCTGTACAACTATATGTTAATATTCATAGCATATGGTTGTACAGAGCCCAATTTTTTGGCAAGCAAAAGACGGCATACGAGATACGTGTCAACGTCAGTACTTCGCCGTCTTCGT
EIF4E|NM_001130678|1555	161	1977	EIF4E	NM_001130678	1555	TAGAAGACGCACCGGGTATGTGGCGTTGTTGTTAATGTTAATATTCATAGCATTAACAACAGCGCCACATACTTTTTTGGCAAGCAAAAGACGGCATACGAGATCAGTGTCAACGTCAGTTGTTCGCCGTCTTCGT
EIF4EBP1|NM_004095|1556	162	1978	EIF4EBP1	NM_004095	1556	TAGAAGACGCACCGGACAGTTTGAGATGGACATTTAGTTAATATTCATAGCTAAATGTCCATCTCAAACTGTTTTTTTGGCAAGCAAAAGACGGCATACGAGATGTGTGTCAACGTCACAGTTTCGCCGTCTTCGT
EIF4EBP1|NM_004095|1557	163	1978	EIF4EBP1	NM_004095	1557	TAGAAGACGCACCGGCGGTGAAGAGTCATAGTTTGGGTTAATATTCATAGCTCAAACTGTGACTCTTCACCGTTTTTTGGCAAGCAAAAGACGGCATACGAGATCAGTGTCAACGTCACACATTCGCCGTCTTCGT
EIF4EBP1|NM_004095|1558	164	1978	EIF4EBP1	NM_004095	1558	TAGAAGACGCACCGGGCGCAATAGCCTAGAAGATAGGTTAATATTCATAGCTTATCTTCTGGGCTATTGCGCTTTTTTGGCAAGCAAAAGACGGCATACGAGATTGGTGTCAACGTCACAACTTCGCCGTCTTCGT
EIF4EBP1|NM_004095|1559	165	1978	EIF4EBP1	NM_004095	1559	TAGAAGACGCACCGGGGATCATCTATGACTGGAAATGTTAATATTCATAGCATTTCCGGTCATAGATGATCCTTTTTTGGCAAGCAAAAGACGGCATACGAGATACGTGTCAACGTCACATGTTCGCCGTCTTCGT
EIF4EBP1|NM_004095|1560	166	1978	EIF4EBP1	NM_004095	1560	TAGAAGACGCACCGGGCAATAGCCTAGAAGATAAGTGTTAATATTCATAGCGCTTATCTTCTGGGCTATTGCTTTTTTGGCAAGCAAAAGACGGCATACGAGATCAGTGTCAACGTCAACGTTTCGCCGTCTTCGT
EIF4EBP1|NM_004095|1561	167	1978	EIF4EBP1	NM_004095	1561	TAGAAGACGCACCGGGATCATCTATGACTGGAAATTGTTAATATTCATAGCAATTTCCGGTCATAGATGATCTTTTTTGGCAAGCAAAAGACGGCATACGAGATACGTGTCAACGTCAACCATTCGCCGTCTTCGT
EIF4EBP1|NM_004095|1562	168	1978	EIF4EBP1	NM_004095	1562	TAGAAGACGCACCGGGAAGAGTCATAGTTTGAGATGGTTAATATTCATAGCCATCTCAAACTGTGACTCTTCTTTTTTGGCAAGCAAAAGACGGCATACGAGATGTGTGTCAACGTCAACACTTCGCCGTCTTCGT
EIF4EBP1|NM_004095|1563	169	1978	EIF4EBP1	NM_004095	1563	TAGAAGACGCACCGGACCGGAAATTCTTGATGGGGTGTTAATATTCATAGCACTCCATCAGGAATTTCCGGTTTTTTTGGCAAGCAAAAGACGGCATACGAGATTGGTGTCAACGTCAACTGTTCGCCGTCTTCGT
EIF4G2|NM_001042559|1564	170	1982	EIF4G2	NM_001042559	1564	TAGAAGACGCACCGGGTGCTCTTTGATGTTAAGTAAGTTAATATTCATAGCTTACTTAACATCAAGGAGCACTTTTTTGGCAAGCAAAAGACGGCATACGAGATACGTGTCAACGTCATGGTTTCGCCGTCTTCGT
EIF4G2|NM_001042559|1565	171	1982	EIF4G2	NM_001042559	1565	TAGAAGACGCACCGGCCCTTTGGTGAAATCTTATTTGTTAATATTCATAGCAAATAGGATTTCACCAAAGGGTTTTTTGGCAAGCAAAAGACGGCATACGAGATTGGTGTCAACGTCATGCATTCGCCGTCTTCGT
EIF4G2|NM_001042559|1566	172	1982	EIF4G2	NM_001042559	1566	TAGAAGACGCACCGGATGGACCAAAGACGATTAATCGTTAATATTCATAGCGATTGATCGTCTTTGGTCCATTTTTTTGGCAAGCAAAAGACGGCATACGAGATCAGTGTCAACGTCATGACTTCGCCGTCTTCGT
EIF4G2|NM_001042559|1567	173	1982	EIF4G2	NM_001042559	1567	TAGAAGACGCACCGGATGGGACGTCATCGTTTAAATGTTAATATTCATAGCATTTGAACGATGACGTCCCATTTTTTTGGCAAGCAAAAGACGGCATACGAGATGTGTGTCAACGTCATGTGTTCGCCGTCTTCGT
EIF4G2|NM_001042559|1568	174	1982	EIF4G2	NM_001042559	1568	TAGAAGACGCACCGGGACGCCTCCTAATTTCTAAATGTTAATATTCATAGCATTTGGAAATTAGGAGGCGTCTTTTTTGGCAAGCAAAAGACGGCATACGAGATACGTGTCAACGTACGTGTTTCGCCGTCTTCGT
EIF4G2|NM_001042559|1569	175	1982	EIF4G2	NM_001042559	1569	TAGAAGACGCACCGGGGAGTGCTTCTGTTAGATAATGTTAATATTCATAGCATTATCTGACAGAGGCACTCCTTTTTTGGCAAGCAAAAGACGGCATACGAGATTGGTGTCAACGTACGTCATTCGCCGTCTTCGT
EIF4G2|NM_001042559|1570	176	1982	EIF4G2	NM_001042559	1570	TAGAAGACGCACCGGGAAGGAACTGTTGAAGTAAATGTTAATATTCATAGCATTTGCTTCAACAGTTCCTTCTTTTTTGGCAAGCAAAAGACGGCATACGAGATCAGTGTCAACGTACGTACTTCGCCGTCTTCGT
EIF4G2|NM_001042559|1571	177	1982	EIF4G2	NM_001042559	1571	TAGAAGACGCACCGGGATCAAGATGTTGGGAAATATGTTAATATTCATAGCATGTTTCCCAACATCTTGATCTTTTTTGGCAAGCAAAAGACGGCATACGAGATGTGTGTCAACGTACGTTGTTCGCCGTCTTCGT
ELANE|NM_001972|1572	178	1991	ELANE	NM_001972	1572	TAGAAGACGCACCGGGGATCGACTTTATCATCTAACGTTAATATTCATAGCGTTGGATGATAGAGTCGATCCTTTTTTGGCAAGCAAAAGACGGCATACGAGATTGGTGTCAACGTACCAGTTTCGCCGTCTTCGT
ELANE|NM_001972|1573	179	1991	ELANE	NM_001972	1573	TAGAAGACGCACCGGATCGTGATTCTTCAGCTTAACGTTAATATTCATAGCGTTGAGCTGGAGAATCACGATTTTTTTGGCAAGCAAAAGACGGCATACGAGATGTGTGTCAACGTACCACATTCGCCGTCTTCGT
ELANE|NM_001972|1574	180	1991	ELANE	NM_001972	1574	TAGAAGACGCACCGGGATCGACTCTATTATCCAATGGTTAATATTCATAGCCGTTGGATGATAGAGTCGATCTTTTTTGGCAAGCAAAAGACGGCATACGAGATACGTGTCAACGTACCAACTTCGCCGTCTTCGT
ELANE|NM_001972|1575	181	1991	ELANE	NM_001972	1575	TAGAAGACGCACCGGGTAAACTTGCTCAACGATATCGTTAATATTCATAGCGATGTCGTTGAGCAAGTTTACTTTTTTGGCAAGCAAAAGACGGCATACGAGATCAGTGTCAACGTACCATGTTCGCCGTCTTCGT
ELANE|NM_001972|1576	182	1991	ELANE	NM_001972	1576	TAGAAGACGCACCGGGCACAGTTTGTAAATTGGATCGTTAATATTCATAGCGATCCAGTTTACAAACTGTGCTTTTTTGGCAAGCAAAAGACGGCATACGAGATGTGTGTCAACGTACACGTTTCGCCGTCTTCGT
ELANE|NM_001972|1577	183	1991	ELANE	NM_001972	1577	TAGAAGACGCACCGGTGTAAACTGGATCGACTTTATGTTAATATTCATAGCATAGAGTCGATCCAGTTTACATTTTTTGGCAAGCAAAAGACGGCATACGAGATCAGTGTCAACGTACACCATTCGCCGTCTTCGT
ELANE|NM_001972|1578	184	1991	ELANE	NM_001972	1578	TAGAAGACGCACCGGCAACGGGTTAATCCATGGAATGTTAATATTCATAGCATTCCGTGGATTAGCCCGTTGTTTTTTGGCAAGCAAAAGACGGCATACGAGATTGGTGTCAACGTACACACTTCGCCGTCTTCGT
ELANE|NM_001972|1579	185	1991	ELANE	NM_001972	1579	TAGAAGACGCACCGGGCAACGGGTTAATCCATGGAAGTTAATATTCATAGCTTCCGTGGATTAGCCCGTTGCTTTTTTGGCAAGCAAAAGACGGCATACGAGATACGTGTCAACGTACACTGTTCGCCGTCTTCGT
ELAVL2|NM_001171195|1580	186	1993	ELAVL2	NM_001171195	1580	TAGAAGACGCACCGGCCGTGACTTTAACACTAATAAGTTAATATTCATAGCTTATTGGTGTTAAAGTCACGGTTTTTTGGCAAGCAAAAGACGGCATACGAGATCAGTGTCAACGTACTGGTTTCGCCGTCTTCGT
ELAVL2|NM_001171195|1581	187	1993	ELAVL2	NM_001171195	1581	TAGAAGACGCACCGGGTCTCCTTTAAGACAAACAAAGTTAATATTCATAGCTTTGTTTGTCTTAAAGGAGACTTTTTTGGCAAGCAAAAGACGGCATACGAGATACGTGTCAACGTACTGCATTCGCCGTCTTCGT
ELAVL2|NM_001171195|1582	188	1993	ELAVL2	NM_001171195	1582	TAGAAGACGCACCGGGCTTCTATCAGAGATGTAAATGTTAATATTCATAGCATTTGCATCTCTGATAGAAGCTTTTTTGGCAAGCAAAAGACGGCATACGAGATGTGTGTCAACGTACTGACTTCGCCGTCTTCGT
ELAVL2|NM_001171195|1583	189	1993	ELAVL2	NM_001171195	1583	TAGAAGACGCACCGGGAAGCTATCAAAGGCTTAAATGTTAATATTCATAGCATTTAGGCCTTTGATAGCTTCTTTTTTGGCAAGCAAAAGACGGCATACGAGATTGGTGTCAACGTACTGTGTTCGCCGTCTTCGT
ELAVL2|NM_001171195|1584	190	1993	ELAVL2	NM_001171195	1584	TAGAAGACGCACCGGATGGCGATAGTTAGCCTTAATGTTAATATTCATAGCATTGAGGCTAGCTATCGCCATTTTTTTGGCAAGCAAAAGACGGCATACGAGATCAGTGTCAACGTTGGTGTTTCGCCGTCTTCGT
ELAVL2|NM_001171195|1585	191	1993	ELAVL2	NM_001171195	1585	TAGAAGACGCACCGGGTACCAGTTTCCAAATAGAAGGTTAATATTCATAGCCTTCTGTTTGGAGACTGGTACTTTTTTGGCAAGCAAAAGACGGCATACGAGATACGTGTCAACGTTGGTCATTCGCCGTCTTCGT
ELAVL2|NM_001171195|1586	192	1993	ELAVL2	NM_001171195	1586	TAGAAGACGCACCGGAGACAGCAAGACCAATTTAATGTTAATATTCATAGCATTAAGTTGGTCTTGCTGTCTTTTTTTGGCAAGCAAAAGACGGCATACGAGATGTGTGTCAACGTTGGTACTTCGCCGTCTTCGT
ELAVL2|NM_001171195|1587	193	1993	ELAVL2	NM_001171195	1587	TAGAAGACGCACCGGAATGACCAGTTTGGTTGGAATGTTAATATTCATAGCATTCCAGCCAAACTGGTCATTTTTTTTGGCAAGCAAAAGACGGCATACGAGATTGGTGTCAACGTTGGTTGTTCGCCGTCTTCGT
ELF2|NM_006874|1588	194	1998	ELF2	NM_006874	1588	TAGAAGACGCACCGGGCTTTGAGATACTACTATCAAGTTAATATTCATAGCTTGGTAGTAGTATCTCAAAGCTTTTTTGGCAAGCAAAAGACGGCATACGAGATACGTGTCAACGTTGCAGTTTCGCCGTCTTCGT
ELF2|NM_006874|1589	195	1998	ELF2	NM_006874	1589	TAGAAGACGCACCGGGTACACCTGTAATGAGATTATGTTAATATTCATAGCATAGTCTCATTACAGGTGTACTTTTTTGGCAAGCAAAAGACGGCATACGAGATTGGTGTCAACGTTGCACATTCGCCGTCTTCGT
ELF2|NM_006874|1590	196	1998	ELF2	NM_006874	1590	TAGAAGACGCACCGGACCTGTTGTAATGACATCATTGTTAATATTCATAGCAATGATGTCATTACAACAGGTTTTTTTGGCAAGCAAAAGACGGCATACGAGATCAGTGTCAACGTTGCAACTTCGCCGTCTTCGT
ELF2|NM_006874|1591	197	1998	ELF2	NM_006874	1591	TAGAAGACGCACCGGGTCTCTTGAGTTAGGTATAAAGTTAATATTCATAGCTTTATACCTAACTCAGGAGACTTTTTTGGCAAGCAAAAGACGGCATACGAGATGTGTGTCAACGTTGCATGTTCGCCGTCTTCGT
ELF2|NM_006874|1592	198	1998	ELF2	NM_006874	1592	TAGAAGACGCACCGGATGCAGGTGCACTATTAATAAGTTAATATTCATAGCTTATTAATGGTGCACCTGCATTTTTTTGGCAAGCAAAAGACGGCATACGAGATTGGTGTCAACGTTGACGTTTCGCCGTCTTCGT
ELF2|NM_006874|1593	199	1998	ELF2	NM_006874	1593	TAGAAGACGCACCGGGTGGCAGTTCAGTTAGTTAATGTTAATATTCATAGCATTAACTGACTGAACTGCCACTTTTTTGGCAAGCAAAAGACGGCATACGAGATGTGTGTCAACGTTGACCATTCGCCGTCTTCGT
ELF2|NM_006874|1594	200	1998	ELF2	NM_006874	1594	TAGAAGACGCACCGGGTGTCATTGTCTGTAGAAAGTGTTAATATTCATAGCACTTTCTGCAGACAGTGACACTTTTTTGGCAAGCAAAAGACGGCATACGAGATACGTGTCAACGTTGACACTTCGCCGTCTTCGT
ELF2|NM_006874|1595	201	1998	ELF2	NM_006874	1595	TAGAAGACGCACCGGGGTTGATAGTGGAGGTATTATGTTAATATTCATAGCATAGTACCTCCACTGTCAACCTTTTTTGGCAAGCAAAAGACGGCATACGAGATCAGTGTCAACGTTGACTGTTCGCCGTCTTCGT
A2M|NM_000014|1596	202	2	A2M	NM_000014	1596	TAGAAGACGCACCGGCCAGGCATATTATATTCTGAAGTTAATATTCATAGCTTCAGAATATAATGTGCCTGGTTTTTTGGCAAGCAAAAGACGGCATACGAGATGTGTGTCAACGTTGTGGTTTCGCCGTCTTCGT
A2M|NM_000014|1597	203	2	A2M	NM_000014	1597	TAGAAGACGCACCGGCCTAACATCTATGTATTGGATGTTAATATTCATAGCATCCAGTACATAGATGTTAGGTTTTTTGGCAAGCAAAAGACGGCATACGAGATCAGTGTCAACGTTGTGCATTCGCCGTCTTCGT
A2M|NM_000014|1598	204	2	A2M	NM_000014	1598	TAGAAGACGCACCGGAGACTGCATCAATCGTTATAAGTTAATATTCATAGCTTATGACGATTGATGCAGTCTTTTTTTGGCAAGCAAAAGACGGCATACGAGATTGGTGTCAACGTTGTGACTTCGCCGTCTTCGT
A2M|NM_000014|1599	205	2	A2M	NM_000014	1599	TAGAAGACGCACCGGCTCTTACTGTTAGGGTTAATTGTTAATATTCATAGCAATTGACCCTAACAGTAAGAGTTTTTTGGCAAGCAAAAGACGGCATACGAGATACGTGTCAACGTTGTGTGTTCGCCGTCTTCGT
A2M|NM_000014|1600	206	2	A2M	NM_000014	1600	TAGAAGACGCACCGGAGTGACCCTTTCCGCTTATATGTTAATATTCATAGCATATAGGCGGAGAGGGTCACTTTTTTTGGCAAGCAAAAGACGGCATACGAGATTGGTGTCAACCAGTGTGTTTCGCCGTCTTCGT
A2M|NM_000014|1601	207	2	A2M	NM_000014	1601	TAGAAGACGCACCGGAGGCGTCCCTATACTAAATAAGTTAATATTCATAGCTTATTTGGTATAGGGACGCCTTTTTTTGGCAAGCAAAAGACGGCATACGAGATGTGTGTCAACCAGTGTCATTCGCCGTCTTCGT
A2M|NM_000014|1602	208	2	A2M	NM_000014	1602	TAGAAGACGCACCGGGAAGAGGAAGGGGTATGAGATGTTAATATTCATAGCATTTCATACTCCTTCCTCTTCTTTTTTGGCAAGCAAAAGACGGCATACGAGATACGTGTCAACCAGTGTACTTCGCCGTCTTCGT
A2M|NM_000014|1603	209	2	A2M	NM_000014	1603	TAGAAGACGCACCGGGGGATTTGGTGGTGGTGAATTGTTAATATTCATAGCAGTTTACCACCACCAAATCCCTTTTTTGGCAAGCAAAAGACGGCATACGAGATCAGTGTCAACCAGTGTTGTTCGCCGTCTTCGT
APOBEC3F|NM_001006666|1604	210	200316	APOBEC3F	NM_001006666	1604	TAGAAGACGCACCGGGTGGAGATTATGGGCTATAAAGTTAATATTCATAGCTTTGTAGCCCATGATCTCCACTTTTTTGGCAAGCAAAAGACGGCATACGAGATGTGTGTCAACCAGTCAGTTTCGCCGTCTTCGT
APOBEC3F|NM_001006666|1605	211	200316	APOBEC3F	NM_001006666	1605	TAGAAGACGCACCGGAGGCAATGTATCCACATATATGTTAATATTCATAGCATATGTGTGGATACATTGCCTTTTTTTGGCAAGCAAAAGACGGCATACGAGATCAGTGTCAACCAGTCACATTCGCCGTCTTCGT
APOBEC3F|NM_001006666|1606	212	200316	APOBEC3F	NM_001006666	1606	TAGAAGACGCACCGGGCTTCACTATGGAAGTTGTAAGTTAATATTCATAGCTTACAACTTCCATGGTGAAGCTTTTTTGGCAAGCAAAAGACGGCATACGAGATTGGTGTCAACCAGTCAACTTCGCCGTCTTCGT
APOBEC3F|NM_001006666|1607	213	200316	APOBEC3F	NM_001006666	1607	TAGAAGACGCACCGGCCATTCTTTCTCGTTGGAATAGTTAATATTCATAGCTATTCCGACGAGAAAGGATGGTTTTTTGGCAAGCAAAAGACGGCATACGAGATACGTGTCAACCAGTCATGTTCGCCGTCTTCGT
APOBEC3F|NM_001006666|1608	214	200316	APOBEC3F	NM_001006666	1608	TAGAAGACGCACCGGGAGATCATGGGCTATAAAGATGTTAATATTCATAGCATCTTTGTAGCCCATGATCTCTTTTTTGGCAAGCAAAAGACGGCATACGAGATCAGTGTCAACCAGTACGTTTCGCCGTCTTCGT
APOBEC3F|NM_001006666|1609	215	200316	APOBEC3F	NM_001006666	1609	TAGAAGACGCACCGGGAGCTATTCAAGCTTTGGAAAGTTAATATTCATAGCTTTCCAAGGCTTGAATGGCTCTTTTTTGGCAAGCAAAAGACGGCATACGAGATACGTGTCAACCAGTACCATTCGCCGTCTTCGT
APOBEC3F|NM_001006666|1610	216	200316	APOBEC3F	NM_001006666	1610	TAGAAGACGCACCGGTACTACTTCTGGGATATAGATGTTAATATTCATAGCATCTGTATCCCAGAAGTAGTATTTTTTGGCAAGCAAAAGACGGCATACGAGATGTGTGTCAACCAGTACACTTCGCCGTCTTCGT
APOBEC3F|NM_001006666|1611	217	200316	APOBEC3F	NM_001006666	1611	TAGAAGACGCACCGGTTCACTATGGAAGTTGTAAAGGTTAATATTCATAGCCTTTACAACTTCCATGGTGAATTTTTTGGCAAGCAAAAGACGGCATACGAGATTGGTGTCAACCAGTACTGTTCGCCGTCTTCGT
ELK4|NM_001973|1612	218	2005	ELK4	NM_001973	1612	TAGAAGACGCACCGGCCAGACATCGATACAGATATTGTTAATATTCATAGCAATGTCTGTGTCGATGTCTGGTTTTTTGGCAAGCAAAAGACGGCATACGAGATACGTGTCAACCAGTTGGTTTCGCCGTCTTCGT
ELK4|NM_001973|1613	219	2005	ELK4	NM_001973	1613	TAGAAGACGCACCGGGCTTCTCTTACACCAGTATTTGTTAATATTCATAGCAAATGCTGGTGTAAGAGAAGCTTTTTTGGCAAGCAAAAGACGGCATACGAGATTGGTGTCAACCAGTTGCATTCGCCGTCTTCGT
ELK4|NM_001973|1614	220	2005	ELK4	NM_001973	1614	TAGAAGACGCACCGGGAAGCCTCAGAATAAGCATATGTTAATATTCATAGCATGTGCTTGTTCTGAGGCTTCTTTTTTGGCAAGCAAAAGACGGCATACGAGATCAGTGTCAACCAGTTGACTTCGCCGTCTTCGT
ELK4|NM_001973|1615	221	2005	ELK4	NM_001973	1615	TAGAAGACGCACCGGGGTGACTGTGAAAGTTTAAATGTTAATATTCATAGCGTTTAAACTTTCACAGTCACCTTTTTTGGCAAGCAAAAGACGGCATACGAGATGTGTGTCAACCAGTTGTGTTCGCCGTCTTCGT
ELK4|NM_001973|1616	222	2005	ELK4	NM_001973	1616	TAGAAGACGCACCGGCGAGCCCTCAGATATTATTATGTTAATATTCATAGCATAATAGTATCTGAGGGCTCGTTTTTTGGCAAGCAAAAGACGGCATACGAGATACGTGTCAACCACAGTGTTTCGCCGTCTTCGT
ELK4|NM_001973|1617	223	2005	ELK4	NM_001973	1617	TAGAAGACGCACCGGAACTCTTTGAACTCCTTCAATGTTAATATTCATAGCATTGGAGGAGTTCAAAGAGTTTTTTTTGGCAAGCAAAAGACGGCATACGAGATTGGTGTCAACCACAGTCATTCGCCGTCTTCGT
ELK4|NM_001973|1618	224	2005	ELK4	NM_001973	1618	TAGAAGACGCACCGGTGAGAATCCAGCTGAGAAATTGTTAATATTCATAGCAGTTTCTCGGCTGGATTCTCATTTTTTGGCAAGCAAAAGACGGCATACGAGATCAGTGTCAACCACAGTACTTCGCCGTCTTCGT
ELK4|NM_001973|1619	225	2005	ELK4	NM_001973	1619	TAGAAGACGCACCGGGAACATGGATCCAATGATAGTGTTAATATTCATAGCACTGTCATTGGATCCATGTTCTTTTTTGGCAAGCAAAAGACGGCATACGAGATGTGTGTCAACCACAGTTGTTCGCCGTCTTCGT
ENDOG|NM_004435|1620	226	2021	ENDOG	NM_004435	1620	TAGAAGACGCACCGGGCTGTTCTTTGTGCCAAATATGTTAATATTCATAGCATGTTTGGCACAAAGAGCAGCTTTTTTGGCAAGCAAAAGACGGCATACGAGATTGGTGTCAACCACACAGTTTCGCCGTCTTCGT
ENDOG|NM_004435|1621	227	2021	ENDOG	NM_004435	1621	TAGAAGACGCACCGGGATGGGAAATCCTATGTAAAGGTTAATATTCATAGCCTTTACGTAGGATTTCCCATCTTTTTTGGCAAGCAAAAGACGGCATACGAGATGTGTGTCAACCACACACATTCGCCGTCTTCGT
ENDOG|NM_004435|1622	228	2021	ENDOG	NM_004435	1622	TAGAAGACGCACCGGTGGAACAACTTGGAGAAATATGTTAATATTCATAGCATATTTCTCCAGGTTGTTCCATTTTTTGGCAAGCAAAAGACGGCATACGAGATACGTGTCAACCACACAACTTCGCCGTCTTCGT
ENDOG|NM_004435|1623	229	2021	ENDOG	NM_004435	1623	TAGAAGACGCACCGGATGGGAAATCCTATGTAAAGTGTTAATATTCATAGCACTTTACGTAGGATTTCCCATTTTTTTGGCAAGCAAAAGACGGCATACGAGATCAGTGTCAACCACACATGTTCGCCGTCTTCGT
ENDOG|NM_004435|1624	230	2021	ENDOG	NM_004435	1624	TAGAAGACGCACCGGGGAACAACTTGGAGAAATATAGTTAATATTCATAGCTATATTTCTCCAGGTTGTTCCTTTTTTGGCAAGCAAAAGACGGCATACGAGATGTGTGTCAACCACAACGTTTCGCCGTCTTCGT
ENDOG|NM_004435|1625	231	2021	ENDOG	NM_004435	1625	TAGAAGACGCACCGGGAACAACTTGGAGAAATATAGGTTAATATTCATAGCCTATATTTCTCCAGGTTGTTCTTTTTTGGCAAGCAAAAGACGGCATACGAGATCAGTGTCAACCACAACCATTCGCCGTCTTCGT
ENDOG|NM_004435|1626	232	2021	ENDOG	NM_004435	1626	TAGAAGACGCACCGGGAAATATAGCCGTAGCTTGATGTTAATATTCATAGCGTCAAGCTGCGGCTATATTTCTTTTTTGGCAAGCAAAAGACGGCATACGAGATTGGTGTCAACCACAACACTTCGCCGTCTTCGT
ENDOG|NM_004435|1627	233	2021	ENDOG	NM_004435	1627	TAGAAGACGCACCGGCTGCTCTTTGTGTCAAATATCGTTAATATTCATAGCGATGTTTGGCACAAAGAGCAGTTTTTTGGCAAGCAAAAGACGGCATACGAGATACGTGTCAACCACAACTGTTCGCCGTCTTCGT
ENG|NM_000118|1628	234	2022	ENG	NM_000118	1628	TAGAAGACGCACCGGGCGAGGTGATATATACCATTAGTTAATATTCATAGCTAGTGGTATATGTCACCTCGCTTTTTTGGCAAGCAAAAGACGGCATACGAGATCAGTGTCAACCACATGGTTTCGCCGTCTTCGT
ENG|NM_000118|1629	235	2022	ENG	NM_000118	1629	TAGAAGACGCACCGGCCACTTCTACATAGTACCTATGTTAATATTCATAGCATGGGTACTGTGTAGAAGTGGTTTTTTGGCAAGCAAAAGACGGCATACGAGATACGTGTCAACCACATGCATTCGCCGTCTTCGT
ENG|NM_000118|1630	236	2022	ENG	NM_000118	1630	TAGAAGACGCACCGGGCAGGTGTTAGTAAGTATGATGTTAATATTCATAGCATCATACTTGCTGACACCTGCTTTTTTGGCAAGCAAAAGACGGCATACGAGATGTGTGTCAACCACATGACTTCGCCGTCTTCGT
ENG|NM_000118|1631	237	2022	ENG	NM_000118	1631	TAGAAGACGCACCGGGTCTTGCAGAAACAGTTCATTGTTAATATTCATAGCAATGGACTGTTTCTGCAAGACTTTTTTGGCAAGCAAAAGACGGCATACGAGATTGGTGTCAACCACATGTGTTCGCCGTCTTCGT
ENG|NM_000118|1632	238	2022	ENG	NM_000118	1632	TAGAAGACGCACCGGTGTCCTTGATCCAGATAAAGTGTTAATATTCATAGCACTTTGTCTGGATCAAGGACATTTTTTGGCAAGCAAAAGACGGCATACGAGATCAGTGTCAACCAACGTGTTTCGCCGTCTTCGT
ENG|NM_000118|1633	239	2022	ENG	NM_000118	1633	TAGAAGACGCACCGGGCTTCTGGTTCTTAGTGTAAAGTTAATATTCATAGCTTTACACTGAGGACCAGAAGCTTTTTTGGCAAGCAAAAGACGGCATACGAGATACGTGTCAACCAACGTCATTCGCCGTCTTCGT
ENG|NM_000118|1634	240	2022	ENG	NM_000118	1634	TAGAAGACGCACCGGGATGCTTAATGCCAGTATTGTGTTAATATTCATAGCACAATGCTGGCATTGAGCATCTTTTTTGGCAAGCAAAAGACGGCATACGAGATGTGTGTCAACCAACGTACTTCGCCGTCTTCGT
ENO1|NM_001201483|1635	241	2023	ENO1	NM_001201483	1635	TAGAAGACGCACCGGGAATGTCATCAAGGAGAAATAGTTAATATTCATAGCTATTTCTCCTTGATGACATTCTTTTTTGGCAAGCAAAAGACGGCATACGAGATTGGTGTCAACCAACGTTGTTCGCCGTCTTCGT
ENO1|NM_001201483|1636	242	2023	ENO1	NM_001201483	1636	TAGAAGACGCACCGGCGTGAATGAGAAGTCCTGTAAGTTAATATTCATAGCTTGCAGGACTTCTCGTTCACGTTTTTTGGCAAGCAAAAGACGGCATACGAGATACGTGTCAACCAACCAGTTTCGCCGTCTTCGT
ENO1|NM_001201483|1637	243	2023	ENO1	NM_001201483	1637	TAGAAGACGCACCGGCCACTGTTGGGGTTGATCTTTGTTAATATTCATAGCAGAGATCAACCTCAACAGTGGTTTTTTGGCAAGCAAAAGACGGCATACGAGATTGGTGTCAACCAACCACATTCGCCGTCTTCGT
ENO1|NM_001201483|1638	244	2023	ENO1	NM_001201483	1638	TAGAAGACGCACCGGTGCCCTGGTTAGTAAGAAATTGTTAATATTCATAGCAGTTTCTTGCTAACCAGGGCATTTTTTGGCAAGCAAAAGACGGCATACGAGATCAGTGTCAACCAACCAACTTCGCCGTCTTCGT
ENO1|NM_001201483|1639	245	2023	ENO1	NM_001201483	1639	TAGAAGACGCACCGGTATGGGAAAGATGCCATCAATGTTAATATTCATAGCATTGGTGGCATCTTTCCCATATTTTTTGGCAAGCAAAAGACGGCATACGAGATGTGTGTCAACCAACCATGTTCGCCGTCTTCGT
ENO1|NM_001201483|1640	246	2023	ENO1	NM_001201483	1640	TAGAAGACGCACCGGCCAACATCTTGGAGAATAAAGGTTAATATTCATAGCCTTTATTCTCCAGGATGTTGGTTTTTTGGCAAGCAAAAGACGGCATACGAGATTGGTGTCAACCAACACGTTTCGCCGTCTTCGT
ENO1|NM_001201483|1641	247	2023	ENO1	NM_001201483	1641	TAGAAGACGCACCGGAAAGCTGGCTACATTGATAAGGTTAATATTCATAGCCTTATCAGTGTAGCCAGCTTTTTTTTTGGCAAGCAAAAGACGGCATACGAGATGTGTGTCAACCAACACCATTCGCCGTCTTCGT
ENO1|NM_001201483|1642	248	2023	ENO1	NM_001201483	1642	TAGAAGACGCACCGGAGTTCTTTAGGTTTGGGAAGTGTTAATATTCATAGCACTTCCCAGACCTGAAGAACTTTTTTTGGCAAGCAAAAGACGGCATACGAGATACGTGTCAACCAACACACTTCGCCGTCTTCGT
CMYA5|NM_153610|1643	249	202333	CMYA5	NM_153610	1643	TAGAAGACGCACCGGCCAGTGAAAGGGCTATCTTTGGTTAATATTCATAGCTAAAGATGGCCCTTTCACTGGTTTTTTGGCAAGCAAAAGACGGCATACGAGATCAGTGTCAACCAACACTGTTCGCCGTCTTCGT
CMYA5|NM_153610|1644	250	202333	CMYA5	NM_153610	1644	TAGAAGACGCACCGGTAACCTCCAACCTAATGATAAGTTAATATTCATAGCTTATCATTGGGTTGGAGGTTATTTTTTGGCAAGCAAAAGACGGCATACGAGATGTGTGTCAACCAACTGGTTTCGCCGTCTTCGT
CMYA5|NM_153610|1645	251	202333	CMYA5	NM_153610	1645	TAGAAGACGCACCGGGAAGAAATAGGCCACCTAAATGTTAATATTCATAGCATTTGGGTGGCCTGTTTCTTCTTTTTTGGCAAGCAAAAGACGGCATACGAGATCAGTGTCAACCAACTGCATTCGCCGTCTTCGT
CMYA5|NM_153610|1646	252	202333	CMYA5	NM_153610	1646	TAGAAGACGCACCGGGCATCATTTCCCAGTAGAAATGTTAATATTCATAGCATTTCTGCTGGGAAATGATGCTTTTTTGGCAAGCAAAAGACGGCATACGAGATTGGTGTCAACCAACTGACTTCGCCGTCTTCGT
CMYA5|NM_153610|1647	253	202333	CMYA5	NM_153610	1647	TAGAAGACGCACCGGGGAACTGTAGCTTTAGAGAATGTTAATATTCATAGCATTCTCTGAAGCTGCAGTTCCTTTTTTGGCAAGCAAAAGACGGCATACGAGATACGTGTCAACCAACTGTGTTCGCCGTCTTCGT
CMYA5|NM_153610|1648	254	202333	CMYA5	NM_153610	1648	TAGAAGACGCACCGGGAAGGTTGTGAGATATTGAATGTTAATATTCATAGCATTCAATATCTCACAGCCTTCTTTTTTGGCAAGCAAAAGACGGCATACGAGATGTGTGTCAACCATGGTGTTTCGCCGTCTTCGT
CMYA5|NM_153610|1649	255	202333	CMYA5	NM_153610	1649	TAGAAGACGCACCGGGAGGTGTTTAGGGAAGATTATGTTAATATTCATAGCATAATCTTCCCTAGACACCTCTTTTTTGGCAAGCAAAAGACGGCATACGAGATCAGTGTCAACCATGGTCATTCGCCGTCTTCGT
CMYA5|NM_153610|1650	256	202333	CMYA5	NM_153610	1650	TAGAAGACGCACCGGGAGGCATAGGAGGAAGAAGTTGTTAATATTCATAGCAATTTCTTCCTCCTGTGCCTCTTTTTTGGCAAGCAAAAGACGGCATACGAGATTGGTGTCAACCATGGTACTTCGCCGTCTTCGT
ENO3|NM_001193503|1651	257	2027	ENO3	NM_001193503	1651	TAGAAGACGCACCGGGCATCTGAGTTCTATCGTAATGTTAATATTCATAGCATTGCGATAGAACTCAGATGCTTTTTTGGCAAGCAAAAGACGGCATACGAGATACGTGTCAACCATGGTTGTTCGCCGTCTTCGT
ENO3|NM_001193503|1652	258	2027	ENO3	NM_001193503	1652	TAGAAGACGCACCGGGCTGTATAAGAGCTTTATCAAGTTAATATTCATAGCTTGATAAAGCTCTTATACAGCTTTTTTGGCAAGCAAAAGACGGCATACGAGATCAGTGTCAACCATGCAGTTTCGCCGTCTTCGT
ENO3|NM_001193503|1653	259	2027	ENO3	NM_001193503	1653	TAGAAGACGCACCGGAGAGCTGTATAAGAGCTTTATGTTAATATTCATAGCATAAAGCTCTTATACAGCTCTTTTTTTGGCAAGCAAAAGACGGCATACGAGATACGTGTCAACCATGCACATTCGCCGTCTTCGT
ENO3|NM_001193503|1654	260	2027	ENO3	NM_001193503	1654	TAGAAGACGCACCGGCCCAACATCTTGGAGAATAATGTTAATATTCATAGCATTGTTCTCCAGGATGTTGGGTTTTTTGGCAAGCAAAAGACGGCATACGAGATGTGTGTCAACCATGCAACTTCGCCGTCTTCGT
ENO3|NM_001193503|1655	261	2027	ENO3	NM_001193503	1655	TAGAAGACGCACCGGGACTTTAAGTCGCTTGATGATGTTAATATTCATAGCATCATCAGGCGACTTGAAGTCTTTTTTGGCAAGCAAAAGACGGCATACGAGATTGGTGTCAACCATGCATGTTCGCCGTCTTCGT
ENO3|NM_001193503|1656	262	2027	ENO3	NM_001193503	1656	TAGAAGACGCACCGGGTATCTATGAGGCTTTGGAATGTTAATATTCATAGCGTTCCAGAGCCTCATAGATACTTTTTTGGCAAGCAAAAGACGGCATACGAGATACGTGTCAACCATGACGTTTCGCCGTCTTCGT
ENO3|NM_001193503|1657	263	2027	ENO3	NM_001193503	1657	TAGAAGACGCACCGGTATGGGAAGGATGTCACTAATGTTAATATTCATAGCATTGGTGGCATCCTTCCCATATTTTTTGGCAAGCAAAAGACGGCATACGAGATTGGTGTCAACCATGACCATTCGCCGTCTTCGT
ENO3|NM_001193503|1658	264	2027	ENO3	NM_001193503	1658	TAGAAGACGCACCGGTAAGCGTTGTGGATTAAGAAAGTTAATATTCATAGCTTTCTTGATCCACAACGCTTATTTTTTGGCAAGCAAAAGACGGCATACGAGATCAGTGTCAACCATGACACTTCGCCGTCTTCGT
EP300|NM_001429|1659	265	2033	EP300	NM_001429	1659	TAGAAGACGCACCGGCAATTCCGAGATATCTTGAGAGTTAATATTCATAGCTCTCAAGATGTCTCGGAATTGTTTTTTGGCAAGCAAAAGACGGCATACGAGATGTGTGTCAACCATGACTGTTCGCCGTCTTCGT
EP300|NM_001429|1660	266	2033	EP300	NM_001429	1660	TAGAAGACGCACCGGTACACTAGAGACACTTTGTATGTTAATATTCATAGCATACAAGGTGTCTCTAGTGTATTTTTTGGCAAGCAAAAGACGGCATACGAGATTGGTGTCAACCATGTGGTTTCGCCGTCTTCGT
EP300|NM_001429|1661	267	2033	EP300	NM_001429	1661	TAGAAGACGCACCGGCCAGCCTCAAACTATAATAAAGTTAATATTCATAGCTTTATTGTAGTTTGAGGCTGGTTTTTTGGCAAGCAAAAGACGGCATACGAGATGTGTGTCAACCATGTGCATTCGCCGTCTTCGT
EP300|NM_001429|1662	268	2033	EP300	NM_001429	1662	TAGAAGACGCACCGGGCCTTCACAATTTCGAGATATGTTAATATTCATAGCATGTCTCGGAATTGTGAAGGCTTTTTTGGCAAGCAAAAGACGGCATACGAGATACGTGTCAACCATGTGACTTCGCCGTCTTCGT
EP300|NM_001429|1663	269	2033	EP300	NM_001429	1663	TAGAAGACGCACCGGCCCGGTGAATTCTCTTATAATGTTAATATTCATAGCATTATAGGAGAGTTCACCGGGTTTTTTGGCAAGCAAAAGACGGCATACGAGATCAGTGTCAACCATGTGTGTTCGCCGTCTTCGT
EP300|NM_001429|1664	270	2033	EP300	NM_001429	1664	TAGAAGACGCACCGGTAACCAATGGTGGTGATATTAGTTAATATTCATAGCTAATATCACCACCATTGGTTATTTTTTGGCAAGCAAAAGACGGCATACGAGATCAGTGTCAACACGTGTGTTTCGCCGTCTTCGT
EP300|NM_001429|1665	271	2033	EP300	NM_001429	1665	TAGAAGACGCACCGGATACTCAGCTGGAGGATATTTGTTAATATTCATAGCAAATATCCTCCGGCTGAGTATTTTTTTGGCAAGCAAAAGACGGCATACGAGATACGTGTCAACACGTGTCATTCGCCGTCTTCGT
EP300|NM_001429|1666	272	2033	EP300	NM_001429	1666	TAGAAGACGCACCGGTCAATAATGCCTGGTTATATAGTTAATATTCATAGCTATATAACCAGGCATTATTGATTTTTTGGCAAGCAAAAGACGGCATACGAGATGTGTGTCAACACGTGTACTTCGCCGTCTTCGT
EPB41|NM_001166005|1667	273	2035	EPB41	NM_001166005	1667	TAGAAGACGCACCGGGCAGCTAAGAAATTATGGAAAGTTAATATTCATAGCTTTCCATAATTTCTTAGCTGCTTTTTTGGCAAGCAAAAGACGGCATACGAGATTGGTGTCAACACGTGTTGTTCGCCGTCTTCGT
EPB41|NM_001166005|1668	274	2035	EPB41	NM_001166005	1668	TAGAAGACGCACCGGCGGCTTAGTGAATGGGATAAGGTTAATATTCATAGCTTTATCCCATTCACTAGGCCGTTTTTTGGCAAGCAAAAGACGGCATACGAGATACGTGTCAACACGTCAGTTTCGCCGTCTTCGT
EPB41|NM_001166005|1669	275	2035	EPB41	NM_001166005	1669	TAGAAGACGCACCGGGTTACCGAGCAGTTAAGAAATGTTAATATTCATAGCATTTCTTAGCTGCTCGGTAACTTTTTTGGCAAGCAAAAGACGGCATACGAGATTGGTGTCAACACGTCACATTCGCCGTCTTCGT
EPB41|NM_001166005|1670	276	2035	EPB41	NM_001166005	1670	TAGAAGACGCACCGGGAGGTTAGAAAGAGATAGAATGTTAATATTCATAGCATTCTATCTCTTTCTGACCTCTTTTTTGGCAAGCAAAAGACGGCATACGAGATCAGTGTCAACACGTCAACTTCGCCGTCTTCGT
EPB41|NM_001166005|1671	277	2035	EPB41	NM_001166005	1671	TAGAAGACGCACCGGGTGACAGTACTCACCTTAAATGTTAATATTCATAGCATTTGAGGTGGGTACTGTCACTTTTTTGGCAAGCAAAAGACGGCATACGAGATGTGTGTCAACACGTCATGTTCGCCGTCTTCGT
EPB41|NM_001166005|1672	278	2035	EPB41	NM_001166005	1672	TAGAAGACGCACCGGGAGCAAGAGTAGTATGAAAGTGTTAATATTCATAGCACTTTCATACTGCTCTTGCTCTTTTTTGGCAAGCAAAAGACGGCATACGAGATTGGTGTCAACACGTACGTTTCGCCGTCTTCGT
EPB41|NM_001166005|1673	279	2035	EPB41	NM_001166005	1673	TAGAAGACGCACCGGGAACTCAGAGAAGATCTAGATGTTAATATTCATAGCATCTGGATCTTCTCTGAGTTCTTTTTTGGCAAGCAAAAGACGGCATACGAGATGTGTGTCAACACGTACCATTCGCCGTCTTCGT
EPB41|NM_001166005|1674	280	2035	EPB41	NM_001166005	1674	TAGAAGACGCACCGGGCTGGATTTCGCTAAAGAAATGTTAATATTCATAGCATTTCTTTGGCGGAATCCAGCTTTTTTGGCAAGCAAAAGACGGCATACGAGATACGTGTCAACACGTACACTTCGCCGTCTTCGT
EPHA7|NM_004440|1675	281	2045	EPHA7	NM_004440	1675	TAGAAGACGCACCGGTGGTCCATTATTGAGAACTTAGTTAATATTCATAGCTAAGTTCTCAATAATGGACCATTTTTTGGCAAGCAAAAGACGGCATACGAGATCAGTGTCAACACGTACTGTTCGCCGTCTTCGT
EPHA7|NM_004440|1676	282	2045	EPHA7	NM_004440	1676	TAGAAGACGCACCGGCCACCCAAATGTTGTCTATTTGTTAATATTCATAGCAAATGGACAACATTTGGGTGGTTTTTTGGCAAGCAAAAGACGGCATACGAGATGTGTGTCAACACGTTGGTTTCGCCGTCTTCGT
EPHA7|NM_004440|1677	283	2045	EPHA7	NM_004440	1677	TAGAAGACGCACCGGCGATGTGACCTATAGAATATTGTTAATATTCATAGCAATATTCTGTAGGTCACATCGTTTTTTGGCAAGCAAAAGACGGCATACGAGATCAGTGTCAACACGTTGCATTCGCCGTCTTCGT
EPHA7|NM_004440|1678	284	2045	EPHA7	NM_004440	1678	TAGAAGACGCACCGGGAAACCAGTCATGATAGTAATGTTAATATTCATAGCATTACTATCATGACTGGTTTCTTTTTTGGCAAGCAAAAGACGGCATACGAGATTGGTGTCAACACGTTGACTTCGCCGTCTTCGT
EPHA7|NM_004440|1679	285	2045	EPHA7	NM_004440	1679	TAGAAGACGCACCGGGAACTTGTAGTAGGCTAATAAGTTAATATTCATAGCTTATTGGCCTACTACAAGTTCTTTTTTGGCAAGCAAAAGACGGCATACGAGATACGTGTCAACACGTTGTGTTCGCCGTCTTCGT
EPHA7|NM_004440|1680	286	2045	EPHA7	NM_004440	1680	TAGAAGACGCACCGGGTCTACTTCAGCCTCTATTAAGTTAATATTCATAGCTTAATGGAGGCTGAAGTAGACTTTTTTGGCAAGCAAAAGACGGCATACGAGATGTGTGTCAACACCAGTGTTTCGCCGTCTTCGT
EPHA7|NM_004440|1681	287	2045	EPHA7	NM_004440	1681	TAGAAGACGCACCGGGAAACCTATGAGGACCTAAATGTTAATATTCATAGCATTTGGGTCCTCATAGGTTTCTTTTTTGGCAAGCAAAAGACGGCATACGAGATCAGTGTCAACACCAGTCATTCGCCGTCTTCGT
EPHA7|NM_004440|1682	288	2045	EPHA7	NM_004440	1682	TAGAAGACGCACCGGTGTTCCTTGTGGGAGTAATATGTTAATATTCATAGCATGTTACTCCCACAGGGAACATTTTTTGGCAAGCAAAAGACGGCATACGAGATTGGTGTCAACACCAGTACTTCGCCGTCTTCGT
HIPK1|NM_152696|1683	289	204851	HIPK1	NM_152696	1683	TAGAAGACGCACCGGCCAAGGAAATTGTGGTTATTAGTTAATATTCATAGCTAATAGCCACAATTTCCTTGGTTTTTTGGCAAGCAAAAGACGGCATACGAGATACGTGTCAACACCAGTTGTTCGCCGTCTTCGT
HIPK1|NM_152696|1684	290	204851	HIPK1	NM_152696	1684	TAGAAGACGCACCGGCCAGTGTTCTAGTTTCTAGTTGTTAATATTCATAGCAACTGGAAGCTAGAACACTGGTTTTTTGGCAAGCAAAAGACGGCATACGAGATCAGTGTCAACACCACAGTTTCGCCGTCTTCGT
HIPK1|NM_152696|1685	291	204851	HIPK1	NM_152696	1685	TAGAAGACGCACCGGGCCCATGTTGTTAGACAATAAGTTAATATTCATAGCTTGTTGTCTGACAACATGGGCTTTTTTGGCAAGCAAAAGACGGCATACGAGATACGTGTCAACACCACACATTCGCCGTCTTCGT
HIPK1|NM_152696|1686	292	204851	HIPK1	NM_152696	1686	TAGAAGACGCACCGGGCAATCATGTTAAGTCTTGTTGTTAATATTCATAGCAACAAGACTTAACATGATTGCTTTTTTGGCAAGCAAAAGACGGCATACGAGATGTGTGTCAACACCACAACTTCGCCGTCTTCGT
HIPK1|NM_152696|1687	293	204851	HIPK1	NM_152696	1687	TAGAAGACGCACCGGCAGCCCTTATTCCATTGATATGTTAATATTCATAGCGTATCAGTGGAATAAGGGCTGTTTTTTGGCAAGCAAAAGACGGCATACGAGATTGGTGTCAACACCACATGTTCGCCGTCTTCGT
HIPK1|NM_152696|1688	294	204851	HIPK1	NM_152696	1688	TAGAAGACGCACCGGCCTTCTGCAGTGTGAAGAAATGTTAATATTCATAGCGTTTCTTCGCACTGCAGAAGGTTTTTTGGCAAGCAAAAGACGGCATACGAGATACGTGTCAACACCAACGTTTCGCCGTCTTCGT
HIPK1|NM_152696|1689	295	204851	HIPK1	NM_152696	1689	TAGAAGACGCACCGGGAAGAGGAGTACTAAGGAAATGTTAATATTCATAGCATTTCCTTGGTGCTCCTCTTCTTTTTTGGCAAGCAAAAGACGGCATACGAGATTGGTGTCAACACCAACCATTCGCCGTCTTCGT
HIPK1|NM_152696|1690	296	204851	HIPK1	NM_152696	1690	TAGAAGACGCACCGGAACACTAGTTTGCCACCTAATGTTAATATTCATAGCATTGGGTGGCAAACTGGTGTTTTTTTTGGCAAGCAAAAGACGGCATACGAGATCAGTGTCAACACCAACACTTCGCCGTCTTCGT
EPO|NM_000799|1691	297	2056	EPO	NM_000799	1691	TAGAAGACGCACCGGGAACAATCACTGCTGATACTTGTTAATATTCATAGCAAGTGTCAGCAGTGATTGTTCTTTTTTGGCAAGCAAAAGACGGCATACGAGATGTGTGTCAACACCAACTGTTCGCCGTCTTCGT
EPO|NM_000799|1692	298	2056	EPO	NM_000799	1692	TAGAAGACGCACCGGGCTGAACATTGCAGTTTGAATGTTAATATTCATAGCATTCAAGCTGCAGTGTTCAGCTTTTTTGGCAAGCAAAAGACGGCATACGAGATTGGTGTCAACACCATGGTTTCGCCGTCTTCGT
EPO|NM_000799|1693	299	2056	EPO	NM_000799	1693	TAGAAGACGCACCGGCACTGCAGTTTGAATGAGAATGTTAATATTCATAGCATTCTCATTCAAGCTGCAGTGTTTTTTGGCAAGCAAAAGACGGCATACGAGATGTGTGTCAACACCATGCATTCGCCGTCTTCGT
EPO|NM_000799|1694	300	2056	EPO	NM_000799	1694	TAGAAGACGCACCGGTGTTCCGAGTCTACTCTAATTGTTAATATTCATAGCAATTGGAGTAGACTCGGAAGATTTTTTGGCAAGCAAAAGACGGCATACGAGATACGTGTCAACACCATGACTTCGCCGTCTTCGT
EPO|NM_000799|1695	301	2056	EPO	NM_000799	1695	TAGAAGACGCACCGGCTGCAGTTGTATGTGGATAAAGTTAATATTCATAGCTTTATCCACATGCAGCTGCAGTTTTTTGGCAAGCAAAAGACGGCATACGAGATCAGTGTCAACACCATGTGTTCGCCGTCTTCGT
EPO|NM_000799|1696	302	2056	EPO	NM_000799	1696	TAGAAGACGCACCGGTAATTTCTATGCTTGGAAGAGGTTAATATTCATAGCCTCTTCCAGGCATAGAAATTATTTTTTGGCAAGCAAAAGACGGCATACGAGATTGGTGTCAACACACGTGTTTCGCCGTCTTCGT
EPO|NM_000799|1697	303	2056	EPO	NM_000799	1697	TAGAAGACGCACCGGAAAGCTGAAGTTGTACATAGGGTTAATATTCATAGCCCTGTGTACAGCTTCAGCTTTTTTTTTGGCAAGCAAAAGACGGCATACGAGATGTGTGTCAACACACGTCATTCGCCGTCTTCGT
EPO|NM_000799|1698	304	2056	EPO	NM_000799	1698	TAGAAGACGCACCGGACTGCAGTTTGAATGAGAATAGTTAATATTCATAGCTATTCTCATTCAAGCTGCAGTTTTTTTGGCAAGCAAAAGACGGCATACGAGATACGTGTCAACACACGTACTTCGCCGTCTTCGT
ERBB2|NM_001005862|1699	305	2064	ERBB2	NM_001005862	1699	TAGAAGACGCACCGGCAGTTACCAGTGCTAATATTCGTTAATATTCATAGCGGATATTGGCACTGGTAACTGTTTTTTGGCAAGCAAAAGACGGCATACGAGATCAGTGTCAACACACGTTGTTCGCCGTCTTCGT
ERBB2|NM_001005862|1700	306	2064	ERBB2	NM_001005862	1700	TAGAAGACGCACCGGGATCACAGGTTACCTATATATGTTAATATTCATAGCATGTATAGGTAACCTGTGATCTTTTTTGGCAAGCAAAAGACGGCATACGAGATGTGTGTCAACACACCAGTTTCGCCGTCTTCGT
ERBB2|NM_001005862|1701	307	2064	ERBB2	NM_001005862	1701	TAGAAGACGCACCGGGAAGTACACGATGTGGAGATTGTTAATATTCATAGCAGTCTCCGCATCGTGTACTTCTTTTTTGGCAAGCAAAAGACGGCATACGAGATCAGTGTCAACACACCACATTCGCCGTCTTCGT
ERBB2|NM_001005862|1702	308	2064	ERBB2	NM_001005862	1702	TAGAAGACGCACCGGCAGCTCTTTGAGGACAATTATGTTAATATTCATAGCATAGTTGTCCTCAAAGAGCTGTTTTTTGGCAAGCAAAAGACGGCATACGAGATTGGTGTCAACACACCAACTTCGCCGTCTTCGT
ERBB2|NM_001005862|1703	309	2064	ERBB2	NM_001005862	1703	TAGAAGACGCACCGGCAGTGCTAATATCTAGGAGTTGTTAATATTCATAGCAACTCCTGGATATTGGCACTGTTTTTTGGCAAGCAAAAGACGGCATACGAGATACGTGTCAACACACCATGTTCGCCGTCTTCGT
ERBB2|NM_001005862|1704	310	2064	ERBB2	NM_001005862	1704	TAGAAGACGCACCGGGAATATGTGAACCAGCTAGATGTTAATATTCATAGCATCTGGCTGGTTCACATATTCTTTTTTGGCAAGCAAAAGACGGCATACGAGATCAGTGTCAACACACACGTTTCGCCGTCTTCGT
ERBB2|NM_001005862|1705	311	2064	ERBB2	NM_001005862	1705	TAGAAGACGCACCGGGAGATCACAGGTTACTTATACGTTAATATTCATAGCGTATAGGTAACCTGTGATCTCTTTTTTGGCAAGCAAAAGACGGCATACGAGATACGTGTCAACACACACCATTCGCCGTCTTCGT
ERBB2|NM_001005862|1706	312	2064	ERBB2	NM_001005862	1706	TAGAAGACGCACCGGTGTGGCTTGTGCCCATTATAAGTTAATATTCATAGCTTATAGTGGGCACAGGCCACATTTTTTGGCAAGCAAAAGACGGCATACGAGATGTGTGTCAACACACACACTTCGCCGTCTTCGT
ERBB3|NM_001005915|1707	313	2065	ERBB3	NM_001005915	1707	TAGAAGACGCACCGGCCCAGTGAGAAGGTTAATAAAGTTAATATTCATAGCTTTGTTAGCCTTCTCACTGGGTTTTTTGGCAAGCAAAAGACGGCATACGAGATTGGTGTCAACACACACTGTTCGCCGTCTTCGT
ERBB3|NM_001005915|1708	314	2065	ERBB3	NM_001005915	1708	TAGAAGACGCACCGGCCTGATAAGATGGAAGTAGATGTTAATATTCATAGCATCTACTTCCATCTTGTCAGGTTTTTTGGCAAGCAAAAGACGGCATACGAGATACGTGTCAACACACTGGTTTCGCCGTCTTCGT
ERBB3|NM_001005915|1709	315	2065	ERBB3	NM_001005915	1709	TAGAAGACGCACCGGCGACTAGACATCAAGTATAATGTTAATATTCATAGCATTATGCTTGATGTCTAGTCGTTTTTTGGCAAGCAAAAGACGGCATACGAGATTGGTGTCAACACACTGCATTCGCCGTCTTCGT
ERBB3|NM_001005915|1710	316	2065	ERBB3	NM_001005915	1710	TAGAAGACGCACCGGCTGCCTTTGATAACCTTGATTGTTAATATTCATAGCAATCAGGGTTATCAAAGGCAGTTTTTTGGCAAGCAAAAGACGGCATACGAGATCAGTGTCAACACACTGACTTCGCCGTCTTCGT
ERBB3|NM_001005915|1711	317	2065	ERBB3	NM_001005915	1711	TAGAAGACGCACCGGGAATTCTCTACTCTACTATTGGTTAATATTCATAGCCAATGGTAGAGTAGAGAATTCTTTTTTGGCAAGCAAAAGACGGCATACGAGATGTGTGTCAACACACTGTGTTCGCCGTCTTCGT
ERBB3|NM_001005915|1712	318	2065	ERBB3	NM_001005915	1712	TAGAAGACGCACCGGTATATGAATCGGCAATGAGATGTTAATATTCATAGCATCTCGTTGCCGATTCATATATTTTTTGGCAAGCAAAAGACGGCATACGAGATACGTGTCAACACTGGTGTTTCGCCGTCTTCGT
ERBB3|NM_001005915|1713	319	2065	ERBB3	NM_001005915	1713	TAGAAGACGCACCGGGCTCTGATACTTGTGCTTAATGTTAATATTCATAGCATTGAGCACAAGTATCAGAGCTTTTTTGGCAAGCAAAAGACGGCATACGAGATTGGTGTCAACACTGGTCATTCGCCGTCTTCGT
ERBB3|NM_001005915|1714	320	2065	ERBB3	NM_001005915	1714	TAGAAGACGCACCGGGCCTACTAGTTGGAACATTTAGTTAATATTCATAGCTAAGTGTTCCAACTGGTAGGCTTTTTTGGCAAGCAAAAGACGGCATACGAGATCAGTGTCAACACTGGTACTTCGCCGTCTTCGT
ERBB4|NM_001042599|1715	321	2066	ERBB4	NM_001042599	1715	TAGAAGACGCACCGGGCGCAGGAAACATTTATATTAGTTAATATTCATAGCTAATATAGATGTTTCCTGCGCTTTTTTGGCAAGCAAAAGACGGCATACGAGATGTGTGTCAACACTGGTTGTTCGCCGTCTTCGT
ERBB4|NM_001042599|1716	322	2066	ERBB4	NM_001042599	1716	TAGAAGACGCACCGGGATAACCAGCATTGAGTACAAGTTAATATTCATAGCTTGTGCTCAATGCTGGTTATCTTTTTTGGCAAGCAAAAGACGGCATACGAGATTGGTGTCAACACTGCAGTTTCGCCGTCTTCGT
ERBB4|NM_001042599|1717	323	2066	ERBB4	NM_001042599	1717	TAGAAGACGCACCGGCAGACTACCTGTAGGAGTATAGTTAATATTCATAGCTGTACTCCTGCAGGTAGTCTGTTTTTTGGCAAGCAAAAGACGGCATACGAGATGTGTGTCAACACTGCACATTCGCCGTCTTCGT
ERBB4|NM_001042599|1718	324	2066	ERBB4	NM_001042599	1718	TAGAAGACGCACCGGGCCCGTAGTGTCTTAGTGGAAGTTAATATTCATAGCTTTCACTAAGACATTACGGGCTTTTTTGGCAAGCAAAAGACGGCATACGAGATACGTGTCAACACTGCAACTTCGCCGTCTTCGT
ERBB4|NM_001042599|1719	325	2066	ERBB4	NM_001042599	1719	TAGAAGACGCACCGGCCAGAGAAACTGAATGTCTTTGTTAATATTCATAGCAAAGACGTTCAGTTTCTCTGGTTTTTTGGCAAGCAAAAGACGGCATACGAGATCAGTGTCAACACTGCATGTTCGCCGTCTTCGT
ERBB4|NM_001042599|1720	326	2066	ERBB4	NM_001042599	1720	TAGAAGACGCACCGGGCCGAGGATGGGTATGTGGATGTTAATATTCATAGCATTCACATACTCATCCTCGGCTTTTTTGGCAAGCAAAAGACGGCATACGAGATGTGTGTCAACACTGACGTTTCGCCGTCTTCGT
ERBB4|NM_001042599|1721	327	2066	ERBB4	NM_001042599	1721	TAGAAGACGCACCGGTGATTGCAGTTGGAGTAATTGGTTAATATTCATAGCCAATTACTCCAGCTGCAATCATTTTTTGGCAAGCAAAAGACGGCATACGAGATCAGTGTCAACACTGACCATTCGCCGTCTTCGT
ERBB4|NM_001042599|1722	328	2066	ERBB4	NM_001042599	1722	TAGAAGACGCACCGGGGAGCTATGGAGTTATTATATGTTAATATTCATAGCATATAGTAACTCCATAGCTCCTTTTTTGGCAAGCAAAAGACGGCATACGAGATTGGTGTCAACACTGACACTTCGCCGTCTTCGT
ERCC2|NM_000400|1723	329	2068	ERCC2	NM_000400	1723	TAGAAGACGCACCGGGCGTTTCCAGTTTGTCATTATGTTAATATTCATAGCATGATGACAGACTGGAAACGCTTTTTTGGCAAGCAAAAGACGGCATACGAGATACGTGTCAACACTGACTGTTCGCCGTCTTCGT
ERCC2|NM_000400|1724	330	2068	ERCC2	NM_000400	1724	TAGAAGACGCACCGGGCTTCGAAAGTTGCTTAACTTGTTAATATTCATAGCAAGTTGAGCAACTTTCGAAGCTTTTTTGGCAAGCAAAAGACGGCATACGAGATCAGTGTCAACACTGTGGTTTCGCCGTCTTCGT
ERCC2|NM_000400|1725	331	2068	ERCC2	NM_000400	1725	TAGAAGACGCACCGGCCAGTTCTAGATTTGTGAGAAGTTAATATTCATAGCTTCTCACGAATCTGGAACTGGTTTTTTGGCAAGCAAAAGACGGCATACGAGATACGTGTCAACACTGTGCATTCGCCGTCTTCGT
ERCC2|NM_000400|1726	332	2068	ERCC2	NM_000400	1726	TAGAAGACGCACCGGTGGCCATTAAACCTGTATTTGGTTAATATTCATAGCCAAATACGGGTTTGATGGCCATTTTTTGGCAAGCAAAAGACGGCATACGAGATGTGTGTCAACACTGTGACTTCGCCGTCTTCGT
ERCC2|NM_000400|1727	333	2068	ERCC2	NM_000400	1727	TAGAAGACGCACCGGATGGCATACCAGAGAGTATATGTTAATATTCATAGCATATGCTCTCTGGTATGCCATTTTTTTGGCAAGCAAAAGACGGCATACGAGATTGGTGTCAACACTGTGTGTTCGCCGTCTTCGT
ERCC2|NM_000400|1728	334	2068	ERCC2	NM_000400	1728	TAGAAGACGCACCGGTACTCAATCCTGCATGTCAATGTTAATATTCATAGCATTGGCATGCAGGATTGAGTATTTTTTGGCAAGCAAAAGACGGCATACGAGATACGTGTCAACTGGTGTGTTTCGCCGTCTTCGT
ERCC2|NM_000400|1729	335	2068	ERCC2	NM_000400	1729	TAGAAGACGCACCGGGAATTGACTTTGTGCACCATTGTTAATATTCATAGCAGTGGTGCACAAAGTCGATTCTTTTTTGGCAAGCAAAAGACGGCATACGAGATTGGTGTCAACTGGTGTCATTCGCCGTCTTCGT
ERCC2|NM_000400|1730	336	2068	ERCC2	NM_000400	1730	TAGAAGACGCACCGGGTGATTGAAGAGCTTTGAAAGGTTAATATTCATAGCCTTTCGAAGCTCTTCAATCACTTTTTTGGCAAGCAAAAGACGGCATACGAGATCAGTGTCAACTGGTGTACTTCGCCGTCTTCGT
AKT1|NM_001014431|1731	337	207	AKT1	NM_001014431	1731	TAGAAGACGCACCGGGGACAAGGATGGGCATATTAAGTTAATATTCATAGCTTAATGTGCCCGTCCTTGTCCTTTTTTGGCAAGCAAAAGACGGCATACGAGATGTGTGTCAACTGGTGTTGTTCGCCGTCTTCGT
AKT1|NM_001014431|1732	338	207	AKT1	NM_001014431	1732	TAGAAGACGCACCGGCGAGTTTGAGTACTTGAAGTTGTTAATATTCATAGCAGCTTCAGGTACTCAAACTCGTTTTTTGGCAAGCAAAAGACGGCATACGAGATTGGTGTCAACTGGTCAGTTTCGCCGTCTTCGT
AKT1|NM_001014431|1733	339	207	AKT1	NM_001014431	1733	TAGAAGACGCACCGGCTATGGCGTTGAGATTGTGTTGTTAATATTCATAGCGACACAATCTCAGCGCCATAGTTTTTTGGCAAGCAAAAGACGGCATACGAGATGTGTGTCAACTGGTCACATTCGCCGTCTTCGT
AKT1|NM_001014431|1734	340	207	AKT1	NM_001014431	1734	TAGAAGACGCACCGGGGACTACTTGCACTTGGAGAAGTTAATATTCATAGCTTCTCCGAGTGCAGGTAGTCCTTTTTTGGCAAGCAAAAGACGGCATACGAGATACGTGTCAACTGGTCAACTTCGCCGTCTTCGT
AKT1|NM_001014431|1735	341	207	AKT1	NM_001014431	1735	TAGAAGACGCACCGGGATCCTCAAGAAGGAAGTTATGTTAATATTCATAGCATGACTTCCTTCTTGAGGATCTTTTTTGGCAAGCAAAAGACGGCATACGAGATCAGTGTCAACTGGTCATGTTCGCCGTCTTCGT
AKT1|NM_001014431|1736	342	207	AKT1	NM_001014431	1736	TAGAAGACGCACCGGGCCACGCTACTTTCTCCTTAAGTTAATATTCATAGCTTGAGGAGGAAGTAGCGTGGCTTTTTTGGCAAGCAAAAGACGGCATACGAGATGTGTGTCAACTGGTACGTTTCGCCGTCTTCGT
AKT1|NM_001014431|1737	343	207	AKT1	NM_001014431	1737	TAGAAGACGCACCGGGCATCGTTTCTTTGCTGGTATGTTAATATTCATAGCATACCGGCAAAGAAGCGATGCTTTTTTGGCAAGCAAAAGACGGCATACGAGATCAGTGTCAACTGGTACCATTCGCCGTCTTCGT
AKT1|NM_001014431|1738	344	207	AKT1	NM_001014431	1738	TAGAAGACGCACCGGCGCGTGACTATGAATGAGTTTGTTAATATTCATAGCAAACTCGTTCATGGTCACGCGTTTTTTGGCAAGCAAAAGACGGCATACGAGATTGGTGTCAACTGGTACACTTCGCCGTCTTCGT
ERG|NM_001136154|1739	345	2078	ERG	NM_001136154	1739	TAGAAGACGCACCGGGCTCATATCAAGGAAGTCTTAGTTAATATTCATAGCTAAGGCTTCCTTGATATGAGCTTTTTTGGCAAGCAAAAGACGGCATACGAGATACGTGTCAACTGGTACTGTTCGCCGTCTTCGT
ERG|NM_001136154|1740	346	2078	ERG	NM_001136154	1740	TAGAAGACGCACCGGGATGATGTTGATAAAGCCTTAGTTAATATTCATAGCTAAGGCTTTATCAACATCATCTTTTTTGGCAAGCAAAAGACGGCATACGAGATCAGTGTCAACTGGTTGGTTTCGCCGTCTTCGT
ERG|NM_001136154|1741	347	2078	ERG	NM_001136154	1741	TAGAAGACGCACCGGACAAGTAGCTGCCTTGTAAATGTTAATATTCATAGCATTTGCAAGGCGGCTACTTGTTTTTTTGGCAAGCAAAAGACGGCATACGAGATACGTGTCAACTGGTTGCATTCGCCGTCTTCGT
ERG|NM_001136154|1742	348	2078	ERG	NM_001136154	1742	TAGAAGACGCACCGGAGAGTTATTGTGCCAGTAGATGTTAATATTCATAGCATCTGCTGGCACGATAACTCTTTTTTTGGCAAGCAAAAGACGGCATACGAGATGTGTGTCAACTGGTTGACTTCGCCGTCTTCGT
ERG|NM_001136154|1743	349	2078	ERG	NM_001136154	1743	TAGAAGACGCACCGGCAAGGAACTCTCTTGATGAATGTTAATATTCATAGCATTCATCAGGAGAGTTCCTTGTTTTTTGGCAAGCAAAAGACGGCATACGAGATTGGTGTCAACTGGTTGTGTTCGCCGTCTTCGT
ERG|NM_001136154|1744	350	2078	ERG	NM_001136154	1744	TAGAAGACGCACCGGGAAGCCTTATTAGTTGTGAGTGTTAATATTCATAGCACTCACAACTGATAAGGCTTCTTTTTTGGCAAGCAAAAGACGGCATACGAGATCAGTGTCAACTGCAGTGTTTCGCCGTCTTCGT
ERG|NM_001136154|1745	351	2078	ERG	NM_001136154	1745	TAGAAGACGCACCGGGAGTGGGTGGTGAAAGAATGTGTTAATATTCATAGCATATTCTTTCACCGCCCACTCTTTTTTGGCAAGCAAAAGACGGCATACGAGATACGTGTCAACTGCAGTCATTCGCCGTCTTCGT
ERG|NM_001136154|1746	352	2078	ERG	NM_001136154	1746	TAGAAGACGCACCGGCGTCCTCAGTTAGATCTTTATGTTAATATTCATAGCATAAGGATCTAACTGAGGACGTTTTTTGGCAAGCAAAAGACGGCATACGAGATGTGTGTCAACTGCAGTACTTCGCCGTCTTCGT
AKT2|NM_001243027|1747	353	208	AKT2	NM_001243027	1747	TAGAAGACGCACCGGCGGGTTAAAGTGACTATGAATGTTAATATTCATAGCATTCATGGTCACTTTAGCCCGTTTTTTGGCAAGCAAAAGACGGCATACGAGATTGGTGTCAACTGCAGTTGTTCGCCGTCTTCGT
AKT2|NM_001243027|1748	354	208	AKT2	NM_001243027	1748	TAGAAGACGCACCGGCCCTTAAACAACTTCTTCGTAGTTAATATTCATAGCTACGGAGAAGTTGTTTAAGGGTTTTTTGGCAAGCAAAAGACGGCATACGAGATACGTGTCAACTGCACAGTTTCGCCGTCTTCGT
AKT2|NM_001243027|1749	355	208	AKT2	NM_001243027	1749	TAGAAGACGCACCGGCATGAATGAGGTGTCTGTTATGTTAATATTCATAGCATGACAGACACCTCATTCATGTTTTTTGGCAAGCAAAAGACGGCATACGAGATTGGTGTCAACTGCACACATTCGCCGTCTTCGT
AKT2|NM_001243027|1750	356	208	AKT2	NM_001243027	1750	TAGAAGACGCACCGGCAAGGTACTTTGATGATGAATGTTAATATTCATAGCATTCATCATCGAAGTACCTTGTTTTTTGGCAAGCAAAAGACGGCATACGAGATCAGTGTCAACTGCACAACTTCGCCGTCTTCGT
AKT2|NM_001243027|1751	357	208	AKT2	NM_001243027	1751	TAGAAGACGCACCGGACAAGGTACTTTGATGATGAAGTTAATATTCATAGCTTCATCATCGAAGTACCTTGTTTTTTTGGCAAGCAAAAGACGGCATACGAGATGTGTGTCAACTGCACATGTTCGCCGTCTTCGT
AKT2|NM_001243027|1752	358	208	AKT2	NM_001243027	1752	TAGAAGACGCACCGGAGCGTGGTGAATACATTAAGAGTTAATATTCATAGCTCTTGATGTATTCACCACGCTTTTTTTGGCAAGCAAAAGACGGCATACGAGATTGGTGTCAACTGCAACGTTTCGCCGTCTTCGT
AKT2|NM_001243027|1753	359	208	AKT2	NM_001243027	1753	TAGAAGACGCACCGGTACCGCCCAGTTCATCATAATGTTAATATTCATAGCATTGTGATGGACTGGGCGGTATTTTTTGGCAAGCAAAAGACGGCATACGAGATGTGTGTCAACTGCAACCATTCGCCGTCTTCGT
AKT2|NM_001243027|1754	360	208	AKT2	NM_001243027	1754	TAGAAGACGCACCGGAGGACTTTCCATGTGGATTCTGTTAATATTCATAGCAGAATCCACGTGGAAGGTCCTTTTTTTGGCAAGCAAAAGACGGCATACGAGATACGTGTCAACTGCAACACTTCGCCGTCTTCGT
ERN1|NM_001433|1755	361	2081	ERN1	NM_001433	1755	TAGAAGACGCACCGGCCCATTAACCTTTCTTCTGTAGTTAATATTCATAGCTACAGAAGAGAGGTTGATGGGTTTTTTGGCAAGCAAAAGACGGCATACGAGATCAGTGTCAACTGCAACTGTTCGCCGTCTTCGT
ERN1|NM_001433|1756	362	2081	ERN1	NM_001433	1756	TAGAAGACGCACCGGGCGTAAATTCAGGACTTATAAGTTAATATTCATAGCTTATAGGTCCTGAATTTACGCTTTTTTGGCAAGCAAAAGACGGCATACGAGATGTGTGTCAACTGCATGGTTTCGCCGTCTTCGT
ERN1|NM_001433|1757	363	2081	ERN1	NM_001433	1757	TAGAAGACGCACCGGACGCTTGGAAGTAAGAATAATGTTAATATTCATAGCATTATTCTTGCTTCCAAGCGTTTTTTTGGCAAGCAAAAGACGGCATACGAGATCAGTGTCAACTGCATGCATTCGCCGTCTTCGT
ERN1|NM_001433|1758	364	2081	ERN1	NM_001433	1758	TAGAAGACGCACCGGGCAGGACATTTGGTATGTTATGTTAATATTCATAGCATAACATACCAGATGTCCTGCTTTTTTGGCAAGCAAAAGACGGCATACGAGATTGGTGTCAACTGCATGACTTCGCCGTCTTCGT
ERN1|NM_001433|1759	365	2081	ERN1	NM_001433	1759	TAGAAGACGCACCGGTATACGCTTGGAAGTAAGAATGTTAATATTCATAGCATTCTTGCTTCCAAGCGTATATTTTTTGGCAAGCAAAAGACGGCATACGAGATACGTGTCAACTGCATGTGTTCGCCGTCTTCGT
ERN1|NM_001433|1760	366	2081	ERN1	NM_001433	1760	TAGAAGACGCACCGGAGACCTAAAGCCACATAACATGTTAATATTCATAGCATGTTGTGTGGCTTTAGGTCTTTTTTTGGCAAGCAAAAGACGGCATACGAGATGTGTGTCAACTGACGTGTTTCGCCGTCTTCGT
ERN1|NM_001433|1761	367	2081	ERN1	NM_001433	1761	TAGAAGACGCACCGGAGGACGTCATTGCATGTGAATGTTAATATTCATAGCATTCACGTGCAATGACGTCTTTTTTTTGGCAAGCAAAAGACGGCATACGAGATCAGTGTCAACTGACGTCATTCGCCGTCTTCGT
ERN1|NM_001433|1762	368	2081	ERN1	NM_001433	1762	TAGAAGACGCACCGGGCCTTTCTCCTAGATCTTAATGTTAATATTCATAGCATTAGGATCTGGGAGAAAGGCTTTTTTGGCAAGCAAAAGACGGCATACGAGATTGGTGTCAACTGACGTACTTCGCCGTCTTCGT
FBL|NM_001436|1763	369	2091	FBL	NM_001436	1763	TAGAAGACGCACCGGGACACTTTGTGATTTCCATTAGTTAATATTCATAGCTAATGGAAATCACAAAGTGTCTTTTTTGGCAAGCAAAAGACGGCATACGAGATACGTGTCAACTGACGTTGTTCGCCGTCTTCGT
FBL|NM_001436|1764	370	2091	FBL	NM_001436	1764	TAGAAGACGCACCGGGATTTCGGAAGGAGATGATAAGTTAATATTCATAGCTTGTCATCTCCTTCCGAAATCTTTTTTGGCAAGCAAAAGACGGCATACGAGATCAGTGTCAACTGACCAGTTTCGCCGTCTTCGT
FBL|NM_001436|1765	371	2091	FBL	NM_001436	1765	TAGAAGACGCACCGGGCAATGGTGGGTGTGGTCTTTGTTAATATTCATAGCAAAGATCACATCCACCATTGCTTTTTTGGCAAGCAAAAGACGGCATACGAGATACGTGTCAACTGACCACATTCGCCGTCTTCGT
FBL|NM_001436|1766	372	2091	FBL	NM_001436	1766	TAGAAGACGCACCGGGAGCCATATGAAAGAGATCATGTTAATATTCATAGCATGGTCTCTTTCATATGGCTCTTTTTTGGCAAGCAAAAGACGGCATACGAGATGTGTGTCAACTGACCAACTTCGCCGTCTTCGT
FBL|NM_001436|1767	373	2091	FBL	NM_001436	1767	TAGAAGACGCACCGGGACCAACATCATTCTTGTGATGTTAATATTCATAGCATCACAGGAATGATGTTGGTCTTTTTTGGCAAGCAAAAGACGGCATACGAGATTGGTGTCAACTGACCATGTTCGCCGTCTTCGT
FBL|NM_001436|1768	374	2091	FBL	NM_001436	1768	TAGAAGACGCACCGGCCTTGAGCTATATGAAAGAGAGTTAATATTCATAGCTCTCTTTCATATGGCTCAAGGTTTTTTGGCAAGCAAAAGACGGCATACGAGATACGTGTCAACTGACACGTTTCGCCGTCTTCGT
FBL|NM_001436|1769	375	2091	FBL	NM_001436	1769	TAGAAGACGCACCGGCAAGAAGAGGACCAATATCATGTTAATATTCATAGCATGATGTTGGTCCTCTTCTTGTTTTTTGGCAAGCAAAAGACGGCATACGAGATTGGTGTCAACTGACACCATTCGCCGTCTTCGT
FBL|NM_001436|1770	376	2091	FBL	NM_001436	1770	TAGAAGACGCACCGGGTCTTGATTTCGGAAGGAGGTGTTAATATTCATAGCATCTCCTTCCGAAATCGAGACTTTTTTGGCAAGCAAAAGACGGCATACGAGATCAGTGTCAACTGACACACTTCGCCGTCTTCGT
ESR1|NM_000125|1771	377	2099	ESR1	NM_000125	1771	TAGAAGACGCACCGGCTACAGGCCAAATTTAGATAAGTTAATATTCATAGCTTATCTGAATTTGGCCTGTAGTTTTTTGGCAAGCAAAAGACGGCATACGAGATGTGTGTCAACTGACACTGTTCGCCGTCTTCGT
ESR1|NM_000125|1772	378	2099	ESR1	NM_000125	1772	TAGAAGACGCACCGGGTGTGCCTCAAATCTATTATTGTTAATATTCATAGCAATAATAGATTTGAGGCACACTTTTTTGGCAAGCAAAAGACGGCATACGAGATTGGTGTCAACTGACTGGTTTCGCCGTCTTCGT
ESR1|NM_000125|1773	379	2099	ESR1	NM_000125	1773	TAGAAGACGCACCGGCAACCAGTGCACTATTGATAAGTTAATATTCATAGCTTATCAATGGTGCACTGGTTGTTTTTTGGCAAGCAAAAGACGGCATACGAGATGTGTGTCAACTGACTGCATTCGCCGTCTTCGT
ESR1|NM_000125|1774	380	2099	ESR1	NM_000125	1774	TAGAAGACGCACCGGAGGGAAGTATGGTTATGGAATGTTAATATTCATAGCATTCCATAGCCATACTTCCCTTTTTTTGGCAAGCAAAAGACGGCATACGAGATACGTGTCAACTGACTGACTTCGCCGTCTTCGT
ESR1|NM_000125|1775	381	2099	ESR1	NM_000125	1775	TAGAAGACGCACCGGAGGAGTTTGTGTGCCTTAAATGTTAATATTCATAGCATTTGAGGCACACAAACTCCTTTTTTTGGCAAGCAAAAGACGGCATACGAGATCAGTGTCAACTGACTGTGTTCGCCGTCTTCGT
ESR1|NM_000125|1776	382	2099	ESR1	NM_000125	1776	TAGAAGACGCACCGGGAGGAGGGAGAGTGTTGAAATGTTAATATTCATAGCGTTTCAACATTCTCCCTCCTCTTTTTTGGCAAGCAAAAGACGGCATACGAGATTGGTGTCAACTGTGGTGTTTCGCCGTCTTCGT
ESR1|NM_000125|1777	383	2099	ESR1	NM_000125	1777	TAGAAGACGCACCGGTATGCTTCAGGCTACTATTATGTTAATATTCATAGCATAATGGTAGCCTGAAGCATATTTTTTGGCAAGCAAAAGACGGCATACGAGATGTGTGTCAACTGTGGTCATTCGCCGTCTTCGT
ESR1|NM_000125|1778	384	2099	ESR1	NM_000125	1778	TAGAAGACGCACCGGGGCCTTCTTTAAGAGAAGTATGTTAATATTCATAGCATACTTCTCTTGAAGAAGGCCTTTTTTGGCAAGCAAAAGACGGCATACGAGATACGTGTCAACTGTGGTACTTCGCCGTCTTCGT
ABCA3|NM_001089|1779	385	21	ABCA3	NM_001089	1779	TAGAAGACGCACCGGGCTTGAAGATTCAGTTGGAAAGTTAATATTCATAGCTTTCCGACTGAATCTTCAAGCTTTTTTGGCAAGCAAAAGACGGCATACGAGATCAGTGTCAACTGTGGTTGTTCGCCGTCTTCGT
ABCA3|NM_001089|1780	386	21	ABCA3	NM_001089	1780	TAGAAGACGCACCGGGCCCAGCTTATTGGGAAGTTTGTTAATATTCATAGCAAATTTCCCAATGAGCTGGGCTTTTTTGGCAAGCAAAAGACGGCATACGAGATGTGTGTCAACTGTGCAGTTTCGCCGTCTTCGT
ABCA3|NM_001089|1781	387	21	ABCA3	NM_001089	1781	TAGAAGACGCACCGGGCTCCATACACCTTTGATTATGTTAATATTCATAGCATAATCAGAGGTGTGTGGAGCTTTTTTGGCAAGCAAAAGACGGCATACGAGATCAGTGTCAACTGTGCACATTCGCCGTCTTCGT
ABCA3|NM_001089|1782	388	21	ABCA3	NM_001089	1782	TAGAAGACGCACCGGGCATATATCAGTGGGTATGAAGTTAATATTCATAGCTTCATACCCGCTGATGTATGCTTTTTTGGCAAGCAAAAGACGGCATACGAGATTGGTGTCAACTGTGCAACTTCGCCGTCTTCGT
ABCA3|NM_001089|1783	389	21	ABCA3	NM_001089	1783	TAGAAGACGCACCGGCACTCAGAAATGAGTACTTTGGTTAATATTCATAGCCAAAGTACTCGTTTCTGAGTGTTTTTTGGCAAGCAAAAGACGGCATACGAGATACGTGTCAACTGTGCATGTTCGCCGTCTTCGT
ABCA3|NM_001089|1784	390	21	ABCA3	NM_001089	1784	TAGAAGACGCACCGGGCCCACTACTGTAAGAAATATGTTAATATTCATAGCATATTTCTTGCAGTAGTGGGCTTTTTTGGCAAGCAAAAGACGGCATACGAGATCAGTGTCAACTGTGACGTTTCGCCGTCTTCGT
ABCA3|NM_001089|1785	391	21	ABCA3	NM_001089	1785	TAGAAGACGCACCGGGTCTAATGTCGTCATGGTAATGTTAATATTCATAGCATTGCCATGGCGACATTAGACTTTTTTGGCAAGCAAAAGACGGCATACGAGATACGTGTCAACTGTGACCATTCGCCGTCTTCGT
ABCA3|NM_001089|1786	392	21	ABCA3	NM_001089	1786	TAGAAGACGCACCGGGGCGGATACTGATAGAATTATGTTAATATTCATAGCATAATTCTGTCAGTGTCCGCCTTTTTTGGCAAGCAAAAGACGGCATACGAGATGTGTGTCAACTGTGACACTTCGCCGTCTTCGT
ETS1|NM_001143820|1787	393	2113	ETS1	NM_001143820	1787	TAGAAGACGCACCGGCTGGAATTACTCACTGATAAAGTTAATATTCATAGCTTTATCAGTGAGTAATTCCAGTTTTTTGGCAAGCAAAAGACGGCATACGAGATTGGTGTCAACTGTGACTGTTCGCCGTCTTCGT
ETS1|NM_001143820|1788	394	2113	ETS1	NM_001143820	1788	TAGAAGACGCACCGGGCCCTGGGTGAAGATTGCTTTGTTAATATTCATAGCAAAGCAGTCTTTACCCAGGGCTTTTTTGGCAAGCAAAAGACGGCATACGAGATACGTGTCAACTGTGTGGTTTCGCCGTCTTCGT
ETS1|NM_001143820|1789	395	2113	ETS1	NM_001143820	1789	TAGAAGACGCACCGGGTGCAGATGTCCCATTATTAAGTTAATATTCATAGCTTAATAGTGGGACATCTGCACTTTTTTGGCAAGCAAAAGACGGCATACGAGATTGGTGTCAACTGTGTGCATTCGCCGTCTTCGT
ETS1|NM_001143820|1790	396	2113	ETS1	NM_001143820	1790	TAGAAGACGCACCGGGACCGTGTTGACCTTAATAAGGTTAATATTCATAGCCTTATTGAGGTCAGCACGGTCTTTTTTGGCAAGCAAAAGACGGCATACGAGATCAGTGTCAACTGTGTGACTTCGCCGTCTTCGT
ETS1|NM_001143820|1791	397	2113	ETS1	NM_001143820	1791	TAGAAGACGCACCGGACTGTGTCTTAGATATGGAATGTTAATATTCATAGCATTCCATATCTGAGACACAGTTTTTTTGGCAAGCAAAAGACGGCATACGAGATGTGTGTCAACTGTGTGTGTTCGCCGTCTTCGT
ETS1|NM_001143820|1792	398	2113	ETS1	NM_001143820	1792	TAGAAGACGCACCGGTGATGTGGGTTGTGAATGAATGTTAATATTCATAGCATTCATTCACAGCCCACATCATTTTTTGGCAAGCAAAAGACGGCATACGAGATTGGTGTCATGGTGTGTGTTTCGCCGTCTTCGT
ETS1|NM_001143820|1793	399	2113	ETS1	NM_001143820	1793	TAGAAGACGCACCGGGAGATGGTTGGGAATTCAAATGTTAATATTCATAGCGTTTGAATTCCCAGCCATCTCTTTTTTGGCAAGCAAAAGACGGCATACGAGATGTGTGTCATGGTGTGTCATTCGCCGTCTTCGT
ETS1|NM_001143820|1794	400	2113	ETS1	NM_001143820	1794	TAGAAGACGCACCGGGAATGAACTGTGGTTTCTAGTGTTAATATTCATAGCACTGGAAACCACAGTTCATTCTTTTTTGGCAAGCAAAAGACGGCATACGAGATACGTGTCATGGTGTGTACTTCGCCGTCTTCGT
ETS2|NM_001256295|1795	401	2114	ETS2	NM_001256295	1795	TAGAAGACGCACCGGCCTGGCTTTGTGGGTGATATTGTTAATATTCATAGCAATGTCACCCACAAAGTCAGGTTTTTTGGCAAGCAAAAGACGGCATACGAGATCAGTGTCATGGTGTGTTGTTCGCCGTCTTCGT
ETS2|NM_001256295|1796	402	2114	ETS2	NM_001256295	1796	TAGAAGACGCACCGGGCTGTGATGAGTTAAGCTTTAGTTAATATTCATAGCTAAGGCTTGACTCATCACAGCTTTTTTGGCAAGCAAAAGACGGCATACGAGATGTGTGTCATGGTGTCAGTTTCGCCGTCTTCGT
ETS2|NM_001256295|1797	403	2114	ETS2	NM_001256295	1797	TAGAAGACGCACCGGCGCCAATTGTGAATTGTCTTTGTTAATATTCATAGCAAAGGCAATTCACAGTTGGCGTTTTTTGGCAAGCAAAAGACGGCATACGAGATCAGTGTCATGGTGTCACATTCGCCGTCTTCGT
ETS2|NM_001256295|1798	404	2114	ETS2	NM_001256295	1798	TAGAAGACGCACCGGGGAGTAAGGCAAACTAGTTATGTTAATATTCATAGCATAACTGGTTTGCCTTGCTCCTTTTTTGGCAAGCAAAAGACGGCATACGAGATTGGTGTCATGGTGTCAACTTCGCCGTCTTCGT
ETS2|NM_001256295|1799	405	2114	ETS2	NM_001256295	1799	TAGAAGACGCACCGGTGGAGCTGCTATCAGATAAATGTTAATATTCATAGCATTTGTCTGATAGCAGCTCCATTTTTTGGCAAGCAAAAGACGGCATACGAGATACGTGTCATGGTGTCATGTTCGCCGTCTTCGT
ETS2|NM_001256295|1800	406	2114	ETS2	NM_001256295	1800	TAGAAGACGCACCGGTTCAGTCTGGTGAATGTGAATGTTAATATTCATAGCATTCACGTTCACCAGACTGAATTTTTTGGCAAGCAAAAGACGGCATACGAGATCAGTGTCATGGTGTACGTTTCGCCGTCTTCGT
ETS2|NM_001256295|1801	407	2114	ETS2	NM_001256295	1801	TAGAAGACGCACCGGGCTACCTTTAGTGGCTTTAAAGTTAATATTCATAGCTTTGAAGCCACTGAAGGTAGCTTTTTTGGCAAGCAAAAGACGGCATACGAGATACGTGTCATGGTGTACCATTCGCCGTCTTCGT
ETS2|NM_001256295|1802	408	2114	ETS2	NM_001256295	1802	TAGAAGACGCACCGGACAATTCTGGGATTCCTAAAGGTTAATATTCATAGCCTTTGGGAGTCCCAGAATTGTTTTTTTGGCAAGCAAAAGACGGCATACGAGATGTGTGTCATGGTGTACACTTCGCCGTCTTCGT
ETV6|NM_001987|1803	409	2120	ETV6	NM_001987	1803	TAGAAGACGCACCGGAGGAGCTGGATGAATAAATATGTTAATATTCATAGCATATTTGTTCATCCAGCTCCTTTTTTTGGCAAGCAAAAGACGGCATACGAGATTGGTGTCATGGTGTACTGTTCGCCGTCTTCGT
ETV6|NM_001987|1804	410	2120	ETV6	NM_001987	1804	TAGAAGACGCACCGGGCGCCACTACTACAAATTAAAGTTAATATTCATAGCTTTAGTTTGTAGTAGTGGCGCTTTTTTGGCAAGCAAAAGACGGCATACGAGATACGTGTCATGGTGTTGGTTTCGCCGTCTTCGT
ETV6|NM_001987|1805	411	2120	ETV6	NM_001987	1805	TAGAAGACGCACCGGGCTGCTGACTAAAGAGGATTTGTTAATATTCATAGCAAGTCCTCTTTGGTCAGCAGCTTTTTTGGCAAGCAAAAGACGGCATACGAGATTGGTGTCATGGTGTTGCATTCGCCGTCTTCGT
ETV6|NM_001987|1806	412	2120	ETV6	NM_001987	1806	TAGAAGACGCACCGGCCATAAGAACAGAACAAACATGTTAATATTCATAGCATGTTTGTTCTGTTCTTATGGTTTTTTGGCAAGCAAAAGACGGCATACGAGATCAGTGTCATGGTGTTGACTTCGCCGTCTTCGT
ETV6|NM_001987|1807	413	2120	ETV6	NM_001987	1807	TAGAAGACGCACCGGCTGCGCTTGCAGCTAATTTATGTTAATATTCATAGCGTAAATTGGCTGCAAGCGCAGTTTTTTGGCAAGCAAAAGACGGCATACGAGATGTGTGTCATGGTGTTGTGTTCGCCGTCTTCGT
ETV6|NM_001987|1808	414	2120	ETV6	NM_001987	1808	TAGAAGACGCACCGGGTGGATAATGTGCACTATAACGTTAATATTCATAGCGTTATGGTGCACATTATCCACTTTTTTGGCAAGCAAAAGACGGCATACGAGATACGTGTCATGGTCAGTGTTTCGCCGTCTTCGT
ETV6|NM_001987|1809	415	2120	ETV6	NM_001987	1809	TAGAAGACGCACCGGGAGGTCATACTGTATCAGAATGTTAATATTCATAGCGTTCTGATGCAGTATGACCTCTTTTTTGGCAAGCAAAAGACGGCATACGAGATTGGTGTCATGGTCAGTCATTCGCCGTCTTCGT
ETV6|NM_001987|1810	416	2120	ETV6	NM_001987	1810	TAGAAGACGCACCGGGCATTAAGCAGGAATGAATTTGTTAATATTCATAGCAAATTCGTTCCTGCTTAATGCTTTTTTGGCAAGCAAAAGACGGCATACGAGATCAGTGTCATGGTCAGTACTTCGCCGTCTTCGT
MECOM|NM_001105077|1811	417	2122	MECOM	NM_001105077	1811	TAGAAGACGCACCGGGCCGTTACATAGAAAGTCTAAGTTAATATTCATAGCTTGGACTTTCTGTGTAACGGCTTTTTTGGCAAGCAAAAGACGGCATACGAGATGTGTGTCATGGTCAGTTGTTCGCCGTCTTCGT
MECOM|NM_001105077|1812	418	2122	MECOM	NM_001105077	1812	TAGAAGACGCACCGGCCTTTCTTTATGGACCTTATTGTTAATATTCATAGCAATAGGGTCCATAAAGAAAGGTTTTTTGGCAAGCAAAAGACGGCATACGAGATTGGTGTCATGGTCACAGTTTCGCCGTCTTCGT
MECOM|NM_001105077|1813	419	2122	MECOM	NM_001105077	1813	TAGAAGACGCACCGGTCTGTGAGGTCTGCTATAAATGTTAATATTCATAGCATTTATGGCAGACCTCACAGATTTTTTGGCAAGCAAAAGACGGCATACGAGATGTGTGTCATGGTCACACATTCGCCGTCTTCGT
MECOM|NM_001105077|1814	420	2122	MECOM	NM_001105077	1814	TAGAAGACGCACCGGGTGCAAAGACTGTGGATAAATGTTAATATTCATAGCATTTGTCCACAGTCTTTGCACTTTTTTGGCAAGCAAAAGACGGCATACGAGATACGTGTCATGGTCACAACTTCGCCGTCTTCGT
MECOM|NM_001105077|1815	421	2122	MECOM	NM_001105077	1815	TAGAAGACGCACCGGAATGTGGAGGAGGGAATGGATGTTAATATTCATAGCATTCATTCTCTCCTCCACATTTTTTTTGGCAAGCAAAAGACGGCATACGAGATCAGTGTCATGGTCACATGTTCGCCGTCTTCGT
MECOM|NM_001105077|1816	422	2122	MECOM	NM_001105077	1816	TAGAAGACGCACCGGAAGGAACCAGTGATAAGTAATGTTAATATTCATAGCATTACTTGTCACTGGTTCCTTTTTTTTGGCAAGCAAAAGACGGCATACGAGATGTGTGTCATGGTCAACGTTTCGCCGTCTTCGT
MECOM|NM_001105077|1817	423	2122	MECOM	NM_001105077	1817	TAGAAGACGCACCGGGTGTTAGGAGTTGTGAATGATGTTAATATTCATAGCATCATTCACAGCTCCTGACACTTTTTTGGCAAGCAAAAGACGGCATACGAGATCAGTGTCATGGTCAACCATTCGCCGTCTTCGT
ALB|NM_000477|1818	424	213	ALB	NM_000477	1818	TAGAAGACGCACCGGGCTGAAACATTCACCTTTCATGTTAATATTCATAGCATGGAAGGTGAATGTTTCAGCTTTTTTGGCAAGCAAAAGACGGCATACGAGATTGGTGTCATGGTCAACACTTCGCCGTCTTCGT
ALB|NM_000477|1819	425	213	ALB	NM_000477	1819	TAGAAGACGCACCGGGTTGCTCATTGGTTTAAAGATGTTAATATTCATAGCATCTTTAAACCGATGAGCAACTTTTTTGGCAAGCAAAAGACGGCATACGAGATACGTGTCATGGTCAACTGTTCGCCGTCTTCGT
ALB|NM_000477|1820	426	213	ALB	NM_000477	1820	TAGAAGACGCACCGGTCACCTTCCATGTAGATATATGTTAATATTCATAGCATATATCTGCATGGAAGGTGATTTTTTGGCAAGCAAAAGACGGCATACGAGATCAGTGTCATGGTCATGGTTTCGCCGTCTTCGT
ALB|NM_000477|1821	427	213	ALB	NM_000477	1821	TAGAAGACGCACCGGTAAGTGACAGAGTCACTAAATGTTAATATTCATAGCATTTGGTGACTCTGTCACTTATTTTTTGGCAAGCAAAAGACGGCATACGAGATACGTGTCATGGTCATGCATTCGCCGTCTTCGT
ALB|NM_000477|1822	428	213	ALB	NM_000477	1822	TAGAAGACGCACCGGTTCTGAGAAGGAGAGATAAATGTTAATATTCATAGCATTTGTCTCTCCTTCTCAGAATTTTTTGGCAAGCAAAAGACGGCATACGAGATGTGTGTCATGGTCATGACTTCGCCGTCTTCGT
ALB|NM_000477|1823	429	213	ALB	NM_000477	1823	TAGAAGACGCACCGGGTTGAGCTTGTGAAACATAAGGTTAATATTCATAGCCTTGTGTTTCACGAGCTCAACTTTTTTGGCAAGCAAAAGACGGCATACGAGATTGGTGTCATGGTCATGTGTTCGCCGTCTTCGT
ALB|NM_000477|1824	430	213	ALB	NM_000477	1824	TAGAAGACGCACCGGTCGTGAAACTTATGGTGAAATGTTAATATTCATAGCATTTCACCATAGGTTTCACGATTTTTTGGCAAGCAAAAGACGGCATACGAGATCAGTGTCATGGTACGTGTTTCGCCGTCTTCGT
ALB|NM_000477|1825	431	213	ALB	NM_000477	1825	TAGAAGACGCACCGGGAATGCTTCTTGCAACATAAAGTTAATATTCATAGCTTTGTGTTGCAAGAAGCATTCTTTTTTGGCAAGCAAAAGACGGCATACGAGATACGTGTCATGGTACGTCATTCGCCGTCTTCGT
EWSR1|NM_001163285|1826	432	2130	EWSR1	NM_001163285	1826	TAGAAGACGCACCGGGACCGCTTATGCAATTTCTTAGTTAATATTCATAGCTAAGAAGTTGCATAGGCGGTCTTTTTTGGCAAGCAAAAGACGGCATACGAGATGTGTGTCATGGTACGTACTTCGCCGTCTTCGT
EWSR1|NM_001163285|1827	433	2130	EWSR1	NM_001163285	1827	TAGAAGACGCACCGGAGAGTGAGGTGGCTTTAATAAGTTAATATTCATAGCTTATTGAAGCCACCTCGCTCTTTTTTTGGCAAGCAAAAGACGGCATACGAGATTGGTGTCATGGTACGTTGTTCGCCGTCTTCGT
EWSR1|NM_001163285|1828	434	2130	EWSR1	NM_001163285	1828	TAGAAGACGCACCGGTATGCAGCTCAGTCTGTATATGTTAATATTCATAGCATATGCAGACTGAGCTGCATATTTTTTGGCAAGCAAAAGACGGCATACGAGATACGTGTCATGGTACCAGTTTCGCCGTCTTCGT
EWSR1|NM_001163285|1829	435	2130	EWSR1	NM_001163285	1829	TAGAAGACGCACCGGGACTCTGACAACAGTGTAATTGTTAATATTCATAGCAATTGCACTGTTGTCAGAGTCTTTTTTGGCAAGCAAAAGACGGCATACGAGATTGGTGTCATGGTACCACATTCGCCGTCTTCGT
EWSR1|NM_001163285|1830	436	2130	EWSR1	NM_001163285	1830	TAGAAGACGCACCGGAATGACAGTGTGACTTTAGATGTTAATATTCATAGCATCTAGAGTCACACTGTCATTTTTTTTGGCAAGCAAAAGACGGCATACGAGATCAGTGTCATGGTACCAACTTCGCCGTCTTCGT
EWSR1|NM_001163285|1831	437	2130	EWSR1	NM_001163285	1831	TAGAAGACGCACCGGGAGTAGCTATGGTCAATAAAGGTTAATATTCATAGCCTTTGTTGACCATAGCTACTCTTTTTTGGCAAGCAAAAGACGGCATACGAGATGTGTGTCATGGTACCATGTTCGCCGTCTTCGT
EWSR1|NM_001163285|1832	438	2130	EWSR1	NM_001163285	1832	TAGAAGACGCACCGGGGTGCTTATGATATCACCATTGTTAATATTCATAGCAGTGGTGGTATCATAAGCACCTTTTTTGGCAAGCAAAAGACGGCATACGAGATTGGTGTCATGGTACACGTTTCGCCGTCTTCGT
EWSR1|NM_001163285|1833	439	2130	EWSR1	NM_001163285	1833	TAGAAGACGCACCGGTGGACCTTTGATGGAATAGATGTTAATATTCATAGCATCTGTTCCATCAAAGGTCCATTTTTTGGCAAGCAAAAGACGGCATACGAGATGTGTGTCATGGTACACCATTCGCCGTCTTCGT
EZH1|NM_001991|1834	440	2145	EZH1	NM_001991	1834	TAGAAGACGCACCGGGCTACTCGGAAAGGAAATAAAGTTAATATTCATAGCTTTGTTTCCTTTCCGAGTAGCTTTTTTGGCAAGCAAAAGACGGCATACGAGATACGTGTCATGGTACACACTTCGCCGTCTTCGT
EZH1|NM_001991|1835	441	2145	EZH1	NM_001991	1835	TAGAAGACGCACCGGGCTTCCTCTTCAACCTTAATAGTTAATATTCATAGCTATTGAGGTTGAAGAGGAAGCTTTTTTGGCAAGCAAAAGACGGCATACGAGATCAGTGTCATGGTACACTGTTCGCCGTCTTCGT
EZH1|NM_001991|1836	442	2145	EZH1	NM_001991	1836	TAGAAGACGCACCGGGGATCTGTTCTGATTAGTGATGTTAATATTCATAGCATCACTAATCAGAACGGATCCTTTTTTGGCAAGCAAAAGACGGCATACGAGATGTGTGTCATGGTACTGGTTTCGCCGTCTTCGT
EZH1|NM_001991|1837	443	2145	EZH1	NM_001991	1837	TAGAAGACGCACCGGGCCAAAGTGGTTATGGTGAGTGTTAATATTCATAGCATTCACCATGACCACTTTGGCTTTTTTGGCAAGCAAAAGACGGCATACGAGATCAGTGTCATGGTACTGCATTCGCCGTCTTCGT
EZH1|NM_001991|1838	444	2145	EZH1	NM_001991	1838	TAGAAGACGCACCGGGGGATTTGCAAGCCAATATATGTTAATATTCATAGCATATGTTGGCTTGCAAATCCCTTTTTTGGCAAGCAAAAGACGGCATACGAGATTGGTGTCATGGTACTGACTTCGCCGTCTTCGT
EZH1|NM_001991|1839	445	2145	EZH1	NM_001991	1839	TAGAAGACGCACCGGGCGGAAAGGTCTATGATAAATGTTAATATTCATAGCATTTGTCATAGACCTTTCCGCTTTTTTGGCAAGCAAAAGACGGCATACGAGATACGTGTCATGGTACTGTGTTCGCCGTCTTCGT
EZH1|NM_001991|1840	446	2145	EZH1	NM_001991	1840	TAGAAGACGCACCGGGATCTTTGCTAAGAGGGTAATGTTAATATTCATAGCATTGCCCTCTTGGCAAAGATCTTTTTTGGCAAGCAAAAGACGGCATACGAGATGTGTGTCATGGTTGGTGTTTCGCCGTCTTCGT
EZH1|NM_001991|1841	447	2145	EZH1	NM_001991	1841	TAGAAGACGCACCGGTAAACGGCTTCAGGTAAATATGTTAATATTCATAGCATATTTGCCTGAAGCCGTTTATTTTTTGGCAAGCAAAAGACGGCATACGAGATCAGTGTCATGGTTGGTCATTCGCCGTCTTCGT
F2|NM_000506|1842	448	2147	F2	NM_000506	1842	TAGAAGACGCACCGGGCATGTTTGGAAGGTAATTGTGTTAATATTCATAGCACAGTTACCTTCCAGACATGCTTTTTTGGCAAGCAAAAGACGGCATACGAGATTGGTGTCATGGTTGGTACTTCGCCGTCTTCGT
F2|NM_000506|1843	449	2147	F2	NM_000506	1843	TAGAAGACGCACCGGTGTGACTGGGATGGGAAATGTGTTAATATTCATAGCATATTTCCCATCCCGGTCACATTTTTTGGCAAGCAAAAGACGGCATACGAGATACGTGTCATGGTTGGTTGTTCGCCGTCTTCGT
F2|NM_000506|1844	450	2147	F2	NM_000506	1844	TAGAAGACGCACCGGGGTACTGCGATCTCAATTATTGTTAATATTCATAGCAATAGTTGAGGTCGCAGTACCTTTTTTGGCAAGCAAAAGACGGCATACGAGATCAGTGTCATGGTTGCAGTTTCGCCGTCTTCGT
F2|NM_000506|1845	451	2147	F2	NM_000506	1845	TAGAAGACGCACCGGTAACAACCGCTGGTATTAAATGTTAATATTCATAGCATTTGATACCAGCGGTTGTTATTTTTTGGCAAGCAAAAGACGGCATACGAGATACGTGTCATGGTTGCACATTCGCCGTCTTCGT
F2|NM_000506|1846	452	2147	F2	NM_000506	1846	TAGAAGACGCACCGGAGAGCTCTTGGAATCCTATATGTTAATATTCATAGCATGTAGGATTCCAGGAGCTCTTTTTTTGGCAAGCAAAAGACGGCATACGAGATGTGTGTCATGGTTGCAACTTCGCCGTCTTCGT
F2|NM_000506|1847	453	2147	F2	NM_000506	1847	TAGAAGACGCACCGGGTTGCCTTCAGTGACTATATTGTTAATATTCATAGCAATGTAGTCACTGAAGGCAACTTTTTTGGCAAGCAAAAGACGGCATACGAGATTGGTGTCATGGTTGCATGTTCGCCGTCTTCGT
F2|NM_000506|1848	454	2147	F2	NM_000506	1848	TAGAAGACGCACCGGGGTACGAGCGAAATATTGAAAGTTAATATTCATAGCTTTCAATGTTTCGCTCGTACCTTTTTTGGCAAGCAAAAGACGGCATACGAGATACGTGTCATGGTTGACGTTTCGCCGTCTTCGT
F2|NM_000506|1849	455	2147	F2	NM_000506	1849	TAGAAGACGCACCGGATTGCCTTGATGAAGTTGAAGGTTAATATTCATAGCCTTCAGCTTCATCAGGGCAATTTTTTTGGCAAGCAAAAGACGGCATACGAGATTGGTGTCATGGTTGACCATTCGCCGTCTTCGT
F3|NM_001178096|1850	456	2152	F3	NM_001178096	1850	TAGAAGACGCACCGGGTAGAAGATGAATGGACTTTAGTTAATATTCATAGCTAAAGTCCGTTCATCTTCTACTTTTTTGGCAAGCAAAAGACGGCATACGAGATCAGTGTCATGGTTGACACTTCGCCGTCTTCGT
F3|NM_001178096|1851	457	2152	F3	NM_001178096	1851	TAGAAGACGCACCGGACAAATACTGTGGCAGTATATGTTAATATTCATAGCATATGCTGCCACAGTATTTGTTTTTTTGGCAAGCAAAAGACGGCATACGAGATGTGTGTCATGGTTGACTGTTCGCCGTCTTCGT
F3|NM_001178096|1852	458	2152	F3	NM_001178096	1852	TAGAAGACGCACCGGACATCATTGGAGTTGTGGTATGTTAATATTCATAGCATACCACAGCTCCAATGATGTTTTTTTGGCAAGCAAAAGACGGCATACGAGATTGGTGTCATGGTTGTGGTTTCGCCGTCTTCGT
F3|NM_001178096|1853	459	2152	F3	NM_001178096	1853	TAGAAGACGCACCGGGAGATTGTGAAGGGTGTGGAGGTTAATATTCATAGCCTTCACATCCTTCACAATCTCTTTTTTGGCAAGCAAAAGACGGCATACGAGATGTGTGTCATGGTTGTGCATTCGCCGTCTTCGT
F3|NM_001178096|1854	460	2152	F3	NM_001178096	1854	TAGAAGACGCACCGGTCTCTACATAAGTGTAGAAAGGTTAATATTCATAGCCTTTCTACACTTGTGTAGAGATTTTTTGGCAAGCAAAAGACGGCATACGAGATACGTGTCATGGTTGTGACTTCGCCGTCTTCGT
F3|NM_001178096|1855	461	2152	F3	NM_001178096	1855	TAGAAGACGCACCGGACTACTGTTTCAGTGTTTAAGGTTAATATTCATAGCCTTGAACACTGAAACAGTAGTTTTTTTGGCAAGCAAAAGACGGCATACGAGATCAGTGTCATGGTTGTGTGTTCGCCGTCTTCGT
F3|NM_001178096|1856	462	2152	F3	NM_001178096	1856	TAGAAGACGCACCGGTGATTGATGTGGATGAAGGGGGTTAATATTCATAGCCTCCTTTATCCACATCAATCATTTTTTGGCAAGCAAAAGACGGCATACGAGATACGTGTCATGCAGTGTGTTTCGCCGTCTTCGT
F3|NM_001178096|1857	463	2152	F3	NM_001178096	1857	TAGAAGACGCACCGGACACCTTACTTGGAGACAAATGTTAATATTCATAGCGTTTGTCTCCAGGTAAGGTGTTTTTTTGGCAAGCAAAAGACGGCATACGAGATTGGTGTCATGCAGTGTCATTCGCCGTCTTCGT
F5|NM_000130|1858	464	2153	F5	NM_000130	1858	TAGAAGACGCACCGGGCTGAAATTTAGGGATGTTAAGTTAATATTCATAGCTTAACATCCCTGAATTTCAGCTTTTTTGGCAAGCAAAAGACGGCATACGAGATCAGTGTCATGCAGTGTACTTCGCCGTCTTCGT
F5|NM_000130|1859	465	2153	F5	NM_000130	1859	TAGAAGACGCACCGGCCACCTATTGTGGTTAGATATGTTAATATTCATAGCATATCTAGCCACAATAGGTGGTTTTTTGGCAAGCAAAAGACGGCATACGAGATGTGTGTCATGCAGTGTTGTTCGCCGTCTTCGT
F5|NM_000130|1860	466	2153	F5	NM_000130	1860	TAGAAGACGCACCGGGATCAAGAAGATAACGGTAATGTTAATATTCATAGCATTGCCGTTATCTTCTTGATCTTTTTTGGCAAGCAAAAGACGGCATACGAGATTGGTGTCATGCAGTCAGTTTCGCCGTCTTCGT
F5|NM_000130|1861	467	2153	F5	NM_000130	1861	TAGAAGACGCACCGGGACTAAGCACTGGTATTATATGTTAATATTCATAGCATATGATACCAGTGCTTAGTCTTTTTTGGCAAGCAAAAGACGGCATACGAGATGTGTGTCATGCAGTCACATTCGCCGTCTTCGT
F5|NM_000130|1862	468	2153	F5	NM_000130	1862	TAGAAGACGCACCGGTTTCACTTGGTGTTGGAGAATGTTAATATTCATAGCATTCTCCAGCACCAAGTGAAATTTTTTGGCAAGCAAAAGACGGCATACGAGATACGTGTCATGCAGTCAACTTCGCCGTCTTCGT
F5|NM_000130|1863	469	2153	F5	NM_000130	1863	TAGAAGACGCACCGGAGGTCTCAGTATTTGGATAATGTTAATATTCATAGCATTATCCAAATGCTGAGACCTTTTTTTGGCAAGCAAAAGACGGCATACGAGATCAGTGTCATGCAGTCATGTTCGCCGTCTTCGT
F7|NM_000131|1864	470	2155	F7	NM_000131	1864	TAGAAGACGCACCGGCAGGTCTTGTTGTTGGTGAGTGTTAATATTCATAGCATTCACCAACAACAGGACCTGTTTTTTGGCAAGCAAAAGACGGCATACGAGATGTGTGTCATGCAGTACGTTTCGCCGTCTTCGT
F7|NM_000131|1865	471	2155	F7	NM_000131	1865	TAGAAGACGCACCGGCAAGAATTGGAGGAACTTGATGTTAATATTCATAGCATCAGGTTCCTCCAGTTCTTGTTTTTTGGCAAGCAAAAGACGGCATACGAGATCAGTGTCATGCAGTACCATTCGCCGTCTTCGT
F7|NM_000131|1866	472	2155	F7	NM_000131	1866	TAGAAGACGCACCGGAGGATGAAGTTGTTCTGGATTGTTAATATTCATAGCAATCCAGAACAGCTTCGTCCTTTTTTTGGCAAGCAAAAGACGGCATACGAGATTGGTGTCATGCAGTACACTTCGCCGTCTTCGT
F7|NM_000131|1867	473	2155	F7	NM_000131	1867	TAGAAGACGCACCGGAATCAAGAACTGGAGGAATCTGTTAATATTCATAGCAGGTTCCTCCAGTTCTTGATTTTTTTTGGCAAGCAAAAGACGGCATACGAGATACGTGTCATGCAGTACTGTTCGCCGTCTTCGT
F7|NM_000131|1868	474	2155	F7	NM_000131	1868	TAGAAGACGCACCGGGAAGTTGTTCTGGATTTCTTAGTTAATATTCATAGCTAAGAAATCCAGAACAGCTTCTTTTTTGGCAAGCAAAAGACGGCATACGAGATCAGTGTCATGCAGTTGGTTTCGCCGTCTTCGT
F7|NM_000131|1869	475	2155	F7	NM_000131	1869	TAGAAGACGCACCGGTGATCTGTGTGAATGAGAATGGTTAATATTCATAGCCGTTCTCGTTCACACAGATCATTTTTTGGCAAGCAAAAGACGGCATACGAGATACGTGTCATGCAGTTGCATTCGCCGTCTTCGT
F7|NM_000131|1870	476	2155	F7	NM_000131	1870	TAGAAGACGCACCGGAAGGATGACTAGCTGATTTGTGTTAATATTCATAGCACAGATCAGCTGGTCATCCTTTTTTTTGGCAAGCAAAAGACGGCATACGAGATGTGTGTCATGCAGTTGACTTCGCCGTCTTCGT
F7|NM_000131|1871	477	2155	F7	NM_000131	1871	TAGAAGACGCACCGGAAGCTGTTCTGGATTTCTTATGTTAATATTCATAGCGTAAGAAATCCAGAACAGCTTTTTTTTGGCAAGCAAAAGACGGCATACGAGATTGGTGTCATGCAGTTGTGTTCGCCGTCTTCGT
ALDH1A1|NM_000689|1872	478	216	ALDH1A1	NM_000689	1872	TAGAAGACGCACCGGGCCAAATCATTCTTTGGAATTGTTAATATTCATAGCAATTCCAAGGAATGATTTGGCTTTTTTGGCAAGCAAAAGACGGCATACGAGATCAGTGTCATGCACAGTGTTTCGCCGTCTTCGT
ALDH1A1|NM_000689|1873	479	216	ALDH1A1	NM_000689	1873	TAGAAGACGCACCGGCGGGCTAAGAAGTATATTCTTGTTAATATTCATAGCAAGGATATACTTCTTAGCCCGTTTTTTGGCAAGCAAAAGACGGCATACGAGATACGTGTCATGCACAGTCATTCGCCGTCTTCGT
ALDH1A1|NM_000689|1874	480	216	ALDH1A1	NM_000689	1874	TAGAAGACGCACCGGCACCGATTTGAAGATTCAATAGTTAATATTCATAGCTATTGAATCTTCAAATCGGTGTTTTTTGGCAAGCAAAAGACGGCATACGAGATGTGTGTCATGCACAGTACTTCGCCGTCTTCGT
ALDH1A1|NM_000689|1875	481	216	ALDH1A1	NM_000689	1875	TAGAAGACGCACCGGGCTGATTTAATCGAAAGAGATGTTAATATTCATAGCATCTCTTTCGATTAAATCAGCTTTTTTGGCAAGCAAAAGACGGCATACGAGATTGGTGTCATGCACAGTTGTTCGCCGTCTTCGT
ALDH1A1|NM_000689|1876	482	216	ALDH1A1	NM_000689	1876	TAGAAGACGCACCGGGGATTCAAGATGTTTGGAAATGTTAATATTCATAGCATTTCCAGACATCTTGAATCCTTTTTTGGCAAGCAAAAGACGGCATACGAGATACGTGTCATGCACACAGTTTCGCCGTCTTCGT
ALDH1A1|NM_000689|1877	483	216	ALDH1A1	NM_000689	1877	TAGAAGACGCACCGGCAGCCCATAGTGTTCTTTAATGTTAATATTCATAGCATTAGAGAACACTGTGGGCTGTTTTTTGGCAAGCAAAAGACGGCATACGAGATTGGTGTCATGCACACACATTCGCCGTCTTCGT
ALDH1A1|NM_000689|1878	484	216	ALDH1A1	NM_000689	1878	TAGAAGACGCACCGGGAGAGTACGGTTTCTATGAATGTTAATATTCATAGCATTCATGGAAACCGTACTCTCTTTTTTGGCAAGCAAAAGACGGCATACGAGATCAGTGTCATGCACACAACTTCGCCGTCTTCGT
ALDH1A1|NM_000689|1879	485	216	ALDH1A1	NM_000689	1879	TAGAAGACGCACCGGGCGACAATGGAGTTAATGAATGTTAATATTCATAGCATTCATTGACTCCATTGTCGCTTTTTTGGCAAGCAAAAGACGGCATACGAGATGTGTGTCATGCACACATGTTCGCCGTCTTCGT
FANCA|NM_000135|1880	486	2175	FANCA	NM_000135	1880	TAGAAGACGCACCGGGCCGATCTTAAGGTTTCTATAGTTAATATTCATAGCTATAGAAACCTTGAGGTCGGCTTTTTTGGCAAGCAAAAGACGGCATACGAGATTGGTGTCATGCACAACGTTTCGCCGTCTTCGT
FANCA|NM_000135|1881	487	2175	FANCA	NM_000135	1881	TAGAAGACGCACCGGGCACAGGAAATGGGGATGTTAGTTAATATTCATAGCTAATATCCTCATTTCCTGTGCTTTTTTGGCAAGCAAAAGACGGCATACGAGATGTGTGTCATGCACAACCATTCGCCGTCTTCGT
FANCA|NM_000135|1882	488	2175	FANCA	NM_000135	1882	TAGAAGACGCACCGGCAGAGTTCTTTGTTGTTTGAAGTTAATATTCATAGCTTCAAGCAACAAAGAACTCTGTTTTTTGGCAAGCAAAAGACGGCATACGAGATACGTGTCATGCACAACACTTCGCCGTCTTCGT
FANCA|NM_000135|1883	489	2175	FANCA	NM_000135	1883	TAGAAGACGCACCGGGCTGCTAATGTACAAATGGATGTTAATATTCATAGCATCCGTTTGTACATTAGCAGCTTTTTTGGCAAGCAAAAGACGGCATACGAGATCAGTGTCATGCACAACTGTTCGCCGTCTTCGT
FANCA|NM_000135|1884	490	2175	FANCA	NM_000135	1884	TAGAAGACGCACCGGGACTCCTGTGTGGTGTTTATAGTTAATATTCATAGCTATAAACGCCACACGGGAGTCTTTTTTGGCAAGCAAAAGACGGCATACGAGATGTGTGTCATGCACATGGTTTCGCCGTCTTCGT
FANCA|NM_000135|1885	491	2175	FANCA	NM_000135	1885	TAGAAGACGCACCGGCTTATCTCCAGGCTTTATTAAGTTAATATTCATAGCTTAATAAGGCCTGGAGATAAGTTTTTTGGCAAGCAAAAGACGGCATACGAGATCAGTGTCATGCACATGCATTCGCCGTCTTCGT
FANCA|NM_000135|1886	492	2175	FANCA	NM_000135	1886	TAGAAGACGCACCGGGTTACACTTGGAGTTGGAAATGTTAATATTCATAGCATTTCCAGCTCCAGGTGTAACTTTTTTGGCAAGCAAAAGACGGCATACGAGATTGGTGTCATGCACATGACTTCGCCGTCTTCGT
FANCA|NM_000135|1887	493	2175	FANCA	NM_000135	1887	TAGAAGACGCACCGGGTGTTTAGAGAAGGGGAAGGTGTTAATATTCATAGCATCTTCCTCTTCTCTAAACACTTTTTTGGCAAGCAAAAGACGGCATACGAGATACGTGTCATGCACATGTGTTCGCCGTCTTCGT
ACSL3|NM_004457|1888	494	2181	ACSL3	NM_004457	1888	TAGAAGACGCACCGGGCCCTCAGATATTGTAGTAATGTTAATATTCATAGCATTACTGCAATATCTGAGGGCTTTTTTGGCAAGCAAAAGACGGCATACGAGATGTGTGTCATGCAACGTGTTTCGCCGTCTTCGT
ACSL3|NM_004457|1889	495	2181	ACSL3	NM_004457	1889	TAGAAGACGCACCGGGCGGATATTGAGTGAATGTATGTTAATATTCATAGCATACATTCGCTCAATGTCCGCTTTTTTGGCAAGCAAAAGACGGCATACGAGATCAGTGTCATGCAACGTCATTCGCCGTCTTCGT
ACSL3|NM_004457|1890	496	2181	ACSL3	NM_004457	1890	TAGAAGACGCACCGGGCTGTGTAATAGTTGTGAAATGTTAATATTCATAGCATTTCACAACTGTTACACAGCTTTTTTGGCAAGCAAAAGACGGCATACGAGATTGGTGTCATGCAACGTACTTCGCCGTCTTCGT
ACSL3|NM_004457|1891	497	2181	ACSL3	NM_004457	1891	TAGAAGACGCACCGGCCTGGATGTGATGCTTTAGGTGTTAATATTCATAGCATCTAAAGTATCACATCCAGGTTTTTTGGCAAGCAAAAGACGGCATACGAGATACGTGTCATGCAACGTTGTTCGCCGTCTTCGT
ACSL3|NM_004457|1892	498	2181	ACSL3	NM_004457	1892	TAGAAGACGCACCGGGCCTTCAAGTTGAAACGTAAAGTTAATATTCATAGCTTTGCGTTTCAGCTTGAAGGCTTTTTTGGCAAGCAAAAGACGGCATACGAGATCAGTGTCATGCAACCAGTTTCGCCGTCTTCGT
ACSL3|NM_004457|1893	499	2181	ACSL3	NM_004457	1893	TAGAAGACGCACCGGGAACCTGATGGATGTTTAAAGGTTAATATTCATAGCCTTTAAGCATCCATCGGGTTCTTTTTTGGCAAGCAAAAGACGGCATACGAGATACGTGTCATGCAACCACATTCGCCGTCTTCGT
ACSL3|NM_004457|1894	500	2181	ACSL3	NM_004457	1894	TAGAAGACGCACCGGGTCTTTGTTCGAGTCTTTAATGTTAATATTCATAGCATTAAAGGCTCGAACAAAGACTTTTTTGGCAAGCAAAAGACGGCATACGAGATGTGTGTCATGCAACCAACTTCGCCGTCTTCGT
ACSL3|NM_004457|1895	501	2181	ACSL3	NM_004457	1895	TAGAAGACGCACCGGCCAGAATTAGGAGAGGAAGGTGTTAATATTCATAGCATCTTCCTCTCCTAGTTCTGGTTTTTTGGCAAGCAAAAGACGGCATACGAGATTGGTGTCATGCAACCATGTTCGCCGTCTTCGT
PTK2B|NM_004103|1896	502	2185	PTK2B	NM_004103	1896	TAGAAGACGCACCGGCGTGAAGGTGTGGTCTTGAATGTTAATATTCATAGCATTCAGGACCACATCTTCACGTTTTTTGGCAAGCAAAAGACGGCATACGAGATACGTGTCATGCAACACGTTTCGCCGTCTTCGT
PTK2B|NM_004103|1897	503	2185	PTK2B	NM_004103	1897	TAGAAGACGCACCGGCATTCAAGGATGGAATATTACGTTAATATTCATAGCGTAATGTTCCATCCTTGAATGTTTTTTGGCAAGCAAAAGACGGCATACGAGATTGGTGTCATGCAACACCATTCGCCGTCTTCGT
PTK2B|NM_004103|1898	504	2185	PTK2B	NM_004103	1898	TAGAAGACGCACCGGGATGACTTGGTGTACCTTAATGTTAATATTCATAGCATTGAGGTACACCAGGTCATCTTTTTTGGCAAGCAAAAGACGGCATACGAGATCAGTGTCATGCAACACACTTCGCCGTCTTCGT
PTK2B|NM_004103|1899	505	2185	PTK2B	NM_004103	1899	TAGAAGACGCACCGGCGTATCCTTAAGGTCTGTTTCGTTAATATTCATAGCGAAGCAGACCTTGAGGATACGTTTTTTGGCAAGCAAAAGACGGCATACGAGATGTGTGTCATGCAACACTGTTCGCCGTCTTCGT
PTK2B|NM_004103|1900	506	2185	PTK2B	NM_004103	1900	TAGAAGACGCACCGGGCCGTCATCTTTACGGATAGAGTTAATATTCATAGCTCTGTCCGTGAAGATGACGGCTTTTTTGGCAAGCAAAAGACGGCATACGAGATTGGTGTCATGCAACTGGTTTCGCCGTCTTCGT
PTK2B|NM_004103|1901	507	2185	PTK2B	NM_004103	1901	TAGAAGACGCACCGGGATGTGGTCCTGAATTGTATTGTTAATATTCATAGCAATACGATTCAGGACCACATCTTTTTTGGCAAGCAAAAGACGGCATACGAGATGTGTGTCATGCAACTGCATTCGCCGTCTTCGT
PTK2B|NM_004103|1902	508	2185	PTK2B	NM_004103	1902	TAGAAGACGCACCGGTGCAGCCTTAGTGATGTTTATGTTAATATTCATAGCATAAACGTCACTGAGGCTGCATTTTTTGGCAAGCAAAAGACGGCATACGAGATACGTGTCATGCAACTGACTTCGCCGTCTTCGT
PTK2B|NM_004103|1903	509	2185	PTK2B	NM_004103	1903	TAGAAGACGCACCGGGAGTATCCATCTCCTGTTAATGTTAATATTCATAGCGTTAACGGGAGATGGATACTCTTTTTTGGCAAGCAAAAGACGGCATACGAGATCAGTGTCATGCAACTGTGTTCGCCGTCTTCGT
FANCG|NM_004629|1904	510	2189	FANCG	NM_004629	1904	TAGAAGACGCACCGGGCCAAGGTCTTGTGACTTGTAGTTAATATTCATAGCTACAGGTCACAAGACTTTGGCTTTTTTGGCAAGCAAAAGACGGCATACGAGATTGGTGTCATGCATGGTGTTTCGCCGTCTTCGT
FANCG|NM_004629|1905	511	2189	FANCG	NM_004629	1905	TAGAAGACGCACCGGGCCTTTAAGGATCTGTTGTTAGTTAATATTCATAGCTAACAGCAGATCCTTAGAGGCTTTTTTGGCAAGCAAAAGACGGCATACGAGATGTGTGTCATGCATGGTCATTCGCCGTCTTCGT
FANCG|NM_004629|1906	512	2189	FANCG	NM_004629	1906	TAGAAGACGCACCGGTGAGGAATTAGATGCTTCATTGTTAATATTCATAGCAATGGAGCATCTAATTCCTCATTTTTTGGCAAGCAAAAGACGGCATACGAGATACGTGTCATGCATGGTACTTCGCCGTCTTCGT
FANCG|NM_004629|1907	513	2189	FANCG	NM_004629	1907	TAGAAGACGCACCGGTAATTAGTCGTGGATTGGAATGTTAATATTCATAGCATTCCAGTCCACGACTAATTATTTTTTGGCAAGCAAAAGACGGCATACGAGATCAGTGTCATGCATGGTTGTTCGCCGTCTTCGT
FANCG|NM_004629|1908	514	2189	FANCG	NM_004629	1908	TAGAAGACGCACCGGCTGCTGGTTGAGGCTTTGAATGTTAATATTCATAGCATTCAAGGCCTCAACTAGCAGTTTTTTGGCAAGCAAAAGACGGCATACGAGATGTGTGTCATGCATGCAGTTTCGCCGTCTTCGT
FANCG|NM_004629|1909	515	2189	FANCG	NM_004629	1909	TAGAAGACGCACCGGGATGTCCTCTTGACAGTATTTGTTAATATTCATAGCAAATGCTGTCAGGAGGACATCTTTTTTGGCAAGCAAAAGACGGCATACGAGATCAGTGTCATGCATGCACATTCGCCGTCTTCGT
FANCG|NM_004629|1910	516	2189	FANCG	NM_004629	1910	TAGAAGACGCACCGGGTACCTAGAAAGTTATTTGAGGTTAATATTCATAGCCTCAAATAGCTTTCTAGGTACTTTTTTGGCAAGCAAAAGACGGCATACGAGATTGGTGTCATGCATGCAACTTCGCCGTCTTCGT
FANCG|NM_004629|1911	517	2189	FANCG	NM_004629	1911	TAGAAGACGCACCGGCAGGTAATCGAGACATTTACTGTTAATATTCATAGCAGTAAGTGTCTCGATTACCTGTTTTTTGGCAAGCAAAAGACGGCATACGAGATACGTGTCATGCATGCATGTTCGCCGTCTTCGT
FASN|NM_004104|1912	518	2194	FASN	NM_004104	1912	TAGAAGACGCACCGGCCTACTGGATGTGTTCTTTAAGTTAATATTCATAGCTTGAAGAACGCATCCAGTAGGTTTTTTGGCAAGCAAAAGACGGCATACGAGATCAGTGTCATGCATGACGTTTCGCCGTCTTCGT
FASN|NM_004104|1913	519	2194	FASN	NM_004104	1913	TAGAAGACGCACCGGGCTACGACTATGGCCCTTATTGTTAATATTCATAGCAATGAGGGCCGTAGTCGTAGCTTTTTTGGCAAGCAAAAGACGGCATACGAGATACGTGTCATGCATGACCATTCGCCGTCTTCGT
FASN|NM_004104|1914	520	2194	FASN	NM_004104	1914	TAGAAGACGCACCGGCATGGAGTGTATTTGTGAGAAGTTAATATTCATAGCTTCTCACAGATACGCTCCATGTTTTTTGGCAAGCAAAAGACGGCATACGAGATGTGTGTCATGCATGACACTTCGCCGTCTTCGT
FASN|NM_004104|1915	521	2194	FASN	NM_004104	1915	TAGAAGACGCACCGGCGAGAGCATCTTTGATGATATGTTAATATTCATAGCATGTCATCAAAGGTGCTCTCGTTTTTTGGCAAGCAAAAGACGGCATACGAGATTGGTGTCATGCATGACTGTTCGCCGTCTTCGT
FASN|NM_004104|1916	522	2194	FASN	NM_004104	1916	TAGAAGACGCACCGGGCTTCCTGGAAATTGGTAAATGTTAATATTCATAGCATTTGCCAATTTCCAGGAAGCTTTTTTGGCAAGCAAAAGACGGCATACGAGATACGTGTCATGCATGTGGTTTCGCCGTCTTCGT
FASN|NM_004104|1917	523	2194	FASN	NM_004104	1917	TAGAAGACGCACCGGGCAACTATGGCTTTGCTAATTGTTAATATTCATAGCAATTGGCAAAGCCGTAGTTGCTTTTTTGGCAAGCAAAAGACGGCATACGAGATTGGTGTCATGCATGTGCATTCGCCGTCTTCGT
FASN|NM_004104|1918	524	2194	FASN	NM_004104	1918	TAGAAGACGCACCGGGAAGCACATTGGTAAAGTTGTGTTAATATTCATAGCACGACTTTGCCAATGTGCTTCTTTTTTGGCAAGCAAAAGACGGCATACGAGATCAGTGTCATGCATGTGACTTCGCCGTCTTCGT
FASN|NM_004104|1919	525	2194	FASN	NM_004104	1919	TAGAAGACGCACCGGTATGCTTCTTTGTGCAGTAGTGTTAATATTCATAGCACTGCTGCACGAAGAAGCATATTTTTTGGCAAGCAAAAGACGGCATACGAGATGTGTGTCATGCATGTGTGTTCGCCGTCTTCGT
ABCB7|NM_004299|1920	526	22	ABCB7	NM_004299	1920	TAGAAGACGCACCGGGCAGATAATGATGTAGGTAATGTTAATATTCATAGCATTACCTGCATCATTATCTGCTTTTTTGGCAAGCAAAAGACGGCATACGAGATGTGTGTCATGACGTGTGTTTCGCCGTCTTCGT
ABCB7|NM_004299|1921	527	22	ABCB7	NM_004299	1921	TAGAAGACGCACCGGCCTCATAGTATCTATTCAGAAGTTAATATTCATAGCTTCTGAATAGATACTATGAGGTTTTTTGGCAAGCAAAAGACGGCATACGAGATCAGTGTCATGACGTGTCATTCGCCGTCTTCGT
ABCB7|NM_004299|1922	528	22	ABCB7	NM_004299	1922	TAGAAGACGCACCGGGCACAGAGATGTGATGGGTTTGTTAATATTCATAGCAAATCCATCATATCTCTGTGCTTTTTTGGCAAGCAAAAGACGGCATACGAGATTGGTGTCATGACGTGTACTTCGCCGTCTTCGT
ABCB7|NM_004299|1923	529	22	ABCB7	NM_004299	1923	TAGAAGACGCACCGGGCATTTATCTTGCTGGTTAAAGTTAATATTCATAGCTTTGACCAGCAAGATAAATGCTTTTTTGGCAAGCAAAAGACGGCATACGAGATACGTGTCATGACGTGTTGTTCGCCGTCTTCGT
ABCB7|NM_004299|1924	530	22	ABCB7	NM_004299	1924	TAGAAGACGCACCGGGCCATGAAGGGTGTGGTTAAAGTTAATATTCATAGCTTTGACCACATCCTTCATGGCTTTTTTGGCAAGCAAAAGACGGCATACGAGATCAGTGTCATGACGTCAGTTTCGCCGTCTTCGT
ABCB7|NM_004299|1925	531	22	ABCB7	NM_004299	1925	TAGAAGACGCACCGGGATGCTGTCCTCTTCTATAATGTTAATATTCATAGCATTATGGAAGAGGACAGCATCTTTTTTGGCAAGCAAAAGACGGCATACGAGATACGTGTCATGACGTCACATTCGCCGTCTTCGT
ABCB7|NM_004299|1926	532	22	ABCB7	NM_004299	1926	TAGAAGACGCACCGGAGTGGTTGATGTAGATGAAATGTTAATATTCATAGCATTTCATCTGCATCAACCACTTTTTTTGGCAAGCAAAAGACGGCATACGAGATGTGTGTCATGACGTCAACTTCGCCGTCTTCGT
ABCB7|NM_004299|1927	533	22	ABCB7	NM_004299	1927	TAGAAGACGCACCGGCAACCAGATGTTGGGAAATATGTTAATATTCATAGCATGTTTCCCGACATCTGGTTGTTTTTTGGCAAGCAAAAGACGGCATACGAGATTGGTGTCATGACGTCATGTTCGCCGTCTTCGT
FCER2|NM_001207019|1928	534	2208	FCER2	NM_001207019	1928	TAGAAGACGCACCGGGGATCAATTTCCAATGGAAGTGTTAATATTCATAGCACTTCCGTTGGAAATTGATCCTTTTTTGGCAAGCAAAAGACGGCATACGAGATACGTGTCATGACGTACGTTTCGCCGTCTTCGT
FCER2|NM_001207019|1929	535	2208	FCER2	NM_001207019	1929	TAGAAGACGCACCGGGAGAGGAATGAAGCTTTAGATGTTAATATTCATAGCATCTGAAGCTTCGTTCCTCTCTTTTTTGGCAAGCAAAAGACGGCATACGAGATTGGTGTCATGACGTACCATTCGCCGTCTTCGT
FCER2|NM_001207019|1930	536	2208	FCER2	NM_001207019	1930	TAGAAGACGCACCGGCACGCAGATTTCATAGGAATTGTTAATATTCATAGCAGTTCCTGTGAAATCTGCGTGTTTTTTGGCAAGCAAAAGACGGCATACGAGATCAGTGTCATGACGTACACTTCGCCGTCTTCGT
FCER2|NM_001207019|1931	537	2208	FCER2	NM_001207019	1931	TAGAAGACGCACCGGCAGCTTTAAGTCCTAGGAATTGTTAATATTCATAGCAATTCCTGGGACTTGAAGCTGTTTTTTGGCAAGCAAAAGACGGCATACGAGATGTGTGTCATGACGTACTGTTCGCCGTCTTCGT
FCER2|NM_001207019|1932	538	2208	FCER2	NM_001207019	1932	TAGAAGACGCACCGGGCTGAACAGTAGAGATTGAAAGTTAATATTCATAGCTTTCAATCTCTGCTGTTCAGCTTTTTTGGCAAGCAAAAGACGGCATACGAGATTGGTGTCATGACGTTGGTTTCGCCGTCTTCGT
FCER2|NM_001207019|1933	539	2208	FCER2	NM_001207019	1933	TAGAAGACGCACCGGAGAGGAACGAAGCTTTAGATTGTTAATATTCATAGCAATCTGAAGCTTCGTTCCTCTTTTTTTGGCAAGCAAAAGACGGCATACGAGATGTGTGTCATGACGTTGCATTCGCCGTCTTCGT
FCER2|NM_001207019|1934	540	2208	FCER2	NM_001207019	1934	TAGAAGACGCACCGGGCTTCAGATTTGTTGGAAAGAGTTAATATTCATAGCTCTTTCCAGCAAATCTGAAGCTTTTTTGGCAAGCAAAAGACGGCATACGAGATACGTGTCATGACGTTGACTTCGCCGTCTTCGT
FCER2|NM_001207019|1935	541	2208	FCER2	NM_001207019	1935	TAGAAGACGCACCGGAAATCCTAGTCCACGTAGATTGTTAATATTCATAGCAATCTGCGTGGACTGGGATTTTTTTTTGGCAAGCAAAAGACGGCATACGAGATCAGTGTCATGACGTTGTGTTCGCCGTCTTCGT
ALKBH3|NM_139178|1936	542	221120	ALKBH3	NM_139178	1936	TAGAAGACGCACCGGCGCACATTAAAGAACCGTATTGTTAATATTCATAGCAATGCGGTTCTTTAGTGTGCGTTTTTTGGCAAGCAAAAGACGGCATACGAGATTGGTGTCATGACCAGTGTTTCGCCGTCTTCGT
ALKBH3|NM_139178|1937	543	221120	ALKBH3	NM_139178	1937	TAGAAGACGCACCGGCCGGTATTAGAGAGGATATAAGTTAATATTCATAGCTTATATCCTCTCTGATGCCGGTTTTTTGGCAAGCAAAAGACGGCATACGAGATGTGTGTCATGACCAGTCATTCGCCGTCTTCGT
ALKBH3|NM_139178|1938	544	221120	ALKBH3	NM_139178	1938	TAGAAGACGCACCGGCTCTGCAATCTTTATCGTAATGTTAATATTCATAGCATTGCGATAAAGATTGCAGAGTTTTTTGGCAAGCAAAAGACGGCATACGAGATACGTGTCATGACCAGTACTTCGCCGTCTTCGT
ALKBH3|NM_139178|1939	545	221120	ALKBH3	NM_139178	1939	TAGAAGACGCACCGGGTATCTAGGGTTTGTTTGTATGTTAATATTCATAGCATACAAACAGACCCTAGATACTTTTTTGGCAAGCAAAAGACGGCATACGAGATCAGTGTCATGACCAGTTGTTCGCCGTCTTCGT
ALKBH3|NM_139178|1940	546	221120	ALKBH3	NM_139178	1940	TAGAAGACGCACCGGCAGAGAGGGTGTGTGTGAGATGTTAATATTCATAGCATTTCATACACACCCTCTCTGTTTTTTGGCAAGCAAAAGACGGCATACGAGATGTGTGTCATGACCACAGTTTCGCCGTCTTCGT
ALKBH3|NM_139178|1941	547	221120	ALKBH3	NM_139178	1941	TAGAAGACGCACCGGGGATCATGGGACTTTGTTAATGTTAATATTCATAGCATTAACAAGGTCCCATGATCCTTTTTTGGCAAGCAAAAGACGGCATACGAGATCAGTGTCATGACCACACATTCGCCGTCTTCGT
ALKBH3|NM_139178|1942	548	221120	ALKBH3	NM_139178	1942	TAGAAGACGCACCGGAGCATTGAGTGCCTAAAGAATGTTAATATTCATAGCATTCTTTGGGCACTCGATGCTTTTTTTGGCAAGCAAAAGACGGCATACGAGATTGGTGTCATGACCACAACTTCGCCGTCTTCGT
ALKBH3|NM_139178|1943	549	221120	ALKBH3	NM_139178	1943	TAGAAGACGCACCGGACAGAGAGTTTGTGTTTAAAGGTTAATATTCATAGCCTTTGAACACAAACTCTCTGTTTTTTTGGCAAGCAAAAGACGGCATACGAGATACGTGTCATGACCACATGTTCGCCGTCTTCGT
FCGR2A|NM_001136219|1944	550	2212	FCGR2A	NM_001136219	1944	TAGAAGACGCACCGGGCACCTACTGATGATGATAAAGTTAATATTCATAGCTTTATCATCGTCAGTAGGTGCTTTTTTGGCAAGCAAAAGACGGCATACGAGATCAGTGTCATGACCAACGTTTCGCCGTCTTCGT
FCGR2A|NM_001136219|1945	551	2212	FCGR2A	NM_001136219	1945	TAGAAGACGCACCGGGAAGAAACCAACAATGACTATGTTAATATTCATAGCATAGTCATTGTTGGTTTCTTCTTTTTTGGCAAGCAAAAGACGGCATACGAGATACGTGTCATGACCAACCATTCGCCGTCTTCGT
FCGR2A|NM_001136219|1946	552	2212	FCGR2A	NM_001136219	1946	TAGAAGACGCACCGGTCCATTCAGTGGTTCCATAATGTTAATATTCATAGCATTGTGGAACCACTGAATGGATTTTTTGGCAAGCAAAAGACGGCATACGAGATGTGTGTCATGACCAACACTTCGCCGTCTTCGT
FCGR2A|NM_001136219|1947	553	2212	FCGR2A	NM_001136219	1947	TAGAAGACGCACCGGAAGGTCACATTCTTCTAGAATGTTAATATTCATAGCATTCTGGAAGAATGTGACCTTTTTTTTGGCAAGCAAAAGACGGCATACGAGATTGGTGTCATGACCAACTGTTCGCCGTCTTCGT
FCGR2A|NM_001136219|1948	554	2212	FCGR2A	NM_001136219	1948	TAGAAGACGCACCGGAGGTTCAAGGCCAACAATAATGTTAATATTCATAGCATTGTTGTTGGCCTTGAACCTTTTTTTGGCAAGCAAAAGACGGCATACGAGATACGTGTCATGACCATGGTTTCGCCGTCTTCGT
FCGR2A|NM_001136219|1949	555	2212	FCGR2A	NM_001136219	1949	TAGAAGACGCACCGGAACGACCATGTCAATAGTAATGTTAATATTCATAGCATTACTGTTGACATGGTCGTTTTTTTTGGCAAGCAAAAGACGGCATACGAGATTGGTGTCATGACCATGCATTCGCCGTCTTCGT
FCGR2A|NM_001136219|1950	556	2212	FCGR2A	NM_001136219	1950	TAGAAGACGCACCGGAGGACTCTGTGATTCTGATATGTTAATATTCATAGCATGTCAGAGTCACAGAGTCCTTTTTTTGGCAAGCAAAAGACGGCATACGAGATCAGTGTCATGACCATGACTTCGCCGTCTTCGT
FCGR2A|NM_001136219|1951	557	2212	FCGR2A	NM_001136219	1951	TAGAAGACGCACCGGCAAGCAAACCATAGTCATAGTGTTAATATTCATAGCACTGTGACTGTGGTTTGCTTGTTTTTTGGCAAGCAAAAGACGGCATACGAGATGTGTGTCATGACCATGTGTTCGCCGTCTTCGT
FOXK1|NM_001037165|1952	558	221937	FOXK1	NM_001037165	1952	TAGAAGACGCACCGGGTCGCTCTATCATAAAGAAGAGTTAATATTCATAGCTCTTCTTTGTGATAGAGCGACTTTTTTGGCAAGCAAAAGACGGCATACGAGATACGTGTCATGACACGTGTTTCGCCGTCTTCGT
FOXK1|NM_001037165|1953	559	221937	FOXK1	NM_001037165	1953	TAGAAGACGCACCGGGAGAAACCCATCATTGTGTTTGTTAATATTCATAGCAAACGCAATGGTGGGTTTCTCTTTTTTGGCAAGCAAAAGACGGCATACGAGATTGGTGTCATGACACGTCATTCGCCGTCTTCGT
FOXK1|NM_001037165|1954	560	221937	FOXK1	NM_001037165	1954	TAGAAGACGCACCGGCAAGTTAGTTTCTGTCCTAGAGTTAATATTCATAGCTCTGGGACAGAAGCTAACTTGTTTTTTGGCAAGCAAAAGACGGCATACGAGATCAGTGTCATGACACGTACTTCGCCGTCTTCGT
FOXK1|NM_001037165|1955	561	221937	FOXK1	NM_001037165	1955	TAGAAGACGCACCGGCCATCAAGATCTAGTTCATGTGTTAATATTCATAGCACGTGAACTGGATCTTGATGGTTTTTTGGCAAGCAAAAGACGGCATACGAGATGTGTGTCATGACACGTTGTTCGCCGTCTTCGT
FOXK1|NM_001037165|1956	562	221937	FOXK1	NM_001037165	1956	TAGAAGACGCACCGGAGAGTACTGGTATTCCTAAAGGTTAATATTCATAGCCTTTGGGAATACCGGTACTCTTTTTTTGGCAAGCAAAAGACGGCATACGAGATTGGTGTCATGACACCAGTTTCGCCGTCTTCGT
FOXK1|NM_001037165|1957	563	221937	FOXK1	NM_001037165	1957	TAGAAGACGCACCGGTCACGTCGCTTTATCATAAAGGTTAATATTCATAGCCTTTGTGATAGAGCGACGTGATTTTTTGGCAAGCAAAAGACGGCATACGAGATGTGTGTCATGACACCACATTCGCCGTCTTCGT
FOXK1|NM_001037165|1958	564	221937	FOXK1	NM_001037165	1958	TAGAAGACGCACCGGTTAGCTTCTGTCCTAGAGTATGTTAATATTCATAGCGTACTCTGGGACAGAAGCTAATTTTTTGGCAAGCAAAAGACGGCATACGAGATACGTGTCATGACACCAACTTCGCCGTCTTCGT
FOXK1|NM_001037165|1959	565	221937	FOXK1	NM_001037165	1959	TAGAAGACGCACCGGACCTCTCTTTGAACTGTTACTGTTAATATTCATAGCAGTAACGGTTCAAAGAGAGGTTTTTTTGGCAAGCAAAAGACGGCATACGAGATCAGTGTCATGACACCATGTTCGCCGTCTTCGT
FDFT1|NM_004462|1960	566	2222	FDFT1	NM_004462	1960	TAGAAGACGCACCGGCGCAACGTAGTGTGTATATTTGTTAATATTCATAGCAAATATGCACACTGCGTTGCGTTTTTTGGCAAGCAAAAGACGGCATACGAGATGTGTGTCATGACACACGTTTCGCCGTCTTCGT
FDFT1|NM_004462|1961	567	2222	FDFT1	NM_004462	1961	TAGAAGACGCACCGGCCTATCTTTCGAGACTTAGAAGTTAATATTCATAGCTTCTGAGTCTCGAAAGGTAGGTTTTTTGGCAAGCAAAAGACGGCATACGAGATCAGTGTCATGACACACCATTCGCCGTCTTCGT
FDFT1|NM_004462|1962	568	2222	FDFT1	NM_004462	1962	TAGAAGACGCACCGGACAAACATCATCCGTGATTATGTTAATATTCATAGCATAGTCACGGATGATGTTTGTTTTTTTGGCAAGCAAAAGACGGCATACGAGATTGGTGTCATGACACACACTTCGCCGTCTTCGT
FDFT1|NM_004462|1963	569	2222	FDFT1	NM_004462	1963	TAGAAGACGCACCGGACTTGCTACAAGTATCTCAATGTTAATATTCATAGCATTGAGATACTTGTAGCAAGTTTTTTTGGCAAGCAAAAGACGGCATACGAGATACGTGTCATGACACACTGTTCGCCGTCTTCGT
FDFT1|NM_004462|1964	570	2222	FDFT1	NM_004462	1964	TAGAAGACGCACCGGACCTGTCGTTTGTTATGCTTTGTTAATATTCATAGCAAAGCATGACAAACGACAGGTTTTTTTGGCAAGCAAAAGACGGCATACGAGATCAGTGTCATGACACTGGTTTCGCCGTCTTCGT
FDFT1|NM_004462|1965	571	2222	FDFT1	NM_004462	1965	TAGAAGACGCACCGGAGCTGTCAAAGCCATTATATAGTTAATATTCATAGCTATATGATGGCTTTGACAGCTTTTTTTGGCAAGCAAAAGACGGCATACGAGATACGTGTCATGACACTGCATTCGCCGTCTTCGT
FDFT1|NM_004462|1966	572	2222	FDFT1	NM_004462	1966	TAGAAGACGCACCGGGGACACATTGGAAGATGATATGTTAATATTCATAGCATGTCATCTTCCAGTGTGTCCTTTTTTGGCAAGCAAAAGACGGCATACGAGATGTGTGTCATGACACTGACTTCGCCGTCTTCGT
FDFT1|NM_004462|1967	573	2222	FDFT1	NM_004462	1967	TAGAAGACGCACCGGGCAGTGCCTGAATGAATTTATGTTAATATTCATAGCATAAGTTCATTCAGGCACTGCTTTTTTGGCAAGCAAAAGACGGCATACGAGATTGGTGTCATGACACTGTGTTCGCCGTCTTCGT
LRWD1|NM_152892|1968	574	222229	LRWD1	NM_152892	1968	TAGAAGACGCACCGGGCATTTGTGAATGAGGATATCGTTAATATTCATAGCGATGTCCTCATTCACAAATGCTTTTTTGGCAAGCAAAAGACGGCATACGAGATCAGTGTCATGACTGGTGTTTCGCCGTCTTCGT
LRWD1|NM_152892|1969	575	222229	LRWD1	NM_152892	1969	TAGAAGACGCACCGGGATGGGTTGGTATTTGTGAATGTTAATATTCATAGCATTCACAAATGCCAGCCCATCTTTTTTGGCAAGCAAAAGACGGCATACGAGATACGTGTCATGACTGGTCATTCGCCGTCTTCGT
LRWD1|NM_152892|1970	576	222229	LRWD1	NM_152892	1970	TAGAAGACGCACCGGGACGGTTAATGACAACTTGAAGTTAATATTCATAGCTTCAGGTTGTCATTGACCGTCTTTTTTGGCAAGCAAAAGACGGCATACGAGATGTGTGTCATGACTGGTACTTCGCCGTCTTCGT
LRWD1|NM_152892|1971	577	222229	LRWD1	NM_152892	1971	TAGAAGACGCACCGGGCTGGTATTTGTGAATGAGGGGTTAATATTCATAGCTCCTCATTCACAAATGCCAGCTTTTTTGGCAAGCAAAAGACGGCATACGAGATTGGTGTCATGACTGGTTGTTCGCCGTCTTCGT
LRWD1|NM_152892|1972	578	222229	LRWD1	NM_152892	1972	TAGAAGACGCACCGGGAGGTTGTGTGTGTAATTGATGTTAATATTCATAGCATCAATTACGCACACAGCCTCTTTTTTGGCAAGCAAAAGACGGCATACGAGATACGTGTCATGACTGCAGTTTCGCCGTCTTCGT
LRWD1|NM_152892|1973	579	222229	LRWD1	NM_152892	1973	TAGAAGACGCACCGGGGTCAATGACAACTTGAAAGTGTTAATATTCATAGCACTTTCAGGTTGTCATTGACCTTTTTTGGCAAGCAAAAGACGGCATACGAGATTGGTGTCATGACTGCACATTCGCCGTCTTCGT
LRWD1|NM_152892|1974	580	222229	LRWD1	NM_152892	1974	TAGAAGACGCACCGGGAGGGTGTGTGAGGTGGAGTTGTTAATATTCATAGCAATTCCACTTCACACACCCTCTTTTTTGGCAAGCAAAAGACGGCATACGAGATCAGTGTCATGACTGCAACTTCGCCGTCTTCGT
LRWD1|NM_152892|1975	581	222229	LRWD1	NM_152892	1975	TAGAAGACGCACCGGATCGTGCTCCATAAGTATAAGGTTAATATTCATAGCCTTGTACTTGTGGAGCACGATTTTTTTGGCAAGCAAAAGACGGCATACGAGATGTGTGTCATGACTGCATGTTCGCCGTCTTCGT
FECH|NM_000140|1976	582	2235	FECH	NM_000140	1976	TAGAAGACGCACCGGCCAAGGGGTGTGGAGTTGGAAGTTAATATTCATAGCTTTCAACTCCACACTCCTTGGTTTTTTGGCAAGCAAAAGACGGCATACGAGATTGGTGTCATGACTGACGTTTCGCCGTCTTCGT
FECH|NM_000140|1977	583	2235	FECH	NM_000140	1977	TAGAAGACGCACCGGGCTATTGCTTTCACATAGTATGTTAATATTCATAGCATACTGTGTGAAAGCAATAGCTTTTTTGGCAAGCAAAAGACGGCATACGAGATGTGTGTCATGACTGACCATTCGCCGTCTTCGT
FECH|NM_000140|1978	584	2235	FECH	NM_000140	1978	TAGAAGACGCACCGGGACCATATTGAAACGTTGTATGTTAATATTCATAGCATACAGCGTTTCAATATGGTCTTTTTTGGCAAGCAAAAGACGGCATACGAGATACGTGTCATGACTGACACTTCGCCGTCTTCGT
FECH|NM_000140|1979	585	2235	FECH	NM_000140	1979	TAGAAGACGCACCGGCAGGGAGACTAAATCTTTCTTGTTAATATTCATAGCAAGAAGGATTTAGTCTCCCTGTTTTTTGGCAAGCAAAAGACGGCATACGAGATCAGTGTCATGACTGACTGTTCGCCGTCTTCGT
FECH|NM_000140|1980	586	2235	FECH	NM_000140	1980	TAGAAGACGCACCGGGCTGAGTTTCTTAATGGAAATGTTAATATTCATAGCATTTCCATTAAGAGACTCAGCTTTTTTGGCAAGCAAAAGACGGCATACGAGATGTGTGTCATGACTGTGGTTTCGCCGTCTTCGT
FECH|NM_000140|1981	587	2235	FECH	NM_000140	1981	TAGAAGACGCACCGGGGTGAAGTTGTTGGATGAATTGTTAATATTCATAGCAATTCATCCAGCAGCTTCACCTTTTTTGGCAAGCAAAAGACGGCATACGAGATCAGTGTCATGACTGTGCATTCGCCGTCTTCGT
FECH|NM_000140|1982	588	2235	FECH	NM_000140	1982	TAGAAGACGCACCGGCTGTCTGTAGGGAGATTAAATGTTAATATTCATAGCATTTAGTCTCCCTGCAGACAGTTTTTTGGCAAGCAAAAGACGGCATACGAGATTGGTGTCATGACTGTGACTTCGCCGTCTTCGT
FECH|NM_000140|1983	589	2235	FECH	NM_000140	1983	TAGAAGACGCACCGGTGGGTCCTTAAACAGATGAATGTTAATATTCATAGCATTCGTCTGTTTGAGGACCCATTTTTTGGCAAGCAAAAGACGGCATACGAGATACGTGTCATGACTGTGTGTTCGCCGTCTTCGT
FES|NM_001143783|1984	590	2242	FES	NM_001143783	1984	TAGAAGACGCACCGGCTTGGATAACTTGTACCGATTGTTAATATTCATAGCAGTCGGTACAGGTTATCCAAGTTTTTTGGCAAGCAAAAGACGGCATACGAGATCAGTGTCATGTGGTGTGTTTCGCCGTCTTCGT
FES|NM_001143783|1985	591	2242	FES	NM_001143783	1985	TAGAAGACGCACCGGGAGAAGAATGTCCTGAAGATTGTTAATATTCATAGCGATCTTCAGGACATTCTTCTCTTTTTTGGCAAGCAAAAGACGGCATACGAGATACGTGTCATGTGGTGTCATTCGCCGTCTTCGT
FES|NM_001143783|1986	592	2242	FES	NM_001143783	1986	TAGAAGACGCACCGGCAAGGCTAAGGATAAGTATGTGTTAATATTCATAGCACATACTTGTCCTTGGCCTTGTTTTTTGGCAAGCAAAAGACGGCATACGAGATGTGTGTCATGTGGTGTACTTCGCCGTCTTCGT
FES|NM_001143783|1987	593	2242	FES	NM_001143783	1987	TAGAAGACGCACCGGCAACAGGAGTTCTGGAATGAAGTTAATATTCATAGCTTCATTCCGGAGCTCCTGTTGTTTTTTGGCAAGCAAAAGACGGCATACGAGATTGGTGTCATGTGGTGTTGTTCGCCGTCTTCGT
FES|NM_001143783|1988	594	2242	FES	NM_001143783	1988	TAGAAGACGCACCGGCTACTGGAGGGTATGAGAAGGGTTAATATTCATAGCCTTTCTCATGCCCTCCAGTAGTTTTTTGGCAAGCAAAAGACGGCATACGAGATACGTGTCATGTGGTCAGTTTCGCCGTCTTCGT
FES|NM_001143783|1989	595	2242	FES	NM_001143783	1989	TAGAAGACGCACCGGACCCACGTTGGAGATCTTTAAGTTAATATTCATAGCTTAAGGATCTCCAGCGTGGGTTTTTTTGGCAAGCAAAAGACGGCATACGAGATTGGTGTCATGTGGTCACATTCGCCGTCTTCGT
FES|NM_001143783|1990	596	2242	FES	NM_001143783	1990	TAGAAGACGCACCGGCTGACCTTAAGGCTAAGTTTCGTTAATATTCATAGCGAAACTTGGCCTTGAGGTCAGTTTTTTGGCAAGCAAAAGACGGCATACGAGATCAGTGTCATGTGGTCAACTTCGCCGTCTTCGT
FES|NM_001143783|1991	597	2242	FES	NM_001143783	1991	TAGAAGACGCACCGGGAAGCTCTTTGTTCACCATAAGTTAATATTCATAGCTTGTGGTGAGCAAAGAGCTTCTTTTTTGGCAAGCAAAAGACGGCATACGAGATGTGTGTCATGTGGTCATGTTCGCCGTCTTCGT
FGA|NM_000508|1992	598	2243	FGA	NM_000508	1992	TAGAAGACGCACCGGCCTCAGCTAATAACTGTGATAGTTAATATTCATAGCTATCACGGTTATTGGCTGAGGTTTTTTGGCAAGCAAAAGACGGCATACGAGATTGGTGTCATGTGGTACGTTTCGCCGTCTTCGT
FGA|NM_000508|1993	599	2243	FGA	NM_000508	1993	TAGAAGACGCACCGGGCTCAGTTGGTTGGTATGGAAGTTAATATTCATAGCTTTCATATCAACCAACTGAGCTTTTTTGGCAAGCAAAAGACGGCATACGAGATGTGTGTCATGTGGTACCATTCGCCGTCTTCGT
FGA|NM_000508|1994	600	2243	FGA	NM_000508	1994	TAGAAGACGCACCGGTCATTCGTTGACCACTAATATGTTAATATTCATAGCATATTAGTGGTCAACGAATGATTTTTTGGCAAGCAAAAGACGGCATACGAGATACGTGTCATGTGGTACACTTCGCCGTCTTCGT
FGA|NM_000508|1995	601	2243	FGA	NM_000508	1995	TAGAAGACGCACCGGACGCGTCGTTTATGCTTTAAAGTTAATATTCATAGCTTTAGAGCATGAACGACGCGTTTTTTTGGCAAGCAAAAGACGGCATACGAGATCAGTGTCATGTGGTACTGTTCGCCGTCTTCGT
FGA|NM_000508|1996	602	2243	FGA	NM_000508	1996	TAGAAGACGCACCGGGAATCTGGCATCTTCATAAATGTTAATATTCATAGCATTTGTGAAGATGCCAGATTCTTTTTTGGCAAGCAAAAGACGGCATACGAGATGTGTGTCATGTGGTTGGTTTCGCCGTCTTCGT
FGA|NM_000508|1997	603	2243	FGA	NM_000508	1997	TAGAAGACGCACCGGGCCGATTATGAAGGAACATATGTTAATATTCATAGCATGTGTTCCTTCATGATCGGCTTTTTTGGCAAGCAAAAGACGGCATACGAGATCAGTGTCATGTGGTTGCATTCGCCGTCTTCGT
FGA|NM_000508|1998	604	2243	FGA	NM_000508	1998	TAGAAGACGCACCGGACAATAGAGGAGACTCCATATGTTAATATTCATAGCATGTGGAGTCTCCTCTGTTGTTTTTTTGGCAAGCAAAAGACGGCATACGAGATTGGTGTCATGTGGTTGACTTCGCCGTCTTCGT
FGA|NM_000508|1999	605	2243	FGA	NM_000508	1999	TAGAAGACGCACCGGGGGTTGATTGATGAAGTTAATGTTAATATTCATAGCATTGACTTCATCAATCAACCCTTTTTTGGCAAGCAAAAGACGGCATACGAGATACGTGTCATGTGGTTGTGTTCGCCGTCTTCGT
FGB|NM_001184741|2000	606	2244	FGB	NM_001184741	2000	TAGAAGACGCACCGGGCACAGATGGTGGTGTAGTGTGTTAATATTCATAGCATACTACACCATCATCTGTGCTTTTTTGGCAAGCAAAAGACGGCATACGAGATGTGTGTCATGTGCAGTGTTTCGCCGTCTTCGT
FGB|NM_001184741|2001	607	2244	FGB	NM_001184741	2001	TAGAAGACGCACCGGGGTGAATATTGGTTTGGAAATGTTAATATTCATAGCATTTCCAAGCCAATATTCACCTTTTTTGGCAAGCAAAAGACGGCATACGAGATCAGTGTCATGTGCAGTCATTCGCCGTCTTCGT
FGB|NM_001184741|2002	608	2244	FGB	NM_001184741	2002	TAGAAGACGCACCGGGGTGGTGGGTGGTGGTATGATGTTAATATTCATAGCATTATACCACCATCCACCACCTTTTTTGGCAAGCAAAAGACGGCATACGAGATTGGTGTCATGTGCAGTACTTCGCCGTCTTCGT
FGB|NM_001184741|2003	609	2244	FGB	NM_001184741	2003	TAGAAGACGCACCGGGTGTTGACTTTGGTAGGAAATGTTAATATTCATAGCATTTCCTGCCAAAGTCAACACTTTTTTGGCAAGCAAAAGACGGCATACGAGATACGTGTCATGTGCAGTTGTTCGCCGTCTTCGT
FGB|NM_001184741|2004	610	2244	FGB	NM_001184741	2004	TAGAAGACGCACCGGAGCACGTATGACAGAGATAATGTTAATATTCATAGCATTGTCTCTGTCATACGTGCTTTTTTTGGCAAGCAAAAGACGGCATACGAGATCAGTGTCATGTGCACAGTTTCGCCGTCTTCGT
FGB|NM_001184741|2005	611	2244	FGB	NM_001184741	2005	TAGAAGACGCACCGGGAGGAAGATGAGTGTGAAGGTGTTAATATTCATAGCATCTTCATACTCATCTTCCTCTTTTTTGGCAAGCAAAAGACGGCATACGAGATACGTGTCATGTGCACACATTCGCCGTCTTCGT
FGB|NM_001184741|2006	612	2244	FGB	NM_001184741	2006	TAGAAGACGCACCGGGATGAGACTGTGAATAGTAATGTTAATATTCATAGCATTGCTATTCACAGTCTCATCTTTTTTGGCAAGCAAAAGACGGCATACGAGATGTGTGTCATGTGCACAACTTCGCCGTCTTCGT
FGB|NM_001184741|2007	613	2244	FGB	NM_001184741	2007	TAGAAGACGCACCGGGGATGGATAGTGATTCAGAATGTTAATATTCATAGCGTTCTGAATCACTGTCCATCCTTTTTTGGCAAGCAAAAGACGGCATACGAGATTGGTGTCATGTGCACATGTTCGCCGTCTTCGT
FGF1|NM_000800|2008	614	2246	FGF1	NM_000800	2008	TAGAAGACGCACCGGGCCCTGACTGAGAAGTTTAGTGTTAATATTCATAGCATTAAACTTCTCGGTCAGGGCTTTTTTGGCAAGCAAAAGACGGCATACGAGATACGTGTCATGTGCAACGTTTCGCCGTCTTCGT
FGF1|NM_000800|2009	615	2246	FGF1	NM_000800	2009	TAGAAGACGCACCGGAGCGACCAGCATAACACTAAAGTTAATATTCATAGCTTTGGTGTTGTGCTGGTCGCTTTTTTTGGCAAGCAAAAGACGGCATACGAGATTGGTGTCATGTGCAACCATTCGCCGTCTTCGT
FGF1|NM_000800|2010	616	2246	FGF1	NM_000800	2010	TAGAAGACGCACCGGTTTGTTGGCCTTAAGAAGAATGTTAATATTCATAGCATTCTTCTTGAGGCCAACAAATTTTTTGGCAAGCAAAAGACGGCATACGAGATCAGTGTCATGTGCAACACTTCGCCGTCTTCGT
FGF1|NM_000800|2011	617	2246	FGF1	NM_000800	2011	TAGAAGACGCACCGGGGAATGTTTGTTCTTGGAAAGGTTAATATTCATAGCCTTTCCAGGAACAAACATTCCTTTTTTGGCAAGCAAAAGACGGCATACGAGATGTGTGTCATGTGCAACTGTTCGCCGTCTTCGT
FGF1|NM_000800|2012	618	2246	FGF1	NM_000800	2012	TAGAAGACGCACCGGTACGGCTCATAGACACTAAATGTTAATATTCATAGCATTTGGTGTCTGTGAGCCGTATTTTTTGGCAAGCAAAAGACGGCATACGAGATTGGTGTCATGTGCATGGTTTCGCCGTCTTCGT
FGF1|NM_000800|2013	619	2246	FGF1	NM_000800	2013	TAGAAGACGCACCGGACCAGCACATAGACACTAAATGTTAATATTCATAGCATTTGGTGTCTGTGTGCTGGTTTTTTTGGCAAGCAAAAGACGGCATACGAGATGTGTGTCATGTGCATGCATTCGCCGTCTTCGT
FGF1|NM_000800|2014	620	2246	FGF1	NM_000800	2014	TAGAAGACGCACCGGCAAACTCCTCTACTGTAGTAAGTTAATATTCATAGCTTGCTACAGTAGAGGAGTTTGTTTTTTGGCAAGCAAAAGACGGCATACGAGATACGTGTCATGTGCATGACTTCGCCGTCTTCGT
FGF1|NM_000800|2015	621	2246	FGF1	NM_000800	2015	TAGAAGACGCACCGGGAGAAGTTTAATCTGCTTCCAGTTAATATTCATAGCTGGAGGCAGATTAAACTTCTCTTTTTTGGCAAGCAAAAGACGGCATACGAGATCAGTGTCATGTGCATGTGTTCGCCGTCTTCGT
FGF2|NM_002006|2016	622	2247	FGF2	NM_002006	2016	TAGAAGACGCACCGGGACCCTCACATTAAGCTATAAGTTAATATTCATAGCTTGTAGCTTGATGTGAGGGTCTTTTTTGGCAAGCAAAAGACGGCATACGAGATTGGTGTCATGTGACGTGTTTCGCCGTCTTCGT
FGF2|NM_002006|2017	623	2247	FGF2	NM_002006	2017	TAGAAGACGCACCGGGTTATGGATGAGTGTTTCTTTGTTAATATTCATAGCAAAGAAACACTCATCCGTAACTTTTTTGGCAAGCAAAAGACGGCATACGAGATGTGTGTCATGTGACGTCATTCGCCGTCTTCGT
FGF2|NM_002006|2018	624	2247	FGF2	NM_002006	2018	TAGAAGACGCACCGGGAAGATTACTGGCTTCTAAATGTTAATATTCATAGCATTTAGAAGCCAGTAATCTTCTTTTTTGGCAAGCAAAAGACGGCATACGAGATACGTGTCATGTGACGTACTTCGCCGTCTTCGT
FGF2|NM_002006|2019	625	2247	FGF2	NM_002006	2019	TAGAAGACGCACCGGGAAACGAACTGGGTAGTATAAGTTAATATTCATAGCTTATACTGCCCAGTTCGTTTCTTTTTTGGCAAGCAAAAGACGGCATACGAGATCAGTGTCATGTGACGTTGTTCGCCGTCTTCGT
FGF2|NM_002006|2020	626	2247	FGF2	NM_002006	2020	TAGAAGACGCACCGGTGAACGATTGGAATCTAATAAGTTAATATTCATAGCTTATTAGATTCCAATCGTTCATTTTTTGGCAAGCAAAAGACGGCATACGAGATGTGTGTCATGTGACCAGTTTCGCCGTCTTCGT
FGF2|NM_002006|2021	627	2247	FGF2	NM_002006	2021	TAGAAGACGCACCGGGTTGGTATGTGGCATTGAAATGTTAATATTCATAGCGTTTCAGTGCCACATACCAACTTTTTTGGCAAGCAAAAGACGGCATACGAGATCAGTGTCATGTGACCACATTCGCCGTCTTCGT
FGF2|NM_002006|2022	628	2247	FGF2	NM_002006	2022	TAGAAGACGCACCGGGAGGAGTTGTGTCTATTAAAGGTTAATATTCATAGCCTTTGATAGACACAACTCCTCTTTTTTGGCAAGCAAAAGACGGCATACGAGATTGGTGTCATGTGACCAACTTCGCCGTCTTCGT
FGF2|NM_002006|2023	629	2247	FGF2	NM_002006	2023	TAGAAGACGCACCGGCCCTCACATCAAGTTACAATTGTTAATATTCATAGCAGTTGTAGCTTGATGTGAGGGTTTTTTGGCAAGCAAAAGACGGCATACGAGATACGTGTCATGTGACCATGTTCGCCGTCTTCGT
FGF5|NM_004464|2024	630	2250	FGF5	NM_004464	2024	TAGAAGACGCACCGGGCCATTGATAGGAACCTTATAGTTAATATTCATAGCTATAGGGTTCCTATCAGTGGCTTTTTTGGCAAGCAAAAGACGGCATACGAGATCAGTGTCATGTGACACGTTTCGCCGTCTTCGT
FGF5|NM_004464|2025	631	2250	FGF5	NM_004464	2025	TAGAAGACGCACCGGAGTTTCGCTTTGGATAATATTGTTAATATTCATAGCAATATTATCCAAAGCGAAACTTTTTTTGGCAAGCAAAAGACGGCATACGAGATACGTGTCATGTGACACCATTCGCCGTCTTCGT
FGF5|NM_004464|2026	632	2250	FGF5	NM_004464	2026	TAGAAGACGCACCGGTACCCGGATGGTAAAGTTAATGTTAATATTCATAGCATTGACTTTGCCATCCGGGTATTTTTTGGCAAGCAAAAGACGGCATACGAGATGTGTGTCATGTGACACACTTCGCCGTCTTCGT
FGF5|NM_004464|2027	633	2250	FGF5	NM_004464	2027	TAGAAGACGCACCGGGTGGTATGTGGCCTTGAATAGGTTAATATTCATAGCTTATTCAGGGCCACATACCACTTTTTTGGCAAGCAAAAGACGGCATACGAGATTGGTGTCATGTGACACTGTTCGCCGTCTTCGT
FGF5|NM_004464|2028	634	2250	FGF5	NM_004464	2028	TAGAAGACGCACCGGGAACTTTCTTTCACGGTTATTGTTAATATTCATAGCAGTAACCGTGAAAGAAAGTTCTTTTTTGGCAAGCAAAAGACGGCATACGAGATACGTGTCATGTGACTGGTTTCGCCGTCTTCGT
FGF5|NM_004464|2029	635	2250	FGF5	NM_004464	2029	TAGAAGACGCACCGGCCAGCATATCTCTACCTATTTGTTAATATTCATAGCAAATGGGTAGAGATATGCTGGTTTTTTGGCAAGCAAAAGACGGCATACGAGATTGGTGTCATGTGACTGCATTCGCCGTCTTCGT
FGF5|NM_004464|2030	636	2250	FGF5	NM_004464	2030	TAGAAGACGCACCGGAATGGATCCCATGAAGCTAATGTTAATATTCATAGCATTGGCTTCGTGGGATCCATTTTTTTTGGCAAGCAAAAGACGGCATACGAGATCAGTGTCATGTGACTGACTTCGCCGTCTTCGT
FGF5|NM_004464|2031	637	2250	FGF5	NM_004464	2031	TAGAAGACGCACCGGAGTTCACAGATGACTGTAAGTGTTAATATTCATAGCACTTGCAGTCATCTGTGAACTTTTTTTGGCAAGCAAAAGACGGCATACGAGATGTGTGTCATGTGACTGTGTTCGCCGTCTTCGT
FGF6|NM_020996|2032	638	2251	FGF6	NM_020996	2032	TAGAAGACGCACCGGCGAGGTGTGGTGAGTTTCTTTGTTAATATTCATAGCAAAGAGACTCACCACGCCTCGTTTTTTGGCAAGCAAAAGACGGCATACGAGATACGTGTCATGTGTGGTGTTTCGCCGTCTTCGT
FGF6|NM_020996|2033	639	2251	FGF6	NM_020996	2033	TAGAAGACGCACCGGGCTGGAAATTTCCATTGTGGGGTTAATATTCATAGCTCCACAGTGGAAATTTCCAGCTTTTTTGGCAAGCAAAAGACGGCATACGAGATTGGTGTCATGTGTGGTCATTCGCCGTCTTCGT
FGF6|NM_020996|2034	640	2251	FGF6	NM_020996	2034	TAGAAGACGCACCGGGAGTTTCTTTGGAGTGAGAGGGTTAATATTCATAGCCTTCTCACTCCAAAGAGACTCTTTTTTGGCAAGCAAAAGACGGCATACGAGATCAGTGTCATGTGTGGTACTTCGCCGTCTTCGT
FGF6|NM_020996|2035	641	2251	FGF6	NM_020996	2035	TAGAAGACGCACCGGCCATGAATAGTAAAGGAAGATGTTAATATTCATAGCATCTTCCTTTACTGTTCATGGTTTTTTGGCAAGCAAAAGACGGCATACGAGATGTGTGTCATGTGTGGTTGTTCGCCGTCTTCGT
FGF6|NM_020996|2036	642	2251	FGF6	NM_020996	2036	TAGAAGACGCACCGGGGACAGAAACTGTTCATTACTGTTAATATTCATAGCAGTGATGAACAGTTTCTGTCCTTTTTTGGCAAGCAAAAGACGGCATACGAGATTGGTGTCATGTGTGCAGTTTCGCCGTCTTCGT
FGF6|NM_020996|2037	643	2251	FGF6	NM_020996	2037	TAGAAGACGCACCGGCCTATAGCCTGTTGGAAATTTGTTAATATTCATAGCAAATTTCCAGCAGGCTGTAGGTTTTTTGGCAAGCAAAAGACGGCATACGAGATGTGTGTCATGTGTGCACATTCGCCGTCTTCGT
FGF6|NM_020996|2038	644	2251	FGF6	NM_020996	2038	TAGAAGACGCACCGGCCTACATTGCTCTGAGTAAATGTTAATATTCATAGCATTTGCTCAGGGCAATGTAGGTTTTTTGGCAAGCAAAAGACGGCATACGAGATACGTGTCATGTGTGCAACTTCGCCGTCTTCGT
FGF6|NM_020996|2039	645	2251	FGF6	NM_020996	2039	TAGAAGACGCACCGGGCTTCCAAGAAGAATGTAAGTGTTAATATTCATAGCACTTGCATTCTTCTTGGAAGCTTTTTTGGCAAGCAAAAGACGGCATACGAGATCAGTGTCATGTGTGCATGTTCGCCGTCTTCGT
FGF7|NM_002009|2040	646	2252	FGF7	NM_002009	2040	TAGAAGACGCACCGGGACCTAAGAGATGAAGAATAAGTTAATATTCATAGCTTATTCTTCATCTCTTGGGTCTTTTTTGGCAAGCAAAAGACGGCATACGAGATGTGTGTCATGTGTGACGTTTCGCCGTCTTCGT
FGF7|NM_002009|2041	647	2252	FGF7	NM_002009	2041	TAGAAGACGCACCGGCAGATCATGCTTTCACATTATGTTAATATTCATAGCATAATGTGAAAGCATGATCTGTTTTTTGGCAAGCAAAAGACGGCATACGAGATCAGTGTCATGTGTGACCATTCGCCGTCTTCGT
FGF7|NM_002009|2042	648	2252	FGF7	NM_002009	2042	TAGAAGACGCACCGGTCAGCTAAATGGACACATAACGTTAATATTCATAGCGTTGTGTGTCCATTTAGCTGATTTTTTGGCAAGCAAAAGACGGCATACGAGATTGGTGTCATGTGTGACACTTCGCCGTCTTCGT
FGF7|NM_002009|2043	649	2252	FGF7	NM_002009	2043	TAGAAGACGCACCGGGACTCTTCTGTTGAACATAGTGTTAATATTCATAGCACTGTGTTCGACAGAAGAGTCTTTTTTGGCAAGCAAAAGACGGCATACGAGATACGTGTCATGTGTGACTGTTCGCCGTCTTCGT
FGF7|NM_002009|2044	650	2252	FGF7	NM_002009	2044	TAGAAGACGCACCGGTCTGTCTAGTGGGTATTATATGTTAATATTCATAGCATATAGTACCCACTAGACAGATTTTTTGGCAAGCAAAAGACGGCATACGAGATCAGTGTCATGTGTGTGGTTTCGCCGTCTTCGT
FGF7|NM_002009|2045	651	2252	FGF7	NM_002009	2045	TAGAAGACGCACCGGTGACATGACTCCAGAGTAAATGTTAATATTCATAGCATTTGCTCTGGAGTCATGTCATTTTTTGGCAAGCAAAAGACGGCATACGAGATACGTGTCATGTGTGTGCATTCGCCGTCTTCGT
FGF7|NM_002009|2046	652	2252	FGF7	NM_002009	2046	TAGAAGACGCACCGGGTTGGAATTGTGGCAATTAAAGTTAATATTCATAGCTTTGATTGCCACAATTCCAACTTTTTTGGCAAGCAAAAGACGGCATACGAGATGTGTGTCATGTGTGTGACTTCGCCGTCTTCGT
FGF11|NM_004112|2047	653	2256	FGF11	NM_004112	2047	TAGAAGACGCACCGGGCTCTATAGTTCGCCGTATTTGTTAATATTCATAGCAAATGCGGCGAACTGTAGAGCTTTTTTGGCAAGCAAAAGACGGCATACGAGATTGGTGTCATGTGTGTGTGTTCGCCGTCTTCGT
FGF11|NM_004112|2048	654	2256	FGF11	NM_004112	2048	TAGAAGACGCACCGGCATGAAGGGAAACTGAGTTAAGTTAATATTCATAGCTTAACTCGGTTTCCCTTCATGTTTTTTGGCAAGCAAAAGACGGCATACGAGATACGTGTACGTGTGTGTGTTTCGCCGTCTTCGT
FGF11|NM_004112|2049	655	2256	FGF11	NM_004112	2049	TAGAAGACGCACCGGAAGGGGTGTGTCTTTGAGGATGTTAATATTCATAGCATTCTCAAAGACACACTCCTTTTTTTTGGCAAGCAAAAGACGGCATACGAGATTGGTGTACGTGTGTGTCATTCGCCGTCTTCGT
FGF11|NM_004112|2050	656	2256	FGF11	NM_004112	2050	TAGAAGACGCACCGGGAAGGGAAACTGAGTTAAGAAGTTAATATTCATAGCTTCTTAACTCGGTTTCCCTTCTTTTTTGGCAAGCAAAAGACGGCATACGAGATCAGTGTACGTGTGTGTACTTCGCCGTCTTCGT
FGF11|NM_004112|2051	657	2256	FGF11	NM_004112	2051	TAGAAGACGCACCGGGGTCACTATATGGCTATGAATGTTAATATTCATAGCATTCATGGCCATGTAGTGACCTTTTTTGGCAAGCAAAAGACGGCATACGAGATGTGTGTACGTGTGTGTTGTTCGCCGTCTTCGT
FGF11|NM_004112|2052	658	2256	FGF11	NM_004112	2052	TAGAAGACGCACCGGTCAAAGGCATCGTTACCAAATGTTAATATTCATAGCGTTTGGTGACGATGCCTTTGATTTTTTGGCAAGCAAAAGACGGCATACGAGATTGGTGTACGTGTGTCAGTTTCGCCGTCTTCGT
FGF11|NM_004112|2053	659	2256	FGF11	NM_004112	2053	TAGAAGACGCACCGGACAGTTGAGTGTTGCTTTAAGGTTAATATTCATAGCCTTAAAGCGACACTCAGCTGTTTTTTTGGCAAGCAAAAGACGGCATACGAGATGTGTGTACGTGTGTCACATTCGCCGTCTTCGT
FGF11|NM_004112|2054	660	2256	FGF11	NM_004112	2054	TAGAAGACGCACCGGGTCACTATATGGCTATGAATGGTTAATATTCATAGCCATTCATGGCCATGTAGTGACTTTTTTGGCAAGCAAAAGACGGCATACGAGATACGTGTACGTGTGTCAACTTCGCCGTCTTCGT
FGFR3|NM_000142|2055	661	2261	FGFR3	NM_000142	2055	TAGAAGACGCACCGGTGCGTTGTGGAGAATAAGTTTGTTAATATTCATAGCAAACTTGTTCTCCACGACGCATTTTTTGGCAAGCAAAAGACGGCATACGAGATCAGTGTACGTGTGTCATGTTCGCCGTCTTCGT
FGFR3|NM_000142|2056	662	2261	FGFR3	NM_000142	2056	TAGAAGACGCACCGGGCACAACCTCGATTACTATAAGTTAATATTCATAGCTTGTAGTAGTCGAGGTTGTGCTTTTTTGGCAAGCAAAAGACGGCATACGAGATGTGTGTACGTGTGTACGTTTCGCCGTCTTCGT
FGFR3|NM_000142|2057	663	2261	FGFR3	NM_000142	2057	TAGAAGACGCACCGGGTAGCTGTGAAGATGTTGAAAGTTAATATTCATAGCTTTCAGCATCTTCACGGCTACTTTTTTGGCAAGCAAAAGACGGCATACGAGATCAGTGTACGTGTGTACCATTCGCCGTCTTCGT
FGFR3|NM_000142|2058	664	2261	FGFR3	NM_000142	2058	TAGAAGACGCACCGGGTGAAGATGCTGAAAGATGATGTTAATATTCATAGCATCGTCTTTCAGCATCTTCACTTTTTTGGCAAGCAAAAGACGGCATACGAGATTGGTGTACGTGTGTACACTTCGCCGTCTTCGT
FGFR3|NM_000142|2059	665	2261	FGFR3	NM_000142	2059	TAGAAGACGCACCGGGAAGATGATCGGGAAATACAAGTTAATATTCATAGCTTGTGTTTCCCGATCATCTTCTTTTTTGGCAAGCAAAAGACGGCATACGAGATACGTGTACGTGTGTACTGTTCGCCGTCTTCGT
FGFR3|NM_000142|2060	666	2261	FGFR3	NM_000142	2060	TAGAAGACGCACCGGAAAGACGATGCTACTGATAAGGTTAATATTCATAGCCTTGTCAGTGGCATCGTCTTTTTTTTTGGCAAGCAAAAGACGGCATACGAGATCAGTGTACGTGTGTTGGTTTCGCCGTCTTCGT
FGFR3|NM_000142|2061	667	2261	FGFR3	NM_000142	2061	TAGAAGACGCACCGGGATGAAGATGATCGGGAAATAGTTAATATTCATAGCTGTTTCCCGATCATCTTCATCTTTTTTGGCAAGCAAAAGACGGCATACGAGATACGTGTACGTGTGTTGCATTCGCCGTCTTCGT
FGFR3|NM_000142|2062	668	2261	FGFR3	NM_000142	2062	TAGAAGACGCACCGGTCTGAGATGGAGGTGATGGAGGTTAATATTCATAGCCTTCATCATCTCCATCTCAGATTTTTTGGCAAGCAAAAGACGGCATACGAGATGTGTGTACGTGTGTTGACTTCGCCGTCTTCGT
FGFR2|NM_000141|2063	669	2263	FGFR2	NM_000141	2063	TAGAAGACGCACCGGGCCACCAACCAAATACTAAATGTTAATATTCATAGCATTTGGTATTTGGTTGGTGGCTTTTTTGGCAAGCAAAAGACGGCATACGAGATTGGTGTACGTGTGTTGTGTTCGCCGTCTTCGT
FGFR2|NM_000141|2064	670	2263	FGFR2	NM_000141	2064	TAGAAGACGCACCGGGCCAACCTTTCGAATAGTATTGTTAATATTCATAGCAATACTGTTCGAGAGGTTGGCTTTTTTGGCAAGCAAAAGACGGCATACGAGATCAGTGTACGTGTCAGTGTTTCGCCGTCTTCGT
FGFR2|NM_000141|2065	671	2263	FGFR2	NM_000141	2065	TAGAAGACGCACCGGAGCCTTGTTTGATAGAGTATAGTTAATATTCATAGCTATACTCTATCAAACAGGGCTTTTTTTGGCAAGCAAAAGACGGCATACGAGATACGTGTACGTGTCAGTCATTCGCCGTCTTCGT
FGFR2|NM_000141|2066	672	2263	FGFR2	NM_000141	2066	TAGAAGACGCACCGGGCCGTGATTAGTTGGATTAAGGTTAATATTCATAGCCTTAGTCCAACTGATCACGGCTTTTTTGGCAAGCAAAAGACGGCATACGAGATGTGTGTACGTGTCAGTACTTCGCCGTCTTCGT
FGFR2|NM_000141|2067	673	2263	FGFR2	NM_000141	2067	TAGAAGACGCACCGGGTCCTATCTGATAAGGGAAATGTTAATATTCATAGCATTTCCCTTGTCAGATGGGACTTTTTTGGCAAGCAAAAGACGGCATACGAGATTGGTGTACGTGTCAGTTGTTCGCCGTCTTCGT
FGFR2|NM_000141|2068	674	2263	FGFR2	NM_000141	2068	TAGAAGACGCACCGGGCTGAAGGAGGGACATAGAATGTTAATATTCATAGCATTCTGTGTCCTTCCTTCAGCTTTTTTGGCAAGCAAAAGACGGCATACGAGATACGTGTACGTGTCACAGTTTCGCCGTCTTCGT
FGFR2|NM_000141|2069	675	2263	FGFR2	NM_000141	2069	TAGAAGACGCACCGGAATGAATACGGGTCCATTAATGTTAATATTCATAGCATTGATGGACCCGTATTCATTTTTTTTGGCAAGCAAAAGACGGCATACGAGATTGGTGTACGTGTCACACATTCGCCGTCTTCGT
FGFR2|NM_000141|2070	676	2263	FGFR2	NM_000141	2070	TAGAAGACGCACCGGGTGATCAGTTGGATTAAGGATGTTAATATTCATAGCATCCTTAGTCCAACTGATCACTTTTTTGGCAAGCAAAAGACGGCATACGAGATCAGTGTACGTGTCACAACTTCGCCGTCTTCGT
FGG|NM_000509|2071	677	2266	FGG	NM_000509	2071	TAGAAGACGCACCGGGCCATCTTAATGGAGTTTATTGTTAATATTCATAGCAATAAACTCCATTGAGATGGCTTTTTTGGCAAGCAAAAGACGGCATACGAGATGTGTGTACGTGTCACATGTTCGCCGTCTTCGT
FGG|NM_000509|2072	678	2266	FGG	NM_000509	2072	TAGAAGACGCACCGGGCTGTATCTTAGATGAAAGATGTTAATATTCATAGCATCTTTCATCTAAGATGCAGCTTTTTTGGCAAGCAAAAGACGGCATACGAGATTGGTGTACGTGTCAACGTTTCGCCGTCTTCGT
FGG|NM_000509|2073	679	2266	FGG	NM_000509	2073	TAGAAGACGCACCGGGACATCTTACATCAAGTTGAAGTTAATATTCATAGCTTCAACTTGATGTAAGATGTCTTTTTTGGCAAGCAAAAGACGGCATACGAGATGTGTGTACGTGTCAACCATTCGCCGTCTTCGT
FGG|NM_000509|2074	680	2266	FGG	NM_000509	2074	TAGAAGACGCACCGGGATTGTCAAGACATTGTCAATGTTAATATTCATAGCATTGGCAATGTCTTGACAATCTTTTTTGGCAAGCAAAAGACGGCATACGAGATACGTGTACGTGTCAACACTTCGCCGTCTTCGT
FGG|NM_000509|2075	681	2266	FGG	NM_000509	2075	TAGAAGACGCACCGGAGTACCTGGGACAATGATAATGTTAATATTCATAGCATTGTCATTGTCCCAGGTACTTTTTTTGGCAAGCAAAAGACGGCATACGAGATCAGTGTACGTGTCAACTGTTCGCCGTCTTCGT
FGG|NM_000509|2076	682	2266	FGG	NM_000509	2076	TAGAAGACGCACCGGGCAGATTTCCTGTCTATTTATGTTAATATTCATAGCATAAGTAGACAGGAAATCTGCTTTTTTGGCAAGCAAAAGACGGCATACGAGATGTGTGTACGTGTCATGGTTTCGCCGTCTTCGT
FGG|NM_000509|2077	683	2266	FGG	NM_000509	2077	TAGAAGACGCACCGGGATGTCTTTGATGGCTTTGATGTTAATATTCATAGCATCAAAGCCATCAAAGGCATCTTTTTTGGCAAGCAAAAGACGGCATACGAGATCAGTGTACGTGTCATGCATTCGCCGTCTTCGT
FGG|NM_000509|2078	684	2266	FGG	NM_000509	2078	TAGAAGACGCACCGGCCCATTCAACAGACTCATAATGTTAATATTCATAGCATTGTGAGTCTGTTGAATGGGTTTTTTGGCAAGCAAAAGACGGCATACGAGATTGGTGTACGTGTCATGACTTCGCCGTCTTCGT
FHIT|NM_001166243|2079	685	2272	FHIT	NM_001166243	2079	TAGAAGACGCACCGGGCTGGAGGCTTTCATAGGAATGTTAATATTCATAGCATTCCTGTGAAAGTCTCCAGCTTTTTTGGCAAGCAAAAGACGGCATACGAGATACGTGTACGTGTCATGTGTTCGCCGTCTTCGT
FHIT|NM_001166243|2080	686	2272	FHIT	NM_001166243	2080	TAGAAGACGCACCGGCTTGGAGATTAGAGGAGGAAGGTTAATATTCATAGCTTTCCTCCTCTGATCTCCAAGTTTTTTGGCAAGCAAAAGACGGCATACGAGATGTGTGTACGTGTACGTGTTTCGCCGTCTTCGT
FHIT|NM_001166243|2081	687	2272	FHIT	NM_001166243	2081	TAGAAGACGCACCGGGTGAATAGGAAACTTGTGGTAGTTAATATTCATAGCTACCACAGGTTTCCTATTCACTTTTTTGGCAAGCAAAAGACGGCATACGAGATCAGTGTACGTGTACGTCATTCGCCGTCTTCGT
FHIT|NM_001166243|2082	688	2272	FHIT	NM_001166243	2082	TAGAAGACGCACCGGCCCTCTGTAGTGTTTCTTAAAGTTAATATTCATAGCTTTGAGAAACACTACAGAGGGTTTTTTGGCAAGCAAAAGACGGCATACGAGATTGGTGTACGTGTACGTACTTCGCCGTCTTCGT
FHIT|NM_001166243|2083	689	2272	FHIT	NM_001166243	2083	TAGAAGACGCACCGGTTGGAGATTAGAGGAGGAAATGTTAATATTCATAGCATTTCCTCCTCTGATCTCCAATTTTTTGGCAAGCAAAAGACGGCATACGAGATACGTGTACGTGTACGTTGTTCGCCGTCTTCGT
FHIT|NM_001166243|2084	690	2272	FHIT	NM_001166243	2084	TAGAAGACGCACCGGCTGTTCTTCGTTCTTGTGAATGTTAATATTCATAGCATTCACAAGAGCGAAGGACAGTTTTTTGGCAAGCAAAAGACGGCATACGAGATCAGTGTACGTGTACCAGTTTCGCCGTCTTCGT
FHIT|NM_001166243|2085	691	2272	FHIT	NM_001166243	2085	TAGAAGACGCACCGGTATGAGGAGCTCCAGAAATATGTTAATATTCATAGCATGTTTCTGGAGCTCCTCATATTTTTTGGCAAGCAAAAGACGGCATACGAGATACGTGTACGTGTACCACATTCGCCGTCTTCGT
FHIT|NM_001166243|2086	692	2272	FHIT	NM_001166243	2086	TAGAAGACGCACCGGCGTCTTGATGAAGTGGCTGATGTTAATATTCATAGCATCGGCCACTTCATCAGGACGTTTTTTGGCAAGCAAAAGACGGCATACGAGATGTGTGTACGTGTACCAACTTCGCCGTCTTCGT
IKZF3|NM_001257408|2087	693	22806	IKZF3	NM_001257408	2087	TAGAAGACGCACCGGGCTCTTGTACTGGATAGATTAGTTAATATTCATAGCTAATCTGTCCAGTACGAGAGCTTTTTTGGCAAGCAAAAGACGGCATACGAGATTGGTGTACGTGTACCATGTTCGCCGTCTTCGT
IKZF3|NM_001257408|2088	694	22806	IKZF3	NM_001257408	2088	TAGAAGACGCACCGGCGAGTGTAATATGTGTGGATAGTTAATATTCATAGCTATCCACACATGTTACACTCGTTTTTTGGCAAGCAAAAGACGGCATACGAGATACGTGTACGTGTACACGTTTCGCCGTCTTCGT
IKZF3|NM_001257408|2089	695	22806	IKZF3	NM_001257408	2089	TAGAAGACGCACCGGCCACTGCTTTGATGTTAACTAGTTAATATTCATAGCTAGTTGACATCAAAGCAGTGGTTTTTTGGCAAGCAAAAGACGGCATACGAGATTGGTGTACGTGTACACCATTCGCCGTCTTCGT
IKZF3|NM_001257408|2090	696	22806	IKZF3	NM_001257408	2090	TAGAAGACGCACCGGGGACATATTCTGTGGAGAAATGTTAATATTCATAGCGTTTCTCCACAGAATGTGTCCTTTTTTGGCAAGCAAAAGACGGCATACGAGATCAGTGTACGTGTACACACTTCGCCGTCTTCGT
IKZF3|NM_001257408|2091	697	22806	IKZF3	NM_001257408	2091	TAGAAGACGCACCGGAAAGCTCAATGCCTTAGAAATGTTAATATTCATAGCATTTCTGAGGCATTGAGCTTTTTTTTTGGCAAGCAAAAGACGGCATACGAGATGTGTGTACGTGTACACTGTTCGCCGTCTTCGT
IKZF3|NM_001257408|2092	698	22806	IKZF3	NM_001257408	2092	TAGAAGACGCACCGGAACCATGAAGAACGCTAGAATGTTAATATTCATAGCATTCTGGCGTTCTTCATGGTTTTTTTTGGCAAGCAAAAGACGGCATACGAGATTGGTGTACGTGTACTGGTTTCGCCGTCTTCGT
IKZF3|NM_001257408|2093	699	22806	IKZF3	NM_001257408	2093	TAGAAGACGCACCGGGAAGCCATATTGTGGAGAAATGTTAATATTCATAGCGTTTCTCCACAGTATGGCTTCTTTTTTGGCAAGCAAAAGACGGCATACGAGATGTGTGTACGTGTACTGCATTCGCCGTCTTCGT
DIS3|NM_001128226|2094	700	22894	DIS3	NM_001128226	2094	TAGAAGACGCACCGGCGGAGAATTATTGTTGCTATTGTTAATATTCATAGCAATAGCAACAATAATTCTCCGTTTTTTGGCAAGCAAAAGACGGCATACGAGATACGTGTACGTGTACTGACTTCGCCGTCTTCGT
DIS3|NM_001128226|2095	701	22894	DIS3	NM_001128226	2095	TAGAAGACGCACCGGCCCTGTCATTAGGAATGTAATGTTAATATTCATAGCATTACATTCCTGATGGCAGGGTTTTTTGGCAAGCAAAAGACGGCATACGAGATCAGTGTACGTGTACTGTGTTCGCCGTCTTCGT
DIS3|NM_001128226|2096	702	22894	DIS3	NM_001128226	2096	TAGAAGACGCACCGGCCCACTAGGATGTATTGATATGTTAATATTCATAGCATATCAGTACATCCTGGTGGGTTTTTTGGCAAGCAAAAGACGGCATACGAGATTGGTGTACGTGTTGGTGTTTCGCCGTCTTCGT
DIS3|NM_001128226|2097	703	22894	DIS3	NM_001128226	2097	TAGAAGACGCACCGGCCCGAACTTATAGATTGTCTTGTTAATATTCATAGCAAGACGATCTATGAGTTCGGGTTTTTTGGCAAGCAAAAGACGGCATACGAGATGTGTGTACGTGTTGGTCATTCGCCGTCTTCGT
DIS3|NM_001128226|2098	704	22894	DIS3	NM_001128226	2098	TAGAAGACGCACCGGGTCTCCAATATACACACATTTGTTAATATTCATAGCAAATGTGTGTATATTGGAGACTTTTTTGGCAAGCAAAAGACGGCATACGAGATACGTGTACGTGTTGGTACTTCGCCGTCTTCGT
DIS3|NM_001128226|2099	705	22894	DIS3	NM_001128226	2099	TAGAAGACGCACCGGGTAAGTGAAGAAGCCTATATTGTTAATATTCATAGCAATATAGGCTTCTTCACTTACTTTTTTGGCAAGCAAAAGACGGCATACGAGATCAGTGTACGTGTTGGTTGTTCGCCGTCTTCGT
DIS3|NM_001128226|2100	706	22894	DIS3	NM_001128226	2100	TAGAAGACGCACCGGGAATGCCATTGTGGTATTAATGTTAATATTCATAGCATTAATACCACAATGGCATTCTTTTTTGGCAAGCAAAAGACGGCATACGAGATGTGTGTACGTGTTGCAGTTTCGCCGTCTTCGT
DIS3|NM_001128226|2101	707	22894	DIS3	NM_001128226	2101	TAGAAGACGCACCGGGTCTGAAGAAGGGGATGAGATGTTAATATTCATAGCATTTCATTCCCTTCTTCAGACTTTTTTGGCAAGCAAAAGACGGCATACGAGATCAGTGTACGTGTTGCACATTCGCCGTCTTCGT
KLRK1|NM_007360|2102	708	22914	KLRK1	NM_007360	2102	TAGAAGACGCACCGGCCCAACCTACTAACAATAATTGTTAATATTCATAGCAATTATTGTTAGTAGGTTGGGTTTTTTGGCAAGCAAAAGACGGCATACGAGATTGGTGTACGTGTTGCAACTTCGCCGTCTTCGT
KLRK1|NM_007360|2103	709	22914	KLRK1	NM_007360	2103	TAGAAGACGCACCGGGCTGTATTCCTAAACTCATTAGTTAATATTCATAGCTAATGAGTTTAGGAATACAGCTTTTTTGGCAAGCAAAAGACGGCATACGAGATACGTGTACGTGTTGCATGTTCGCCGTCTTCGT
KLRK1|NM_007360|2104	710	22914	KLRK1	NM_007360	2104	TAGAAGACGCACCGGCCTCGAGCTTTAAAGGTTATAGTTAATATTCATAGCTATAGCCTTTAAAGCTCGAGGTTTTTTGGCAAGCAAAAGACGGCATACGAGATCAGTGTACGTGTTGACGTTTCGCCGTCTTCGT
KLRK1|NM_007360|2105	711	22914	KLRK1	NM_007360	2105	TAGAAGACGCACCGGCTAGTACACATTCCAACAAATGTTAATATTCATAGCATTTGTTGGAATGTGTACTAGTTTTTTGGCAAGCAAAAGACGGCATACGAGATACGTGTACGTGTTGACCATTCGCCGTCTTCGT
KLRK1|NM_007360|2106	712	22914	KLRK1	NM_007360	2106	TAGAAGACGCACCGGCAAATTCCCTTGACTGAAAGTGTTAATATTCATAGCACTTTCGGTCAAGGGAATTTGTTTTTTGGCAAGCAAAAGACGGCATACGAGATGTGTGTACGTGTTGACACTTCGCCGTCTTCGT
KLRK1|NM_007360|2107	713	22914	KLRK1	NM_007360	2107	TAGAAGACGCACCGGAAAGCAAAGATGTCTAGTAGTGTTAATATTCATAGCACTACTGGACATCTTTGCTTTTTTTTTGGCAAGCAAAAGACGGCATACGAGATTGGTGTACGTGTTGACTGTTCGCCGTCTTCGT
KLRK1|NM_007360|2108	714	22914	KLRK1	NM_007360	2108	TAGAAGACGCACCGGGGATTTGAAGAAGAGTGATTTGTTAATATTCATAGCAAATCACTCTTCTTCAGATCCTTTTTTGGCAAGCAAAAGACGGCATACGAGATACGTGTACGTGTTGTGGTTTCGCCGTCTTCGT
KLRK1|NM_007360|2109	715	22914	KLRK1	NM_007360	2109	TAGAAGACGCACCGGTACGTACATCTGCATGTAAAGGTTAATATTCATAGCCTTTGCATGCAGATGTACGTATTTTTTGGCAAGCAAAAGACGGCATACGAGATTGGTGTACGTGTTGTGCATTCGCCGTCTTCGT
RAB3GAP1|NM_001172435|2110	716	22930	RAB3GAP1	NM_001172435	2110	TAGAAGACGCACCGGGAAGTCTTGAATGATTGGAAAGTTAATATTCATAGCTTTCCAGTCATTCAAGACTTCTTTTTTGGCAAGCAAAAGACGGCATACGAGATCAGTGTACGTGTTGTGACTTCGCCGTCTTCGT
RAB3GAP1|NM_001172435|2111	717	22930	RAB3GAP1	NM_001172435	2111	TAGAAGACGCACCGGGCCTCCAGTTAGTATTGTTATGTTAATATTCATAGCATAGCAATACTAACTGGAGGCTTTTTTGGCAAGCAAAAGACGGCATACGAGATGTGTGTACGTGTTGTGTGTTCGCCGTCTTCGT
RAB3GAP1|NM_001172435|2112	718	22930	RAB3GAP1	NM_001172435	2112	TAGAAGACGCACCGGCGGATGAAGATTCCAAGTAATGTTAATATTCATAGCATTGCTTGGAATCTTCATCCGTTTTTTGGCAAGCAAAAGACGGCATACGAGATCAGTGTACGTCAGTGTGTTTCGCCGTCTTCGT
RAB3GAP1|NM_001172435|2113	719	22930	RAB3GAP1	NM_001172435	2113	TAGAAGACGCACCGGCCTCAGTGTTTGTTAGGTGGTGTTAATATTCATAGCATCACCTAGCAAACACTGAGGTTTTTTGGCAAGCAAAAGACGGCATACGAGATACGTGTACGTCAGTGTCATTCGCCGTCTTCGT
RAB3GAP1|NM_001172435|2114	720	22930	RAB3GAP1	NM_001172435	2114	TAGAAGACGCACCGGAGAGGAGTCACCGTTAAATAAGTTAATATTCATAGCTTATTTAGCGGTGACTCCTCTTTTTTTGGCAAGCAAAAGACGGCATACGAGATGTGTGTACGTCAGTGTACTTCGCCGTCTTCGT
RAB3GAP1|NM_001172435|2115	721	22930	RAB3GAP1	NM_001172435	2115	TAGAAGACGCACCGGGGACTTAAGGAGATGGTAAATGTTAATATTCATAGCATTTGCCATCTCCTTAGGTCCTTTTTTGGCAAGCAAAAGACGGCATACGAGATTGGTGTACGTCAGTGTTGTTCGCCGTCTTCGT
RAB3GAP1|NM_001172435|2116	722	22930	RAB3GAP1	NM_001172435	2116	TAGAAGACGCACCGGGGAGTGATAGTGAAGAAGAATGTTAATATTCATAGCATTCTTCTTCGCTGTCACTCCTTTTTTGGCAAGCAAAAGACGGCATACGAGATACGTGTACGTCAGTCAGTTTCGCCGTCTTCGT
RAB3GAP1|NM_001172435|2117	723	22930	RAB3GAP1	NM_001172435	2117	TAGAAGACGCACCGGGGTGCCATTCTTTGTGTAAATGTTAATATTCATAGCATTTGCACAAAGAGTGGCACCTTTTTTGGCAAGCAAAAGACGGCATACGAGATTGGTGTACGTCAGTCACATTCGCCGTCTTCGT
SNW1|NM_012245|2118	724	22938	SNW1	NM_012245	2118	TAGAAGACGCACCGGGAACAATAAGAGTGGAAGATTGTTAATATTCATAGCAATCTTCCACTCTTGTTGTTCTTTTTTGGCAAGCAAAAGACGGCATACGAGATCAGTGTACGTCAGTCAACTTCGCCGTCTTCGT
SNW1|NM_012245|2119	725	22938	SNW1	NM_012245	2119	TAGAAGACGCACCGGCCCAAGGAATACGAGTATGAAGTTAATATTCATAGCTTCATGCTCGTGTTCCTTGGGTTTTTTGGCAAGCAAAAGACGGCATACGAGATGTGTGTACGTCAGTCATGTTCGCCGTCTTCGT
SNW1|NM_012245|2120	726	22938	SNW1	NM_012245	2120	TAGAAGACGCACCGGGGAGCTAAATAGAGGGTTATTGTTAATATTCATAGCAATAACCCTCTGTTTAGCTCCTTTTTTGGCAAGCAAAAGACGGCATACGAGATTGGTGTACGTCAGTACGTTTCGCCGTCTTCGT
SNW1|NM_012245|2121	727	22938	SNW1	NM_012245	2121	TAGAAGACGCACCGGGCCCGATGAAGAAGTTATTAAGTTAATATTCATAGCTTAATAGCTTCTTCATCGGGCTTTTTTGGCAAGCAAAAGACGGCATACGAGATGTGTGTACGTCAGTACCATTCGCCGTCTTCGT
SNW1|NM_012245|2122	728	22938	SNW1	NM_012245	2122	TAGAAGACGCACCGGATTGCTCTCGGTGTTCTTAATGTTAATATTCATAGCATTAGGAACACCGAGAGCAATTTTTTTGGCAAGCAAAAGACGGCATACGAGATACGTGTACGTCAGTACACTTCGCCGTCTTCGT
SNW1|NM_012245|2123	729	22938	SNW1	NM_012245	2123	TAGAAGACGCACCGGGTTCTAAAGGAGGTTATGAATGTTAATATTCATAGCATTCATAACCTCCTTTGGAACTTTTTTGGCAAGCAAAAGACGGCATACGAGATCAGTGTACGTCAGTACTGTTCGCCGTCTTCGT
SNW1|NM_012245|2124	730	22938	SNW1	NM_012245	2124	TAGAAGACGCACCGGGAGCCTCTAAGGTTTAAGATTGTTAATATTCATAGCAATCTTGAACCTTGGAGGCTCTTTTTTGGCAAGCAAAAGACGGCATACGAGATGTGTGTACGTCAGTTGGTTTCGCCGTCTTCGT
SNW1|NM_012245|2125	731	22938	SNW1	NM_012245	2125	TAGAAGACGCACCGGCTGGAGAGGTGGTAGAGATGTGTTAATATTCATAGCATATCTTTACCACCTCTCCAGTTTTTTGGCAAGCAAAAGACGGCATACGAGATCAGTGTACGTCAGTTGCATTCGCCGTCTTCGT
DKK1|NM_012242|2126	732	22943	DKK1	NM_012242	2126	TAGAAGACGCACCGGCGGTTCTCAATTTCAACGTTAGTTAATATTCATAGCTAGCGTTGGAATTGAGAACCGTTTTTTGGCAAGCAAAAGACGGCATACGAGATTGGTGTACGTCAGTTGACTTCGCCGTCTTCGT
DKK1|NM_012242|2127	733	22943	DKK1	NM_012242	2127	TAGAAGACGCACCGGCCTGTCTTGAAAGAAGGTTAAGTTAATATTCATAGCTTGACCTTCTTTCAGGACAGGTTTTTTGGCAAGCAAAAGACGGCATACGAGATACGTGTACGTCAGTTGTGTTCGCCGTCTTCGT
DKK1|NM_012242|2128	734	22943	DKK1	NM_012242	2128	TAGAAGACGCACCGGGCCAGTAATTCTTCTAGGTTTGTTAATATTCATAGCAAGCCTAGAAGAATTACTGGCTTTTTTGGCAAGCAAAAGACGGCATACGAGATGTGTGTACGTCACAGTGTTTCGCCGTCTTCGT
DKK1|NM_012242|2129	735	22943	DKK1	NM_012242	2129	TAGAAGACGCACCGGCCAGAAGAATCACTTTGTCTTGTTAATATTCATAGCAAGACAAGGTGGTTCTTCTGGTTTTTTGGCAAGCAAAAGACGGCATACGAGATCAGTGTACGTCACAGTCATTCGCCGTCTTCGT
DKK1|NM_012242|2130	736	22943	DKK1	NM_012242	2130	TAGAAGACGCACCGGACACTTGTCAGAGACATTAAAGTTAATATTCATAGCTTTAGTGTCTCTGACAAGTGTTTTTTTGGCAAGCAAAAGACGGCATACGAGATTGGTGTACGTCACAGTACTTCGCCGTCTTCGT
DKK1|NM_012242|2131	737	22943	DKK1	NM_012242	2131	TAGAAGACGCACCGGGATCACCATCAAGCTAGTAATGTTAATATTCATAGCATTACTGGCTTGATGGTGATCTTTTTTGGCAAGCAAAAGACGGCATACGAGATACGTGTACGTCACAGTTGTTCGCCGTCTTCGT
DKK1|NM_012242|2132	738	22943	DKK1	NM_012242	2132	TAGAAGACGCACCGGGAAGGTTAAGTGTGTACTAAGGTTAATATTCATAGCCTTGGTACACACTTGACCTTCTTTTTTGGCAAGCAAAAGACGGCATACGAGATCAGTGTACGTCACACAGTTTCGCCGTCTTCGT
SNRNP200|NM_014014|2133	739	23020	SNRNP200	NM_014014	2133	TAGAAGACGCACCGGCCCAGGTGTTTAACATTGTATGTTAATATTCATAGCATACAGTGTTAAACACCTGGGTTTTTTGGCAAGCAAAAGACGGCATACGAGATACGTGTACGTCACACACATTCGCCGTCTTCGT
SNRNP200|NM_014014|2134	740	23020	SNRNP200	NM_014014	2134	TAGAAGACGCACCGGCCCTGCACATATAGTCATTATGTTAATATTCATAGCATGATGACTGTATGTGCAGGGTTTTTTGGCAAGCAAAAGACGGCATACGAGATGTGTGTACGTCACACAACTTCGCCGTCTTCGT
SNRNP200|NM_014014|2135	741	23020	SNRNP200	NM_014014	2135	TAGAAGACGCACCGGGCAGCAGAGTATGAGAATATTGTTAATATTCATAGCAATGTTCTCATACTCTGCTGCTTTTTTGGCAAGCAAAAGACGGCATACGAGATTGGTGTACGTCACACATGTTCGCCGTCTTCGT
SNRNP200|NM_014014|2136	742	23020	SNRNP200	NM_014014	2136	TAGAAGACGCACCGGGCAGATGAAGTGTTGGAGGTTGTTAATATTCATAGCAATCTCCAATACTTCATCTGCTTTTTTGGCAAGCAAAAGACGGCATACGAGATACGTGTACGTCACAACGTTTCGCCGTCTTCGT
SNRNP200|NM_014014|2137	743	23020	SNRNP200	NM_014014	2137	TAGAAGACGCACCGGCCAATGATACAGTGCAGATTTGTTAATATTCATAGCAAGTCTGCACTGTATCATTGGTTTTTTGGCAAGCAAAAGACGGCATACGAGATTGGTGTACGTCACAACCATTCGCCGTCTTCGT
SNRNP200|NM_014014|2138	744	23020	SNRNP200	NM_014014	2138	TAGAAGACGCACCGGGCAGAAATCGTGTTAGGAAATGTTAATATTCATAGCATTTCCTAGCACGATTTCTGCTTTTTTGGCAAGCAAAAGACGGCATACGAGATCAGTGTACGTCACAACACTTCGCCGTCTTCGT
SNRNP200|NM_014014|2139	745	23020	SNRNP200	NM_014014	2139	TAGAAGACGCACCGGGATGCGAGTGATATTTGAAATGTTAATATTCATAGCATTTCAAATATCGCTCGCATCTTTTTTGGCAAGCAAAAGACGGCATACGAGATGTGTGTACGTCACAACTGTTCGCCGTCTTCGT
SNRNP200|NM_014014|2140	746	23020	SNRNP200	NM_014014	2140	TAGAAGACGCACCGGGATGTGACCAGGAGTATAAATGTTAATATTCATAGCATTTGTACTCCTGGTCACATCTTTTTTGGCAAGCAAAAGACGGCATACGAGATTGGTGTACGTCACATGGTTTCGCCGTCTTCGT
FOXO1|NM_002015|2141	747	2308	FOXO1	NM_002015	2141	TAGAAGACGCACCGGGCTTAGACTGTGATATGGAATGTTAATATTCATAGCATTCCATGTCACAGTCTAAGCTTTTTTGGCAAGCAAAAGACGGCATACGAGATGTGTGTACGTCACATGCATTCGCCGTCTTCGT
FOXO1|NM_002015|2142	748	2308	FOXO1	NM_002015	2142	TAGAAGACGCACCGGGCCACTAAACACTAGTTTGAAGTTAATATTCATAGCTTCAAACTGGTGTTTGGTGGCTTTTTTGGCAAGCAAAAGACGGCATACGAGATACGTGTACGTCACATGACTTCGCCGTCTTCGT
FOXO1|NM_002015|2143	749	2308	FOXO1	NM_002015	2143	TAGAAGACGCACCGGCAGGACAATAAGTTGAGTTATGTTAATATTCATAGCATAACTCGACTTATTGTCCTGTTTTTTGGCAAGCAAAAGACGGCATACGAGATCAGTGTACGTCACATGTGTTCGCCGTCTTCGT
FOXO1|NM_002015|2144	750	2308	FOXO1	NM_002015	2144	TAGAAGACGCACCGGGCCGGAGTTTAGTCAGTCTAAGTTAATATTCATAGCTTGGACTGGCTAAACTCCGGCTTTTTTGGCAAGCAAAAGACGGCATACGAGATTGGTGTACGTCAACGTGTTTCGCCGTCTTCGT
FOXO1|NM_002015|2145	751	2308	FOXO1	NM_002015	2145	TAGAAGACGCACCGGGCGGGTTGGAAGAATTTAATTGTTAATATTCATAGCAATTGAATTCTTCCAGCCCGCTTTTTTGGCAAGCAAAAGACGGCATACGAGATGTGTGTACGTCAACGTCATTCGCCGTCTTCGT
FOXO1|NM_002015|2146	752	2308	FOXO1	NM_002015	2146	TAGAAGACGCACCGGAGTTCTTGGTGGATGCTTAATGTTAATATTCATAGCATTGAGCATCCACCAAGAACTTTTTTTGGCAAGCAAAAGACGGCATACGAGATACGTGTACGTCAACGTACTTCGCCGTCTTCGT
FOXO1|NM_002015|2147	753	2308	FOXO1	NM_002015	2147	TAGAAGACGCACCGGAACGTTATGATGGGCCTTAATGTTAATATTCATAGCATTAGGGCCCATCATGACGTTTTTTTTGGCAAGCAAAAGACGGCATACGAGATCAGTGTACGTCAACGTTGTTCGCCGTCTTCGT
FOXO1|NM_002015|2148	754	2308	FOXO1	NM_002015	2148	TAGAAGACGCACCGGGAGGTATGAGTCAGTATAATTGTTAATATTCATAGCAGTTATACTGACTCATACCTCTTTTTTGGCAAGCAAAAGACGGCATACGAGATGTGTGTACGTCAACCAGTTTCGCCGTCTTCGT
FOXO3|NM_001455|2149	755	2309	FOXO3	NM_001455	2149	TAGAAGACGCACCGGCATGTTTAATGGGAGTTTGGAGTTAATATTCATAGCTCCAAGCTCCCATTGAACATGTTTTTTGGCAAGCAAAAGACGGCATACGAGATCAGTGTACGTCAACCACATTCGCCGTCTTCGT
FOXO3|NM_001455|2150	756	2309	FOXO3	NM_001455	2150	TAGAAGACGCACCGGGCAGGCACTATGAATTTGAATGTTAATATTCATAGCATTCAGATTCATGGTGCCTGCTTTTTTGGCAAGCAAAAGACGGCATACGAGATTGGTGTACGTCAACCAACTTCGCCGTCTTCGT
FOXO3|NM_001455|2151	757	2309	FOXO3	NM_001455	2151	TAGAAGACGCACCGGATGTGACATGGAGTCTATTATGTTAATATTCATAGCATAATGGACTCCATGTCACATTTTTTTGGCAAGCAAAAGACGGCATACGAGATACGTGTACGTCAACCATGTTCGCCGTCTTCGT
FOXO3|NM_001455|2152	758	2309	FOXO3	NM_001455	2152	TAGAAGACGCACCGGGGACAATAGCAACAAGTATATGTTAATATTCATAGCGTATACTTGTTGCTATTGTCCTTTTTTGGCAAGCAAAAGACGGCATACGAGATCAGTGTACGTCAACACGTTTCGCCGTCTTCGT
FOXO3|NM_001455|2153	759	2309	FOXO3	NM_001455	2153	TAGAAGACGCACCGGCTTCCGTTCACGCATCAATTTGTTAATATTCATAGCGAATTGGTGCGTGAACGGAAGTTTTTTGGCAAGCAAAAGACGGCATACGAGATACGTGTACGTCAACACCATTCGCCGTCTTCGT
FOXO3|NM_001455|2154	760	2309	FOXO3	NM_001455	2154	TAGAAGACGCACCGGGATGAAGTTCAGGATGATGATGTTAATATTCATAGCATCATCGTCCTGGACTTCATCTTTTTTGGCAAGCAAAAGACGGCATACGAGATGTGTGTACGTCAACACACTTCGCCGTCTTCGT
FOXO3|NM_001455|2155	761	2309	FOXO3	NM_001455	2155	TAGAAGACGCACCGGGAAGTTTGGTCAATTAGAACTGTTAATATTCATAGCAGTTCTGATTGACCAAACTTCTTTTTTGGCAAGCAAAAGACGGCATACGAGATTGGTGTACGTCAACACTGTTCGCCGTCTTCGT
FOXO3|NM_001455|2156	762	2309	FOXO3	NM_001455	2156	TAGAAGACGCACCGGTGTTCAATGGGAGTTTGGAATGTTAATATTCATAGCATTCCAAGCTCCCATTGAACATTTTTTGGCAAGCAAAAGACGGCATACGAGATACGTGTACGTCAACTGGTTTCGCCGTCTTCGT
ARHGAP26|NM_001135608|2157	763	23092	ARHGAP26	NM_001135608	2157	TAGAAGACGCACCGGGCTGAACATGACTCAGAATTTGTTAATATTCATAGCAAGTTCTGAGTCATGTTCAGCTTTTTTGGCAAGCAAAAGACGGCATACGAGATTGGTGTACGTCAACTGCATTCGCCGTCTTCGT
ARHGAP26|NM_001135608|2158	764	23092	ARHGAP26	NM_001135608	2158	TAGAAGACGCACCGGGCTTCAGCATAATTAGGAAATGTTAATATTCATAGCATTTCCTGATTATGCTGAAGCTTTTTTGGCAAGCAAAAGACGGCATACGAGATCAGTGTACGTCAACTGACTTCGCCGTCTTCGT
ARHGAP26|NM_001135608|2159	765	23092	ARHGAP26	NM_001135608	2159	TAGAAGACGCACCGGGCTGGACAAGACCAATAAATTGTTAATATTCATAGCAATTTGTTGGTCTTGTCCAGCTTTTTTGGCAAGCAAAAGACGGCATACGAGATGTGTGTACGTCAACTGTGTTCGCCGTCTTCGT
ARHGAP26|NM_001135608|2160	766	23092	ARHGAP26	NM_001135608	2160	TAGAAGACGCACCGGGGAGATGCAGAAATAGATGATGTTAATATTCATAGCATCATCTGTTTCTGCATCTCCTTTTTTGGCAAGCAAAAGACGGCATACGAGATACGTGTACGTCATGGTGTTTCGCCGTCTTCGT
ARHGAP26|NM_001135608|2161	767	23092	ARHGAP26	NM_001135608	2161	TAGAAGACGCACCGGGAGCAAGGGTTGTATTGAATTGTTAATATTCATAGCAATTCGATACAGCCCTTGCTCTTTTTTGGCAAGCAAAAGACGGCATACGAGATTGGTGTACGTCATGGTCATTCGCCGTCTTCGT
ARHGAP26|NM_001135608|2162	768	23092	ARHGAP26	NM_001135608	2162	TAGAAGACGCACCGGTGTGTTGAATGGGAGATAAAGGTTAATATTCATAGCCTTTATCTCCCATTCAGCACATTTTTTGGCAAGCAAAAGACGGCATACGAGATCAGTGTACGTCATGGTACTTCGCCGTCTTCGT
ARHGAP26|NM_001135608|2163	769	23092	ARHGAP26	NM_001135608	2163	TAGAAGACGCACCGGCTATCACCATGGTTATGAACTGTTAATATTCATAGCAGTTCGTAACCATGGTGATAGTTTTTTGGCAAGCAAAAGACGGCATACGAGATGTGTGTACGTCATGGTTGTTCGCCGTCTTCGT
AKR1B1|NM_001628|2164	770	231	AKR1B1	NM_001628	2164	TAGAAGACGCACCGGCCAGGTGGAGATGGTCTTGAAGTTAATATTCATAGCTTTAAGATCATCTCCACCTGGTTTTTTGGCAAGCAAAAGACGGCATACGAGATTGGTGTACGTCATGCAGTTTCGCCGTCTTCGT
AKR1B1|NM_001628|2165	771	231	AKR1B1	NM_001628	2165	TAGAAGACGCACCGGGTTCCCAGTGATACCAATATTGTTAATATTCATAGCAATGTTGGTGTCACTGGGAACTTTTTTGGCAAGCAAAAGACGGCATACGAGATGTGTGTACGTCATGCACATTCGCCGTCTTCGT
AKR1B1|NM_001628|2166	772	231	AKR1B1	NM_001628	2166	TAGAAGACGCACCGGTGTGCCTATGTGTACTAGAATGTTAATATTCATAGCATTCTGGTACACATGGGCACATTTTTTGGCAAGCAAAAGACGGCATACGAGATACGTGTACGTCATGCAACTTCGCCGTCTTCGT
AKR1B1|NM_001628|2167	773	231	AKR1B1	NM_001628	2167	TAGAAGACGCACCGGTGCTGAGAGCTTTAGGGTCTTGTTAATATTCATAGCAAGACCTTAAAGTTCTCAGCATTTTTTGGCAAGCAAAAGACGGCATACGAGATCAGTGTACGTCATGCATGTTCGCCGTCTTCGT
AKR1B1|NM_001628|2168	774	231	AKR1B1	NM_001628	2168	TAGAAGACGCACCGGCCATTGGATGAGTTGGGTAATGTTAATATTCATAGCATTGCCCGACTCATCCAATGGTTTTTTGGCAAGCAAAAGACGGCATACGAGATGTGTGTACGTCATGACGTTTCGCCGTCTTCGT
AKR1B1|NM_001628|2169	775	231	AKR1B1	NM_001628	2169	TAGAAGACGCACCGGTGAATTGAGCAGCTAGGATATGTTAATATTCATAGCATATCCTGGCTGCTCAGTTCATTTTTTGGCAAGCAAAAGACGGCATACGAGATCAGTGTACGTCATGACCATTCGCCGTCTTCGT
AKR1B1|NM_001628|2170	776	231	AKR1B1	NM_001628	2170	TAGAAGACGCACCGGGAAGGGTTGGTGAAAGTTATTGTTAATATTCATAGCAATAGCTTTCACCAGCCCTTCTTTTTTGGCAAGCAAAAGACGGCATACGAGATTGGTGTACGTCATGACACTTCGCCGTCTTCGT
AKR1B1|NM_001628|2171	777	231	AKR1B1	NM_001628	2171	TAGAAGACGCACCGGATCGCAGCCAAGCATAATAAAGTTAATATTCATAGCTTTATTGTGCTTGGCTGCGATTTTTTTGGCAAGCAAAAGACGGCATACGAGATACGTGTACGTCATGACTGTTCGCCGTCTTCGT
ATP10B|NM_025153|2172	778	23120	ATP10B	NM_025153	2172	TAGAAGACGCACCGGATGATGAAGAGACCGATTTATGTTAATATTCATAGCATAAATCGGTCTCTTCATCATTTTTTTGGCAAGCAAAAGACGGCATACGAGATCAGTGTACGTCATGTGGTTTCGCCGTCTTCGT
ATP10B|NM_025153|2173	779	23120	ATP10B	NM_025153	2173	TAGAAGACGCACCGGTGATTCAAGCTGTTGATATTGGTTAATATTCATAGCCAATATCAGCAGCTTGAATCATTTTTTGGCAAGCAAAAGACGGCATACGAGATACGTGTACGTCATGTGCATTCGCCGTCTTCGT
ATP10B|NM_025153|2174	780	23120	ATP10B	NM_025153	2174	TAGAAGACGCACCGGCGTGGGAGATTTCATCTAAATGTTAATATTCATAGCATTTGGATGAAGTCTCCCACGTTTTTTGGCAAGCAAAAGACGGCATACGAGATGTGTGTACGTCATGTGACTTCGCCGTCTTCGT
ATP10B|NM_025153|2175	781	23120	ATP10B	NM_025153	2175	TAGAAGACGCACCGGGCCATTCTAGAAGAGTATGATGTTAATATTCATAGCATCATACTCTTCTGGAGTGGCTTTTTTGGCAAGCAAAAGACGGCATACGAGATTGGTGTACGTCATGTGTGTTCGCCGTCTTCGT
ATP10B|NM_025153|2176	782	23120	ATP10B	NM_025153	2176	TAGAAGACGCACCGGGCCTGTGTACCTGATATTAATGTTAATATTCATAGCATTAATGTCAGGTACGCAGGCTTTTTTGGCAAGCAAAAGACGGCATACGAGATTGGTGTACGTACGTGTGTTTCGCCGTCTTCGT
ATP10B|NM_025153|2177	783	23120	ATP10B	NM_025153	2177	TAGAAGACGCACCGGGAGCCTCATTTGTTTCTTTATGTTAATATTCATAGCATAAAGAAACAGATGAGGCTCTTTTTTGGCAAGCAAAAGACGGCATACGAGATGTGTGTACGTACGTGTCATTCGCCGTCTTCGT
ATP10B|NM_025153|2178	784	23120	ATP10B	NM_025153	2178	TAGAAGACGCACCGGGAAGTATGTGGAAGAGTTAGTGTTAATATTCATAGCACTGACTCTTCCACATGCTTCTTTTTTGGCAAGCAAAAGACGGCATACGAGATACGTGTACGTACGTGTACTTCGCCGTCTTCGT
ATP10B|NM_025153|2179	785	23120	ATP10B	NM_025153	2179	TAGAAGACGCACCGGACACCGCTTTGATAAAGTAATGTTAATATTCATAGCATTGCTTTATCAAAGCGGTGTTTTTTTGGCAAGCAAAAGACGGCATACGAGATCAGTGTACGTACGTGTTGTTCGCCGTCTTCGT
FLI1|NM_001167681|2180	786	2313	FLI1	NM_001167681	2180	TAGAAGACGCACCGGCCCATGAACTACAACAGTTATGTTAATATTCATAGCATAGCTGTTGTAGTTCATGGGTTTTTTGGCAAGCAAAAGACGGCATACGAGATGTGTGTACGTACGTCAGTTTCGCCGTCTTCGT
FLI1|NM_001167681|2181	787	2313	FLI1	NM_001167681	2181	TAGAAGACGCACCGGGCACAAACGATTAGTAAGAATGTTAATATTCATAGCATTCTTACTGATCGTTTGTGCTTTTTTGGCAAGCAAAAGACGGCATACGAGATCAGTGTACGTACGTCACATTCGCCGTCTTCGT
FLI1|NM_001167681|2182	788	2313	FLI1	NM_001167681	2182	TAGAAGACGCACCGGCCCTTCTGACATTTCCTATATGTTAATATTCATAGCATGTAGGAGATGTCAGAAGGGTTTTTTGGCAAGCAAAAGACGGCATACGAGATTGGTGTACGTACGTCAACTTCGCCGTCTTCGT
FLI1|NM_001167681|2183	789	2313	FLI1	NM_001167681	2183	TAGAAGACGCACCGGGCTGTTGTTACACCTTAGTTAGTTAATATTCATAGCTAACTGAGGTGTGACAACAGCTTTTTTGGCAAGCAAAAGACGGCATACGAGATACGTGTACGTACGTCATGTTCGCCGTCTTCGT
FLI1|NM_001167681|2184	790	2313	FLI1	NM_001167681	2184	TAGAAGACGCACCGGAGTTCACTGCTGGCTTATAATGTTAATATTCATAGCATTATAGGCCAGCAGTGAACTTTTTTTGGCAAGCAAAAGACGGCATACGAGATCAGTGTACGTACGTACGTTTCGCCGTCTTCGT
FLI1|NM_001167681|2185	791	2313	FLI1	NM_001167681	2185	TAGAAGACGCACCGGGAACATGGATGGTAAGGAATTGTTAATATTCATAGCAGTTCCTTGCCATCCATGTTCTTTTTTGGCAAGCAAAAGACGGCATACGAGATACGTGTACGTACGTACCATTCGCCGTCTTCGT
FLI1|NM_001167681|2186	792	2313	FLI1	NM_001167681	2186	TAGAAGACGCACCGGTCTTTGGAGCTGCATCATAATGTTAATATTCATAGCATTGTGATGCGGCTCCAAAGATTTTTTGGCAAGCAAAAGACGGCATACGAGATGTGTGTACGTACGTACACTTCGCCGTCTTCGT
FLI1|NM_001167681|2187	793	2313	FLI1	NM_001167681	2187	TAGAAGACGCACCGGTGGACTGCAGTGTTAGTAAATGTTAATATTCATAGCATTTGCTAACGCTGCAGTCCATTTTTTGGCAAGCAAAAGACGGCATACGAGATTGGTGTACGTACGTACTGTTCGCCGTCTTCGT
RTF1|NM_015138|2188	794	23168	RTF1	NM_015138	2188	TAGAAGACGCACCGGGCCAAACAAATCCAAGATTAAGTTAATATTCATAGCTTGATCTTGGATTTGTTTGGCTTTTTTGGCAAGCAAAAGACGGCATACGAGATACGTGTACGTACGTTGGTTTCGCCGTCTTCGT
RTF1|NM_015138|2189	795	23168	RTF1	NM_015138	2189	TAGAAGACGCACCGGCCGTTTAGAGTTTGTCTTAAAGTTAATATTCATAGCTTTGAGACAAACTCTAAACGGTTTTTTGGCAAGCAAAAGACGGCATACGAGATTGGTGTACGTACGTTGCATTCGCCGTCTTCGT
RTF1|NM_015138|2190	796	23168	RTF1	NM_015138	2190	TAGAAGACGCACCGGGCTGAAAGTCACAATATGAAAGTTAATATTCATAGCTTTCATGTTGTGACTTTCAGCTTTTTTGGCAAGCAAAAGACGGCATACGAGATCAGTGTACGTACGTTGACTTCGCCGTCTTCGT
RTF1|NM_015138|2191	797	23168	RTF1	NM_015138	2191	TAGAAGACGCACCGGGCAAGAACTGTTCAATTGCATGTTAATATTCATAGCATGCGATTGAACAGTTCTTGCTTTTTTGGCAAGCAAAAGACGGCATACGAGATGTGTGTACGTACGTTGTGTTCGCCGTCTTCGT
RTF1|NM_015138|2192	798	23168	RTF1	NM_015138	2192	TAGAAGACGCACCGGGTTGCCCACTTTAGATGAAATGTTAATATTCATAGCATTTCATCTAGAGTGGGCAACTTTTTTGGCAAGCAAAAGACGGCATACGAGATACGTGTACGTACCAGTGTTTCGCCGTCTTCGT
RTF1|NM_015138|2193	799	23168	RTF1	NM_015138	2193	TAGAAGACGCACCGGGGTCAAGGTAAAGATAAAGATGTTAATATTCATAGCATCTTTATCTTTGCCTTGACCTTTTTTGGCAAGCAAAAGACGGCATACGAGATTGGTGTACGTACCAGTCATTCGCCGTCTTCGT
RTF1|NM_015138|2194	800	23168	RTF1	NM_015138	2194	TAGAAGACGCACCGGAGAGAGCAAGAACTGTTTAATGTTAATATTCATAGCATTGAACAGTTCTTGCTCTCTTTTTTTGGCAAGCAAAAGACGGCATACGAGATCAGTGTACGTACCAGTACTTCGCCGTCTTCGT
RTF1|NM_015138|2195	801	23168	RTF1	NM_015138	2195	TAGAAGACGCACCGGGAAGAAGAGGAGAAGGAAGGGGTTAATATTCATAGCCTCTTCTTTCTCCTCTTCTTCTTTTTTGGCAAGCAAAAGACGGCATACGAGATGTGTGTACGTACCAGTTGTTCGCCGTCTTCGT
LPIN1|NM_001261427|2196	802	23175	LPIN1	NM_001261427	2196	TAGAAGACGCACCGGGCAGAACTCTTCTTAATGATAGTTAATATTCATAGCTATCATTAGGAAGAGTTCTGCTTTTTTGGCAAGCAAAAGACGGCATACGAGATTGGTGTACGTACCACAGTTTCGCCGTCTTCGT
LPIN1|NM_001261427|2197	803	23175	LPIN1	NM_001261427	2197	TAGAAGACGCACCGGCGAGAGAAAGTGGTTGATATAGTTAATATTCATAGCTATGTCAACCACTTTCTCTCGTTTTTTGGCAAGCAAAAGACGGCATACGAGATGTGTGTACGTACCACACATTCGCCGTCTTCGT
LPIN1|NM_001261427|2198	804	23175	LPIN1	NM_001261427	2198	TAGAAGACGCACCGGGTGGAATTGGGATGATAAAGTGTTAATATTCATAGCACTTTATCATCCCAGTTCCACTTTTTTGGCAAGCAAAAGACGGCATACGAGATACGTGTACGTACCACAACTTCGCCGTCTTCGT
LPIN1|NM_001261427|2199	805	23175	LPIN1	NM_001261427	2199	TAGAAGACGCACCGGTACCATAAAGTGAGCTAGAATGTTAATATTCATAGCATTCTGGCTCACTTTATGGTATTTTTTGGCAAGCAAAAGACGGCATACGAGATCAGTGTACGTACCACATGTTCGCCGTCTTCGT
LPIN1|NM_001261427|2200	806	23175	LPIN1	NM_001261427	2200	TAGAAGACGCACCGGCCACTAGGGTAAAGTATGAATGTTAATATTCATAGCATTCATGCTTTACCCTGGTGGTTTTTTGGCAAGCAAAAGACGGCATACGAGATGTGTGTACGTACCAACGTTTCGCCGTCTTCGT
LPIN1|NM_001261427|2201	807	23175	LPIN1	NM_001261427	2201	TAGAAGACGCACCGGGAACAAGCCTCAGATAGAAATGTTAATATTCATAGCATTTCTGTCTGAGGCTTGTTCTTTTTTGGCAAGCAAAAGACGGCATACGAGATCAGTGTACGTACCAACCATTCGCCGTCTTCGT
LPIN1|NM_001261427|2202	808	23175	LPIN1	NM_001261427	2202	TAGAAGACGCACCGGAGCCTAATGGAAACCTCTAATGTTAATATTCATAGCATTGGAGGTTTCCATTGGGCTTTTTTTGGCAAGCAAAAGACGGCATACGAGATTGGTGTACGTACCAACACTTCGCCGTCTTCGT
LPIN1|NM_001261427|2203	809	23175	LPIN1	NM_001261427	2203	TAGAAGACGCACCGGCAGTCAGCCTTATACCTTAATGTTAATATTCATAGCATTAGGGTATGAGGCTGACTGTTTTTTGGCAAGCAAAAGACGGCATACGAGATACGTGTACGTACCAACTGTTCGCCGTCTTCGT
FLNC|NM_001127487|2204	810	2318	FLNC	NM_001127487	2204	TAGAAGACGCACCGGGCTAAGGTGGTTTCCAATAATGTTAATATTCATAGCATTGTTGGGAACCACCTTAGCTTTTTTGGCAAGCAAAAGACGGCATACGAGATCAGTGTACGTACCATGGTTTCGCCGTCTTCGT
FLNC|NM_001127487|2205	811	2318	FLNC	NM_001127487	2205	TAGAAGACGCACCGGCGGTGTGTCATTAGAGTTTATGTTAATATTCATAGCATGAACTCTGATGACACACCGTTTTTTGGCAAGCAAAAGACGGCATACGAGATACGTGTACGTACCATGCATTCGCCGTCTTCGT
FLNC|NM_001127487|2206	812	2318	FLNC	NM_001127487	2206	TAGAAGACGCACCGGCCAGATAGGGTGAAGGTCTTTGTTAATATTCATAGCAAAGGCCTTCACCTTATCTGGTTTTTTGGCAAGCAAAAGACGGCATACGAGATGTGTGTACGTACCATGACTTCGCCGTCTTCGT
FLNC|NM_001127487|2207	813	2318	FLNC	NM_001127487	2207	TAGAAGACGCACCGGCGGTACCTTTGACATTTACTAGTTAATATTCATAGCTAGTAGATGTCAAAGGTACCGTTTTTTGGCAAGCAAAAGACGGCATACGAGATTGGTGTACGTACCATGTGTTCGCCGTCTTCGT
FLNC|NM_001127487|2208	814	2318	FLNC	NM_001127487	2208	TAGAAGACGCACCGGGACACCTATGTGACAGATAATGTTAATATTCATAGCATTGTCTGTCACATAGGTGTCTTTTTTGGCAAGCAAAAGACGGCATACGAGATCAGTGTACGTACACGTGTTTCGCCGTCTTCGT
FLNC|NM_001127487|2209	815	2318	FLNC	NM_001127487	2209	TAGAAGACGCACCGGAGTTCACTGTGGATGTAAGATGTTAATATTCATAGCATCTTGCATCCACAGTGAACTTTTTTTGGCAAGCAAAAGACGGCATACGAGATACGTGTACGTACACGTCATTCGCCGTCTTCGT
FLNC|NM_001127487|2210	816	2318	FLNC	NM_001127487	2210	TAGAAGACGCACCGGGTGGGTGTGGTTGAGAACTATGTTAATATTCATAGCATGGTTCTCAACCACATCCACTTTTTTGGCAAGCAAAAGACGGCATACGAGATGTGTGTACGTACACGTACTTCGCCGTCTTCGT
FLNC|NM_001127487|2211	817	2318	FLNC	NM_001127487	2211	TAGAAGACGCACCGGCAAGTATGACGGTAACCATATGTTAATATTCATAGCATGTGGTTGCCGTCATACTTGTTTTTTGGCAAGCAAAAGACGGCATACGAGATTGGTGTACGTACACGTTGTTCGCCGTCTTCGT
FLT1|NM_001159920|2212	818	2321	FLT1	NM_001159920	2212	TAGAAGACGCACCGGCGCCGGAAGTTGTGTGGTTGAGTTAATATTCATAGCTTAACCATACAACTTCCGGCGTTTTTTGGCAAGCAAAAGACGGCATACGAGATACGTGTACGTACACCAGTTTCGCCGTCTTCGT
FLT1|NM_001159920|2213	819	2321	FLT1	NM_001159920	2213	TAGAAGACGCACCGGCGTAGAGATGTATAGTGAAATGTTAATATTCATAGCATTTCACTGTACATCTCTACGTTTTTTGGCAAGCAAAAGACGGCATACGAGATTGGTGTACGTACACCACATTCGCCGTCTTCGT
FLT1|NM_001159920|2214	820	2321	FLT1	NM_001159920	2214	TAGAAGACGCACCGGGACTTGAGAGTAACTAGTAAAGTTAATATTCATAGCTTTACTGGTTACTCTCAAGTCTTTTTTGGCAAGCAAAAGACGGCATACGAGATCAGTGTACGTACACCAACTTCGCCGTCTTCGT
FLT1|NM_001159920|2215	821	2321	FLT1	NM_001159920	2215	TAGAAGACGCACCGGCGTGTGGTCTTATGGAGTGTTGTTAATATTCATAGCAATACTCCGTAAGACCACACGTTTTTTGGCAAGCAAAAGACGGCATACGAGATGTGTGTACGTACACCATGTTCGCCGTCTTCGT
FLT1|NM_001159920|2216	822	2321	FLT1	NM_001159920	2216	TAGAAGACGCACCGGGCCGGAAGTTGTGTGGTTGAAGTTAATATTCATAGCTTTAACCATACAACTTCCGGCTTTTTTGGCAAGCAAAAGACGGCATACGAGATTGGTGTACGTACACACGTTTCGCCGTCTTCGT
FLT1|NM_001159920|2217	823	2321	FLT1	NM_001159920	2217	TAGAAGACGCACCGGACTCGTGGCTACTTGTTAATTGTTAATATTCATAGCAATTAACGAGTAGCCACGAGTTTTTTTGGCAAGCAAAAGACGGCATACGAGATGTGTGTACGTACACACCATTCGCCGTCTTCGT
FLT1|NM_001159920|2218	824	2321	FLT1	NM_001159920	2218	TAGAAGACGCACCGGTCCATACCCAGGAGTATAAATGTTAATATTCATAGCATTTGTACTCCTGGGTATGGATTTTTTGGCAAGCAAAAGACGGCATACGAGATACGTGTACGTACACACACTTCGCCGTCTTCGT
FLT1|NM_001159920|2219	825	2321	FLT1	NM_001159920	2219	TAGAAGACGCACCGGGGAGTGGACCATCATTTAAATGTTAATATTCATAGCATTTGAATGATGGTCCACTCCTTTTTTGGCAAGCAAAAGACGGCATACGAGATCAGTGTACGTACACACTGTTCGCCGTCTTCGT
SULF1|NM_001128204|2220	826	23213	SULF1	NM_001128204	2220	TAGAAGACGCACCGGCCCAAATATGAACGGGTTAAAGTTAATATTCATAGCTTTGACCCGTTCATATTTGGGTTTTTTGGCAAGCAAAAGACGGCATACGAGATGTGTGTACGTACACTGGTTTCGCCGTCTTCGT
SULF1|NM_001128204|2221	827	23213	SULF1	NM_001128204	2221	TAGAAGACGCACCGGCGTCGAATTTGAGGGTGAGATGTTAATATTCATAGCATTTCACCTTCAAATTCGACGTTTTTTGGCAAGCAAAAGACGGCATACGAGATCAGTGTACGTACACTGCATTCGCCGTCTTCGT
SULF1|NM_001128204|2222	828	23213	SULF1	NM_001128204	2222	TAGAAGACGCACCGGGCGAGAATGGTTTGGATTAATGTTAATATTCATAGCATTAATCCAAGCCATTCTCGCTTTTTTGGCAAGCAAAAGACGGCATACGAGATTGGTGTACGTACACTGACTTCGCCGTCTTCGT
SULF1|NM_001128204|2223	829	23213	SULF1	NM_001128204	2223	TAGAAGACGCACCGGGCCGACTATGGTTACTATATTGTTAATATTCATAGCAATATGGTAACCATGGTCGGCTTTTTTGGCAAGCAAAAGACGGCATACGAGATACGTGTACGTACACTGTGTTCGCCGTCTTCGT
SULF1|NM_001128204|2224	830	23213	SULF1	NM_001128204	2224	TAGAAGACGCACCGGGATCCTTATCAGCTCATAAATGTTAATATTCATAGCATTTGTGAGCTGATAAGGATCTTTTTTGGCAAGCAAAAGACGGCATACGAGATGTGTGTACGTACTGGTGTTTCGCCGTCTTCGT
SULF1|NM_001128204|2225	831	23213	SULF1	NM_001128204	2225	TAGAAGACGCACCGGGTGCTTACCGATGATTAAGATGTTAATATTCATAGCATCTTGATCATCGGTAAGCACTTTTTTGGCAAGCAAAAGACGGCATACGAGATCAGTGTACGTACTGGTCATTCGCCGTCTTCGT
SULF1|NM_001128204|2226	832	23213	SULF1	NM_001128204	2226	TAGAAGACGCACCGGGAGATTGAAGCTCTGTAAGATGTTAATATTCATAGCATCTTGCAGAGCTTCAATCTCTTTTTTGGCAAGCAAAAGACGGCATACGAGATTGGTGTACGTACTGGTACTTCGCCGTCTTCGT
SULF1|NM_001128204|2227	833	23213	SULF1	NM_001128204	2227	TAGAAGACGCACCGGGGCAATGCATTGAGGATATATGTTAATATTCATAGCATGTATCCTCAATGCATTGCCTTTTTTGGCAAGCAAAAGACGGCATACGAGATACGTGTACGTACTGGTTGTTCGCCGTCTTCGT
FLT3|NM_004119|2228	834	2322	FLT3	NM_004119	2228	TAGAAGACGCACCGGGCTAACTTCTACAAACTGATTGTTAATATTCATAGCAATCAGTTTGTAGAAGTTAGCTTTTTTGGCAAGCAAAAGACGGCATACGAGATCAGTGTACGTACTGCAGTTTCGCCGTCTTCGT
FLT3|NM_004119|2229	835	2322	FLT3	NM_004119	2229	TAGAAGACGCACCGGCCACTTTCCAATCACATTCAAGTTAATATTCATAGCTTGGATGTGATTGGAAAGTGGTTTTTTGGCAAGCAAAAGACGGCATACGAGATACGTGTACGTACTGCACATTCGCCGTCTTCGT
FLT3|NM_004119|2230	836	2322	FLT3	NM_004119	2230	TAGAAGACGCACCGGCTGGAATTTAAGTTGTGTGTTGTTAATATTCATAGCAACACACGACTTAAATTCCAGTTTTTTGGCAAGCAAAAGACGGCATACGAGATGTGTGTACGTACTGCAACTTCGCCGTCTTCGT
FLT3|NM_004119|2231	837	2322	FLT3	NM_004119	2231	TAGAAGACGCACCGGCAAGATCTGCTTGTGATTAAGGTTAATATTCATAGCCTTGATCACAGGCAGATCTTGTTTTTTGGCAAGCAAAAGACGGCATACGAGATTGGTGTACGTACTGCATGTTCGCCGTCTTCGT
FLT3|NM_004119|2232	838	2322	FLT3	NM_004119	2232	TAGAAGACGCACCGGGAAGAAGCGATGTATTAGAATGTTAATATTCATAGCATTCTGATACATCGCTTCTTCTTTTTTGGCAAGCAAAAGACGGCATACGAGATACGTGTACGTACTGACGTTTCGCCGTCTTCGT
FLT3|NM_004119|2233	839	2322	FLT3	NM_004119	2233	TAGAAGACGCACCGGGCAATGATATTTGGGACTATTGTTAATATTCATAGCAATAGTCCCAAATATCATTGCTTTTTTGGCAAGCAAAAGACGGCATACGAGATTGGTGTACGTACTGACCATTCGCCGTCTTCGT
FLT3|NM_004119|2234	840	2322	FLT3	NM_004119	2234	TAGAAGACGCACCGGCCTGCTAATTTGTCATAAGTAGTTAATATTCATAGCTACTTGTGACAAATTAGCAGGTTTTTTGGCAAGCAAAAGACGGCATACGAGATCAGTGTACGTACTGACACTTCGCCGTCTTCGT
FLT3|NM_004119|2235	841	2322	FLT3	NM_004119	2235	TAGAAGACGCACCGGCCCTGCTTTACATATTAAGAAGTTAATATTCATAGCTTCTTAATGTGTAAAGCAGGGTTTTTTGGCAAGCAAAAGACGGCATACGAGATGTGTGTACGTACTGACTGTTCGCCGTCTTCGT
PLCB1|NM_015192|2236	842	23236	PLCB1	NM_015192	2236	TAGAAGACGCACCGGCCCATTTGAATTTCGTGGTTTGTTAATATTCATAGCAAGCCACGAGATTCAAATGGGTTTTTTGGCAAGCAAAAGACGGCATACGAGATTGGTGTACGTACTGTGGTTTCGCCGTCTTCGT
PLCB1|NM_015192|2237	843	23236	PLCB1	NM_015192	2237	TAGAAGACGCACCGGCAGCGAGATTCTCGGTTTAATGTTAATATTCATAGCATTAAGCCGAGGATCTCGCTGTTTTTTGGCAAGCAAAAGACGGCATACGAGATGTGTGTACGTACTGTGCATTCGCCGTCTTCGT
PLCB1|NM_015192|2238	844	23236	PLCB1	NM_015192	2238	TAGAAGACGCACCGGTCTAATCTGGTGAACTATATTGTTAATATTCATAGCAATATAGTTCACCAGATTAGATTTTTTGGCAAGCAAAAGACGGCATACGAGATACGTGTACGTACTGTGACTTCGCCGTCTTCGT
PLCB1|NM_015192|2239	845	23236	PLCB1	NM_015192	2239	TAGAAGACGCACCGGGTGGCTAAGGAATGGATAAATGTTAATATTCATAGCATTTGTCCATTCCTTGGCCACTTTTTTGGCAAGCAAAAGACGGCATACGAGATCAGTGTACGTACTGTGTGTTCGCCGTCTTCGT
PLCB1|NM_015192|2240	846	23236	PLCB1	NM_015192	2240	TAGAAGACGCACCGGATACCAGAAGCGAGAATATATGTTAATATTCATAGCATATGTTCTCGCTTCTGGTATTTTTTTGGCAAGCAAAAGACGGCATACGAGATGTGTGTACGTTGGTGTGTTTCGCCGTCTTCGT
PLCB1|NM_015192|2241	847	23236	PLCB1	NM_015192	2241	TAGAAGACGCACCGGGCAGAAGAGTGTCAGAATAATGTTAATATTCATAGCATTGTTCTGACACTCTTCTGCTTTTTTGGCAAGCAAAAGACGGCATACGAGATCAGTGTACGTTGGTGTCATTCGCCGTCTTCGT
PLCB1|NM_015192|2242	848	23236	PLCB1	NM_015192	2242	TAGAAGACGCACCGGGATGGGATAGTGGTAAACATTGTTAATATTCATAGCAGTGTTTGCCACTATCCCATCTTTTTTGGCAAGCAAAAGACGGCATACGAGATTGGTGTACGTTGGTGTACTTCGCCGTCTTCGT
FLT4|NM_002020|2243	849	2324	FLT4	NM_002020	2243	TAGAAGACGCACCGGGAGAGACTTTGAGTAGCTATTGTTAATATTCATAGCAATGGCTGCTCAAAGTCTCTCTTTTTTGGCAAGCAAAAGACGGCATACGAGATACGTGTACGTTGGTGTTGTTCGCCGTCTTCGT
FLT4|NM_002020|2244	850	2324	FLT4	NM_002020	2244	TAGAAGACGCACCGGGATCGTGGGGTTCTGTAAGTAGTTAATATTCATAGCTACTTGCAGAACTCCACGATCTTTTTTGGCAAGCAAAAGACGGCATACGAGATCAGTGTACGTTGGTCAGTTTCGCCGTCTTCGT
FLT4|NM_002020|2245	851	2324	FLT4	NM_002020	2245	TAGAAGACGCACCGGAGCAGATAGAGAGTAGGTATAGTTAATATTCATAGCTATGCCTGCTCTCTATCTGCTTTTTTTGGCAAGCAAAAGACGGCATACGAGATACGTGTACGTTGGTCACATTCGCCGTCTTCGT
FLT4|NM_002020|2246	852	2324	FLT4	NM_002020	2246	TAGAAGACGCACCGGGGACATCCTGTAAGATGTTTGGTTAATATTCATAGCCAAACATCTTGCAGGGTGTCCTTTTTTGGCAAGCAAAAGACGGCATACGAGATGTGTGTACGTTGGTCAACTTCGCCGTCTTCGT
FLT4|NM_002020|2247	853	2324	FLT4	NM_002020	2247	TAGAAGACGCACCGGCACCGTGTGGGTTGAGTTTAGGTTAATATTCATAGCTTAAACTCAGCCCACACGGTGTTTTTTGGCAAGCAAAAGACGGCATACGAGATTGGTGTACGTTGGTCATGTTCGCCGTCTTCGT
FLT4|NM_002020|2248	854	2324	FLT4	NM_002020	2248	TAGAAGACGCACCGGACAACGGTATCCAGTGATTTCGTTAATATTCATAGCGAAATCGCTGGATGCCGTTGTTTTTTTGGCAAGCAAAAGACGGCATACGAGATACGTGTACGTTGGTACGTTTCGCCGTCTTCGT
FLT4|NM_002020|2249	855	2324	FLT4	NM_002020	2249	TAGAAGACGCACCGGAGCAAGTTGGTGATCTAGAATGTTAATATTCATAGCATTCTGGATCACCAGCTTGCTTTTTTTGGCAAGCAAAAGACGGCATACGAGATTGGTGTACGTTGGTACCATTCGCCGTCTTCGT
FLT4|NM_002020|2250	856	2324	FLT4	NM_002020	2250	TAGAAGACGCACCGGGCTACGTCTGTTACTATAAGTGTTAATATTCATAGCACTTGTAGTAGCAGACGTAGCTTTTTTGGCAAGCAAAAGACGGCATACGAGATCAGTGTACGTTGGTACACTTCGCCGTCTTCGT
FMO2|NM_001460|2251	857	2327	FMO2	NM_001460	2251	TAGAAGACGCACCGGCTCTTGTTCAAAGATCCTAAAGTTAATATTCATAGCTTTAGGATCTTTGAACAAGAGTTTTTTGGCAAGCAAAAGACGGCATACGAGATGTGTGTACGTTGGTACTGTTCGCCGTCTTCGT
FMO2|NM_001460|2252	858	2327	FMO2	NM_001460	2252	TAGAAGACGCACCGGCCAGATGTTGCAGACTAATTAGTTAATATTCATAGCTAATTGGTCTGCAACGTCTGGTTTTTTGGCAAGCAAAAGACGGCATACGAGATTGGTGTACGTTGGTTGGTTTCGCCGTCTTCGT
FMO2|NM_001460|2253	859	2327	FMO2	NM_001460	2253	TAGAAGACGCACCGGGCTGTTGAGTTGAGTAAGAATGTTAATATTCATAGCATTCTTACTCAGCTCAACAGCTTTTTTGGCAAGCAAAAGACGGCATACGAGATGTGTGTACGTTGGTTGCATTCGCCGTCTTCGT
FMO2|NM_001460|2254	860	2327	FMO2	NM_001460	2254	TAGAAGACGCACCGGGCCCTTAGAGAGAATTATGATGTTAATATTCATAGCATCATAGTTCTCTCTGAGGGCTTTTTTGGCAAGCAAAAGACGGCATACGAGATACGTGTACGTTGGTTGACTTCGCCGTCTTCGT
FMO2|NM_001460|2255	861	2327	FMO2	NM_001460	2255	TAGAAGACGCACCGGGTGAAAGAGCTCACAGAAATTGTTAATATTCATAGCAGTTTCTGTGAGCTCTTTCACTTTTTTGGCAAGCAAAAGACGGCATACGAGATCAGTGTACGTTGGTTGTGTTCGCCGTCTTCGT
FMO2|NM_001460|2256	862	2327	FMO2	NM_001460	2256	TAGAAGACGCACCGGCAGACGTTGCAGACTAATTATGTTAATATTCATAGCATAATTGGTCTGCAACGTCTGTTTTTTGGCAAGCAAAAGACGGCATACGAGATTGGTGTACGTTGCAGTGTTTCGCCGTCTTCGT
FMO2|NM_001460|2257	863	2327	FMO2	NM_001460	2257	TAGAAGACGCACCGGGAATTGACTTGTTTGGAGAAAGTTAATATTCATAGCTTTCTCCAAACAGGTCAATTCTTTTTTGGCAAGCAAAAGACGGCATACGAGATGTGTGTACGTTGCAGTCATTCGCCGTCTTCGT
FMO2|NM_001460|2258	864	2327	FMO2	NM_001460	2258	TAGAAGACGCACCGGAAACTGGCTGTGAGACTTTATGTTAATATTCATAGCATAGAGTCTCACAGCCAGTTTTTTTTTGGCAAGCAAAAGACGGCATACGAGATACGTGTACGTTGCAGTACTTCGCCGTCTTCGT
ACSL6|NM_001009185|2259	865	23305	ACSL6	NM_001009185	2259	TAGAAGACGCACCGGCCAGGCAAACACACTATTAAAGTTAATATTCATAGCTTTAATGGTGTGTTTGCCTGGTTTTTTGGCAAGCAAAAGACGGCATACGAGATCAGTGTACGTTGCAGTTGTTCGCCGTCTTCGT
ACSL6|NM_001009185|2260	866	23305	ACSL6	NM_001009185	2260	TAGAAGACGCACCGGGCTATCCGCTACATCATTAATGTTAATATTCATAGCATTGATGATGTAGCGGATAGCTTTTTTGGCAAGCAAAAGACGGCATACGAGATGTGTGTACGTTGCACAGTTTCGCCGTCTTCGT
ACSL6|NM_001009185|2261	867	23305	ACSL6	NM_001009185	2261	TAGAAGACGCACCGGGCATGCACTGATTAGTTTATTGTTAATATTCATAGCAATAAACTGATCAGTGCATGCTTTTTTGGCAAGCAAAAGACGGCATACGAGATCAGTGTACGTTGCACACATTCGCCGTCTTCGT
ACSL6|NM_001009185|2262	868	23305	ACSL6	NM_001009185	2262	TAGAAGACGCACCGGGAGGACCAAATGTGTTTAAAGGTTAATATTCATAGCCTTTGAACACATTTGGTCCTCTTTTTTGGCAAGCAAAAGACGGCATACGAGATTGGTGTACGTTGCACAACTTCGCCGTCTTCGT
ACSL6|NM_001009185|2263	869	23305	ACSL6	NM_001009185	2263	TAGAAGACGCACCGGAAACTTGCTTAGGGAGAATATGTTAATATTCATAGCATATTCTCCCTGAGCAAGTTTTTTTTTGGCAAGCAAAAGACGGCATACGAGATACGTGTACGTTGCACATGTTCGCCGTCTTCGT
ACSL6|NM_001009185|2264	870	23305	ACSL6	NM_001009185	2264	TAGAAGACGCACCGGGTTGATGTTGAGGAATTGAACGTTAATATTCATAGCGTTCAGTTCCTCAACATCAACTTTTTTGGCAAGCAAAAGACGGCATACGAGATCAGTGTACGTTGCAACGTTTCGCCGTCTTCGT
ACSL6|NM_001009185|2265	871	23305	ACSL6	NM_001009185	2265	TAGAAGACGCACCGGGCGGATGTGCATATTTCTTATGTTAATATTCATAGCATAGGAAATGTGCACATCCGCTTTTTTGGCAAGCAAAAGACGGCATACGAGATACGTGTACGTTGCAACCATTCGCCGTCTTCGT
ACSL6|NM_001009185|2266	872	23305	ACSL6	NM_001009185	2266	TAGAAGACGCACCGGTCTGAAAGTGATAGAGAAAGTGTTAATATTCATAGCACTTTCTCTGTCACTTTCAGATTTTTTGGCAAGCAAAAGACGGCATACGAGATGTGTGTACGTTGCAACACTTCGCCGTCTTCGT
ICOSLG|NM_015259|2267	873	23308	ICOSLG	NM_015259	2267	TAGAAGACGCACCGGCCCAACGTGTATTGGATTAATGTTAATATTCATAGCATTGATCCAGTACACGTTGGGTTTTTTGGCAAGCAAAAGACGGCATACGAGATTGGTGTACGTTGCAACTGTTCGCCGTCTTCGT
ICOSLG|NM_015259|2268	874	23308	ICOSLG	NM_015259	2268	TAGAAGACGCACCGGGCTGATACTTAGGAGAAGGAGGTTAATATTCATAGCTTCCTTCTCCTGAGTATCAGCTTTTTTGGCAAGCAAAAGACGGCATACGAGATACGTGTACGTTGCATGGTTTCGCCGTCTTCGT
ICOSLG|NM_015259|2269	875	23308	ICOSLG	NM_015259	2269	TAGAAGACGCACCGGAGAGACAAGATCATAGAGAATGTTAATATTCATAGCATTCTCTGTGATCTTGTCTCTTTTTTTGGCAAGCAAAAGACGGCATACGAGATTGGTGTACGTTGCATGCATTCGCCGTCTTCGT
ICOSLG|NM_015259|2270	876	23308	ICOSLG	NM_015259	2270	TAGAAGACGCACCGGCAGCCAGATAGGAAATGATATGTTAATATTCATAGCATGTCATTTCCTGTCTGGCTGTTTTTTGGCAAGCAAAAGACGGCATACGAGATCAGTGTACGTTGCATGACTTCGCCGTCTTCGT
ICOSLG|NM_015259|2271	877	23308	ICOSLG	NM_015259	2271	TAGAAGACGCACCGGTGATACTTAGGAGAAGGAAGTGTTAATATTCATAGCACTTCCTTCTCCTGAGTATCATTTTTTGGCAAGCAAAAGACGGCATACGAGATGTGTGTACGTTGCATGTGTTCGCCGTCTTCGT
ICOSLG|NM_015259|2272	878	23308	ICOSLG	NM_015259	2272	TAGAAGACGCACCGGTACGTATATTGGCAAATCAGTGTTAATATTCATAGCACTGGTTTGCCAATATACGTATTTTTTGGCAAGCAAAAGACGGCATACGAGATACGTGTACGTTGACGTGTTTCGCCGTCTTCGT
ICOSLG|NM_015259|2273	879	23308	ICOSLG	NM_015259	2273	TAGAAGACGCACCGGATTGGCTGCTGTATAGAGAATGTTAATATTCATAGCGTTCTCTATGCAGCAGCCAATTTTTTTGGCAAGCAAAAGACGGCATACGAGATTGGTGTACGTTGACGTCATTCGCCGTCTTCGT
ICOSLG|NM_015259|2274	880	23308	ICOSLG	NM_015259	2274	TAGAAGACGCACCGGGAAATGATATTGGAGAGAGAGGTTAATATTCATAGCCTCTCTCTCCGATGTCATTTCTTTTTTGGCAAGCAAAAGACGGCATACGAGATCAGTGTACGTTGACGTACTTCGCCGTCTTCGT
CUX2|NM_015267|2275	881	23316	CUX2	NM_015267	2275	TAGAAGACGCACCGGGAAACCTTGCTGTAGAGAAATGTTAATATTCATAGCATTTCTCTGCAGCAAGGTTTCTTTTTTGGCAAGCAAAAGACGGCATACGAGATGTGTGTACGTTGACGTTGTTCGCCGTCTTCGT
CUX2|NM_015267|2276	882	23316	CUX2	NM_015267	2276	TAGAAGACGCACCGGGCAGCTGTTGAAACACAATATGTTAATATTCATAGCATGTTGTGTTTCAGCAGCTGCTTTTTTGGCAAGCAAAAGACGGCATACGAGATTGGTGTACGTTGACCAGTTTCGCCGTCTTCGT
CUX2|NM_015267|2277	883	23316	CUX2	NM_015267	2277	TAGAAGACGCACCGGGAGGATCAAGTAGGAATAGATGTTAATATTCATAGCATCTGTTCCTGCTTGATCCTCTTTTTTGGCAAGCAAAAGACGGCATACGAGATGTGTGTACGTTGACCACATTCGCCGTCTTCGT
CUX2|NM_015267|2278	884	23316	CUX2	NM_015267	2278	TAGAAGACGCACCGGGGGCCTTTAAGAAGTATAGATGTTAATATTCATAGCATCTGTACTTCTTGAAGGCCCTTTTTTGGCAAGCAAAAGACGGCATACGAGATACGTGTACGTTGACCAACTTCGCCGTCTTCGT
CUX2|NM_015267|2279	885	23316	CUX2	NM_015267	2279	TAGAAGACGCACCGGACCAACCTGGAGAAAGTTAATGTTAATATTCATAGCATTAGCTTTCTCCAGGTTGGTTTTTTTGGCAAGCAAAAGACGGCATACGAGATCAGTGTACGTTGACCATGTTCGCCGTCTTCGT
CUX2|NM_015267|2280	886	23316	CUX2	NM_015267	2280	TAGAAGACGCACCGGGACTCACTGCTTATTGTAAAGGTTAATATTCATAGCCTTTGCAATAAGCAGTGAGTCTTTTTTGGCAAGCAAAAGACGGCATACGAGATGTGTGTACGTTGACACGTTTCGCCGTCTTCGT
CUX2|NM_015267|2281	887	23316	CUX2	NM_015267	2281	TAGAAGACGCACCGGAGACCAACACCGTTATCAATTGTTAATATTCATAGCAGTTGATGACGGTGTTGGTCTTTTTTTGGCAAGCAAAAGACGGCATACGAGATCAGTGTACGTTGACACCATTCGCCGTCTTCGT
FN1|NM_002026|2282	888	2335	FN1	NM_002026	2282	TAGAAGACGCACCGGCGTGGTTGTATCAGGATTTATGTTAATATTCATAGCATAAGTCCTGATACAACCACGTTTTTTGGCAAGCAAAAGACGGCATACGAGATTGGTGTACGTTGACACACTTCGCCGTCTTCGT
FN1|NM_002026|2283	889	2335	FN1	NM_002026	2283	TAGAAGACGCACCGGCGGTTGTTATGATAATGGAAAGTTAATATTCATAGCTTTCCATTGTCATAACAACCGTTTTTTGGCAAGCAAAAGACGGCATACGAGATACGTGTACGTTGACACTGTTCGCCGTCTTCGT
FN1|NM_002026|2284	890	2335	FN1	NM_002026	2284	TAGAAGACGCACCGGCCCTACACAGTTTCCTATTATGTTAATATTCATAGCATAATGGGAAACTGTGTAGGGTTTTTTGGCAAGCAAAAGACGGCATACGAGATCAGTGTACGTTGACTGGTTTCGCCGTCTTCGT
FN1|NM_002026|2285	891	2335	FN1	NM_002026	2285	TAGAAGACGCACCGGGCCTGTTCTAAGAATTGGTTTGTTAATATTCATAGCAAACCAATTCTTGGAGCAGGCTTTTTTGGCAAGCAAAAGACGGCATACGAGATACGTGTACGTTGACTGCATTCGCCGTCTTCGT
FN1|NM_002026|2286	892	2335	FN1	NM_002026	2286	TAGAAGACGCACCGGTGGAACTGGGAACTGAATATAGTTAATATTCATAGCTATATTCGGTTCCCGGTTCCATTTTTTGGCAAGCAAAAGACGGCATACGAGATGTGTGTACGTTGACTGACTTCGCCGTCTTCGT
FN1|NM_002026|2287	893	2335	FN1	NM_002026	2287	TAGAAGACGCACCGGGCCGAATGTGGGTGAGGAGATGTTAATATTCATAGCATTTCCTCACCTACATTCGGCTTTTTTGGCAAGCAAAAGACGGCATACGAGATTGGTGTACGTTGACTGTGTTCGCCGTCTTCGT
FN1|NM_002026|2288	894	2335	FN1	NM_002026	2288	TAGAAGACGCACCGGGACTTATGGTGGTCACTAAATGTTAATATTCATAGCATTTGGTGGCCACCATAAGTCTTTTTTGGCAAGCAAAAGACGGCATACGAGATCAGTGTACGTTGTGGTGTTTCGCCGTCTTCGT
FN1|NM_002026|2289	895	2335	FN1	NM_002026	2289	TAGAAGACGCACCGGGGCACATGTTGAACTGTATATGTTAATATTCATAGCATGTACAGTTCAGCATGTGCCTTTTTTGGCAAGCAAAAGACGGCATACGAGATACGTGTACGTTGTGGTCATTCGCCGTCTTCGT
ARHGEF12|NM_001198665|2290	896	23365	ARHGEF12	NM_001198665	2290	TAGAAGACGCACCGGCGTCGTATCTTCTTTGAGTTTGTTAATATTCATAGCAAACTCAAGGAAGATGCGACGTTTTTTGGCAAGCAAAAGACGGCATACGAGATGTGTGTACGTTGTGGTACTTCGCCGTCTTCGT
ARHGEF12|NM_001198665|2291	897	23365	ARHGEF12	NM_001198665	2291	TAGAAGACGCACCGGCCACTCAAATGCAAAGGTTTAGTTAATATTCATAGCTAAGCCTTTGCATTTGAGTGGTTTTTTGGCAAGCAAAAGACGGCATACGAGATTGGTGTACGTTGTGGTTGTTCGCCGTCTTCGT
ARHGEF12|NM_001198665|2292	898	23365	ARHGEF12	NM_001198665	2292	TAGAAGACGCACCGGGCGTTGTGTAATCATCTAGAAGTTAATATTCATAGCTTCTGGATGATTACGCAACGCTTTTTTGGCAAGCAAAAGACGGCATACGAGATACGTGTACGTTGTGCAGTTTCGCCGTCTTCGT
ARHGEF12|NM_001198665|2293	899	23365	ARHGEF12	NM_001198665	2293	TAGAAGACGCACCGGCCAGAAGTTCAAAGGCATTTAGTTAATATTCATAGCTAAGTGCCTTTGAACTTCTGGTTTTTTGGCAAGCAAAAGACGGCATACGAGATTGGTGTACGTTGTGCACATTCGCCGTCTTCGT
ARHGEF12|NM_001198665|2294	900	23365	ARHGEF12	NM_001198665	2294	TAGAAGACGCACCGGGCGAGTATCTAGAGAAGGAGTGTTAATATTCATAGCATTCCTTCTCTGGATACTCGCTTTTTTGGCAAGCAAAAGACGGCATACGAGATCAGTGTACGTTGTGCAACTTCGCCGTCTTCGT
ARHGEF12|NM_001198665|2295	901	23365	ARHGEF12	NM_001198665	2295	TAGAAGACGCACCGGGAAGCATATAGTGATGAGAATGTTAATATTCATAGCATTCTCATCACTATGTGCTTCTTTTTTGGCAAGCAAAAGACGGCATACGAGATGTGTGTACGTTGTGCATGTTCGCCGTCTTCGT
ARHGEF12|NM_001198665|2296	902	23365	ARHGEF12	NM_001198665	2296	TAGAAGACGCACCGGGTAGAAAGGGTGACTGAATATGTTAATATTCATAGCATGTTCAGTCACCCTTTCTACTTTTTTGGCAAGCAAAAGACGGCATACGAGATTGGTGTACGTTGTGACGTTTCGCCGTCTTCGT
ARHGEF12|NM_001198665|2297	903	23365	ARHGEF12	NM_001198665	2297	TAGAAGACGCACCGGGGAACTGGTGATATTGCAATTGTTAATATTCATAGCAGTTGCAATGTCACCAGTTCCTTTTTTGGCAAGCAAAAGACGGCATACGAGATGTGTGTACGTTGTGACCATTCGCCGTCTTCGT
PPP1R13B|NM_015316|2298	904	23368	PPP1R13B	NM_015316	2298	TAGAAGACGCACCGGGCCTCAACTATAAGCGATATTGTTAATATTCATAGCAATGTCGCTTATGGTTGAGGCTTTTTTGGCAAGCAAAAGACGGCATACGAGATACGTGTACGTTGTGACACTTCGCCGTCTTCGT
PPP1R13B|NM_015316|2299	905	23368	PPP1R13B	NM_015316	2299	TAGAAGACGCACCGGCCTGTTGAGATGTTGTAGAATGTTAATATTCATAGCATTCTACAACATCTCGACAGGTTTTTTGGCAAGCAAAAGACGGCATACGAGATCAGTGTACGTTGTGACTGTTCGCCGTCTTCGT
PPP1R13B|NM_015316|2300	906	23368	PPP1R13B	NM_015316	2300	TAGAAGACGCACCGGGTCTCTCAGTATTGCCTTAAAGTTAATATTCATAGCTTTGAGGCAATACTGAGAGACTTTTTTGGCAAGCAAAAGACGGCATACGAGATGTGTGTACGTTGTGTGGTTTCGCCGTCTTCGT
PPP1R13B|NM_015316|2301	907	23368	PPP1R13B	NM_015316	2301	TAGAAGACGCACCGGCGGCAATTTGTCTGTTGAAATGTTAATATTCATAGCATTTCAGCAGACAGATTGCCGTTTTTTGGCAAGCAAAAGACGGCATACGAGATCAGTGTACGTTGTGTGCATTCGCCGTCTTCGT
PPP1R13B|NM_015316|2302	908	23368	PPP1R13B	NM_015316	2302	TAGAAGACGCACCGGCAGCAGAAGGAATTCTTAAATGTTAATATTCATAGCATTTAAGAGTTCCTTCTGCTGTTTTTTGGCAAGCAAAAGACGGCATACGAGATTGGTGTACGTTGTGTGACTTCGCCGTCTTCGT
PPP1R13B|NM_015316|2303	909	23368	PPP1R13B	NM_015316	2303	TAGAAGACGCACCGGTGATCAGCTTAGTCAGTAATTGTTAATATTCATAGCAATTGCTGACTAAGCTGATCATTTTTTGGCAAGCAAAAGACGGCATACGAGATACGTGTACGTTGTGTGTGTTCGCCGTCTTCGT
PPP1R13B|NM_015316|2304	910	23368	PPP1R13B	NM_015316	2304	TAGAAGACGCACCGGGCACATAGCGCTTTAAATAAGGTTAATATTCATAGCCTTATTTAAGGCGCTGTGTGCTTTTTTGGCAAGCAAAAGACGGCATACGAGATTGGTGTACCAGTGTGTGTTTCGCCGTCTTCGT
PPP1R13B|NM_015316|2305	911	23368	PPP1R13B	NM_015316	2305	TAGAAGACGCACCGGACTACAGATTCGTAACTAACTGTTAATATTCATAGCAGTTGGTTACGAATCTGTAGTTTTTTTGGCAAGCAAAAGACGGCATACGAGATGTGTGTACCAGTGTGTCATTCGCCGTCTTCGT
SIRT5|NM_001193267|2306	912	23408	SIRT5	NM_001193267	2306	TAGAAGACGCACCGGCCAGTTATATTGTGGCTTGAAGTTAATATTCATAGCTTCAGGCCACAATATAGCTGGTTTTTTGGCAAGCAAAAGACGGCATACGAGATACGTGTACCAGTGTGTACTTCGCCGTCTTCGT
SIRT5|NM_001193267|2307	913	23408	SIRT5	NM_001193267	2307	TAGAAGACGCACCGGGAGTCCAATTTGTCTAGCTTTGTTAATATTCATAGCAAAGCTGGACAAATTGGACTCTTTTTTGGCAAGCAAAAGACGGCATACGAGATCAGTGTACCAGTGTGTTGTTCGCCGTCTTCGT
SIRT5|NM_001193267|2308	914	23408	SIRT5	NM_001193267	2308	TAGAAGACGCACCGGCGTCCACATGAAACTAGATTTGTTAATATTCATAGCAAATCTGGTTTCGTGTGGACGTTTTTTGGCAAGCAAAAGACGGCATACGAGATGTGTGTACCAGTGTCAGTTTCGCCGTCTTCGT
SIRT5|NM_001193267|2309	915	23408	SIRT5	NM_001193267	2309	TAGAAGACGCACCGGGAGCTGGTGTTAGTGTAGAAGGTTAATATTCATAGCTTTCTGCACTAACACCAGCTCTTTTTTGGCAAGCAAAAGACGGCATACGAGATCAGTGTACCAGTGTCACATTCGCCGTCTTCGT
SIRT5|NM_001193267|2310	916	23408	SIRT5	NM_001193267	2310	TAGAAGACGCACCGGGATTGATTTCCCAGCTATATTGTTAATATTCATAGCAATATAGCTGGGAAATCAATCTTTTTTGGCAAGCAAAAGACGGCATACGAGATTGGTGTACCAGTGTCAACTTCGCCGTCTTCGT
SIRT5|NM_001193267|2311	917	23408	SIRT5	NM_001193267	2311	TAGAAGACGCACCGGGCGTGCTAGTGGTTGAATTTAGTTAATATTCATAGCTAAATTCAGCCACTGGCACGCTTTTTTGGCAAGCAAAAGACGGCATACGAGATACGTGTACCAGTGTCATGTTCGCCGTCTTCGT
SIRT5|NM_001193267|2312	918	23408	SIRT5	NM_001193267	2312	TAGAAGACGCACCGGGCTGGTGTTAGTGTAGAAGGTGTTAATATTCATAGCACTTTCTGCACTAACACCAGCTTTTTTGGCAAGCAAAAGACGGCATACGAGATCAGTGTACCAGTGTACGTTTCGCCGTCTTCGT
SIRT5|NM_001193267|2313	919	23408	SIRT5	NM_001193267	2313	TAGAAGACGCACCGGGATCTCCATCTCATCTTTAATGTTAATATTCATAGCATTAGAGATGAGATGGAGATCTTTTTTGGCAAGCAAAAGACGGCATACGAGATACGTGTACCAGTGTACCATTCGCCGTCTTCGT
FNTB|NM_002028|2314	920	2342	FNTB	NM_002028	2314	TAGAAGACGCACCGGGCACTGTTGAATGGATAGTAAGTTAATATTCATAGCTTGCTATCCATTCAGCAGTGCTTTTTTGGCAAGCAAAAGACGGCATACGAGATGTGTGTACCAGTGTACACTTCGCCGTCTTCGT
FNTB|NM_002028|2315	921	2342	FNTB	NM_002028	2315	TAGAAGACGCACCGGCGACAACTGATAGATGCTTATGTTAATATTCATAGCATAGGCATCTGTCAGTTGTCGTTTTTTGGCAAGCAAAAGACGGCATACGAGATTGGTGTACCAGTGTACTGTTCGCCGTCTTCGT
FNTB|NM_002028|2316	922	2342	FNTB	NM_002028	2316	TAGAAGACGCACCGGGCTTATTACAATGGGTGATAAGTTAATATTCATAGCTTGTCACCCATTGTAATAAGCTTTTTTGGCAAGCAAAAGACGGCATACGAGATACGTGTACCAGTGTTGGTTTCGCCGTCTTCGT
FNTB|NM_002028|2317	923	2342	FNTB	NM_002028	2317	TAGAAGACGCACCGGCACTACATACTTTCTACAGAAGTTAATATTCATAGCTTCTGTAGAAAGTATGTAGTGTTTTTTGGCAAGCAAAAGACGGCATACGAGATTGGTGTACCAGTGTTGCATTCGCCGTCTTCGT
FNTB|NM_002028|2318	924	2342	FNTB	NM_002028	2318	TAGAAGACGCACCGGCCCACATATGTAGCAGTTAATGTTAATATTCATAGCATTGACTGCTGCATATGTGGGTTTTTTGGCAAGCAAAAGACGGCATACGAGATCAGTGTACCAGTGTTGACTTCGCCGTCTTCGT
FNTB|NM_002028|2319	925	2342	FNTB	NM_002028	2319	TAGAAGACGCACCGGGAGGCCTATGACATTATTAACGTTAATATTCATAGCGTTAATGATGTCATAGGCCTCTTTTTTGGCAAGCAAAAGACGGCATACGAGATGTGTGTACCAGTGTTGTGTTCGCCGTCTTCGT
FNTB|NM_002028|2320	926	2342	FNTB	NM_002028	2320	TAGAAGACGCACCGGGATGTGATTTGAAGGAGGATTGTTAATATTCATAGCAATCCTCCTTCAAATCGCATCTTTTTTGGCAAGCAAAAGACGGCATACGAGATACGTGTACCAGTCAGTGTTTCGCCGTCTTCGT
FNTB|NM_002028|2321	927	2342	FNTB	NM_002028	2321	TAGAAGACGCACCGGGAAACAGTCACGTCTATAGAAGTTAATATTCATAGCTTCTATGGACGTGACTGTTTCTTTTTTGGCAAGCAAAAGACGGCATACGAGATTGGTGTACCAGTCAGTCATTCGCCGTCTTCGT
HARS2|NM_012208|2322	928	23438	HARS2	NM_012208	2322	TAGAAGACGCACCGGGCTATTTGAATACCTGACTTTGTTAATATTCATAGCAAAGTCAGGTATTCAAATAGCTTTTTTGGCAAGCAAAAGACGGCATACGAGATCAGTGTACCAGTCAGTACTTCGCCGTCTTCGT
HARS2|NM_012208|2323	929	23438	HARS2	NM_012208	2323	TAGAAGACGCACCGGGCACATCAAGAGAAACTAAATGTTAATATTCATAGCATTTGGTTTCTCTTGATGTGCTTTTTTGGCAAGCAAAAGACGGCATACGAGATGTGTGTACCAGTCAGTTGTTCGCCGTCTTCGT
HARS2|NM_012208|2324	930	23438	HARS2	NM_012208	2324	TAGAAGACGCACCGGGCTTGGAAAGATGTGAGATATGTTAATATTCATAGCATGTCTCACATCTTTCCAAGCTTTTTTGGCAAGCAAAAGACGGCATACGAGATTGGTGTACCAGTCACAGTTTCGCCGTCTTCGT
HARS2|NM_012208|2325	931	23438	HARS2	NM_012208	2325	TAGAAGACGCACCGGGCTCGTTATTTGGCTATGAATGTTAATATTCATAGCATTCATGGCCAGATAACGAGCTTTTTTGGCAAGCAAAAGACGGCATACGAGATGTGTGTACCAGTCACACATTCGCCGTCTTCGT
HARS2|NM_012208|2326	932	23438	HARS2	NM_012208	2326	TAGAAGACGCACCGGGTGGTCATTATTGGTGAGTAAGTTAATATTCATAGCTTGCTCACCAATAATGACCACTTTTTTGGCAAGCAAAAGACGGCATACGAGATACGTGTACCAGTCACAACTTCGCCGTCTTCGT
HARS2|NM_012208|2327	933	23438	HARS2	NM_012208	2327	TAGAAGACGCACCGGACTATACAGGAGTGATTTATGGTTAATATTCATAGCCATAGATCACTCCTGTATAGTTTTTTTGGCAAGCAAAAGACGGCATACGAGATCAGTGTACCAGTCACATGTTCGCCGTCTTCGT
HARS2|NM_012208|2328	934	23438	HARS2	NM_012208	2328	TAGAAGACGCACCGGCCATAGTCTAAGGCTGTTATAGTTAATATTCATAGCTATAACGGCCTTGGACTATGGTTTTTTGGCAAGCAAAAGACGGCATACGAGATGTGTGTACCAGTCAACGTTTCGCCGTCTTCGT
HARS2|NM_012208|2329	935	23438	HARS2	NM_012208	2329	TAGAAGACGCACCGGGCATTCCATTGGTGGTTATTAGTTAATATTCATAGCTAATGACCACCAGTGGAATGCTTTTTTGGCAAGCAAAAGACGGCATACGAGATCAGTGTACCAGTCAACCATTCGCCGTCTTCGT
BRD4|NM_014299|2330	936	23476	BRD4	NM_014299	2330	TAGAAGACGCACCGGCCTGGAGATGATATAGTCTTAGTTAATATTCATAGCTAAGACTATGTCATCTCCAGGTTTTTTGGCAAGCAAAAGACGGCATACGAGATTGGTGTACCAGTCAACACTTCGCCGTCTTCGT
BRD4|NM_014299|2331	937	23476	BRD4	NM_014299	2331	TAGAAGACGCACCGGCCAGAGTGATCTATTGTTAATGTTAATATTCATAGCATTGACAATAGATCACTCTGGTTTTTTGGCAAGCAAAAGACGGCATACGAGATACGTGTACCAGTCAACTGTTCGCCGTCTTCGT
BRD4|NM_014299|2332	938	23476	BRD4	NM_014299	2332	TAGAAGACGCACCGGCCTATGGATATGGGAATAATAGTTAATATTCATAGCTATTGTTCCCATATCCATAGGTTTTTTGGCAAGCAAAAGACGGCATACGAGATCAGTGTACCAGTCATGGTTTCGCCGTCTTCGT
BRD4|NM_014299|2333	939	23476	BRD4	NM_014299	2333	TAGAAGACGCACCGGCAGTGATAGTTCGATTGATGAGTTAATATTCATAGCTCATCAGTCGAACTGTCACTGTTTTTTGGCAAGCAAAAGACGGCATACGAGATACGTGTACCAGTCATGCATTCGCCGTCTTCGT
BRD4|NM_014299|2334	940	23476	BRD4	NM_014299	2334	TAGAAGACGCACCGGGCCTATGTCTTATGAGGAGAGGTTAATATTCATAGCTTCTCCTCATAGGACATAGGCTTTTTTGGCAAGCAAAAGACGGCATACGAGATGTGTGTACCAGTCATGACTTCGCCGTCTTCGT
BRD4|NM_014299|2335	941	23476	BRD4	NM_014299	2335	TAGAAGACGCACCGGGCTCTAGGATGTGTTTGAAATGTTAATATTCATAGCATTTCGAACACATCCTGGAGCTTTTTTGGCAAGCAAAAGACGGCATACGAGATTGGTGTACCAGTCATGTGTTCGCCGTCTTCGT
BRD4|NM_014299|2336	942	23476	BRD4	NM_014299	2336	TAGAAGACGCACCGGGCAGCTACCATTGATATGAATGTTAATATTCATAGCATTCATGTCAATGGTAGCTGCTTTTTTGGCAAGCAAAAGACGGCATACGAGATCAGTGTACCAGTACGTGTTTCGCCGTCTTCGT
BRD4|NM_014299|2337	943	23476	BRD4	NM_014299	2337	TAGAAGACGCACCGGCCTGGGATGAGATTGAGAAGTGTTAATATTCATAGCATTTCTCAATCTCGTCCCAGGTTTTTTGGCAAGCAAAAGACGGCATACGAGATACGTGTACCAGTACGTCATTCGCCGTCTTCGT
TNFRSF13B|NM_012452|2338	944	23495	TNFRSF13B	NM_012452	2338	TAGAAGACGCACCGGCCCGTTAAAGTCCGGCTAAGTGTTAATATTCATAGCACTTGGCCGGACTTTGACGGGTTTTTTGGCAAGCAAAAGACGGCATACGAGATGTGTGTACCAGTACGTACTTCGCCGTCTTCGT
TNFRSF13B|NM_012452|2339	945	23495	TNFRSF13B	NM_012452	2339	TAGAAGACGCACCGGAGGAGTAAGGTAAGTTCTATGGTTAATATTCATAGCCATAGAACTTGCCTTGCTCCTTTTTTTGGCAAGCAAAAGACGGCATACGAGATTGGTGTACCAGTACGTTGTTCGCCGTCTTCGT
TNFRSF13B|NM_012452|2340	946	23495	TNFRSF13B	NM_012452	2340	TAGAAGACGCACCGGCACCCTAAGTAATGTGCATATGTTAATATTCATAGCGTATGCACATTGCTTAGGGTGTTTTTTGGCAAGCAAAAGACGGCATACGAGATACGTGTACCAGTACCAGTTTCGCCGTCTTCGT
TNFRSF13B|NM_012452|2341	947	23495	TNFRSF13B	NM_012452	2341	TAGAAGACGCACCGGAGCGGAGTGGAGGAGTTGGAAGTTAATATTCATAGCTTTCAACTTCTCCACTCCGCTTTTTTTGGCAAGCAAAAGACGGCATACGAGATTGGTGTACCAGTACCACATTCGCCGTCTTCGT
TNFRSF13B|NM_012452|2342	948	23495	TNFRSF13B	NM_012452	2342	TAGAAGACGCACCGGGCATACTTCTGTGAGAATAAGGTTAATATTCATAGCCTTGTTCTCACAGAAGTATGCTTTTTTGGCAAGCAAAAGACGGCATACGAGATCAGTGTACCAGTACCAACTTCGCCGTCTTCGT
TNFRSF13B|NM_012452|2343	949	23495	TNFRSF13B	NM_012452	2343	TAGAAGACGCACCGGTGTGCATACTTCTGTGAGAATGTTAATATTCATAGCGTTCTCACAGAAGTATGCACATTTTTTGGCAAGCAAAAGACGGCATACGAGATGTGTGTACCAGTACCATGTTCGCCGTCTTCGT
TNFRSF13B|NM_012452|2344	950	23495	TNFRSF13B	NM_012452	2344	TAGAAGACGCACCGGAAGGAGCAAGGTAAGTTCTATGTTAATATTCATAGCATAGAACTTGCCTTGCTCCTTTTTTTTGGCAAGCAAAAGACGGCATACGAGATTGGTGTACCAGTACACGTTTCGCCGTCTTCGT
TNFRSF13B|NM_012452|2345	951	23495	TNFRSF13B	NM_012452	2345	TAGAAGACGCACCGGCATACTTCTGTGAGAATAAGCGTTAATATTCATAGCGCTTGTTCTCACAGAAGTATGTTTTTTGGCAAGCAAAAGACGGCATACGAGATGTGTGTACCAGTACACCATTCGCCGTCTTCGT
FOLR2|NM_000803|2346	952	2350	FOLR2	NM_000803	2346	TAGAAGACGCACCGGCCTCTGGAGTCATTCATATAAGTTAATATTCATAGCTTGTATGAGTGACTCCAGAGGTTTTTTGGCAAGCAAAAGACGGCATACGAGATACGTGTACCAGTACACACTTCGCCGTCTTCGT
FOLR2|NM_000803|2347	953	2350	FOLR2	NM_000803	2347	TAGAAGACGCACCGGCTGGACCTTAGGAGTTAATAAGTTAATATTCATAGCTTGTTAACTCCTGAGGTCCAGTTTTTTGGCAAGCAAAAGACGGCATACGAGATCAGTGTACCAGTACACTGTTCGCCGTCTTCGT
FOLR2|NM_000803|2348	954	2350	FOLR2	NM_000803	2348	TAGAAGACGCACCGGTGCAGTCCTTGGAAGAAGAGTGTTAATATTCATAGCATTCTTCTTCCAGGGACTGCATTTTTTGGCAAGCAAAAGACGGCATACGAGATGTGTGTACCAGTACTGGTTTCGCCGTCTTCGT
FOLR2|NM_000803|2349	955	2350	FOLR2	NM_000803	2349	TAGAAGACGCACCGGGCATCTAGATGTGGTTTGATTGTTAATATTCATAGCAATCAAACCACATCTGGATGCTTTTTTGGCAAGCAAAAGACGGCATACGAGATCAGTGTACCAGTACTGCATTCGCCGTCTTCGT
FOLR2|NM_000803|2350	956	2350	FOLR2	NM_000803	2350	TAGAAGACGCACCGGGGACCTTAGGAGTTAATAAGTGTTAATATTCATAGCACTTGTTAACTCCTGAGGTCCTTTTTTGGCAAGCAAAAGACGGCATACGAGATTGGTGTACCAGTACTGACTTCGCCGTCTTCGT
FOLR2|NM_000803|2351	957	2350	FOLR2	NM_000803	2351	TAGAAGACGCACCGGACTCATACAAGGTCAGTAACTGTTAATATTCATAGCAGTTGCTGACCTTGTATGAGTTTTTTTGGCAAGCAAAAGACGGCATACGAGATACGTGTACCAGTACTGTGTTCGCCGTCTTCGT
FOLR2|NM_000803|2352	958	2350	FOLR2	NM_000803	2352	TAGAAGACGCACCGGAGGACACTTGTCTTTATGAGTGTTAATATTCATAGCACTCATAGAGACAGGTGTCCTTTTTTTGGCAAGCAAAAGACGGCATACGAGATGTGTGTACCAGTTGGTGTTTCGCCGTCTTCGT
FOLR2|NM_000803|2353	959	2350	FOLR2	NM_000803	2353	TAGAAGACGCACCGGAATCAGAGTTGGCGTAAAGAAGTTAATATTCATAGCTTCTTTGCGCCAGCTCTGATTTTTTTTGGCAAGCAAAAGACGGCATACGAGATCAGTGTACCAGTTGGTCATTCGCCGTCTTCGT
POFUT1|NM_015352|2354	960	23509	POFUT1	NM_015352	2354	TAGAAGACGCACCGGCGGTCTATGTTGCTATTGATTGTTAATATTCATAGCAATCAGTAGCAACGTAGACCGTTTTTTGGCAAGCAAAAGACGGCATACGAGATTGGTGTACCAGTTGGTACTTCGCCGTCTTCGT
POFUT1|NM_015352|2355	961	23509	POFUT1	NM_015352	2355	TAGAAGACGCACCGGCGGCCTTATGTGGGCATTTATGTTAATATTCATAGCATGAATGCCCACATAGGGCCGTTTTTTGGCAAGCAAAAGACGGCATACGAGATACGTGTACCAGTTGGTTGTTCGCCGTCTTCGT
POFUT1|NM_015352|2356	962	23509	POFUT1	NM_015352	2356	TAGAAGACGCACCGGGCTACTGATTCTGAGAGTTATGTTAATATTCATAGCATAACTCTCGGAATCAGTAGCTTTTTTGGCAAGCAAAAGACGGCATACGAGATCAGTGTACCAGTTGCAGTTTCGCCGTCTTCGT
POFUT1|NM_015352|2357	963	23509	POFUT1	NM_015352	2357	TAGAAGACGCACCGGGGCCAAGTCGACTACTTTATTGTTAATATTCATAGCAATAAAGTGGTCGGCTTGGCCTTTTTTGGCAAGCAAAAGACGGCATACGAGATACGTGTACCAGTTGCACATTCGCCGTCTTCGT
POFUT1|NM_015352|2358	964	23509	POFUT1	NM_015352	2358	TAGAAGACGCACCGGATGGTATGGTCAGATGAAATGGTTAATATTCATAGCCATTTCGTCTGACCATACCATTTTTTTGGCAAGCAAAAGACGGCATACGAGATGTGTGTACCAGTTGCAACTTCGCCGTCTTCGT
POFUT1|NM_015352|2359	965	23509	POFUT1	NM_015352	2359	TAGAAGACGCACCGGGCATTTGCAAAGCTGTTAAACGTTAATATTCATAGCGTTTAGCAGCTTTGCAAATGCTTTTTTGGCAAGCAAAAGACGGCATACGAGATTGGTGTACCAGTTGCATGTTCGCCGTCTTCGT
POFUT1|NM_015352|2360	966	23509	POFUT1	NM_015352	2360	TAGAAGACGCACCGGGAGCTCCAATAGCTCTTTAAAGTTAATATTCATAGCTTTGAAGAGCTGTTGGAGCTCTTTTTTGGCAAGCAAAAGACGGCATACGAGATACGTGTACCAGTTGACGTTTCGCCGTCTTCGT
POFUT1|NM_015352|2361	967	23509	POFUT1	NM_015352	2361	TAGAAGACGCACCGGATTGGCTCTGATTGGAAGAATGTTAATATTCATAGCGTTCTTCCAGTCAGAGCCAATTTTTTTGGCAAGCAAAAGACGGCATACGAGATTGGTGTACCAGTTGACCATTCGCCGTCTTCGT
SRRM2|NM_016333|2362	968	23524	SRRM2	NM_016333	2362	TAGAAGACGCACCGGCGCCACCTAAACAGAAATTTAGTTAATATTCATAGCTAGATTTCTGTTTAGGTGGCGTTTTTTGGCAAGCAAAAGACGGCATACGAGATCAGTGTACCAGTTGACACTTCGCCGTCTTCGT
SRRM2|NM_016333|2363	969	23524	SRRM2	NM_016333	2363	TAGAAGACGCACCGGCCGTTTCTTAATCAGTTGGAAGTTAATATTCATAGCTTCCAGCTGATTAAGAAACGGTTTTTTGGCAAGCAAAAGACGGCATACGAGATGTGTGTACCAGTTGACTGTTCGCCGTCTTCGT
SRRM2|NM_016333|2364	970	23524	SRRM2	NM_016333	2364	TAGAAGACGCACCGGGCTGTGTCTTTGATTCTTGATGTTAATATTCATAGCATCAAGAGTCAAAGACACAGCTTTTTTGGCAAGCAAAAGACGGCATACGAGATTGGTGTACCAGTTGTGGTTTCGCCGTCTTCGT
SRRM2|NM_016333|2365	971	23524	SRRM2	NM_016333	2365	TAGAAGACGCACCGGCCCAACCTAAAGCTAAATTTAGTTAATATTCATAGCTAGATTTAGCTTTAGGTTGGGTTTTTTGGCAAGCAAAAGACGGCATACGAGATGTGTGTACCAGTTGTGCATTCGCCGTCTTCGT
SRRM2|NM_016333|2366	972	23524	SRRM2	NM_016333	2366	TAGAAGACGCACCGGTATCCTACAGTGGACTTGAATGTTAATATTCATAGCATTCGAGTCCACTGTAGGATATTTTTTGGCAAGCAAAAGACGGCATACGAGATACGTGTACCAGTTGTGACTTCGCCGTCTTCGT
SRRM2|NM_016333|2367	973	23524	SRRM2	NM_016333	2367	TAGAAGACGCACCGGGTCCAATTCAAGCCTAGAAATGTTAATATTCATAGCATTTCTGGGCTTGAATTGGACTTTTTTGGCAAGCAAAAGACGGCATACGAGATCAGTGTACCAGTTGTGTGTTCGCCGTCTTCGT
SRRM2|NM_016333|2368	974	23524	SRRM2	NM_016333	2368	TAGAAGACGCACCGGTCCTCTGTTGGTGATCATAATGTTAATATTCATAGCATTGTGATCACCAGCAGAGGATTTTTTGGCAAGCAAAAGACGGCATACGAGATACGTGTACCACAGTGTGTTTCGCCGTCTTCGT
HMHA1|NM_001258328|2369	975	23526	HMHA1	NM_001258328	2369	TAGAAGACGCACCGGCTTCCATTATGAGAGTAACAAGTTAATATTCATAGCTTGTTGCTCTCATAATGGAAGTTTTTTGGCAAGCAAAAGACGGCATACGAGATTGGTGTACCACAGTGTCATTCGCCGTCTTCGT
HMHA1|NM_001258328|2370	976	23526	HMHA1	NM_001258328	2370	TAGAAGACGCACCGGGACACCAGGTTTACAAGTTATGTTAATATTCATAGCATGACTTGTGAACCTGGTGTCTTTTTTGGCAAGCAAAAGACGGCATACGAGATCAGTGTACCACAGTGTACTTCGCCGTCTTCGT
HMHA1|NM_001258328|2371	977	23526	HMHA1	NM_001258328	2371	TAGAAGACGCACCGGACTGCTGTATGCCAAGAATATGTTAATATTCATAGCATGTTCTTGGCATACAGCAGTTTTTTTGGCAAGCAAAAGACGGCATACGAGATGTGTGTACCACAGTGTTGTTCGCCGTCTTCGT
HMHA1|NM_001258328|2372	978	23526	HMHA1	NM_001258328	2372	TAGAAGACGCACCGGGCAACAATGATCTGGAGAAATGTTAATATTCATAGCGTTTCTCCAGATCATTGTTGCTTTTTTGGCAAGCAAAAGACGGCATACGAGATTGGTGTACCACAGTCAGTTTCGCCGTCTTCGT
HMHA1|NM_001258328|2373	979	23526	HMHA1	NM_001258328	2373	TAGAAGACGCACCGGAGAGCGACTAAACCATTAAGTGTTAATATTCATAGCACTTGATGGTTTGGTCGCTCTTTTTTTGGCAAGCAAAAGACGGCATACGAGATGTGTGTACCACAGTCACATTCGCCGTCTTCGT
HMHA1|NM_001258328|2374	980	23526	HMHA1	NM_001258328	2374	TAGAAGACGCACCGGGAGGGCTTTGAGAAATTTAAGGTTAATATTCATAGCCTTAAGTTTCTCAAGGCCCTCTTTTTTGGCAAGCAAAAGACGGCATACGAGATACGTGTACCACAGTCAACTTCGCCGTCTTCGT
HMHA1|NM_001258328|2375	981	23526	HMHA1	NM_001258328	2375	TAGAAGACGCACCGGTGCCCTTTATCGTTAAGAAGTGTTAATATTCATAGCACTTCTTGACGATGAAGGGCATTTTTTGGCAAGCAAAAGACGGCATACGAGATCAGTGTACCACAGTCATGTTCGCCGTCTTCGT
HMHA1|NM_001258328|2376	982	23526	HMHA1	NM_001258328	2376	TAGAAGACGCACCGGTGCAGAAGATCGTTCACAATTGTTAATATTCATAGCAGTTGTGAGCGATCTTCTGCATTTTTTGGCAAGCAAAAGACGGCATACGAGATGTGTGTACCACAGTACGTTTCGCCGTCTTCGT
FOS|NM_005252|2377	983	2353	FOS	NM_005252	2377	TAGAAGACGCACCGGGCGGAGATAGACCAATTAGAAGTTAATATTCATAGCTTCTAGTTGGTCTGTCTCCGCTTTTTTGGCAAGCAAAAGACGGCATACGAGATCAGTGTACCACAGTACCATTCGCCGTCTTCGT
FOS|NM_005252|2378	984	2353	FOS	NM_005252	2378	TAGAAGACGCACCGGTCTGCTTTGTAGACTGAGATTGTTAATATTCATAGCAATCTCGGTCTGCAAAGCAGATTTTTTGGCAAGCAAAAGACGGCATACGAGATTGGTGTACCACAGTACACTTCGCCGTCTTCGT
FOS|NM_005252|2379	985	2353	FOS	NM_005252	2379	TAGAAGACGCACCGGTAAGATGGTTGCAGCTAAATGGTTAATATTCATAGCCATTTGGCTGCAGCCATCTTATTTTTTGGCAAGCAAAAGACGGCATACGAGATACGTGTACCACAGTACTGTTCGCCGTCTTCGT
FOS|NM_005252|2380	986	2353	FOS	NM_005252	2380	TAGAAGACGCACCGGACCTATTTGGGTCTTTCTATGGTTAATATTCATAGCCATAGAAGGACCCAGATAGGTTTTTTTGGCAAGCAAAAGACGGCATACGAGATCAGTGTACCACAGTTGGTTTCGCCGTCTTCGT
FOS|NM_005252|2381	987	2353	FOS	NM_005252	2381	TAGAAGACGCACCGGAAGGAGAATCTGAAGGGAAGGGTTAATATTCATAGCCTTTCCCTTCGGATTCTCCTTTTTTTTGGCAAGCAAAAGACGGCATACGAGATACGTGTACCACAGTTGCATTCGCCGTCTTCGT
FOS|NM_005252|2382	988	2353	FOS	NM_005252	2382	TAGAAGACGCACCGGATAAGATGGCTGCAGCTAAATGTTAATATTCATAGCATTTGGCTGCAGCCATCTTATTTTTTTGGCAAGCAAAAGACGGCATACGAGATGTGTGTACCACAGTTGACTTCGCCGTCTTCGT
FOS|NM_005252|2383	989	2353	FOS	NM_005252	2383	TAGAAGACGCACCGGATGATGTTCTTGGGCTTTAACGTTAATATTCATAGCGTTGAAGCCCGAGAACATCATTTTTTTGGCAAGCAAAAGACGGCATACGAGATTGGTGTACCACAGTTGTGTTCGCCGTCTTCGT
PRAME|NM_006115|2384	990	23532	PRAME	NM_006115	2384	TAGAAGACGCACCGGGCTGGACTTTATTGAAGATTTGTTAATATTCATAGCAAATCTTCAATAGAGTCCAGCTTTTTTGGCAAGCAAAAGACGGCATACGAGATCAGTGTACCACACAGTGTTTCGCCGTCTTCGT
PRAME|NM_006115|2385	991	23532	PRAME	NM_006115	2385	TAGAAGACGCACCGGGCCAGATGATTAATCTGTGTAGTTAATATTCATAGCTACGCAGATTAATCATCTGGCTTTTTTGGCAAGCAAAAGACGGCATACGAGATACGTGTACCACACAGTCATTCGCCGTCTTCGT
PRAME|NM_006115|2386	992	23532	PRAME	NM_006115	2386	TAGAAGACGCACCGGCCTGTGATGAATTGTTCTTCTGTTAATATTCATAGCAGGAGAACAATTCATCACAGGTTTTTTGGCAAGCAAAAGACGGCATACGAGATGTGTGTACCACACAGTACTTCGCCGTCTTCGT
PRAME|NM_006115|2387	993	23532	PRAME	NM_006115	2387	TAGAAGACGCACCGGGCTCCCAGTTTACAACTTTAAGTTAATATTCATAGCTTAAGGTTGTAAGCTGGGAGCTTTTTTGGCAAGCAAAAGACGGCATACGAGATTGGTGTACCACACAGTTGTTCGCCGTCTTCGT
PRAME|NM_006115|2388	994	23532	PRAME	NM_006115	2388	TAGAAGACGCACCGGGTGCTGTAAGAAGTTGAAGATGTTAATATTCATAGCATCTTCAGCTTCTTACAGCACTTTTTTGGCAAGCAAAAGACGGCATACGAGATACGTGTACCACACACAGTTTCGCCGTCTTCGT
PRAME|NM_006115|2389	995	23532	PRAME	NM_006115	2389	TAGAAGACGCACCGGGCCCATGTAGGATATTAAGATGTTAATATTCATAGCATCTTGATATCCTGCATGGGCTTTTTTGGCAAGCAAAAGACGGCATACGAGATTGGTGTACCACACACACATTCGCCGTCTTCGT
PRAME|NM_006115|2390	996	23532	PRAME	NM_006115	2390	TAGAAGACGCACCGGGGAAGGTGCTTGTGATGAGTTGTTAATATTCATAGCAATTCATCACAGGCACCTTCCTTTTTTGGCAAGCAAAAGACGGCATACGAGATCAGTGTACCACACACAACTTCGCCGTCTTCGT
PRAME|NM_006115|2391	997	23532	PRAME	NM_006115	2391	TAGAAGACGCACCGGGAGAGTTATGAGGACATTCATGTTAATATTCATAGCATGGATGTCCTCATAACTCTCTTTTTTGGCAAGCAAAAGACGGCATACGAGATGTGTGTACCACACACATGTTCGCCGTCTTCGT
FOSL2|NM_005253|2392	998	2355	FOSL2	NM_005253	2392	TAGAAGACGCACCGGCAGCAGAAATTCTGGGTAGGTGTTAATATTCATAGCATCTACCCGGAATTTCTGCTGTTTTTTGGCAAGCAAAAGACGGCATACGAGATTGGTGTACCACACAACGTTTCGCCGTCTTCGT
FOSL2|NM_005253|2393	999	2355	FOSL2	NM_005253	2393	TAGAAGACGCACCGGGCAGAAATTCTGGGTAGATATGTTAATATTCATAGCATATCTACCCGGAATTTCTGCTTTTTTGGCAAGCAAAAGACGGCATACGAGATGTGTGTACCACACAACCATTCGCCGTCTTCGT
FOSL2|NM_005253|2394	1000	2355	FOSL2	NM_005253	2394	TAGAAGACGCACCGGCAATCATCAGACTCTTTGAACGTTAATATTCATAGCGTTCAAGGAGTCTGATGATTGTTTTTTGGCAAGCAAAAGACGGCATACGAGATACGTGTACCACACAACACTTCGCCGTCTTCGT
FOSL2|NM_005253|2395	1001	2355	FOSL2	NM_005253	2395	TAGAAGACGCACCGGGGAGAAGTTGGAGTTTATGTTGTTAATATTCATAGCAACATGAACTCCAGCTTCTCCTTTTTTGGCAAGCAAAAGACGGCATACGAGATCAGTGTACCACACAACTGTTCGCCGTCTTCGT
FOSL2|NM_005253|2396	1002	2355	FOSL2	NM_005253	2396	TAGAAGACGCACCGGGATTATCCTGGGAACTTTGATGTTAATATTCATAGCGTCAAAGTTCCCGGGATAATCTTTTTTGGCAAGCAAAAGACGGCATACGAGATGTGTGTACCACACATGGTTTCGCCGTCTTCGT
FOSL2|NM_005253|2397	1003	2355	FOSL2	NM_005253	2397	TAGAAGACGCACCGGAAGGAGAAGTTGGAGTTTATGGTTAATATTCATAGCCATGAACTCCAGCTTCTCCTTTTTTTTGGCAAGCAAAAGACGGCATACGAGATCAGTGTACCACACATGCATTCGCCGTCTTCGT
FOSL2|NM_005253|2398	1004	2355	FOSL2	NM_005253	2398	TAGAAGACGCACCGGGGATTATCCTGGGAACTTTGGGTTAATATTCATAGCTCAAAGTTCCCGGGATAATCCTTTTTTGGCAAGCAAAAGACGGCATACGAGATTGGTGTACCACACATGACTTCGCCGTCTTCGT
FOSL2|NM_005253|2399	1005	2355	FOSL2	NM_005253	2399	TAGAAGACGCACCGGAGAAATTCCGGGTAGATATGTGTTAATATTCATAGCGCATATCTACCCGGAATTTCTTTTTTTGGCAAGCAAAAGACGGCATACGAGATACGTGTACCACACATGTGTTCGCCGTCTTCGT
FPGS|NM_001018078|2400	1006	2356	FPGS	NM_001018078	2400	TAGAAGACGCACCGGCTGTGTGTTCATGGAATGTATGTTAATATTCATAGCATACATTCCGTGAAGGCACAGTTTTTTGGCAAGCAAAAGACGGCATACGAGATGTGTGTACCACAACGTGTTTCGCCGTCTTCGT
FPGS|NM_001018078|2401	1007	2356	FPGS	NM_001018078	2401	TAGAAGACGCACCGGTCAGACATAGTTGGAAGCTATGTTAATATTCATAGCATGGCTTCCAACTGTGTCTGATTTTTTGGCAAGCAAAAGACGGCATACGAGATCAGTGTACCACAACGTCATTCGCCGTCTTCGT
FPGS|NM_001018078|2402	1008	2356	FPGS	NM_001018078	2402	TAGAAGACGCACCGGCCGAGTATGGAGTACTAGGATGTTAATATTCATAGCATCCTGGTACTCCATGCTCGGTTTTTTGGCAAGCAAAAGACGGCATACGAGATTGGTGTACCACAACGTACTTCGCCGTCTTCGT
FPGS|NM_001018078|2403	1009	2356	FPGS	NM_001018078	2403	TAGAAGACGCACCGGAGCCCTGCTAGTTTGATTATGGTTAATATTCATAGCCATAGTCAAACTGGCAGGGCTTTTTTTGGCAAGCAAAAGACGGCATACGAGATACGTGTACCACAACGTTGTTCGCCGTCTTCGT
FPGS|NM_001018078|2404	1010	2356	FPGS	NM_001018078	2404	TAGAAGACGCACCGGGCATTTCACATGCCTTGTAATGTTAATATTCATAGCATTGCAAGGCATGTGAAATGCTTTTTTGGCAAGCAAAAGACGGCATACGAGATCAGTGTACCACAACCAGTTTCGCCGTCTTCGT
FPGS|NM_001018078|2405	1011	2356	FPGS	NM_001018078	2405	TAGAAGACGCACCGGGAGAAGATTGCATGGTAGAAAGTTAATATTCATAGCTTTCTGCCATGCGATCTTCTCTTTTTTGGCAAGCAAAAGACGGCATACGAGATACGTGTACCACAACCACATTCGCCGTCTTCGT
FPGS|NM_001018078|2406	1012	2356	FPGS	NM_001018078	2406	TAGAAGACGCACCGGAGACCAACAGAACTTCATAGTGTTAATATTCATAGCACTGTGAAGTTCTGTTGGTCTTTTTTTGGCAAGCAAAAGACGGCATACGAGATGTGTGTACCACAACCAACTTCGCCGTCTTCGT
SMUG1|NM_001243787|2407	1013	23583	SMUG1	NM_001243787	2407	TAGAAGACGCACCGGCATCTATAATCCTGTGGAGTAGTTAATATTCATAGCTACTCCACGGGATTGTAGATGTTTTTTGGCAAGCAAAAGACGGCATACGAGATTGGTGTACCACAACCATGTTCGCCGTCTTCGT
SMUG1|NM_001243787|2408	1014	23583	SMUG1	NM_001243787	2408	TAGAAGACGCACCGGCAGCTTCTTGGGATTTGTGGTGTTAATATTCATAGCATCACAGATCCCAAGAAGCTGTTTTTTGGCAAGCAAAAGACGGCATACGAGATACGTGTACCACAACACGTTTCGCCGTCTTCGT
SMUG1|NM_001243787|2409	1015	23583	SMUG1	NM_001243787	2409	TAGAAGACGCACCGGCATCATCTATAATCCTGTGGAGTTAATATTCATAGCTCCACGGGATTGTAGATGATGTTTTTTGGCAAGCAAAAGACGGCATACGAGATTGGTGTACCACAACACCATTCGCCGTCTTCGT
SMUG1|NM_001243787|2410	1016	23583	SMUG1	NM_001243787	2410	TAGAAGACGCACCGGGTGGCTAAGGAAAGATTGAATGTTAATATTCATAGCATTCAATCTTTCCTTGGCCACTTTTTTGGCAAGCAAAAGACGGCATACGAGATCAGTGTACCACAACACACTTCGCCGTCTTCGT
SMUG1|NM_001243787|2411	1017	23583	SMUG1	NM_001243787	2411	TAGAAGACGCACCGGTGCTGTCACTGTTGTTGAAATGTTAATATTCATAGCATTTCAACAGCAGTGGCAGCATTTTTTGGCAAGCAAAAGACGGCATACGAGATGTGTGTACCACAACACTGTTCGCCGTCTTCGT
SMUG1|NM_001243787|2412	1018	23583	SMUG1	NM_001243787	2412	TAGAAGACGCACCGGAGAGCATCTTAAACGACTAGTGTTAATATTCATAGCACTGGTCGTTTAGGATGCTCTTTTTTTGGCAAGCAAAAGACGGCATACGAGATTGGTGTACCACAACTGGTTTCGCCGTCTTCGT
SMUG1|NM_001243787|2413	1019	23583	SMUG1	NM_001243787	2413	TAGAAGACGCACCGGCTGCTACTGTTGTTGAAATGAGTTAATATTCATAGCTCATTTCAACAGCAGTGGCAGTTTTTTGGCAAGCAAAAGACGGCATACGAGATGTGTGTACCACAACTGCATTCGCCGTCTTCGT
SMUG1|NM_001243787|2414	1020	23583	SMUG1	NM_001243787	2414	TAGAAGACGCACCGGACAGTTTCTTGGGATTTGTGAGTTAATATTCATAGCTCACAGATCCCAAGAAGCTGTTTTTTTGGCAAGCAAAAGACGGCATACGAGATACGTGTACCACAACTGACTTCGCCGTCTTCGT
PRND|NM_012409|2415	1021	23627	PRND	NM_012409	2415	TAGAAGACGCACCGGGCATCAAGCACAGAATTAAGTGTTAATATTCATAGCACTTGATTCTGTGCTTGATGCTTTTTTGGCAAGCAAAAGACGGCATACGAGATCAGTGTACCACAACTGTGTTCGCCGTCTTCGT
PRND|NM_012409|2416	1022	23627	PRND	NM_012409	2416	TAGAAGACGCACCGGTTTGTCACCGGTTGCATTAATGTTAATATTCATAGCATTGATGCAGCCGGTGACAAATTTTTTGGCAAGCAAAAGACGGCATACGAGATTGGTGTACCACATGGTGTTTCGCCGTCTTCGT
PRND|NM_012409|2417	1023	23627	PRND	NM_012409	2417	TAGAAGACGCACCGGTGATTTGGCTCATGGTGAAATGTTAATATTCATAGCATTTCACCGTGAGCCAGATCATTTTTTGGCAAGCAAAAGACGGCATACGAGATGTGTGTACCACATGGTCATTCGCCGTCTTCGT
PRND|NM_012409|2418	1024	23627	PRND	NM_012409	2418	TAGAAGACGCACCGGGGCATCAAGCATAGAATTAAGGTTAATATTCATAGCCTTGATTCTGTGCTTGATGCCTTTTTTGGCAAGCAAAAGACGGCATACGAGATACGTGTACCACATGGTACTTCGCCGTCTTCGT
PRND|NM_012409|2419	1025	23627	PRND	NM_012409	2419	TAGAAGACGCACCGGAGAATTAAGTGGAACTGGAAGGTTAATATTCATAGCCTTCCGGTTCCACTTGATTCTTTTTTTGGCAAGCAAAAGACGGCATACGAGATCAGTGTACCACATGGTTGTTCGCCGTCTTCGT
PRND|NM_012409|2420	1026	23627	PRND	NM_012409	2420	TAGAAGACGCACCGGAATGTGACCAAGGAGGTATTTGTTAATATTCATAGCAAATGCCTCCTTGGTCACATTTTTTTTGGCAAGCAAAAGACGGCATACGAGATGTGTGTACCACATGCAGTTTCGCCGTCTTCGT
PRND|NM_012409|2421	1027	23627	PRND	NM_012409	2421	TAGAAGACGCACCGGGATCTGGTTCATGGTGAAATAGTTAATATTCATAGCTATTTCACCGTGAGCCAGATCTTTTTTGGCAAGCAAAAGACGGCATACGAGATCAGTGTACCACATGCACATTCGCCGTCTTCGT
PRND|NM_012409|2422	1028	23627	PRND	NM_012409	2422	TAGAAGACGCACCGGGGGCATCAAGCATAGAATTAAGTTAATATTCATAGCTTGATTCTGTGCTTGATGCCCTTTTTTGGCAAGCAAAAGACGGCATACGAGATTGGTGTACCACATGCAACTTCGCCGTCTTCGT
LY96|NM_001195797|2423	1029	23643	LY96	NM_001195797	2423	TAGAAGACGCACCGGGAGACTGTGAATACAACAATAGTTAATATTCATAGCTATTGTTGTATTCACAGTCTCTTTTTTGGCAAGCAAAAGACGGCATACGAGATACGTGTACCACATGCATGTTCGCCGTCTTCGT
LY96|NM_001195797|2424	1030	23643	LY96	NM_001195797	2424	TAGAAGACGCACCGGGTCATCCTACACCAACTTAATGTTAATATTCATAGCATTAGGTTGGTGTAGGATGACTTTTTTGGCAAGCAAAAGACGGCATACGAGATCAGTGTACCACATGACGTTTCGCCGTCTTCGT
LY96|NM_001195797|2425	1031	23643	LY96	NM_001195797	2425	TAGAAGACGCACCGGCTGAAGGGAGAGATTGTGAGTGTTAATATTCATAGCATTCACAGTCTCTCCCTTCAGTTTTTTGGCAAGCAAAAGACGGCATACGAGATACGTGTACCACATGACCATTCGCCGTCTTCGT
LY96|NM_001195797|2426	1032	23643	LY96	NM_001195797	2426	TAGAAGACGCACCGGTGTTCCAAAGCGTAAAGAAGTGTTAATATTCATAGCACTTCTTTGCGCTTTGGAAGATTTTTTGGCAAGCAAAAGACGGCATACGAGATGTGTGTACCACATGACACTTCGCCGTCTTCGT
LY96|NM_001195797|2427	1033	23643	LY96	NM_001195797	2427	TAGAAGACGCACCGGGATCCAAAGGATTATTGTACAGTTAATATTCATAGCTGTGCAATAATCCTTTGGATCTTTTTTGGCAAGCAAAAGACGGCATACGAGATTGGTGTACCACATGACTGTTCGCCGTCTTCGT
LY96|NM_001195797|2428	1034	23643	LY96	NM_001195797	2428	TAGAAGACGCACCGGGAAGGGAGAGATTGTGAATATGTTAATATTCATAGCGTATTCACAGTCTCTCCCTTCTTTTTTGGCAAGCAAAAGACGGCATACGAGATACGTGTACCACATGTGGTTTCGCCGTCTTCGT
LY96|NM_001195797|2429	1035	23643	LY96	NM_001195797	2429	TAGAAGACGCACCGGGGAGAGACTGTGAATATAACAGTTAATATTCATAGCTGTTGTATTCACAGTCTCTCCTTTTTTGGCAAGCAAAAGACGGCATACGAGATTGGTGTACCACATGTGCATTCGCCGTCTTCGT
LY96|NM_001195797|2430	1036	23643	LY96	NM_001195797	2430	TAGAAGACGCACCGGGTTATTTGCCGAGGATTTGATGTTAATATTCATAGCATCAGATCCTCGGCAAATAACTTTTTTGGCAAGCAAAAGACGGCATACGAGATCAGTGTACCACATGTGACTTCGCCGTCTTCGT
STX12|NM_177424|2431	1037	23673	STX12	NM_177424	2431	TAGAAGACGCACCGGCGAGCTGCTTACTATTAGAAAGTTAATATTCATAGCTTTCTGATAGTAAGCAGCTCGTTTTTTGGCAAGCAAAAGACGGCATACGAGATGTGTGTACCACATGTGTGTTCGCCGTCTTCGT
STX12|NM_177424|2432	1038	23673	STX12	NM_177424	2432	TAGAAGACGCACCGGCGCCAAGGAAATAAATGAATTGTTAATATTCATAGCAATTCATTTGTTTCCTTGGCGTTTTTTGGCAAGCAAAAGACGGCATACGAGATGTGTGTACCAACGTGTGTTTCGCCGTCTTCGT
STX12|NM_177424|2433	1039	23673	STX12	NM_177424	2433	TAGAAGACGCACCGGGCAGGATTTGGAACTTATTAAGTTAATATTCATAGCTTAATAAGTTCCAAATCCTGCTTTTTTGGCAAGCAAAAGACGGCATACGAGATCAGTGTACCAACGTGTCATTCGCCGTCTTCGT
STX12|NM_177424|2434	1040	23673	STX12	NM_177424	2434	TAGAAGACGCACCGGGCCACTGCTTAGATAAAGAATGTTAATATTCATAGCATTCTTTATCTGAGCAGTGGCTTTTTTGGCAAGCAAAAGACGGCATACGAGATTGGTGTACCAACGTGTACTTCGCCGTCTTCGT
STX12|NM_177424|2435	1041	23673	STX12	NM_177424	2435	TAGAAGACGCACCGGGCTTGTCCTGTTAGTGATTATGTTAATATTCATAGCATAATCACTGACAGGACAAGCTTTTTTGGCAAGCAAAAGACGGCATACGAGATACGTGTACCAACGTGTTGTTCGCCGTCTTCGT
STX12|NM_177424|2436	1042	23673	STX12	NM_177424	2436	TAGAAGACGCACCGGTTCTCTGCAGCCTTAAATAATGTTAATATTCATAGCATTGTTTAAGGCTGCAGAGAATTTTTTGGCAAGCAAAAGACGGCATACGAGATCAGTGTACCAACGTCAGTTTCGCCGTCTTCGT
STX12|NM_177424|2437	1043	23673	STX12	NM_177424	2437	TAGAAGACGCACCGGCAGAAGGAATGCCTTATGAATGTTAATATTCATAGCATTCATGAGGCGTTCCTTCTGTTTTTTGGCAAGCAAAAGACGGCATACGAGATACGTGTACCAACGTCACATTCGCCGTCTTCGT
STX12|NM_177424|2438	1044	23673	STX12	NM_177424	2438	TAGAAGACGCACCGGAGAGTATTGTCAGAGTAAGAGGTTAATATTCATAGCCTCTTGCTCTGGCAATACTCTTTTTTTGGCAAGCAAAAGACGGCATACGAGATGTGTGTACCAACGTCAACTTCGCCGTCTTCGT
OSBP2|NM_030758|2439	1045	23762	OSBP2	NM_030758	2439	TAGAAGACGCACCGGCTACAGAAATTAGGGTGAAATGTTAATATTCATAGCATTTCACCCTGATTTCTGTAGTTTTTTGGCAAGCAAAAGACGGCATACGAGATTGGTGTACCAACGTCATGTTCGCCGTCTTCGT
OSBP2|NM_030758|2440	1046	23762	OSBP2	NM_030758	2440	TAGAAGACGCACCGGCAATGGTTTGCTCTCTTATTAGTTAATATTCATAGCTAGTAAGAGAGCAAACCATTGTTTTTTGGCAAGCAAAAGACGGCATACGAGATACGTGTACCAACGTACGTTTCGCCGTCTTCGT
OSBP2|NM_030758|2441	1047	23762	OSBP2	NM_030758	2441	TAGAAGACGCACCGGGCTTCTTAAGTGGACCAATTAGTTAATATTCATAGCTAGTTGGTCCACTTGAGAAGCTTTTTTGGCAAGCAAAAGACGGCATACGAGATTGGTGTACCAACGTACCATTCGCCGTCTTCGT
OSBP2|NM_030758|2442	1048	23762	OSBP2	NM_030758	2442	TAGAAGACGCACCGGGAACTAGCAGAGATACATAGTGTTAATATTCATAGCACTGTGTATCTCTGCTAGTTCTTTTTTGGCAAGCAAAAGACGGCATACGAGATCAGTGTACCAACGTACACTTCGCCGTCTTCGT
OSBP2|NM_030758|2443	1049	23762	OSBP2	NM_030758	2443	TAGAAGACGCACCGGGAACAAATGGAGTGTTCTAAGGTTAATATTCATAGCCTTGGAGCACTCCATTTGTTCTTTTTTGGCAAGCAAAAGACGGCATACGAGATGTGTGTACCAACGTACTGTTCGCCGTCTTCGT
OSBP2|NM_030758|2444	1050	23762	OSBP2	NM_030758	2444	TAGAAGACGCACCGGGTGCATTTGGAGGAAACTATTGTTAATATTCATAGCAATGGTTTCCTCCAAGTGCACTTTTTTGGCAAGCAAAAGACGGCATACGAGATTGGTGTACCAACGTTGGTTTCGCCGTCTTCGT
OSBP2|NM_030758|2445	1051	23762	OSBP2	NM_030758	2445	TAGAAGACGCACCGGAGATCACCATTTCCAGTAAGTGTTAATATTCATAGCACTTGCTGGAGATGGTGATCTTTTTTTGGCAAGCAAAAGACGGCATACGAGATGTGTGTACCAACGTTGCATTCGCCGTCTTCGT
OSBP2|NM_030758|2446	1052	23762	OSBP2	NM_030758	2446	TAGAAGACGCACCGGCTTCTCAAGTGGACCAATTATGTTAATATTCATAGCATAGTTGGTCCACTTGAGAAGTTTTTTGGCAAGCAAAAGACGGCATACGAGATACGTGTACCAACGTTGACTTCGCCGTCTTCGT
ALK|NM_004304|2447	1053	238	ALK	NM_004304	2447	TAGAAGACGCACCGGACCCAAATCAAGAAACTTGTTGTTAATATTCATAGCAACAGGTTTCTTGATTTGGGTTTTTTTGGCAAGCAAAAGACGGCATACGAGATCAGTGTACCAACGTTGTGTTCGCCGTCTTCGT
ALK|NM_004304|2448	1054	238	ALK	NM_004304	2448	TAGAAGACGCACCGGCTGGTTATAGCTCTTTGGAATGTTAATATTCATAGCATTCCAAGGAGCTATGACCAGTTTTTTGGCAAGCAAAAGACGGCATACGAGATTGGTGTACCAACCAGTGTTTCGCCGTCTTCGT
ALK|NM_004304|2449	1055	238	ALK	NM_004304	2449	TAGAAGACGCACCGGCTTCGTTGACTGCTAATATGAGTTAATATTCATAGCTCATATTGGCAGTCAGCGAAGTTTTTTGGCAAGCAAAAGACGGCATACGAGATGTGTGTACCAACCAGTCATTCGCCGTCTTCGT
ALK|NM_004304|2450	1056	238	ALK	NM_004304	2450	TAGAAGACGCACCGGGCAGAATACAGCACTCAAATTGTTAATATTCATAGCGATTTGGGTGCTGTATTCTGCTTTTTTGGCAAGCAAAAGACGGCATACGAGATACGTGTACCAACCAGTACTTCGCCGTCTTCGT
ALK|NM_004304|2451	1057	238	ALK	NM_004304	2451	TAGAAGACGCACCGGTTCCCTTGTGGGAATGTTAATGTTAATATTCATAGCATTGACATTCCCACAAGGGAATTTTTTGGCAAGCAAAAGACGGCATACGAGATCAGTGTACCAACCAGTTGTTCGCCGTCTTCGT
ALK|NM_004304|2452	1058	238	ALK	NM_004304	2452	TAGAAGACGCACCGGAGGCCTTTATGGAAGGAATATGTTAATATTCATAGCATATTCCTTCCATGAAGGCCTTTTTTTGGCAAGCAAAAGACGGCATACGAGATGTGTGTACCAACCACAGTTTCGCCGTCTTCGT
ALK|NM_004304|2453	1059	238	ALK	NM_004304	2453	TAGAAGACGCACCGGGTTCTAGGGTTAAACGGTAATGTTAATATTCATAGCATTGCCGTTTAGCCCTAGAACTTTTTTGGCAAGCAAAAGACGGCATACGAGATCAGTGTACCAACCACACATTCGCCGTCTTCGT
ALK|NM_004304|2454	1060	238	ALK	NM_004304	2454	TAGAAGACGCACCGGATGGAATCTCACTTGGATAATGTTAATATTCATAGCATTATCCAGGTGAGATTCCATTTTTTTGGCAAGCAAAAGACGGCATACGAGATTGGTGTACCAACCACAACTTCGCCGTCTTCGT
ALOX5|NM_000698|2455	1061	240	ALOX5	NM_000698	2455	TAGAAGACGCACCGGCGAGATGACCAAATTCATATTGTTAATATTCATAGCAATGTGAATTTGGTCATCTCGTTTTTTGGCAAGCAAAAGACGGCATACGAGATACGTGTACCAACCACATGTTCGCCGTCTTCGT
ALOX5|NM_000698|2456	1062	240	ALOX5	NM_000698	2456	TAGAAGACGCACCGGCCCGTGATATCTAGTTTGATAGTTAATATTCATAGCTATCAAACTGGATATCACGGGTTTTTTGGCAAGCAAAAGACGGCATACGAGATCAGTGTACCAACCAACGTTTCGCCGTCTTCGT
ALOX5|NM_000698|2457	1063	240	ALOX5	NM_000698	2457	TAGAAGACGCACCGGATTTCTGAGCGGGTTATGAATGTTAATATTCATAGCATTCATGACCCGCTCAGAAATTTTTTTGGCAAGCAAAAGACGGCATACGAGATACGTGTACCAACCAACCATTCGCCGTCTTCGT
ALOX5|NM_000698|2458	1064	240	ALOX5	NM_000698	2458	TAGAAGACGCACCGGTGCCATCCAGTTCAACTAAATGTTAATATTCATAGCATTTGGTTGAGCTGGATGGCATTTTTTGGCAAGCAAAAGACGGCATACGAGATGTGTGTACCAACCAACACTTCGCCGTCTTCGT
ALOX5|NM_000698|2459	1065	240	ALOX5	NM_000698	2459	TAGAAGACGCACCGGCGTGAGATTCACCATTGTAATGTTAATATTCATAGCATTGCAATGGTGAATCTCACGTTTTTTGGCAAGCAAAAGACGGCATACGAGATTGGTGTACCAACCAACTGTTCGCCGTCTTCGT
ALOX5|NM_000698|2460	1066	240	ALOX5	NM_000698	2460	TAGAAGACGCACCGGGATGGCATTGATGCCAATAAAGTTAATATTCATAGCTTTGTTGGCATCGATGCCATCTTTTTTGGCAAGCAAAAGACGGCATACGAGATACGTGTACCAACCATGGTTTCGCCGTCTTCGT
ALOX5|NM_000698|2461	1067	240	ALOX5	NM_000698	2461	TAGAAGACGCACCGGGCATGTACCTAGAAGAGTATTGTTAATATTCATAGCAATGCTCTTCTGGGTACATGCTTTTTTGGCAAGCAAAAGACGGCATACGAGATTGGTGTACCAACCATGCATTCGCCGTCTTCGT
ALOX12B|NM_001139|2462	1068	242	ALOX12B	NM_001139	2462	TAGAAGACGCACCGGCCTGAGTGGAATGGTTATATTGTTAATATTCATAGCAATATAGCCATTCCACTCAGGTTTTTTGGCAAGCAAAAGACGGCATACGAGATCAGTGTACCAACCATGACTTCGCCGTCTTCGT
ALOX12B|NM_001139|2463	1069	242	ALOX12B	NM_001139	2463	TAGAAGACGCACCGGCTATATTCCGGGATTCTCAATGTTAATATTCATAGCATTGGGAATCCCGGAATATAGTTTTTTGGCAAGCAAAAGACGGCATACGAGATGTGTGTACCAACCATGTGTTCGCCGTCTTCGT
ALOX12B|NM_001139|2464	1070	242	ALOX12B	NM_001139	2464	TAGAAGACGCACCGGTCAACTTTAAGGCCACTAAGTGTTAATATTCATAGCACTTGGTGGCCTTAAAGTTGATTTTTTGGCAAGCAAAAGACGGCATACGAGATACGTGTACCAACACGTGTTTCGCCGTCTTCGT
ALOX12B|NM_001139|2465	1071	242	ALOX12B	NM_001139	2465	TAGAAGACGCACCGGCATGGCATTGGCTTTCAAGGTGTTAATATTCATAGCACTTTGAAAGCCAGTGCCATGTTTTTTGGCAAGCAAAAGACGGCATACGAGATTGGTGTACCAACACGTCATTCGCCGTCTTCGT
ALOX12B|NM_001139|2466	1072	242	ALOX12B	NM_001139	2466	TAGAAGACGCACCGGGGGTGTAGGAAATATTTAAAGGTTAATATTCATAGCCTTTAAATATTTCCTGCACCCTTTTTTGGCAAGCAAAAGACGGCATACGAGATCAGTGTACCAACACGTACTTCGCCGTCTTCGT
ALOX12B|NM_001139|2467	1073	242	ALOX12B	NM_001139	2467	TAGAAGACGCACCGGACACTTTCTTTGGGTACTAGTGTTAATATTCATAGCACTGGTACCCAAAGAAGGTGTTTTTTTGGCAAGCAAAAGACGGCATACGAGATGTGTGTACCAACACGTTGTTCGCCGTCTTCGT
ALOX12B|NM_001139|2468	1074	242	ALOX12B	NM_001139	2468	TAGAAGACGCACCGGACACAAGGGGAGAGCTATAAGGTTAATATTCATAGCCTTATGGCTCTCTCCTTGTGTTTTTTTGGCAAGCAAAAGACGGCATACGAGATTGGTGTACCAACACCAGTTTCGCCGTCTTCGT
ALOX12B|NM_001139|2469	1075	242	ALOX12B	NM_001139	2469	TAGAAGACGCACCGGGATACACCGTCTAGATCAATAGTTAATATTCATAGCTGTTGATCTGGACGGTGTATCTTTTTTGGCAAGCAAAAGACGGCATACGAGATGTGTGTACCAACACCACATTCGCCGTCTTCGT
MTOR|NM_004958|2470	1076	2475	MTOR	NM_004958	2470	TAGAAGACGCACCGGCCTGGCAATAATAGGAGAATTGTTAATATTCATAGCAATTCTCCTATTGTTGCCAGGTTTTTTGGCAAGCAAAAGACGGCATACGAGATACGTGTACCAACACCAACTTCGCCGTCTTCGT
MTOR|NM_004958|2471	1077	2475	MTOR	NM_004958	2471	TAGAAGACGCACCGGCCTCCTATTGTTAAGTTGTTTGTTAATATTCATAGCAAACAACTTAACAATAGGAGGTTTTTTGGCAAGCAAAAGACGGCATACGAGATCAGTGTACCAACACCATGTTCGCCGTCTTCGT
MTOR|NM_004958|2472	1078	2475	MTOR	NM_004958	2472	TAGAAGACGCACCGGGCCAGAATCTATTCATTCTTTGTTAATATTCATAGCAAAGAATGAATAGATTCTGGCTTTTTTGGCAAGCAAAAGACGGCATACGAGATGTGTGTACCAACACACGTTTCGCCGTCTTCGT
MTOR|NM_004958|2473	1079	2475	MTOR	NM_004958	2473	TAGAAGACGCACCGGGCATGGAAGAATACACTTGTAGTTAATATTCATAGCTACAGGTGTATTCTTCCATGCTTTTTTGGCAAGCAAAAGACGGCATACGAGATCAGTGTACCAACACACCATTCGCCGTCTTCGT
MTOR|NM_004958|2474	1080	2475	MTOR	NM_004958	2474	TAGAAGACGCACCGGGCAACCCTTCTTTGATAACATGTTAATATTCATAGCATGTTGTCAAAGAAGGGTTGCTTTTTTGGCAAGCAAAAGACGGCATACGAGATTGGTGTACCAACACACACTTCGCCGTCTTCGT
MTOR|NM_004958|2475	1081	2475	MTOR	NM_004958	2475	TAGAAGACGCACCGGGCTGTGCTACACTACAAATATGTTAATATTCATAGCATGTTTGTAGTGTAGCACAGCTTTTTTGGCAAGCAAAAGACGGCATACGAGATACGTGTACCAACACACTGTTCGCCGTCTTCGT
MTOR|NM_004958|2476	1082	2475	MTOR	NM_004958	2476	TAGAAGACGCACCGGGCCTTGTTTGTGGCTTTGAGTGTTAATATTCATAGCATTCAGAGCCACAAACAAGGCTTTTTTGGCAAGCAAAAGACGGCATACGAGATCAGTGTACCAACACTGGTTTCGCCGTCTTCGT
MTOR|NM_004958|2477	1083	2475	MTOR	NM_004958	2477	TAGAAGACGCACCGGGAACCAATTATACCTGTTCTTGTTAATATTCATAGCAAGAACGGGTATAATTGGTTCTTTTTTGGCAAGCAAAAGACGGCATACGAGATACGTGTACCAACACTGCATTCGCCGTCTTCGT
FRZB|NM_001463|2478	1084	2487	FRZB	NM_001463	2478	TAGAAGACGCACCGGCGCTGTAAATGTAAGCTTATTGTTAATATTCATAGCAATAGGCTTACATTTACAGCGTTTTTTGGCAAGCAAAAGACGGCATACGAGATGTGTGTACCAACACTGACTTCGCCGTCTTCGT
FRZB|NM_001463|2479	1085	2487	FRZB	NM_001463	2479	TAGAAGACGCACCGGGCCCTGGAATATGATTAAGATGTTAATATTCATAGCATCTTAGTCATGTTCCAGGGCTTTTTTGGCAAGCAAAAGACGGCATACGAGATTGGTGTACCAACACTGTGTTCGCCGTCTTCGT
FRZB|NM_001463|2480	1086	2487	FRZB	NM_001463	2480	TAGAAGACGCACCGGCGTCATCTTGGACTTAGTAAAGTTAATATTCATAGCTTTACTGAGTCCAAGATGACGTTTTTTGGCAAGCAAAAGACGGCATACGAGATCAGTGTACCAACTGGTGTTTCGCCGTCTTCGT
FRZB|NM_001463|2481	1087	2487	FRZB	NM_001463	2481	TAGAAGACGCACCGGACGCAACTAAATCCTGAAATAGTTAATATTCATAGCTATTTCGGGATTTAGTTGCGTTTTTTTGGCAAGCAAAAGACGGCATACGAGATACGTGTACCAACTGGTCATTCGCCGTCTTCGT
FRZB|NM_001463|2482	1088	2487	FRZB	NM_001463	2482	TAGAAGACGCACCGGAGGACCTATTTCCGGAATAATGTTAATATTCATAGCATTGTTCCGGAAATAGGTCTTTTTTTTGGCAAGCAAAAGACGGCATACGAGATGTGTGTACCAACTGGTACTTCGCCGTCTTCGT
FRZB|NM_001463|2483	1089	2487	FRZB	NM_001463	2483	TAGAAGACGCACCGGAAAGTCCTCTCTGGTAAATATGTTAATATTCATAGCATGTTTACCAGAGAGGACTTTTTTTTTGGCAAGCAAAAGACGGCATACGAGATTGGTGTACCAACTGGTTGTTCGCCGTCTTCGT
FRZB|NM_001463|2484	1090	2487	FRZB	NM_001463	2484	TAGAAGACGCACCGGGATTCCACTTAGAGTTAGAAGGTTAATATTCATAGCCTTCTGACTCTGAGTGGAATCTTTTTTGGCAAGCAAAAGACGGCATACGAGATACGTGTACCAACTGCAGTTTCGCCGTCTTCGT
FRZB|NM_001463|2485	1091	2487	FRZB	NM_001463	2485	TAGAAGACGCACCGGCAAGCAGTGAACGTTGTAAATGTTAATATTCATAGCATTTACAGCGTTCACTGCTTGTTTTTTGGCAAGCAAAAGACGGCATACGAGATTGGTGTACCAACTGCACATTCGCCGTCTTCGT
ABL1|NM_005157|2486	1092	25	ABL1	NM_005157	2486	TAGAAGACGCACCGGGAAAGAGATCAAACACTCTAAGTTAATATTCATAGCTTAGGGTGTTTGATCTCTTTCTTTTTTGGCAAGCAAAAGACGGCATACGAGATCAGTGTACCAACTGCAACTTCGCCGTCTTCGT
ABL1|NM_005157|2487	1093	25	ABL1	NM_005157	2487	TAGAAGACGCACCGGCCGAGTTGGTTCATCATTATTGTTAATATTCATAGCAATGATGATGAACCAACTCGGTTTTTTGGCAAGCAAAAGACGGCATACGAGATGTGTGTACCAACTGCATGTTCGCCGTCTTCGT
ABL1|NM_005157|2488	1094	25	ABL1	NM_005157	2488	TAGAAGACGCACCGGGCTGAAATCTACCAAGTCTTTGTTAATATTCATAGCAAAGGCTTGGTGGATTTCAGCTTTTTTGGCAAGCAAAAGACGGCATACGAGATTGGTGTACCAACTGACGTTTCGCCGTCTTCGT
ABL1|NM_005157|2489	1095	25	ABL1	NM_005157	2489	TAGAAGACGCACCGGGCAGTCATGAAAGAGATTAAAGTTAATATTCATAGCTTTGATCTCTTTCATGACTGCTTTTTTGGCAAGCAAAAGACGGCATACGAGATGTGTGTACCAACTGACCATTCGCCGTCTTCGT
ABL1|NM_005157|2490	1096	25	ABL1	NM_005157	2490	TAGAAGACGCACCGGCCGCCTTCATTCCTCTTATATGTTAATATTCATAGCATATGAGAGGGATGAAGGCGGTTTTTTGGCAAGCAAAAGACGGCATACGAGATACGTGTACCAACTGACACTTCGCCGTCTTCGT
ABL1|NM_005157|2491	1097	25	ABL1	NM_005157	2491	TAGAAGACGCACCGGACAGTTTGACTCGTCCATATTGTTAATATTCATAGCAATGTGGACGAGTCAAACTGTTTTTTTGGCAAGCAAAAGACGGCATACGAGATCAGTGTACCAACTGACTGTTCGCCGTCTTCGT
ABL1|NM_005157|2492	1098	25	ABL1	NM_005157	2492	TAGAAGACGCACCGGTGTGGATTCCATCCAGTAAATGTTAATATTCATAGCATTTGCTGGATGGAATCCACATTTTTTGGCAAGCAAAAGACGGCATACGAGATGTGTGTACCAACTGTGGTTTCGCCGTCTTCGT
ADAM2|NM_001464|2493	1099	2515	ADAM2	NM_001464	2493	TAGAAGACGCACCGGGCGCTACATTGAGAATATTTAGTTAATATTCATAGCTAAATGTTCTCAATGTAGCGCTTTTTTGGCAAGCAAAAGACGGCATACGAGATCAGTGTACCAACTGTGCATTCGCCGTCTTCGT
ADAM2|NM_001464|2494	1100	2515	ADAM2	NM_001464	2494	TAGAAGACGCACCGGTGCCACTACTAAGGGTATATTGTTAATATTCATAGCAATATACCCTTGGTAGTGGCATTTTTTGGCAAGCAAAAGACGGCATACGAGATTGGTGTACCAACTGTGACTTCGCCGTCTTCGT
ADAM2|NM_001464|2495	1101	2515	ADAM2	NM_001464	2495	TAGAAGACGCACCGGATTCCAAGAGCCACTATTATTGTTAATATTCATAGCAATAATAGTGGCTCTTGGAATTTTTTTGGCAAGCAAAAGACGGCATACGAGATACGTGTACCAACTGTGTGTTCGCCGTCTTCGT
ADAM2|NM_001464|2496	1102	2515	ADAM2	NM_001464	2496	TAGAAGACGCACCGGGCTGTGGATGGATAGTAATTTGTTAATATTCATAGCAAATTACTGTCCATCCGCAGCTTTTTTGGCAAGCAAAAGACGGCATACGAGATCAGTGTACCATGGTGTGTTTCGCCGTCTTCGT
ADAM2|NM_001464|2497	1103	2515	ADAM2	NM_001464	2497	TAGAAGACGCACCGGGGAACTTCTTGTGGTTTAAATGTTAATATTCATAGCATTTGAACCACAAGAAGTTCCTTTTTTGGCAAGCAAAAGACGGCATACGAGATACGTGTACCATGGTGTCATTCGCCGTCTTCGT
ADAM2|NM_001464|2498	1104	2515	ADAM2	NM_001464	2498	TAGAAGACGCACCGGGGAGCTGTCTGTATTATGAATGTTAATATTCATAGCATTCATAATGCAGACAGCTCCTTTTTTGGCAAGCAAAAGACGGCATACGAGATGTGTGTACCATGGTGTACTTCGCCGTCTTCGT
ADAM2|NM_001464|2499	1105	2515	ADAM2	NM_001464	2499	TAGAAGACGCACCGGGGGAGTATTGATAGTGGTAATGTTAATATTCATAGCATTGCCACTGTCAATACTCCCTTTTTTGGCAAGCAAAAGACGGCATACGAGATTGGTGTACCATGGTGTTGTTCGCCGTCTTCGT
ADAM2|NM_001464|2500	1106	2515	ADAM2	NM_001464	2500	TAGAAGACGCACCGGGATTTAAAGCCGGTTTAAACTGTTAATATTCATAGCAGTTTGAACCGGCTTTAAATCTTTTTTGGCAAGCAAAAGACGGCATACGAGATACGTGTACCATGGTCAGTTTCGCCGTCTTCGT
FUS|NM_001170634|2501	1107	2521	FUS	NM_001170634	2501	TAGAAGACGCACCGGGCCTGGGTGAGAGTGTTATAAGTTAATATTCATAGCTTGTAACATTCTCACCCAGGCTTTTTTGGCAAGCAAAAGACGGCATACGAGATTGGTGTACCATGGTCACATTCGCCGTCTTCGT
FUS|NM_001170634|2502	1108	2521	FUS	NM_001170634	2502	TAGAAGACGCACCGGCGTGGTGGCTTTAATAAATTTGTTAATATTCATAGCAAATTTATTGAAGCCACCACGTTTTTTGGCAAGCAAAAGACGGCATACGAGATCAGTGTACCATGGTCAACTTCGCCGTCTTCGT
FUS|NM_001170634|2503	1109	2521	FUS	NM_001170634	2503	TAGAAGACGCACCGGATGAATGCAACTAGTGTAAGGGTTAATATTCATAGCCCTTACACTGGTTGCATTCATTTTTTTGGCAAGCAAAAGACGGCATACGAGATGTGTGTACCATGGTCATGTTCGCCGTCTTCGT
FUS|NM_001170634|2504	1110	2521	FUS	NM_001170634	2504	TAGAAGACGCACCGGTCGCAGGGAGAGGCTGTATTGGTTAATATTCATAGCTAATACGGCCTCTCCCTGCGATTTTTTGGCAAGCAAAAGACGGCATACGAGATTGGTGTACCATGGTACGTTTCGCCGTCTTCGT
FUS|NM_001170634|2505	1111	2521	FUS	NM_001170634	2505	TAGAAGACGCACCGGGCTGATTACTTCAAGTAGATTGTTAATATTCATAGCAATCTGCTTGAAGTAATCAGCTTTTTTGGCAAGCAAAAGACGGCATACGAGATGTGTGTACCATGGTACCATTCGCCGTCTTCGT
FUS|NM_001170634|2506	1112	2521	FUS	NM_001170634	2506	TAGAAGACGCACCGGCCAGAGCAGTTATTCTTCTTAGTTAATATTCATAGCTAAGAAGAATAGCTGCTCTGGTTTTTTGGCAAGCAAAAGACGGCATACGAGATACGTGTACCATGGTACACTTCGCCGTCTTCGT
FUS|NM_001170634|2507	1113	2521	FUS	NM_001170634	2507	TAGAAGACGCACCGGCCTGGGTGAGAATGTTATAATGTTAATATTCATAGCATTGTAACATTCTCACCCAGGTTTTTTGGCAAGCAAAAGACGGCATACGAGATCAGTGTACCATGGTACTGTTCGCCGTCTTCGT
FUS|NM_001170634|2508	1114	2521	FUS	NM_001170634	2508	TAGAAGACGCACCGGCGAACAGGATAATTCAGATAAGTTAATATTCATAGCTTGTCTGAATTATCCTGTTCGTTTTTTGGCAAGCAAAAGACGGCATACGAGATGTGTGTACCATGGTTGGTTTCGCCGTCTTCGT
KDSR|NM_002035|2509	1115	2531	KDSR	NM_002035	2509	TAGAAGACGCACCGGCCAGTGGATATGTTGGTAAATGTTAATATTCATAGCATTTACCAGCATGTCCACTGGTTTTTTGGCAAGCAAAAGACGGCATACGAGATCAGTGTACCATGGTTGCATTCGCCGTCTTCGT
KDSR|NM_002035|2510	1116	2531	KDSR	NM_002035	2510	TAGAAGACGCACCGGGCCTTTGGAGATTCGATTTATGTTAATATTCATAGCATAAGTCGAGTCTCCAAAGGCTTTTTTGGCAAGCAAAAGACGGCATACGAGATTGGTGTACCATGGTTGACTTCGCCGTCTTCGT
KDSR|NM_002035|2511	1117	2531	KDSR	NM_002035	2511	TAGAAGACGCACCGGGCATTGCTATCGAGTGTTATAGTTAATATTCATAGCTATAGCACTCGATAGCAATGCTTTTTTGGCAAGCAAAAGACGGCATACGAGATACGTGTACCATGGTTGTGTTCGCCGTCTTCGT
KDSR|NM_002035|2512	1118	2531	KDSR	NM_002035	2512	TAGAAGACGCACCGGGCTGGTAAATTGTGTAGGAATGTTAATATTCATAGCATTCCTGCACAATTTACCAGCTTTTTTGGCAAGCAAAAGACGGCATACGAGATGTGTGTACCATGCAGTGTTTCGCCGTCTTCGT
KDSR|NM_002035|2513	1119	2531	KDSR	NM_002035	2513	TAGAAGACGCACCGGGCTGCAGGTAAAGAAAGAAATGTTAATATTCATAGCATTTCTTTCTTTGCCTGCAGCTTTTTTGGCAAGCAAAAGACGGCATACGAGATCAGTGTACCATGCAGTCATTCGCCGTCTTCGT
KDSR|NM_002035|2514	1120	2531	KDSR	NM_002035	2514	TAGAAGACGCACCGGGCTGTATGATGTAGAGAGAAAGTTAATATTCATAGCTTTCTCTCTGCATCATGCAGCTTTTTTGGCAAGCAAAAGACGGCATACGAGATTGGTGTACCATGCAGTACTTCGCCGTCTTCGT
KDSR|NM_002035|2515	1121	2531	KDSR	NM_002035	2515	TAGAAGACGCACCGGGGTGGTGCTTTGTATATTAGTGTTAATATTCATAGCACTGATATGCAAAGCACCACCTTTTTTGGCAAGCAAAAGACGGCATACGAGATACGTGTACCATGCAGTTGTTCGCCGTCTTCGT
KDSR|NM_002035|2516	1122	2531	KDSR	NM_002035	2516	TAGAAGACGCACCGGGGAAGTGTATTGCTATTGAGTGTTAATATTCATAGCACTCGATAGCAATGCACTTCCTTTTTTGGCAAGCAAAAGACGGCATACGAGATCAGTGTACCATGCACAGTTTCGCCGTCTTCGT
G6PD|NM_000402|2517	1123	2539	G6PD	NM_000402	2517	TAGAAGACGCACCGGCAACAGATACAAGAATGTGAAGTTAATATTCATAGCTTCACGTTCTTGTATCTGTTGTTTTTTGGCAAGCAAAAGACGGCATACGAGATACGTGTACCATGCACACATTCGCCGTCTTCGT
G6PD|NM_000402|2518	1124	2539	G6PD	NM_000402	2518	TAGAAGACGCACCGGCCCTATATTTATGGTAGCTGAGTTAATATTCATAGCTCGGCTGCCATAAATATAGGGTTTTTTGGCAAGCAAAAGACGGCATACGAGATGTGTGTACCATGCACAACTTCGCCGTCTTCGT
G6PD|NM_000402|2519	1125	2539	G6PD	NM_000402	2519	TAGAAGACGCACCGGTCAGTCGGATACACATATATTGTTAATATTCATAGCAATATGTGTGTATCCGACTGATTTTTTGGCAAGCAAAAGACGGCATACGAGATTGGTGTACCATGCACATGTTCGCCGTCTTCGT
G6PD|NM_000402|2520	1126	2539	G6PD	NM_000402	2520	TAGAAGACGCACCGGGCTGGTGAAGAGGGTGGGTTTGTTAATATTCATAGCAAACCCACTCTCTTCATCAGCTTTTTTGGCAAGCAAAAGACGGCATACGAGATACGTGTACCATGCAACGTTTCGCCGTCTTCGT
G6PD|NM_000402|2521	1127	2539	G6PD	NM_000402	2521	TAGAAGACGCACCGGGTCGTTCTTTATGTGGAGAATGTTAATATTCATAGCATTCTCCACATAGAGGACGACTTTTTTGGCAAGCAAAAGACGGCATACGAGATTGGTGTACCATGCAACCATTCGCCGTCTTCGT
G6PD|NM_000402|2522	1128	2539	G6PD	NM_000402	2522	TAGAAGACGCACCGGCCATCAGTTGGATACACATATGTTAATATTCATAGCATGTGTGTATCCGACTGATGGTTTTTTGGCAAGCAAAAGACGGCATACGAGATCAGTGTACCATGCAACACTTCGCCGTCTTCGT
G6PD|NM_000402|2523	1129	2539	G6PD	NM_000402	2523	TAGAAGACGCACCGGTGCGTTATCCTTACCTTTAAGGTTAATATTCATAGCCTTGAAGGTGAGGATAACGCATTTTTTGGCAAGCAAAAGACGGCATACGAGATGTGTGTACCATGCAACTGTTCGCCGTCTTCGT
G6PD|NM_000402|2524	1130	2539	G6PD	NM_000402	2524	TAGAAGACGCACCGGGATGAATTTGGGATTATCTGGGTTAATATTCATAGCCCGGATGATCCCAAATTCATCTTTTTTGGCAAGCAAAAGACGGCATACGAGATTGGTGTACCATGCATGGTTTCGCCGTCTTCGT
GABPA|NM_001197297|2525	1131	2551	GABPA	NM_001197297	2525	TAGAAGACGCACCGGCGAGGATTTCAGGGGAAGGTAGTTAATATTCATAGCTATCTTCTCCTGAAATCCTCGTTTTTTGGCAAGCAAAAGACGGCATACGAGATGTGTGTACCATGCATGCATTCGCCGTCTTCGT
GABPA|NM_001197297|2526	1132	2551	GABPA	NM_001197297	2526	TAGAAGACGCACCGGGCTAGAACTTCTTACTGATAAGTTAATATTCATAGCTTATCAGTAAGAAGTTCTAGCTTTTTTGGCAAGCAAAAGACGGCATACGAGATACGTGTACCATGCATGACTTCGCCGTCTTCGT
GABPA|NM_001197297|2527	1133	2551	GABPA	NM_001197297	2527	TAGAAGACGCACCGGGCTACACCTACTACTATTAAAGTTAATATTCATAGCTTTAATGGTAGTAGGTGTAGCTTTTTTGGCAAGCAAAAGACGGCATACGAGATCAGTGTACCATGCATGTGTTCGCCGTCTTCGT
GABPA|NM_001197297|2528	1134	2551	GABPA	NM_001197297	2528	TAGAAGACGCACCGGATGAACCAATAGGCAATTTAAGTTAATATTCATAGCTTAAATTGCCTATTGGTTCATTTTTTTGGCAAGCAAAAGACGGCATACGAGATTGGTGTACCATGACGTGTTTCGCCGTCTTCGT
GABPA|NM_001197297|2529	1135	2551	GABPA	NM_001197297	2529	TAGAAGACGCACCGGAGCTTAGTGTACAGGTAATTTGTTAATATTCATAGCAAATTACCTGTACACTAAGCTTTTTTTGGCAAGCAAAAGACGGCATACGAGATGTGTGTACCATGACGTCATTCGCCGTCTTCGT
GABPA|NM_001197297|2530	1136	2551	GABPA	NM_001197297	2530	TAGAAGACGCACCGGACCTCACCACACTCAATATTTGTTAATATTCATAGCAAATGTTGAGTGTGGTGAGGTTTTTTTGGCAAGCAAAAGACGGCATACGAGATACGTGTACCATGACGTACTTCGCCGTCTTCGT
GABPA|NM_001197297|2531	1137	2551	GABPA	NM_001197297	2531	TAGAAGACGCACCGGGAAGAAGCTCAAGTGATAATTGTTAATATTCATAGCAGTTATCACTTGAGCTTCTTCTTTTTTGGCAAGCAAAAGACGGCATACGAGATCAGTGTACCATGACGTTGTTCGCCGTCTTCGT
GABPA|NM_001197297|2532	1138	2551	GABPA	NM_001197297	2532	TAGAAGACGCACCGGAAAGATGCAGCTCTATGGAATGTTAATATTCATAGCATTCCATGGAGCTGCATCTTTTTTTTTGGCAAGCAAAAGACGGCATACGAGATGTGTGTACCATGACCAGTTTCGCCGTCTTCGT
GABRG3|NM_033223|2533	1139	2567	GABRG3	NM_033223	2533	TAGAAGACGCACCGGCCAGAAATTATGGTGGCTTTAGTTAATATTCATAGCTAAAGCCGCCATGATTTCTGGTTTTTTGGCAAGCAAAAGACGGCATACGAGATCAGTGTACCATGACCACATTCGCCGTCTTCGT
GABRG3|NM_033223|2534	1140	2567	GABRG3	NM_033223	2534	TAGAAGACGCACCGGCCTTCGATTCAACAGCATAATGTTAATATTCATAGCATTGTGCTGTTGAATCGAAGGTTTTTTGGCAAGCAAAAGACGGCATACGAGATTGGTGTACCATGACCAACTTCGCCGTCTTCGT
GABRG3|NM_033223|2535	1141	2567	GABRG3	NM_033223	2535	TAGAAGACGCACCGGGCTGCTATGAAGAATGTAAATGTTAATATTCATAGCATTTACATTCTTCATAGCAGCTTTTTTGGCAAGCAAAAGACGGCATACGAGATACGTGTACCATGACCATGTTCGCCGTCTTCGT
GABRG3|NM_033223|2536	1142	2567	GABRG3	NM_033223	2536	TAGAAGACGCACCGGTGTTCTGCTGTTATGAAGAATGTTAATATTCATAGCATTCTTCATAGCAGCAGAAGATTTTTTGGCAAGCAAAAGACGGCATACGAGATCAGTGTACCATGACACGTTTCGCCGTCTTCGT
GABRG3|NM_033223|2537	1143	2567	GABRG3	NM_033223	2537	TAGAAGACGCACCGGTGGCTATCCTAAAGAAGAAATGTTAATATTCATAGCATTTCTTCTTTGGGATAGCCATTTTTTGGCAAGCAAAAGACGGCATACGAGATACGTGTACCATGACACCATTCGCCGTCTTCGT
GABRG3|NM_033223|2538	1144	2567	GABRG3	NM_033223	2538	TAGAAGACGCACCGGCCTCAGAAACACCATAGAAATGTTAATATTCATAGCATTTCTGTGGTGTTTCTGAGGTTTTTTGGCAAGCAAAAGACGGCATACGAGATGTGTGTACCATGACACACTTCGCCGTCTTCGT
GABRG3|NM_033223|2539	1145	2567	GABRG3	NM_033223	2539	TAGAAGACGCACCGGGGTCCTGTGTCATTAATAAACGTTAATATTCATAGCGTTTATTGATGACACAGGACCTTTTTTGGCAAGCAAAAGACGGCATACGAGATTGGTGTACCATGACACTGTTCGCCGTCTTCGT
GABRG3|NM_033223|2540	1146	2567	GABRG3	NM_033223	2540	TAGAAGACGCACCGGGACACTGACGTGATTCTTATTGTTAATATTCATAGCAATAAGAGTCACGTCGGTGTCTTTTTTGGCAAGCAAAAGACGGCATACGAGATACGTGTACCATGACTGGTTTCGCCGTCTTCGT
GALC|NM_000153|2541	1147	2581	GALC	NM_000153	2541	TAGAAGACGCACCGGGCCCTATCGTTCTTAGATATTGTTAATATTCATAGCAATATCTGAGAACGATAGGGCTTTTTTGGCAAGCAAAAGACGGCATACGAGATTGGTGTACCATGACTGCATTCGCCGTCTTCGT
GALC|NM_000153|2542	1148	2581	GALC	NM_000153	2542	TAGAAGACGCACCGGGCCCTTCCTAAGTACTTATAAGTTAATATTCATAGCTTATAGGTACTTGGGAAGGGCTTTTTTGGCAAGCAAAAGACGGCATACGAGATCAGTGTACCATGACTGACTTCGCCGTCTTCGT
GALC|NM_000153|2543	1149	2581	GALC	NM_000153	2543	TAGAAGACGCACCGGCCTCCCGATTTCTAGTAAATTGTTAATATTCATAGCAATTTACTAGAAGTCGGGAGGTTTTTTGGCAAGCAAAAGACGGCATACGAGATGTGTGTACCATGACTGTGTTCGCCGTCTTCGT
GALC|NM_000153|2544	1150	2581	GALC	NM_000153	2544	TAGAAGACGCACCGGCGTTAACTATTAAGGGTCATTGTTAATATTCATAGCAATGACCCTTAATAGTTAACGTTTTTTGGCAAGCAAAAGACGGCATACGAGATACGTGTACCATGTGGTGTTTCGCCGTCTTCGT
GALC|NM_000153|2545	1151	2581	GALC	NM_000153	2545	TAGAAGACGCACCGGCAAGTCTTTGTGGACAGATATGTTAATATTCATAGCATGTCTGTCCACAGAGACTTGTTTTTTGGCAAGCAAAAGACGGCATACGAGATTGGTGTACCATGTGGTCATTCGCCGTCTTCGT
GALC|NM_000153|2546	1152	2581	GALC	NM_000153	2546	TAGAAGACGCACCGGGAGAGGTCATATAATGTCAATGTTAATATTCATAGCATTGGCATTATATGACCTCTCTTTTTTGGCAAGCAAAAGACGGCATACGAGATCAGTGTACCATGTGGTACTTCGCCGTCTTCGT
GALC|NM_000153|2547	1153	2581	GALC	NM_000153	2547	TAGAAGACGCACCGGGATTAGAAGTGCTAGAGGAATGTTAATATTCATAGCATTCCTCTGGCACTTCTAATCTTTTTTGGCAAGCAAAAGACGGCATACGAGATGTGTGTACCATGTGGTTGTTCGCCGTCTTCGT
SULT4A1|NM_014351|2548	1154	25830	SULT4A1	NM_014351	2548	TAGAAGACGCACCGGCGATGAGATTGGTTTGATGAAGTTAATATTCATAGCTTCATCAAGCCGATCTCATCGTTTTTTGGCAAGCAAAAGACGGCATACGAGATTGGTGTACCATGTGCAGTTTCGCCGTCTTCGT
SULT4A1|NM_014351|2549	1155	25830	SULT4A1	NM_014351	2549	TAGAAGACGCACCGGGGAGACTCTAAGGTCATTTATGTTAATATTCATAGCATAGATGACCTTGGAGTCTCCTTTTTTGGCAAGCAAAAGACGGCATACGAGATGTGTGTACCATGTGCACATTCGCCGTCTTCGT
SULT4A1|NM_014351|2550	1156	25830	SULT4A1	NM_014351	2550	TAGAAGACGCACCGGGATCTGGTGGTGTCTTGTTGTGTTAATATTCATAGCATAATAAGACACCACCAGATCTTTTTTGGCAAGCAAAAGACGGCATACGAGATACGTGTACCATGTGCAACTTCGCCGTCTTCGT
SULT4A1|NM_014351|2551	1157	25830	SULT4A1	NM_014351	2551	TAGAAGACGCACCGGGGAGTTCGAGAGTAAGTATTTGTTAATATTCATAGCAAGTACTTGCTCTCGAACTCCTTTTTTGGCAAGCAAAAGACGGCATACGAGATCAGTGTACCATGTGCATGTTCGCCGTCTTCGT
SULT4A1|NM_014351|2552	1158	25830	SULT4A1	NM_014351	2552	TAGAAGACGCACCGGAGACTCCAAGGTCATTTATATGTTAATATTCATAGCATATAGATGACCTTGGAGTCTTTTTTTGGCAAGCAAAAGACGGCATACGAGATGTGTGTACCATGTGACGTTTCGCCGTCTTCGT
SULT4A1|NM_014351|2553	1159	25830	SULT4A1	NM_014351	2553	TAGAAGACGCACCGGAAGGATTTGGTGGTGTCTTATGTTAATATTCATAGCATAAGACACCACCAGATCCTTTTTTTTGGCAAGCAAAAGACGGCATACGAGATCAGTGTACCATGTGACCATTCGCCGTCTTCGT
SULT4A1|NM_014351|2554	1160	25830	SULT4A1	NM_014351	2554	TAGAAGACGCACCGGGATGAGATCGGTTTGATGAATGTTAATATTCATAGCGTTCATCAAGCCGATCTCATCTTTTTTGGCAAGCAAAAGACGGCATACGAGATTGGTGTACCATGTGACACTTCGCCGTCTTCGT
SULT4A1|NM_014351|2555	1161	25830	SULT4A1	NM_014351	2555	TAGAAGACGCACCGGGACTTGGTGTATAAATAGAAGGTTAATATTCATAGCCTTCTGTTTATACACCAAGTCTTTTTTGGCAAGCAAAAGACGGCATACGAGATACGTGTACCATGTGACTGTTCGCCGTCTTCGT
LETMD1|NM_001243689|2556	1162	25875	LETMD1	NM_001243689	2556	TAGAAGACGCACCGGCGCATATTGGTGGAGATGGGTGTTAATATTCATAGCACCTATCTTCACCAATATGCGTTTTTTGGCAAGCAAAAGACGGCATACGAGATCAGTGTACCATGTGTGGTTTCGCCGTCTTCGT
LETMD1|NM_001243689|2557	1163	25875	LETMD1	NM_001243689	2557	TAGAAGACGCACCGGGATGGAGCATTTGAGATAGTTGTTAATATTCATAGCAACTGTCTCAAATGCTCCATCTTTTTTGGCAAGCAAAAGACGGCATACGAGATACGTGTACCATGTGTGCATTCGCCGTCTTCGT
LETMD1|NM_001243689|2558	1164	25875	LETMD1	NM_001243689	2558	TAGAAGACGCACCGGGACAAATATGTGGAAGTACAAGTTAATATTCATAGCTTGTGCTTCCACATATTTGTCTTTTTTGGCAAGCAAAAGACGGCATACGAGATGTGTGTACCATGTGTGACTTCGCCGTCTTCGT
LETMD1|NM_001243689|2559	1165	25875	LETMD1	NM_001243689	2559	TAGAAGACGCACCGGGCTTCTATATCCTGTATACAAGTTAATATTCATAGCTTGTGTACAGGATATAGAAGCTTTTTTGGCAAGCAAAAGACGGCATACGAGATTGGTGTACCATGTGTGTGTTCGCCGTCTTCGT
LETMD1|NM_001243689|2560	1166	25875	LETMD1	NM_001243689	2560	TAGAAGACGCACCGGGGTGAAGATAGGTGTTGAATTGTTAATATTCATAGCAGTTCGACACCTATCTTCACCTTTTTTGGCAAGCAAAAGACGGCATACGAGATCAGTGTACACGTGTGTGTTTCGCCGTCTTCGT
LETMD1|NM_001243689|2561	1167	25875	LETMD1	NM_001243689	2561	TAGAAGACGCACCGGGCAGTTCCACCTAGAAATTATGTTAATATTCATAGCATAATTTCTGGGTGGGACTGCTTTTTTGGCAAGCAAAAGACGGCATACGAGATACGTGTACACGTGTGTCATTCGCCGTCTTCGT
LETMD1|NM_001243689|2562	1168	25875	LETMD1	NM_001243689	2562	TAGAAGACGCACCGGGCGATTAATGGGAAATATCATGTTAATATTCATAGCATGGTATTTCCCATTAATCGCTTTTTTGGCAAGCAAAAGACGGCATACGAGATGTGTGTACACGTGTGTACTTCGCCGTCTTCGT
AMBP|NM_001633|2563	1169	259	AMBP	NM_001633	2563	TAGAAGACGCACCGGGCCATTATGGACCCACTATTAGTTAATATTCATAGCTAATGGTGGGTCCATGATGGCTTTTTTGGCAAGCAAAAGACGGCATACGAGATTGGTGTACACGTGTGTTGTTCGCCGTCTTCGT
AMBP|NM_001633|2564	1170	259	AMBP	NM_001633	2564	TAGAAGACGCACCGGAGGAACTAGAGCCTATCTTAAGTTAATATTCATAGCTTAAGATGGGCTCTGGTTCCTTTTTTTGGCAAGCAAAAGACGGCATACGAGATACGTGTACACGTGTCAGTTTCGCCGTCTTCGT
AMBP|NM_001633|2565	1171	259	AMBP	NM_001633	2565	TAGAAGACGCACCGGGAAGTCACTAAGAAAGAAGATGTTAATATTCATAGCATCTTCTTTCTTGGTGACTTCTTTTTTGGCAAGCAAAAGACGGCATACGAGATTGGTGTACACGTGTCACATTCGCCGTCTTCGT
AMBP|NM_001633|2566	1172	259	AMBP	NM_001633	2566	TAGAAGACGCACCGGGTAACAACTTCGTCATAGAAAGTTAATATTCATAGCTTTCTGTGACGAAGTTGTTACTTTTTTGGCAAGCAAAAGACGGCATACGAGATCAGTGTACACGTGTCAACTTCGCCGTCTTCGT
AMBP|NM_001633|2567	1173	259	AMBP	NM_001633	2567	TAGAAGACGCACCGGGGAACTAGAGCCTATCTTAATGTTAATATTCATAGCATTAAGATGGGCTCTGGTTCCTTTTTTGGCAAGCAAAAGACGGCATACGAGATGTGTGTACACGTGTCATGTTCGCCGTCTTCGT
AMBP|NM_001633|2568	1174	259	AMBP	NM_001633	2568	TAGAAGACGCACCGGTGGGTATTTGATGCTGTTAAGGTTAATATTCATAGCCTTGACAGCATCAAATGCCCATTTTTTGGCAAGCAAAAGACGGCATACGAGATTGGTGTACACGTGTACGTTTCGCCGTCTTCGT
AMBP|NM_001633|2569	1175	259	AMBP	NM_001633	2569	TAGAAGACGCACCGGACCATTACTGCTAAGCTTTACGTTAATATTCATAGCGTAGAGCTTGGCAGTAATGGTTTTTTTGGCAAGCAAAAGACGGCATACGAGATGTGTGTACACGTGTACCATTCGCCGTCTTCGT
AMBP|NM_001633|2570	1176	259	AMBP	NM_001633	2570	TAGAAGACGCACCGGGTAACTGAAGTCACTAAGAAAGTTAATATTCATAGCTTTCTTGGTGACTTCAGTTACTTTTTTGGCAAGCAAAAGACGGCATACGAGATACGTGTACACGTGTACACTTCGCCGTCTTCGT
GALNT3|NM_004482|2571	1177	2591	GALNT3	NM_004482	2571	TAGAAGACGCACCGGGCTCTATTCTTCACCTGTAATGTTAATATTCATAGCATTGCAGGTGAAGAATAGAGCTTTTTTGGCAAGCAAAAGACGGCATACGAGATCAGTGTACACGTGTACTGTTCGCCGTCTTCGT
GALNT3|NM_004482|2572	1178	2591	GALNT3	NM_004482	2572	TAGAAGACGCACCGGCCAGACCTTAATCTTGTTATAGTTAATATTCATAGCTATAACAGGATTAAGGTCTGGTTTTTTGGCAAGCAAAAGACGGCATACGAGATGTGTGTACACGTGTTGGTTTCGCCGTCTTCGT
GALNT3|NM_004482|2573	1179	2591	GALNT3	NM_004482	2573	TAGAAGACGCACCGGGCTCATTGTGAGTGTTTCTATGTTAATATTCATAGCATAGAAACACTCACAGTGAGCTTTTTTGGCAAGCAAAAGACGGCATACGAGATCAGTGTACACGTGTTGCATTCGCCGTCTTCGT
GALNT3|NM_004482|2574	1180	2591	GALNT3	NM_004482	2574	TAGAAGACGCACCGGGCTGTCGTAAGTCTAGATATTGTTAATATTCATAGCAATATCTGGACTTACGACAGCTTTTTTGGCAAGCAAAAGACGGCATACGAGATTGGTGTACACGTGTTGACTTCGCCGTCTTCGT
GALNT3|NM_004482|2575	1181	2591	GALNT3	NM_004482	2575	TAGAAGACGCACCGGGCAGAATTGAAGTCTGTCTTTGTTAATATTCATAGCAAGGACAGGCTTCAATTCTGCTTTTTTGGCAAGCAAAAGACGGCATACGAGATACGTGTACACGTGTTGTGTTCGCCGTCTTCGT
GALNT3|NM_004482|2576	1182	2591	GALNT3	NM_004482	2576	TAGAAGACGCACCGGGCAAATGGAGAGTATCTAAGTGTTAATATTCATAGCACTTGGATGCTCTCCATTTGCTTTTTTGGCAAGCAAAAGACGGCATACGAGATGTGTGTACACGTCAGTGTTTCGCCGTCTTCGT
GALNT3|NM_004482|2577	1183	2591	GALNT3	NM_004482	2577	TAGAAGACGCACCGGGGTGATTGCTAGAAACTAAGTGTTAATATTCATAGCACTTGGTTTCTAGCAATCACCTTTTTTGGCAAGCAAAAGACGGCATACGAGATCAGTGTACACGTCAGTCATTCGCCGTCTTCGT
GALNT3|NM_004482|2578	1184	2591	GALNT3	NM_004482	2578	TAGAAGACGCACCGGAGACCTTGTTTGTAAGGATATGTTAATATTCATAGCATATCCTTGCAAACAAGGTCTTTTTTTGGCAAGCAAAAGACGGCATACGAGATTGGTGTACACGTCAGTACTTCGCCGTCTTCGT
HSPA12A|NM_025015|2579	1185	259217	HSPA12A	NM_025015	2579	TAGAAGACGCACCGGTTACTGGAGGGACACTTTAAGGTTAATATTCATAGCCTTAAGGTGTCCCTCCGGTAATTTTTTGGCAAGCAAAAGACGGCATACGAGATACGTGTACACGTCAGTTGTTCGCCGTCTTCGT
HSPA12A|NM_025015|2580	1186	259217	HSPA12A	NM_025015	2580	TAGAAGACGCACCGGGGAGAATGTTATAGGAGAAATGTTAATATTCATAGCATTTCTCCTATGACATTCTCCTTTTTTGGCAAGCAAAAGACGGCATACGAGATCAGTGTACACGTCACAGTTTCGCCGTCTTCGT
HSPA12A|NM_025015|2581	1187	259217	HSPA12A	NM_025015	2581	TAGAAGACGCACCGGGTTGGGATCGATTTCTTAAATGTTAATATTCATAGCATTTAAGAAGTCGATCCCAACTTTTTTGGCAAGCAAAAGACGGCATACGAGATACGTGTACACGTCACACATTCGCCGTCTTCGT
HSPA12A|NM_025015|2582	1188	259217	HSPA12A	NM_025015	2582	TAGAAGACGCACCGGGTACCTGGAGAAGTTTAAGATGTTAATATTCATAGCATCTTGAACTTCTCCAGGTACTTTTTTGGCAAGCAAAAGACGGCATACGAGATGTGTGTACACGTCACAACTTCGCCGTCTTCGT
HSPA12A|NM_025015|2583	1189	259217	HSPA12A	NM_025015	2583	TAGAAGACGCACCGGTACCATGACTTGGATCCTAATGTTAATATTCATAGCATTGGGATCCAGGTCATGGTATTTTTTGGCAAGCAAAAGACGGCATACGAGATTGGTGTACACGTCACATGTTCGCCGTCTTCGT
HSPA12A|NM_025015|2584	1190	259217	HSPA12A	NM_025015	2584	TAGAAGACGCACCGGTGCAGCTTGGGTTGATTTAATGTTAATATTCATAGCATTAAGTCAACCCAGGCTGCATTTTTTGGCAAGCAAAAGACGGCATACGAGATACGTGTACACGTCAACGTTTCGCCGTCTTCGT
HSPA12A|NM_025015|2585	1191	259217	HSPA12A	NM_025015	2585	TAGAAGACGCACCGGGTCTCAGAACAGCAGTTATTTGTTAATATTCATAGCAAATGACTGCTGTTCTGAGACTTTTTTGGCAAGCAAAAGACGGCATACGAGATTGGTGTACACGTCAACCATTCGCCGTCTTCGT
HSPA12A|NM_025015|2586	1192	259217	HSPA12A	NM_025015	2586	TAGAAGACGCACCGGTATGCCCTGTAGTACTTTAAGGTTAATATTCATAGCCTTAAAGTACTGCAGGGCATATTTTTTGGCAAGCAAAAGACGGCATACGAGATCAGTGTACACGTCAACACTTCGCCGTCTTCGT
ZNF521|NM_015461|2587	1193	25925	ZNF521	NM_015461	2587	TAGAAGACGCACCGGGCCCTCACTCTATAACTTAAAGTTAATATTCATAGCTTTAGGTTATAGAGTGAGGGCTTTTTTGGCAAGCAAAAGACGGCATACGAGATGTGTGTACACGTCAACTGTTCGCCGTCTTCGT
ZNF521|NM_015461|2588	1194	25925	ZNF521	NM_015461	2588	TAGAAGACGCACCGGGCATCAAGTGTTAGATGGTTTGTTAATATTCATAGCAAACCATCTGACACTTGATGCTTTTTTGGCAAGCAAAAGACGGCATACGAGATTGGTGTACACGTCATGGTTTCGCCGTCTTCGT
ZNF521|NM_015461|2589	1195	25925	ZNF521	NM_015461	2589	TAGAAGACGCACCGGACGTCCAACAAGCTATATAAAGTTAATATTCATAGCTTTATATGGCTTGTTGGACGTTTTTTTGGCAAGCAAAAGACGGCATACGAGATGTGTGTACACGTCATGCATTCGCCGTCTTCGT
ZNF521|NM_015461|2590	1196	25925	ZNF521	NM_015461	2590	TAGAAGACGCACCGGGTGACAAACTGTCTTTCAAATGTTAATATTCATAGCATTTGAAAGGCAGTTTGTCACTTTTTTGGCAAGCAAAAGACGGCATACGAGATACGTGTACACGTCATGACTTCGCCGTCTTCGT
ZNF521|NM_015461|2591	1197	25925	ZNF521	NM_015461	2591	TAGAAGACGCACCGGGAAACTGACTTGTAGCTCTATGTTAATATTCATAGCATGGAGCTGCAAGTCAGTTTCTTTTTTGGCAAGCAAAAGACGGCATACGAGATCAGTGTACACGTCATGTGTTCGCCGTCTTCGT
ZNF521|NM_015461|2592	1198	25925	ZNF521	NM_015461	2592	TAGAAGACGCACCGGGGTTCATGTTGCAAATTACATGTTAATATTCATAGCATGTGATTTGCAACATGAACCTTTTTTGGCAAGCAAAAGACGGCATACGAGATTGGTGTACACGTACGTGTTTCGCCGTCTTCGT
ZNF521|NM_015461|2593	1199	25925	ZNF521	NM_015461	2593	TAGAAGACGCACCGGCAAGCAAGATCTGGTGAAATTGTTAATATTCATAGCAGTTTCACCAGATCTTGCTTGTTTTTTGGCAAGCAAAAGACGGCATACGAGATGTGTGTACACGTACGTCATTCGCCGTCTTCGT
ZNF521|NM_015461|2594	1200	25925	ZNF521	NM_015461	2594	TAGAAGACGCACCGGGTGTCCAGTTTGCTTTATAGTGTTAATATTCATAGCACTGTAAAGCAGACTGGACACTTTTTTGGCAAGCAAAAGACGGCATACGAGATACGTGTACACGTACGTACTTCGCCGTCTTCGT
WWTR1|NM_001168278|2595	1201	25937	WWTR1	NM_001168278	2595	TAGAAGACGCACCGGGCGATGAATTAGCCTTTGAATGTTAATATTCATAGCATTCAGAGGCTGATTCATCGCTTTTTTGGCAAGCAAAAGACGGCATACGAGATCAGTGTACACGTACGTTGTTCGCCGTCTTCGT
WWTR1|NM_001168278|2596	1202	25937	WWTR1	NM_001168278	2596	TAGAAGACGCACCGGCAGCCAAATCTTGTGATGAATGTTAATATTCATAGCATTCATCACGAGATTTGGCTGTTTTTTGGCAAGCAAAAGACGGCATACGAGATGTGTGTACACGTACCAGTTTCGCCGTCTTCGT
WWTR1|NM_001168278|2597	1203	25937	WWTR1	NM_001168278	2597	TAGAAGACGCACCGGGAAACTGTGGCTTTAGAGAATGTTAATATTCATAGCATTCTCTGAAGCCGCAGTTTCTTTTTTGGCAAGCAAAAGACGGCATACGAGATCAGTGTACACGTACCACATTCGCCGTCTTCGT
WWTR1|NM_001168278|2598	1204	25937	WWTR1	NM_001168278	2598	TAGAAGACGCACCGGGGAGAGAGAAAGGATTTGAATGTTAATATTCATAGCATTCGAATCCTTTCTCTCTCCTTTTTTGGCAAGCAAAAGACGGCATACGAGATTGGTGTACACGTACCAACTTCGCCGTCTTCGT
WWTR1|NM_001168278|2599	1205	25937	WWTR1	NM_001168278	2599	TAGAAGACGCACCGGGACATGAGATCCATCATTAATGTTAATATTCATAGCATTAGTGATGGATCTCATGTCTTTTTTGGCAAGCAAAAGACGGCATACGAGATACGTGTACACGTACCATGTTCGCCGTCTTCGT
WWTR1|NM_001168278|2600	1206	25937	WWTR1	NM_001168278	2600	TAGAAGACGCACCGGGTAGAGTCTGCTCTGAATAAAGTTAATATTCATAGCTTTGTTCAGAGCAGACTCTACTTTTTTGGCAAGCAAAAGACGGCATACGAGATCAGTGTACACGTACACGTTTCGCCGTCTTCGT
WWTR1|NM_001168278|2601	1207	25937	WWTR1	NM_001168278	2601	TAGAAGACGCACCGGATGGCAGTATTCCAGCTAAATGTTAATATTCATAGCATTTGGCTGGGATACTGCCATTTTTTTGGCAAGCAAAAGACGGCATACGAGATACGTGTACACGTACACCATTCGCCGTCTTCGT
WWTR1|NM_001168278|2602	1208	25937	WWTR1	NM_001168278	2602	TAGAAGACGCACCGGATATCATTTGAGGGAGTAGAGGTTAATATTCATAGCCTCTGCTCCCTCGAATGATATTTTTTTGGCAAGCAAAAGACGGCATACGAGATGTGTGTACACGTACACACTTCGCCGTCTTCGT
SAMHD1|NM_015474|2603	1209	25939	SAMHD1	NM_015474	2603	TAGAAGACGCACCGGGCCAGTGTTAAACCTAAAGTAGTTAATATTCATAGCTACTTTGGGTTTAGCACTGGCTTTTTTGGCAAGCAAAAGACGGCATACGAGATTGGTGTACACGTACACTGTTCGCCGTCTTCGT
SAMHD1|NM_015474|2604	1210	25939	SAMHD1	NM_015474	2604	TAGAAGACGCACCGGGCCATCATCTTGGAATTCAAAGTTAATATTCATAGCTTTGGATTCCAAGATGATGGCTTTTTTGGCAAGCAAAAGACGGCATACGAGATACGTGTACACGTACTGGTTTCGCCGTCTTCGT
SAMHD1|NM_015474|2605	1211	25939	SAMHD1	NM_015474	2605	TAGAAGACGCACCGGCAGAGCAATCAGGATTATTAAGTTAATATTCATAGCTTAGTAATCCTGATTGCTCTGTTTTTTGGCAAGCAAAAGACGGCATACGAGATTGGTGTACACGTACTGCATTCGCCGTCTTCGT
SAMHD1|NM_015474|2606	1212	25939	SAMHD1	NM_015474	2606	TAGAAGACGCACCGGGCTTAGTTATATCCAGTGATTGTTAATATTCATAGCAATCGCTGGATATAACTAAGCTTTTTTGGCAAGCAAAAGACGGCATACGAGATCAGTGTACACGTACTGACTTCGCCGTCTTCGT
SAMHD1|NM_015474|2607	1213	25939	SAMHD1	NM_015474	2607	TAGAAGACGCACCGGGCAGATGACTATATAGAGATTGTTAATATTCATAGCAATCTCTATGTAGTCATCTGCTTTTTTGGCAAGCAAAAGACGGCATACGAGATGTGTGTACACGTACTGTGTTCGCCGTCTTCGT
SAMHD1|NM_015474|2608	1214	25939	SAMHD1	NM_015474	2608	TAGAAGACGCACCGGGCCTATACTAAGCTGATAGATGTTAATATTCATAGCATCTGTCAGCTTAGTATAGGCTTTTTTGGCAAGCAAAAGACGGCATACGAGATACGTGTACACGTTGGTGTTTCGCCGTCTTCGT
SAMHD1|NM_015474|2609	1215	25939	SAMHD1	NM_015474	2609	TAGAAGACGCACCGGAAGCCTGTCATGGAATAATATGTTAATATTCATAGCATATTGTTCCATGACAGGCTTTTTTTTGGCAAGCAAAAGACGGCATACGAGATTGGTGTACACGTTGGTCATTCGCCGTCTTCGT
SAMHD1|NM_015474|2610	1216	25939	SAMHD1	NM_015474	2610	TAGAAGACGCACCGGATGGCATTGATGTGGATAAATGTTAATATTCATAGCATTTGTCCACATCAATGCCATTTTTTTGGCAAGCAAAAGACGGCATACGAGATCAGTGTACACGTTGGTACTTCGCCGTCTTCGT
GAPDH|NM_001256799|2611	1217	2597	GAPDH	NM_001256799	2611	TAGAAGACGCACCGGTCCGGGAAATTGTGGTGTGATGTTAATATTCATAGCATCACGCCACAGTTTCCCGGATTTTTTGGCAAGCAAAAGACGGCATACGAGATGTGTGTACACGTTGGTTGTTCGCCGTCTTCGT
GAPDH|NM_001256799|2612	1218	2597	GAPDH	NM_001256799	2612	TAGAAGACGCACCGGATGATTCCACCCATGGTAAATGTTAATATTCATAGCATTTGCCATGGGTGGAATCATTTTTTTGGCAAGCAAAAGACGGCATACGAGATTGGTGTACACGTTGCAGTTTCGCCGTCTTCGT
GAPDH|NM_001256799|2613	1219	2597	GAPDH	NM_001256799	2613	TAGAAGACGCACCGGGAAGCTTGTCATTAATGGAAAGTTAATATTCATAGCTTTCCATTGATGACAAGCTTCTTTTTTGGCAAGCAAAAGACGGCATACGAGATGTGTGTACACGTTGCACATTCGCCGTCTTCGT
GAPDH|NM_001256799|2614	1220	2597	GAPDH	NM_001256799	2614	TAGAAGACGCACCGGCCAAGGTCATCTATGACAATTGTTAATATTCATAGCAGTTGTCATGGATGACCTTGGTTTTTTGGCAAGCAAAAGACGGCATACGAGATACGTGTACACGTTGCAACTTCGCCGTCTTCGT
GAPDH|NM_001256799|2615	1221	2597	GAPDH	NM_001256799	2615	TAGAAGACGCACCGGTGGTCTCCTCTGATTTCAATAGTTAATATTCATAGCTGTTGAAGTCAGAGGAGACCATTTTTTGGCAAGCAAAAGACGGCATACGAGATCAGTGTACACGTTGCATGTTCGCCGTCTTCGT
GAPDH|NM_001256799|2616	1222	2597	GAPDH	NM_001256799	2616	TAGAAGACGCACCGGAACGGGAAGCTTGTCATTAATGTTAATATTCATAGCATTGATGACAAGCTTCCCGTTTTTTTTGGCAAGCAAAAGACGGCATACGAGATGTGTGTACACGTTGACGTTTCGCCGTCTTCGT
GAPDH|NM_001256799|2617	1223	2597	GAPDH	NM_001256799	2617	TAGAAGACGCACCGGTGATTCCACCCATGGTAAATTGTTAATATTCATAGCAATTTGCCATGGGTGGAATCATTTTTTGGCAAGCAAAAGACGGCATACGAGATCAGTGTACACGTTGACCATTCGCCGTCTTCGT
GAPDH|NM_001256799|2618	1224	2597	GAPDH	NM_001256799	2618	TAGAAGACGCACCGGGCCAAATATGATGACATTAAGGTTAATATTCATAGCCTTGATGTCATCATATTTGGCTTTTTTGGCAAGCAAAAGACGGCATACGAGATTGGTGTACACGTTGACACTTCGCCGTCTTCGT
REXO2|NM_015523|2619	1225	25996	REXO2	NM_015523	2619	TAGAAGACGCACCGGGCACTTGATGATATTAGTGAAGTTAATATTCATAGCTTCACTAATGTCATCAAGTGCTTTTTTGGCAAGCAAAAGACGGCATACGAGATACGTGTACACGTTGACTGTTCGCCGTCTTCGT
REXO2|NM_015523|2620	1226	25996	REXO2	NM_015523	2620	TAGAAGACGCACCGGGCAGTGAAGGAGAGTATAATTGTTAATATTCATAGCAATTGTACTCTCCTTCACTGCTTTTTTGGCAAGCAAAAGACGGCATACGAGATCAGTGTACACGTTGTGGTTTCGCCGTCTTCGT
REXO2|NM_015523|2621	1227	25996	REXO2	NM_015523	2621	TAGAAGACGCACCGGCCGAAATAACATCTTCAAGAAGTTAATATTCATAGCTTCTTGAAGATGTTATTTCGGTTTTTTGGCAAGCAAAAGACGGCATACGAGATACGTGTACACGTTGTGCATTCGCCGTCTTCGT
REXO2|NM_015523|2622	1228	25996	REXO2	NM_015523	2622	TAGAAGACGCACCGGCTGACTCTGATCTCAATATTTGTTAATATTCATAGCAAATGTTGAGATCAGAGTCAGTTTTTTGGCAAGCAAAAGACGGCATACGAGATGTGTGTACACGTTGTGACTTCGCCGTCTTCGT
REXO2|NM_015523|2623	1229	25996	REXO2	NM_015523	2623	TAGAAGACGCACCGGGCAGGAAATTCAGTTTATGAAGTTAATATTCATAGCTTCATGAACTGAATTTCCTGCTTTTTTGGCAAGCAAAAGACGGCATACGAGATTGGTGTACACGTTGTGTGTTCGCCGTCTTCGT
REXO2|NM_015523|2624	1230	25996	REXO2	NM_015523	2624	TAGAAGACGCACCGGGACGTTGGTATCTAGAAGAATGTTAATATTCATAGCATTCTTCTGGATACCAGCGTCTTTTTTGGCAAGCAAAAGACGGCATACGAGATGTGTGTACACCAGTGTGTTTCGCCGTCTTCGT
REXO2|NM_015523|2625	1231	25996	REXO2	NM_015523	2625	TAGAAGACGCACCGGGCTTCTTATAGGGCATTTGATGTTAATATTCATAGCATCAAGTGCCCTATGAGAAGCTTTTTTGGCAAGCAAAAGACGGCATACGAGATCAGTGTACACCAGTGTCATTCGCCGTCTTCGT
REXO2|NM_015523|2626	1232	25996	REXO2	NM_015523	2626	TAGAAGACGCACCGGGATGTGAGCATTGTTAAAGAAGTTAATATTCATAGCTTCTTTAACAGTGCTCACATCTTTTTTGGCAAGCAAAAGACGGCATACGAGATTGGTGTACACCAGTGTACTTCGCCGTCTTCGT
AMD1|NM_001033059|2627	1233	262	AMD1	NM_001033059	2627	TAGAAGACGCACCGGGCCAGATCAAACTTTGGAAATGTTAATATTCATAGCATTTCCAAGGTTTGATCTGGCTTTTTTGGCAAGCAAAAGACGGCATACGAGATACGTGTACACCAGTGTTGTTCGCCGTCTTCGT
AMD1|NM_001033059|2628	1234	262	AMD1	NM_001033059	2628	TAGAAGACGCACCGGCGGATGGAACTTATTGGATTAGTTAATATTCATAGCTAGTCCAATAAGTTCCATCCGTTTTTTGGCAAGCAAAAGACGGCATACGAGATCAGTGTACACCAGTCAGTTTCGCCGTCTTCGT
AMD1|NM_001033059|2629	1235	262	AMD1	NM_001033059	2629	TAGAAGACGCACCGGGATGGAACTTATTGGACTATTGTTAATATTCATAGCAATAGTCCAATAAGTTCCATCTTTTTTGGCAAGCAAAAGACGGCATACGAGATACGTGTACACCAGTCACATTCGCCGTCTTCGT
AMD1|NM_001033059|2630	1236	262	AMD1	NM_001033059	2630	TAGAAGACGCACCGGGTCTCCAAGAGATGTTTCATTGTTAATATTCATAGCAATGAAACGTCTCTTGGAGACTTTTTTGGCAAGCAAAAGACGGCATACGAGATGTGTGTACACCAGTCAACTTCGCCGTCTTCGT
AMD1|NM_001033059|2631	1237	262	AMD1	NM_001033059	2631	TAGAAGACGCACCGGTCTGACTGTTGGTACTTATATGTTAATATTCATAGCATATAAGTACCAACAGTCAGATTTTTTGGCAAGCAAAAGACGGCATACGAGATTGGTGTACACCAGTCATGTTCGCCGTCTTCGT
AMD1|NM_001033059|2632	1238	262	AMD1	NM_001033059	2632	TAGAAGACGCACCGGATGTGCAATGTTCAATCATAAGTTAATATTCATAGCTTATGATTGAACATTGCACATTTTTTTGGCAAGCAAAAGACGGCATACGAGATACGTGTACACCAGTACGTTTCGCCGTCTTCGT
AMD1|NM_001033059|2633	1239	262	AMD1	NM_001033059	2633	TAGAAGACGCACCGGCCGGAATTTCTAGGAAGAAATGTTAATATTCATAGCATTTCTTCCTGGAAATTCCGGTTTTTTGGCAAGCAAAAGACGGCATACGAGATTGGTGTACACCAGTACCATTCGCCGTCTTCGT
AMD1|NM_001033059|2634	1240	262	AMD1	NM_001033059	2634	TAGAAGACGCACCGGGTGACCACTTTGTTTGTTAATGTTAATATTCATAGCATTAACAAACAAGGTGGTCACTTTTTTGGCAAGCAAAAGACGGCATACGAGATCAGTGTACACCAGTACACTTCGCCGTCTTCGT
GAS2|NM_001143830|2635	1241	2620	GAS2	NM_001143830	2635	TAGAAGACGCACCGGGAAGATACTGAGTGGGAGAAGGTTAATATTCATAGCTTTCTCCCACTCGGTATCTTCTTTTTTGGCAAGCAAAAGACGGCATACGAGATGTGTGTACACCAGTACTGTTCGCCGTCTTCGT
GAS2|NM_001143830|2636	1242	2620	GAS2	NM_001143830	2636	TAGAAGACGCACCGGCCAGCAGACATGAAGTTAATTGTTAATATTCATAGCAATTAGCTTCATGTCTGCTGGTTTTTTGGCAAGCAAAAGACGGCATACGAGATTGGTGTACACCAGTTGGTTTCGCCGTCTTCGT
GAS2|NM_001143830|2637	1243	2620	GAS2	NM_001143830	2637	TAGAAGACGCACCGGGAAGGAGATTACAGTAGAAACGTTAATATTCATAGCGTTTCTGCTGTAATCTCCTTCTTTTTTGGCAAGCAAAAGACGGCATACGAGATGTGTGTACACCAGTTGCATTCGCCGTCTTCGT
GAS2|NM_001143830|2638	1244	2620	GAS2	NM_001143830	2638	TAGAAGACGCACCGGCTGAAGATCCTCCTTGTAAATGTTAATATTCATAGCATTTGCAAGGAGGATCTTCAGTTTTTTGGCAAGCAAAAGACGGCATACGAGATACGTGTACACCAGTTGACTTCGCCGTCTTCGT
GAS2|NM_001143830|2639	1245	2620	GAS2	NM_001143830	2639	TAGAAGACGCACCGGGTGGTTTCTGCTAGTTATAAGGTTAATATTCATAGCCTTATAACTGGCAGAGACCACTTTTTTGGCAAGCAAAAGACGGCATACGAGATCAGTGTACACCAGTTGTGTTCGCCGTCTTCGT
GAS2|NM_001143830|2640	1246	2620	GAS2	NM_001143830	2640	TAGAAGACGCACCGGTCACCTTCTCCTTCATTAAAGGTTAATATTCATAGCCTTTGATGAAGGAGAAGGTGATTTTTTGGCAAGCAAAAGACGGCATACGAGATTGGTGTACACCACAGTGTTTCGCCGTCTTCGT
GAS2|NM_001143830|2641	1247	2620	GAS2	NM_001143830	2641	TAGAAGACGCACCGGGTGGATGAAACGTGTTTATTTGTTAATATTCATAGCAAATAGACACGTTTCATCCACTTTTTTGGCAAGCAAAAGACGGCATACGAGATGTGTGTACACCACAGTCATTCGCCGTCTTCGT
GAS2|NM_001143830|2642	1248	2620	GAS2	NM_001143830	2642	TAGAAGACGCACCGGGGAGTCTCTTGGTTTGATAAAGTTAATATTCATAGCTTTATCAAACCAGGAGGCTCCTTTTTTGGCAAGCAAAAGACGGCATACGAGATACGTGTACACCACAGTACTTCGCCGTCTTCGT
GATA1|NM_002049|2643	1249	2623	GATA1	NM_002049	2643	TAGAAGACGCACCGGCGGCCTAAGAAGCGCTTGATTGTTAATATTCATAGCAATCAGGCGCTTCTTGGGCCGTTTTTTGGCAAGCAAAAGACGGCATACGAGATCAGTGTACACCACAGTTGTTCGCCGTCTTCGT
GATA1|NM_002049|2644	1250	2623	GATA1	NM_002049	2644	TAGAAGACGCACCGGTGTACCCATTGCTCAATTGTAGTTAATATTCATAGCTACAGTTGAGCAATGGGTACATTTTTTGGCAAGCAAAAGACGGCATACGAGATGTGTGTACACCACACAGTTTCGCCGTCTTCGT
GATA1|NM_002049|2645	1251	2623	GATA1	NM_002049	2645	TAGAAGACGCACCGGCCCTCAATTTAGCAGCTTATTGTTAATATTCATAGCAATAGGCTGCTGAATTGAGGGTTTTTTGGCAAGCAAAAGACGGCATACGAGATCAGTGTACACCACACACATTCGCCGTCTTCGT
GATA1|NM_002049|2646	1252	2623	GATA1	NM_002049	2646	TAGAAGACGCACCGGACCAGTTTCTTGGAGACTTTGGTTAATATTCATAGCCAAAGTCTCCAGGAAGCTGGTTTTTTTGGCAAGCAAAAGACGGCATACGAGATTGGTGTACACCACACAACTTCGCCGTCTTCGT
GATA1|NM_002049|2647	1253	2623	GATA1	NM_002049	2647	TAGAAGACGCACCGGAGCGCCTGATTGTTAGTAAATGTTAATATTCATAGCGTTTACTGACAATCAGGCGCTTTTTTTGGCAAGCAAAAGACGGCATACGAGATACGTGTACACCACACATGTTCGCCGTCTTCGT
GATA1|NM_002049|2648	1254	2623	GATA1	NM_002049	2648	TAGAAGACGCACCGGGATGGTATTCAGACTTGAAACGTTAATATTCATAGCGTTTCGAGTCTGAATACCATCTTTTTTGGCAAGCAAAAGACGGCATACGAGATCAGTGTACACCACAACGTTTCGCCGTCTTCGT
GATA1|NM_002049|2649	1255	2623	GATA1	NM_002049	2649	TAGAAGACGCACCGGGTACCCATTGCTCAATTGTATGTTAATATTCATAGCATACAGTTGAGCAATGGGTACTTTTTTGGCAAGCAAAAGACGGCATACGAGATACGTGTACACCACAACCATTCGCCGTCTTCGT
GATA1|NM_002049|2650	1256	2623	GATA1	NM_002049	2650	TAGAAGACGCACCGGACCATGTGGAAGGATGGTGTTGTTAATATTCATAGCAATACCATCCTTCCGCATGGTTTTTTTGGCAAGCAAAAGACGGCATACGAGATGTGTGTACACCACAACACTTCGCCGTCTTCGT
GATA2|NM_001145661|2651	1257	2624	GATA2	NM_001145661	2651	TAGAAGACGCACCGGGTGCAAATTGTCAGATGACAAGTTAATATTCATAGCTTGTCGTCTGACAATTTGCACTTTTTTGGCAAGCAAAAGACGGCATACGAGATTGGTGTACACCACAACTGTTCGCCGTCTTCGT
GATA2|NM_001145661|2652	1258	2624	GATA2	NM_001145661	2652	TAGAAGACGCACCGGGAACTGGAAGATGTCCAATAAGTTAATATTCATAGCTTGTTGGACATCTTCCGGTTCTTTTTTGGCAAGCAAAAGACGGCATACGAGATACGTGTACACCACATGGTTTCGCCGTCTTCGT
GATA2|NM_001145661|2653	1259	2624	GATA2	NM_001145661	2653	TAGAAGACGCACCGGCGACTACAGTAGCGGATTCTTGTTAATATTCATAGCAAGAGTCCGCTGCTGTAGTCGTTTTTTGGCAAGCAAAAGACGGCATACGAGATTGGTGTACACCACATGCATTCGCCGTCTTCGT
GATA2|NM_001145661|2654	1260	2624	GATA2	NM_001145661	2654	TAGAAGACGCACCGGACTGATGGAGAGTATGAAGATGTTAATATTCATAGCATCTTCATGCTCTCCGTCAGTTTTTTTGGCAAGCAAAAGACGGCATACGAGATCAGTGTACACCACATGACTTCGCCGTCTTCGT
GATA2|NM_001145661|2655	1261	2624	GATA2	NM_001145661	2655	TAGAAGACGCACCGGGACCATGAAGAGGGAAGGGGTGTTAATATTCATAGCATCCCTTCCTTCTTCATGGTCTTTTTTGGCAAGCAAAAGACGGCATACGAGATGTGTGTACACCACATGTGTTCGCCGTCTTCGT
GATA2|NM_001145661|2656	1262	2624	GATA2	NM_001145661	2656	TAGAAGACGCACCGGGCAAATTGTCAGATGACAATCGTTAATATTCATAGCGGTTGTCGTCTGACAATTTGCTTTTTTGGCAAGCAAAAGACGGCATACGAGATACGTGTACACCAACGTGTTTCGCCGTCTTCGT
GATA2|NM_001145661|2657	1263	2624	GATA2	NM_001145661	2657	TAGAAGACGCACCGGCTGGCGCATAACTATATGGAAGTTAATATTCATAGCTTCCATGTAGTTGTGCGCCAGTTTTTTGGCAAGCAAAAGACGGCATACGAGATTGGTGTACACCAACGTCATTCGCCGTCTTCGT
GATA4|NM_002052|2658	1264	2626	GATA4	NM_002052	2658	TAGAAGACGCACCGGCCCGGCTTATATGGCCGATGTGTTAATATTCATAGCACGTCGGCCATGTAAGCCGGGTTTTTTGGCAAGCAAAAGACGGCATACGAGATCAGTGTACACCAACGTACTTCGCCGTCTTCGT
GATA4|NM_002052|2659	1265	2626	GATA4	NM_002052	2659	TAGAAGACGCACCGGGGACATAATCACTGTGTAATCGTTAATATTCATAGCGATTACGCAGTGATTATGTCCTTTTTTGGCAAGCAAAAGACGGCATACGAGATGTGTGTACACCAACGTTGTTCGCCGTCTTCGT
GATA4|NM_002052|2660	1266	2626	GATA4	NM_002052	2660	TAGAAGACGCACCGGAAGGTAGAGAGTGTGTCAATTGTTAATATTCATAGCAGTTGACACACTCTCTGCCTTTTTTTTGGCAAGCAAAAGACGGCATACGAGATTGGTGTACACCAACCAGTTTCGCCGTCTTCGT
GATA4|NM_002052|2661	1267	2626	GATA4	NM_002052	2661	TAGAAGACGCACCGGGAAGCCCAAGAACTTGAATAAGTTAATATTCATAGCTTATTCAGGTTCTTGGGCTTCTTTTTTGGCAAGCAAAAGACGGCATACGAGATGTGTGTACACCAACCACATTCGCCGTCTTCGT
GATA4|NM_002052|2662	1268	2626	GATA4	NM_002052	2662	TAGAAGACGCACCGGACTTCTTAGAAGGTAGAGAGTGTTAATATTCATAGCACTCTCTGCCTTCTGAGAAGTTTTTTTGGCAAGCAAAAGACGGCATACGAGATACGTGTACACCAACCAACTTCGCCGTCTTCGT
GATA4|NM_002052|2663	1269	2626	GATA4	NM_002052	2663	TAGAAGACGCACCGGAAGCCCAAGAACTTGAATAAAGTTAATATTCATAGCTTTATTCAGGTTCTTGGGCTTTTTTTTGGCAAGCAAAAGACGGCATACGAGATCAGTGTACACCAACCATGTTCGCCGTCTTCGT
GATA4|NM_002052|2664	1270	2626	GATA4	NM_002052	2664	TAGAAGACGCACCGGGAATAAATCTAAGACATCAGCGTTAATATTCATAGCGCTGGTGTCTTAGATTTATTCTTTTTTGGCAAGCAAAAGACGGCATACGAGATGTGTGTACACCAACACGTTTCGCCGTCTTCGT
GATA4|NM_002052|2665	1271	2626	GATA4	NM_002052	2665	TAGAAGACGCACCGGTCTCGATATGTTTGATGACTTGTTAATATTCATAGCAAGTCGTCAAACATATCGAGATTTTTTGGCAAGCAAAAGACGGCATACGAGATCAGTGTACACCAACACCATTCGCCGTCTTCGT
TINF2|NM_001099274|2666	1272	26277	TINF2	NM_001099274	2666	TAGAAGACGCACCGGGAGACAATATGGTGTGGATATGTTAATATTCATAGCATGTCCACACCATATTGTCTCTTTTTTGGCAAGCAAAAGACGGCATACGAGATTGGTGTACACCAACACACTTCGCCGTCTTCGT
TINF2|NM_001099274|2667	1273	26277	TINF2	NM_001099274	2667	TAGAAGACGCACCGGACGCCTTTGTGTGGGCTTAAAGTTAATATTCATAGCTTTAGGCCCATACAAAGGCGTTTTTTTGGCAAGCAAAAGACGGCATACGAGATACGTGTACACCAACACTGTTCGCCGTCTTCGT
TINF2|NM_001099274|2668	1274	26277	TINF2	NM_001099274	2668	TAGAAGACGCACCGGGCAGGAACTTGAATAAGAGTAGTTAATATTCATAGCTACTCTTGTTCAAGTTCCTGCTTTTTTGGCAAGCAAAAGACGGCATACGAGATCAGTGTACACCAACTGGTTTCGCCGTCTTCGT
TINF2|NM_001099274|2669	1275	26277	TINF2	NM_001099274	2669	TAGAAGACGCACCGGCTCTTGCTTGGAGATAATATGGTTAATATTCATAGCCATATTGTCTCCAGGCAAGAGTTTTTTGGCAAGCAAAAGACGGCATACGAGATACGTGTACACCAACTGCATTCGCCGTCTTCGT
TINF2|NM_001099274|2670	1276	26277	TINF2	NM_001099274	2670	TAGAAGACGCACCGGCCAACCTAGGTCATATTTAAGGTTAATATTCATAGCCTTAGATATGACCTGGGTTGGTTTTTTGGCAAGCAAAAGACGGCATACGAGATGTGTGTACACCAACTGACTTCGCCGTCTTCGT
TINF2|NM_001099274|2671	1277	26277	TINF2	NM_001099274	2671	TAGAAGACGCACCGGGAATCCTCCTTAGCAATAAAGGTTAATATTCATAGCCTTTGTTGCTGAGGAGGATTCTTTTTTGGCAAGCAAAAGACGGCATACGAGATTGGTGTACACCAACTGTGTTCGCCGTCTTCGT
TINF2|NM_001099274|2672	1278	26277	TINF2	NM_001099274	2672	TAGAAGACGCACCGGGAAGCTGCAGGAATTTGAATAGTTAATATTCATAGCTGTTCAAGTTCCTGCAGCTTCTTTTTTGGCAAGCAAAAGACGGCATACGAGATCAGTGTACACCATGGTGTTTCGCCGTCTTCGT
TINF2|NM_001099274|2673	1279	26277	TINF2	NM_001099274	2673	TAGAAGACGCACCGGGACGAAGAGTTTAGTCCTAATGTTAATATTCATAGCATTGGGACTGAACTCTTCGTCTTTTTTGGCAAGCAAAAGACGGCATACGAGATACGTGTACACCATGGTCATTCGCCGTCTTCGT
MYEOV|NM_138768|2674	1280	26579	MYEOV	NM_138768	2674	TAGAAGACGCACCGGTGGGCTCTCTATGGAAATTATGTTAATATTCATAGCATAATTTCCATGGAGAGCCCATTTTTTGGCAAGCAAAAGACGGCATACGAGATGTGTGTACACCATGGTACTTCGCCGTCTTCGT
MYEOV|NM_138768|2675	1281	26579	MYEOV	NM_138768	2675	TAGAAGACGCACCGGGGAAATTGTGTGGGCGTGAATGTTAATATTCATAGCATTCGCGCCCACATAATTTCCTTTTTTGGCAAGCAAAAGACGGCATACGAGATTGGTGTACACCATGGTTGTTCGCCGTCTTCGT
MYEOV|NM_138768|2676	1282	26579	MYEOV	NM_138768	2676	TAGAAGACGCACCGGGAGAGAAATAAGGGAGATAAGGTTAATATTCATAGCCTTGTCTCCCTTGTTTCTCTCTTTTTTGGCAAGCAAAAGACGGCATACGAGATACGTGTACACCATGCAGTTTCGCCGTCTTCGT
MYEOV|NM_138768|2677	1283	26579	MYEOV	NM_138768	2677	TAGAAGACGCACCGGACAGGAGTTCTGGGAGTTAGTGTTAATATTCATAGCACTGACTCCCAGAATTCCTGTTTTTTTGGCAAGCAAAAGACGGCATACGAGATTGGTGTACACCATGCACATTCGCCGTCTTCGT
MYEOV|NM_138768|2678	1284	26579	MYEOV	NM_138768	2678	TAGAAGACGCACCGGTCAGAATCTGCGTCATATACAGTTAATATTCATAGCTGTATGTGACGCAGATTCTGATTTTTTGGCAAGCAAAAGACGGCATACGAGATCAGTGTACACCATGCAACTTCGCCGTCTTCGT
MYEOV|NM_138768|2679	1285	26579	MYEOV	NM_138768	2679	TAGAAGACGCACCGGCTGATTGTTGTGATTGTTGAGGTTAATATTCATAGCCTCAACAGTCACAACAGTCAGTTTTTTGGCAAGCAAAAGACGGCATACGAGATGTGTGTACACCATGCATGTTCGCCGTCTTCGT
MYEOV|NM_138768|2680	1286	26579	MYEOV	NM_138768	2680	TAGAAGACGCACCGGGGCTCTCTATGGAAATTATGTGTTAATATTCATAGCACATAATTTCCATGGAGAGCCTTTTTTGGCAAGCAAAAGACGGCATACGAGATTGGTGTACACCATGACGTTTCGCCGTCTTCGT
MYEOV|NM_138768|2681	1287	26579	MYEOV	NM_138768	2681	TAGAAGACGCACCGGGAAATTGTGTGGGCGTGAATGGTTAATATTCATAGCCATTCGCGCCCACATAATTTCTTTTTTGGCAAGCAAAAGACGGCATACGAGATGTGTGTACACCATGACCATTCGCCGTCTTCGT
GGCX|NM_000821|2682	1288	2677	GGCX	NM_000821	2682	TAGAAGACGCACCGGGCTAACATTCATGGATGTAAAGTTAATATTCATAGCTTTGCATCCATGAATGTTAGCTTTTTTGGCAAGCAAAAGACGGCATACGAGATACGTGTACACCATGACACTTCGCCGTCTTCGT
GGCX|NM_000821|2683	1289	2677	GGCX	NM_000821	2683	TAGAAGACGCACCGGCCTTTCTTAGACGCCAATAAAGTTAATATTCATAGCTTTGTTGGCGTCTAAGAAAGGTTTTTTGGCAAGCAAAAGACGGCATACGAGATCAGTGTACACCATGACTGTTCGCCGTCTTCGT
GGCX|NM_000821|2684	1290	2677	GGCX	NM_000821	2684	TAGAAGACGCACCGGCCGGATAAGTTGTGTGTTATTGTTAATATTCATAGCAATAACACACAGCTTATCCGGTTTTTTGGCAAGCAAAAGACGGCATACGAGATGTGTGTACACCATGTGGTTTCGCCGTCTTCGT
GGCX|NM_000821|2685	1291	2677	GGCX	NM_000821	2685	TAGAAGACGCACCGGGAGGGCTAAGTTATAGGAAATGTTAATATTCATAGCATTTCCTGTAACTTGGCCCTCTTTTTTGGCAAGCAAAAGACGGCATACGAGATCAGTGTACACCATGTGCATTCGCCGTCTTCGT
GGCX|NM_000821|2686	1292	2677	GGCX	NM_000821	2686	TAGAAGACGCACCGGGCAGACATGCTGAAGTAATATGTTAATATTCATAGCATATTGCTTCAGCATGTCTGCTTTTTTGGCAAGCAAAAGACGGCATACGAGATTGGTGTACACCATGTGACTTCGCCGTCTTCGT
GGCX|NM_000821|2687	1293	2677	GGCX	NM_000821	2687	TAGAAGACGCACCGGGATATTTGGGTCTCCATTAATGTTAATATTCATAGCATTGATGGAGACCCAAATATCTTTTTTGGCAAGCAAAAGACGGCATACGAGATACGTGTACACCATGTGTGTTCGCCGTCTTCGT
GGCX|NM_000821|2688	1294	2677	GGCX	NM_000821	2688	TAGAAGACGCACCGGGGTGGAGAATGGAGGTGAAATGTTAATATTCATAGCGTTTCACTTCCATTCTCCACCTTTTTTGGCAAGCAAAAGACGGCATACGAGATACGTGTACACACGTGTGTTTCGCCGTCTTCGT
GGT1|NM_001032364|2689	1295	2678	GGT1	NM_001032364	2689	TAGAAGACGCACCGGCTACAACAGTACCACATGAAAGTTAATATTCATAGCTTTCGTGTGGTGCTGTTGTAGTTTTTTGGCAAGCAAAAGACGGCATACGAGATTGGTGTACACACGTGTCATTCGCCGTCTTCGT
GGT1|NM_001032364|2690	1296	2678	GGT1	NM_001032364	2690	TAGAAGACGCACCGGCCCAGCATTACCAATGAGTTTGTTAATATTCATAGCAAACTCGTTGGTGATGCTGGGTTTTTTGGCAAGCAAAAGACGGCATACGAGATCAGTGTACACACGTGTACTTCGCCGTCTTCGT
GGT1|NM_001032364|2691	1297	2678	GGT1	NM_001032364	2691	TAGAAGACGCACCGGTGCTTGAAGATTGGGAGGGGTGTTAATATTCATAGCATCCCTCCCAATCTTCGAGCATTTTTTGGCAAGCAAAAGACGGCATACGAGATGTGTGTACACACGTGTTGTTCGCCGTCTTCGT
GGT1|NM_001032364|2692	1298	2678	GGT1	NM_001032364	2692	TAGAAGACGCACCGGCAATAATGAAATGGACGACTTGTTAATATTCATAGCAAGTCGTCCATTTCATTATTGTTTTTTGGCAAGCAAAAGACGGCATACGAGATTGGTGTACACACGTCAGTTTCGCCGTCTTCGT
GGT1|NM_001032364|2693	1299	2678	GGT1	NM_001032364	2693	TAGAAGACGCACCGGCCTCTTCCTCACTATCTATAAGTTAATATTCATAGCTTGTAGATGGTGAGGAAGAGGTTTTTTGGCAAGCAAAAGACGGCATACGAGATGTGTGTACACACGTCACATTCGCCGTCTTCGT
GGT1|NM_001032364|2694	1300	2678	GGT1	NM_001032364	2694	TAGAAGACGCACCGGTCATCCTCAACATCCTTAAAGGTTAATATTCATAGCCTTTGAGGATGTTGAGGATGATTTTTTGGCAAGCAAAAGACGGCATACGAGATACGTGTACACACGTCAACTTCGCCGTCTTCGT
GGT1|NM_001032364|2695	1301	2678	GGT1	NM_001032364	2695	TAGAAGACGCACCGGACATCCTCAAAGGGTATAACTGTTAATATTCATAGCAGTTGTACCCTTTGAGGATGTTTTTTTGGCAAGCAAAAGACGGCATACGAGATCAGTGTACACACGTCATGTTCGCCGTCTTCGT
GGT1|NM_001032364|2696	1302	2678	GGT1	NM_001032364	2696	TAGAAGACGCACCGGCCCAAGTTTGTGGGTGTGATTGTTAATATTCATAGCAGTCACATCCACAAACTTGGGTTTTTTGGCAAGCAAAAGACGGCATACGAGATGTGTGTACACACGTACGTTTCGCCGTCTTCGT
GGT7|NM_178026|2697	1303	2686	GGT7	NM_178026	2697	TAGAAGACGCACCGGGGCTTCAATGTGACTTATGATGTTAATATTCATAGCATCATGAGTCACGTTGAAGCCTTTTTTGGCAAGCAAAAGACGGCATACGAGATCAGTGTACACACGTACCATTCGCCGTCTTCGT
GGT7|NM_178026|2698	1304	2686	GGT7	NM_178026	2698	TAGAAGACGCACCGGCTGACATAGGTTCTGTTGAATGTTAATATTCATAGCATTCAGCAGAACCTGTGTCAGTTTTTTGGCAAGCAAAAGACGGCATACGAGATTGGTGTACACACGTACACTTCGCCGTCTTCGT
GGT7|NM_178026|2699	1305	2686	GGT7	NM_178026	2699	TAGAAGACGCACCGGAACATCTTGGAGGGCTTTAATGTTAATATTCATAGCATTGAAGCCCTCCAGGATGTTTTTTTTGGCAAGCAAAAGACGGCATACGAGATACGTGTACACACGTACTGTTCGCCGTCTTCGT
GGT7|NM_178026|2700	1306	2686	GGT7	NM_178026	2700	TAGAAGACGCACCGGACCGAAGAGGATTTCAGTAATGTTAATATTCATAGCATTGCTGAAGTCCTCTTCGGTTTTTTTGGCAAGCAAAAGACGGCATACGAGATCAGTGTACACACGTTGGTTTCGCCGTCTTCGT
GGT7|NM_178026|2701	1307	2686	GGT7	NM_178026	2701	TAGAAGACGCACCGGGAGTTCATAGAGGAAGAGATTGTTAATATTCATAGCAATCTCTTCCTCTGTGAACTCTTTTTTGGCAAGCAAAAGACGGCATACGAGATACGTGTACACACGTTGCATTCGCCGTCTTCGT
GGT7|NM_178026|2702	1308	2686	GGT7	NM_178026	2702	TAGAAGACGCACCGGGGAGATTCCGTTTATGATTCTGTTAATATTCATAGCAGAATCATAGACGGGATCTCCTTTTTTGGCAAGCAAAAGACGGCATACGAGATGTGTGTACACACGTTGACTTCGCCGTCTTCGT
GGT7|NM_178026|2703	1309	2686	GGT7	NM_178026	2703	TAGAAGACGCACCGGTGATCATGGGACTTGATGATTGTTAATATTCATAGCAGTCATCAGGTCCCATGATCATTTTTTGGCAAGCAAAAGACGGCATACGAGATTGGTGTACACACGTTGTGTTCGCCGTCTTCGT
GGT7|NM_178026|2704	1310	2686	GGT7	NM_178026	2704	TAGAAGACGCACCGGCATGAAGCTCATCAGCTTTATGTTAATATTCATAGCATAGAGCTGGTGAGCTTCATGTTTTTTGGCAAGCAAAAGACGGCATACGAGATCAGTGTACACACCAGTGTTTCGCCGTCTTCGT
ABL2|NM_001136000|2705	1311	27	ABL2	NM_001136000	2705	TAGAAGACGCACCGGGCGAACAGATATTACTATGAAGTTAATATTCATAGCTTCATGGTAATATCTGTTCGCTTTTTTGGCAAGCAAAAGACGGCATACGAGATACGTGTACACACCAGTCATTCGCCGTCTTCGT
ABL2|NM_001136000|2706	1312	27	ABL2	NM_001136000	2706	TAGAAGACGCACCGGCGGTTAGTATGGAGAGGTTTGGTTAATATTCATAGCTAAACCTCTCCATACTGACCGTTTTTTGGCAAGCAAAAGACGGCATACGAGATGTGTGTACACACCAGTACTTCGCCGTCTTCGT
ABL2|NM_001136000|2707	1313	27	ABL2	NM_001136000	2707	TAGAAGACGCACCGGCCCTCAAACTCGCAATAAATTGTTAATATTCATAGCAATTTGTTGCGAGTTTGAGGGTTTTTTGGCAAGCAAAAGACGGCATACGAGATTGGTGTACACACCAGTTGTTCGCCGTCTTCGT
ABL2|NM_001136000|2708	1314	27	ABL2	NM_001136000	2708	TAGAAGACGCACCGGCCTATGGAATGTCACTATATCGTTAATATTCATAGCGATATGGTGACATTCCATAGGTTTTTTGGCAAGCAAAAGACGGCATACGAGATACGTGTACACACCACAGTTTCGCCGTCTTCGT
ABL2|NM_001136000|2709	1315	27	ABL2	NM_001136000	2709	TAGAAGACGCACCGGCCACTGAGAGTGACTCTAATTGTTAATATTCATAGCGATTAGGGTCACTCTCAGTGGTTTTTTGGCAAGCAAAAGACGGCATACGAGATTGGTGTACACACCACACATTCGCCGTCTTCGT
ABL2|NM_001136000|2710	1316	27	ABL2	NM_001136000	2710	TAGAAGACGCACCGGGTTCCATGATTCCAGTATTTCGTTAATATTCATAGCGAAATGCTGGAGTCATGGAACTTTTTTGGCAAGCAAAAGACGGCATACGAGATCAGTGTACACACCACAACTTCGCCGTCTTCGT
ABL2|NM_001136000|2711	1317	27	ABL2	NM_001136000	2711	TAGAAGACGCACCGGGATGGGTTGGTGACAATATTAGTTAATATTCATAGCTAATGTTGTCACCAGCCCATCTTTTTTGGCAAGCAAAAGACGGCATACGAGATGTGTGTACACACCACATGTTCGCCGTCTTCGT
ABL2|NM_001136000|2712	1318	27	ABL2	NM_001136000	2712	TAGAAGACGCACCGGTCCCTCAAACTCGCAATAAATGTTAATATTCATAGCATTTGTTGCGAGTTTGAGGGATTTTTTGGCAAGCAAAAGACGGCATACGAGATTGGTGTACACACCAACGTTTCGCCGTCTTCGT
TPK1|NM_001042482|2713	1319	27010	TPK1	NM_001042482	2713	TAGAAGACGCACCGGCCTGCTTTCCATTGGGAGTTTGTTAATATTCATAGCAAATTCCCAGTGGAAAGCAGGTTTTTTGGCAAGCAAAAGACGGCATACGAGATGTGTGTACACACCAACCATTCGCCGTCTTCGT
TPK1|NM_001042482|2714	1320	27010	TPK1	NM_001042482	2714	TAGAAGACGCACCGGGACTTTACTAAGTGCCTTAAAGTTAATATTCATAGCTTTAAGGCACTTAGTAAAGTCTTTTTTGGCAAGCAAAAGACGGCATACGAGATACGTGTACACACCAACACTTCGCCGTCTTCGT
TPK1|NM_001042482|2715	1321	27010	TPK1	NM_001042482	2715	TAGAAGACGCACCGGCAGAGAATACTATGCTACTAAGTTAATATTCATAGCTTAGTAGCATAGTATTCTCTGTTTTTTGGCAAGCAAAAGACGGCATACGAGATCAGTGTACACACCAACTGTTCGCCGTCTTCGT
TPK1|NM_001042482|2716	1322	27010	TPK1	NM_001042482	2716	TAGAAGACGCACCGGCATTGGTCAGTACTTCTAATAGTTAATATTCATAGCTATTGGAAGTACTGACCAATGTTTTTTGGCAAGCAAAAGACGGCATACGAGATGTGTGTACACACCATGGTTTCGCCGTCTTCGT
TPK1|NM_001042482|2717	1323	27010	TPK1	NM_001042482	2717	TAGAAGACGCACCGGCAAGAGGAATTGCTGATTTACGTTAATATTCATAGCGTAGATCAGCGATTCCTCTTGTTTTTTGGCAAGCAAAAGACGGCATACGAGATCAGTGTACACACCATGCATTCGCCGTCTTCGT
TPK1|NM_001042482|2718	1324	27010	TPK1	NM_001042482	2718	TAGAAGACGCACCGGGTGATTGGTGTGGCTTTATTTGTTAATATTCATAGCGAATAAGGCCACACCAATCACTTTTTTGGCAAGCAAAAGACGGCATACGAGATTGGTGTACACACCATGACTTCGCCGTCTTCGT
TPK1|NM_001042482|2719	1325	27010	TPK1	NM_001042482	2719	TAGAAGACGCACCGGGTTGCATGTAGACATTGGAATGTTAATATTCATAGCATTCCAGTGTCTACATGCAACTTTTTTGGCAAGCAAAAGACGGCATACGAGATACGTGTACACACCATGTGTTCGCCGTCTTCGT
TPK1|NM_001042482|2720	1326	27010	TPK1	NM_001042482	2720	TAGAAGACGCACCGGGGATGTGAGCTCATTTCAATTGTTAATATTCATAGCAGTTGAAATGAGCTCACATCCTTTTTTGGCAAGCAAAAGACGGCATACGAGATGTGTGTACACACACGTGTTTCGCCGTCTTCGT
ZBTB32|NM_014383|2721	1327	27033	ZBTB32	NM_014383	2721	TAGAAGACGCACCGGAGGATCCCATTGTCCTTAAATGTTAATATTCATAGCATTTAGGGACAGTGGGATCCTTTTTTTGGCAAGCAAAAGACGGCATACGAGATCAGTGTACACACACGTCATTCGCCGTCTTCGT
ZBTB32|NM_014383|2722	1328	27033	ZBTB32	NM_014383	2722	TAGAAGACGCACCGGGATCCAGGCTTGAAGAAATATGTTAATATTCATAGCATGTTTCTTCAGGCCTGGATCTTTTTTGGCAAGCAAAAGACGGCATACGAGATTGGTGTACACACACGTACTTCGCCGTCTTCGT
ZBTB32|NM_014383|2723	1329	27033	ZBTB32	NM_014383	2723	TAGAAGACGCACCGGAGACCAGGTTAAAGGAGAAATGTTAATATTCATAGCGTTTCTCCTTTGACCTGGTCTTTTTTTGGCAAGCAAAAGACGGCATACGAGATACGTGTACACACACGTTGTTCGCCGTCTTCGT
ZBTB32|NM_014383|2724	1330	27033	ZBTB32	NM_014383	2724	TAGAAGACGCACCGGAGCACTCTGTGATACTTTGATGTTAATATTCATAGCATCAGAGTATCACAGAGTGCTTTTTTTGGCAAGCAAAAGACGGCATACGAGATCAGTGTACACACACCAGTTTCGCCGTCTTCGT
ZBTB32|NM_014383|2725	1331	27033	ZBTB32	NM_014383	2725	TAGAAGACGCACCGGGAGATGGAAGAGTTTGATTAGGTTAATATTCATAGCCTGATCAGACTCTTCCATCTCTTTTTTGGCAAGCAAAAGACGGCATACGAGATACGTGTACACACACCACATTCGCCGTCTTCGT
ZBTB32|NM_014383|2726	1332	27033	ZBTB32	NM_014383	2726	TAGAAGACGCACCGGGGAGAGAAGTAGAAACTAGAAGTTAATATTCATAGCTTCTGGTTTCTGCTTCTCTCCTTTTTTGGCAAGCAAAAGACGGCATACGAGATGTGTGTACACACACCAACTTCGCCGTCTTCGT
ZBTB32|NM_014383|2727	1333	27033	ZBTB32	NM_014383	2727	TAGAAGACGCACCGGCAAGGAATCTTGAGAGAGAATGTTAATATTCATAGCGTTCTCTCTCAGGATTCCTTGTTTTTTGGCAAGCAAAAGACGGCATACGAGATTGGTGTACACACACCATGTTCGCCGTCTTCGT
ZBTB32|NM_014383|2728	1334	27033	ZBTB32	NM_014383	2728	TAGAAGACGCACCGGAAGGAATCCTGAGAGAGAATTGTTAATATTCATAGCAGTTCTCTCTCAGGATTCCTTTTTTTTGGCAAGCAAAAGACGGCATACGAGATACGTGTACACACACACGTTTCGCCGTCTTCGT
FOXP1|NM_001012505|2729	1335	27086	FOXP1	NM_001012505	2729	TAGAAGACGCACCGGGCAGTAAGTTAGTGGATTAAAGTTAATATTCATAGCTTTAATCCACTAACTTGCTGCTTTTTTGGCAAGCAAAAGACGGCATACGAGATTGGTGTACACACACACCATTCGCCGTCTTCGT
FOXP1|NM_001012505|2730	1336	27086	FOXP1	NM_001012505	2730	TAGAAGACGCACCGGGCCCATTTCGTTAGTAGATATGTTAATATTCATAGCATATCTGCTGACGAAATGGGCTTTTTTGGCAAGCAAAAGACGGCATACGAGATCAGTGTACACACACACACTTCGCCGTCTTCGT
FOXP1|NM_001012505|2731	1337	27086	FOXP1	NM_001012505	2731	TAGAAGACGCACCGGGTGCGAAGATTTCCAATTATTGTTAATATTCATAGCAATGATTGGAAATCTTCGCACTTTTTTGGCAAGCAAAAGACGGCATACGAGATGTGTGTACACACACACTGTTCGCCGTCTTCGT
FOXP1|NM_001012505|2732	1338	27086	FOXP1	NM_001012505	2732	TAGAAGACGCACCGGTGCGAAGATTTCCAATCATTTGTTAATATTCATAGCAAATGATTGGAAATCTTCGCATTTTTTGGCAAGCAAAAGACGGCATACGAGATTGGTGTACACACACTGGTTTCGCCGTCTTCGT
FOXP1|NM_001012505|2733	1339	27086	FOXP1	NM_001012505	2733	TAGAAGACGCACCGGAGCCCAATGTAGAGTATAAATGTTAATATTCATAGCATTTGTACTCTACATTGGGCTTTTTTTGGCAAGCAAAAGACGGCATACGAGATGTGTGTACACACACTGCATTCGCCGTCTTCGT
FOXP1|NM_001012505|2734	1340	27086	FOXP1	NM_001012505	2734	TAGAAGACGCACCGGTGGTAACCCTTCCTTTATTAAGTTAATATTCATAGCTTAATAAGGGAAGGGTTACCATTTTTTGGCAAGCAAAAGACGGCATACGAGATACGTGTACACACACTGACTTCGCCGTCTTCGT
FOXP1|NM_001012505|2735	1341	27086	FOXP1	NM_001012505	2735	TAGAAGACGCACCGGGGAACAGTTGCAGTTTCAATTGTTAATATTCATAGCAGTTGAAGCTGCAACTGTTCCTTTTTTGGCAAGCAAAAGACGGCATACGAGATCAGTGTACACACACTGTGTTCGCCGTCTTCGT
FOXP1|NM_001012505|2736	1342	27086	FOXP1	NM_001012505	2736	TAGAAGACGCACCGGTGTGAAGTAGTGTGTGAAGATGTTAATATTCATAGCATCTTCGCACACTGCTTCACATTTTTTGGCAAGCAAAAGACGGCATACGAGATTGGTGTACACACTGGTGTTTCGCCGTCTTCGT
AFF4|NM_014423|2737	1343	27125	AFF4	NM_014423	2737	TAGAAGACGCACCGGGCAGACCATTATTTACAAGAAGTTAATATTCATAGCTTCTTGTAAATAATGGTCTGCTTTTTTGGCAAGCAAAAGACGGCATACGAGATGTGTGTACACACTGGTCATTCGCCGTCTTCGT
AFF4|NM_014423|2738	1344	27125	AFF4	NM_014423	2738	TAGAAGACGCACCGGGCACCAGTCTAAATTTATGTTGTTAATATTCATAGCAACATAGATTTAGACTGGTGCTTTTTTGGCAAGCAAAAGACGGCATACGAGATACGTGTACACACTGGTACTTCGCCGTCTTCGT
AFF4|NM_014423|2739	1345	27125	AFF4	NM_014423	2739	TAGAAGACGCACCGGCCATACAAAGTTACTAGCAAAGTTAATATTCATAGCTTTGCTAGTAACTTTGTATGGTTTTTTGGCAAGCAAAAGACGGCATACGAGATCAGTGTACACACTGGTTGTTCGCCGTCTTCGT
AFF4|NM_014423|2740	1346	27125	AFF4	NM_014423	2740	TAGAAGACGCACCGGCCAGCTATGTTTAGGTCATATGTTAATATTCATAGCATGTGACCTGAACATAGCTGGTTTTTTGGCAAGCAAAAGACGGCATACGAGATGTGTGTACACACTGCAGTTTCGCCGTCTTCGT
AFF4|NM_014423|2741	1347	27125	AFF4	NM_014423	2741	TAGAAGACGCACCGGATGGATCAGAACACTCTAAATGTTAATATTCATAGCATTTGGAGTGTTCTGATCCATTTTTTTGGCAAGCAAAAGACGGCATACGAGATCAGTGTACACACTGCACATTCGCCGTCTTCGT
AFF4|NM_014423|2742	1348	27125	AFF4	NM_014423	2742	TAGAAGACGCACCGGGGAAAGGTGGAATTAGGAAATGTTAATATTCATAGCATTTCCTGATTCCGCCTTTCCTTTTTTGGCAAGCAAAAGACGGCATACGAGATTGGTGTACACACTGCAACTTCGCCGTCTTCGT
AFF4|NM_014423|2743	1349	27125	AFF4	NM_014423	2743	TAGAAGACGCACCGGGCAGATAATTCTAGGGATGATGTTAATATTCATAGCATCATCCCTGGAGTTATCTGCTTTTTTGGCAAGCAAAAGACGGCATACGAGATACGTGTACACACTGCATGTTCGCCGTCTTCGT
AFF4|NM_014423|2744	1350	27125	AFF4	NM_014423	2744	TAGAAGACGCACCGGCTGATAGAGCACTTGAAGAATGTTAATATTCATAGCATTCTTCAGGTGCTCTGTCAGTTTTTTGGCAAGCAAAAGACGGCATACGAGATCAGTGTACACACTGACGTTTCGCCGTCTTCGT
STK36|NM_001243313|2745	1351	27148	STK36	NM_001243313	2745	TAGAAGACGCACCGGCGGGATCTTAGTCTTAGAATTGTTAATATTCATAGCAATTCTGAGGCTAAGATCCCGTTTTTTGGCAAGCAAAAGACGGCATACGAGATACGTGTACACACTGACCATTCGCCGTCTTCGT
STK36|NM_001243313|2746	1352	27148	STK36	NM_001243313	2746	TAGAAGACGCACCGGCCAGTATGGAAGTATCCTTATGTTAATATTCATAGCATGAGGATACTTCCATGCTGGTTTTTTGGCAAGCAAAAGACGGCATACGAGATGTGTGTACACACTGACACTTCGCCGTCTTCGT
STK36|NM_001243313|2747	1353	27148	STK36	NM_001243313	2747	TAGAAGACGCACCGGCCCAGAACTTTAGGTCTTAAAGTTAATATTCATAGCTTTAGGACCTGAAGTTCTGGGTTTTTTGGCAAGCAAAAGACGGCATACGAGATTGGTGTACACACTGACTGTTCGCCGTCTTCGT
STK36|NM_001243313|2748	1354	27148	STK36	NM_001243313	2748	TAGAAGACGCACCGGATCTTGACTCAGGCTTATAAAGTTAATATTCATAGCTTTATAGGCCTGAGTCAAGATTTTTTTGGCAAGCAAAAGACGGCATACGAGATACGTGTACACACTGTGGTTTCGCCGTCTTCGT
STK36|NM_001243313|2749	1355	27148	STK36	NM_001243313	2749	TAGAAGACGCACCGGGCTGGTCATGTCACTATAATAGTTAATATTCATAGCTATTATGGTGACATGACCAGCTTTTTTGGCAAGCAAAAGACGGCATACGAGATTGGTGTACACACTGTGCATTCGCCGTCTTCGT
STK36|NM_001243313|2750	1356	27148	STK36	NM_001243313	2750	TAGAAGACGCACCGGGGATATGTCCAGTTTAGAAATGTTAATATTCATAGCATTTCTGAACTGGACATATCCTTTTTTGGCAAGCAAAAGACGGCATACGAGATCAGTGTACACACTGTGACTTCGCCGTCTTCGT
STK36|NM_001243313|2751	1357	27148	STK36	NM_001243313	2751	TAGAAGACGCACCGGGAGGCCATGTAGAAGAAATATGTTAATATTCATAGCATGTTTCTTCTGCATGGCCTCTTTTTTGGCAAGCAAAAGACGGCATACGAGATGTGTGTACACACTGTGTGTTCGCCGTCTTCGT
STK36|NM_001243313|2752	1358	27148	STK36	NM_001243313	2752	TAGAAGACGCACCGGGGTGTATAAGGGTTGAAGAAAGTTAATATTCATAGCTTTCTTCGACCCTTGTACACCTTTTTTGGCAAGCAAAAGACGGCATACGAGATTGGTGTACACTGGTGTGTTTCGCCGTCTTCGT
DISC1|NM_001012957|2753	1359	27185	DISC1	NM_001012957	2753	TAGAAGACGCACCGGCCGAGGAGATTAGATTATTAAGTTAATATTCATAGCTTAATGATCTAATCTCCTCGGTTTTTTGGCAAGCAAAAGACGGCATACGAGATGTGTGTACACTGGTGTCATTCGCCGTCTTCGT
DISC1|NM_001012957|2754	1360	27185	DISC1	NM_001012957	2754	TAGAAGACGCACCGGGAGACGTTACAACAAAGATTAGTTAATATTCATAGCTAATCTTTGTTGTAACGTCTCTTTTTTGGCAAGCAAAAGACGGCATACGAGATACGTGTACACTGGTGTACTTCGCCGTCTTCGT
DISC1|NM_001012957|2755	1361	27185	DISC1	NM_001012957	2755	TAGAAGACGCACCGGGCAGTTGAGAATGATGATTATGTTAATATTCATAGCATAATCATCATTCTCAACTGCTTTTTTGGCAAGCAAAAGACGGCATACGAGATCAGTGTACACTGGTGTTGTTCGCCGTCTTCGT
DISC1|NM_001012957|2756	1362	27185	DISC1	NM_001012957	2756	TAGAAGACGCACCGGCGATTGCTTATCTAGTGCTTAGTTAATATTCATAGCTAGGCACTGGATAAGCAATCGTTTTTTGGCAAGCAAAAGACGGCATACGAGATGTGTGTACACTGGTCAGTTTCGCCGTCTTCGT
NAT2|NM_000015|1	1363	10	NAT2	NM_000015	1	TAGAAGACGCACCGGCCACAATGTTGGGAGGGTGTTGTTAATATTCATAGCAATACCCTCCTAACATTGTGGTTTTTTGGCAAGCAAAAGACGGCATACGAGATCAGTGTGTGTGTGTGTCATTCGCCGTCTTCGT
NAT2|NM_000015|2	1364	10	NAT2	NM_000015	2	TAGAAGACGCACCGGAGTTGGGCTTAGAGGTTATTTGTTAATATTCATAGCAAATAGCCTCTAAGCCCAACTTTTTTTGGCAAGCAAAAGACGGCATACGAGATTGGTGTGTGTGTGTGTACTTCGCCGTCTTCGT
NAT2|NM_000015|3	1365	10	NAT2	NM_000015	3	TAGAAGACGCACCGGGTTGAAGAAGTGTTGAGAAATGTTAATATTCATAGCATTTCTCAGCACTTCTTCAACTTTTTTGGCAAGCAAAAGACGGCATACGAGATACGTGTGTGTGTGTGTTGTTCGCCGTCTTCGT
NAT2|NM_000015|4	1366	10	NAT2	NM_000015	4	TAGAAGACGCACCGGACATCCCTCCAGTTAATAAATGTTAATATTCATAGCATTTGTTAACTGGAGGGATGTTTTTTTGGCAAGCAAAAGACGGCATACGAGATCAGTGTGTGTGTGTCAGTTTCGCCGTCTTCGT
NAT2|NM_000015|5	1367	10	NAT2	NM_000015	5	TAGAAGACGCACCGGGTGTCTCCAGGTTAATCAATTGTTAATATTCATAGCAGTTGATTGACCTGGAGACACTTTTTTGGCAAGCAAAAGACGGCATACGAGATACGTGTGTGTGTGTCACATTCGCCGTCTTCGT
NAT2|NM_000015|6	1368	10	NAT2	NM_000015	6	TAGAAGACGCACCGGAATCTGGTACCTGGACTAAATGTTAATATTCATAGCATTTGGTCCAGGTACCAGATTTTTTTTGGCAAGCAAAAGACGGCATACGAGATGTGTGTGTGTGTGTCAACTTCGCCGTCTTCGT
NAT2|NM_000015|7	1369	10	NAT2	NM_000015	7	TAGAAGACGCACCGGGTGGCAGCCTTTAGAATTAATGTTAATATTCATAGCATTAATTCTAGAGGCTGCCACTTTTTTGGCAAGCAAAAGACGGCATACGAGATTGGTGTGTGTGTGTCATGTTCGCCGTCTTCGT
NAT2|NM_000015|8	1370	10	NAT2	NM_000015	8	TAGAAGACGCACCGGGGTGATGGATCCCTTATTATTGTTAATATTCATAGCAATAGTAAGGGATCCATCACCTTTTTTGGCAAGCAAAAGACGGCATACGAGATACGTGTGTGTGTGTACGTTTCGCCGTCTTCGT
ADA|NM_000022|9	1371	100	ADA	NM_000022	9	TAGAAGACGCACCGGCTGAACATTAATGCGGCTAAAGTTAATATTCATAGCTTTGGCCGCATTGATGTTCAGTTTTTTGGCAAGCAAAAGACGGCATACGAGATTGGTGTGTGTGTGTACCATTCGCCGTCTTCGT
ADA|NM_000022|10	1372	100	ADA	NM_000022	10	TAGAAGACGCACCGGCATGCAGTTATTCGGCTTAAAGTTAATATTCATAGCTTTGAGCCGAATGACTGCATGTTTTTTGGCAAGCAAAAGACGGCATACGAGATCAGTGTGTGTGTGTACACTTCGCCGTCTTCGT
ADA|NM_000022|11	1373	100	ADA	NM_000022	11	TAGAAGACGCACCGGGTTTCCTCCTAGAAGATGAAAGTTAATATTCATAGCTTTCATCTTCTGGGAGGAAACTTTTTTGGCAAGCAAAAGACGGCATACGAGATGTGTGTGTGTGTGTACTGTTCGCCGTCTTCGT
ADA|NM_000022|12	1374	100	ADA	NM_000022	12	TAGAAGACGCACCGGGAACGTCATTGGTATGGATAAGTTAATATTCATAGCTTGTCCATGCCAATGACGTTCTTTTTTGGCAAGCAAAAGACGGCATACGAGATTGGTGTGTGTGTGTTGGTTTCGCCGTCTTCGT
ADA|NM_000022|13	1375	100	ADA	NM_000022	13	TAGAAGACGCACCGGGTGGACATATTCAAGATAGAGGTTAATATTCATAGCCTCTGTCTTGAGTATGTCCACTTTTTTGGCAAGCAAAAGACGGCATACGAGATGTGTGTGTGTGTGTTGCATTCGCCGTCTTCGT
ADA|NM_000022|14	1376	100	ADA	NM_000022	14	TAGAAGACGCACCGGTTCTCGACCTGCTTTATAAAGGTTAATATTCATAGCCTTTATAGAGCAGGTCGAGAATTTTTTGGCAAGCAAAAGACGGCATACGAGATACGTGTGTGTGTGTTGACTTCGCCGTCTTCGT
ADA|NM_000022|15	1377	100	ADA	NM_000022	15	TAGAAGACGCACCGGAACTACTCGCTCAACATAGATGTTAATATTCATAGCATCTGTGTTGAGCGAGTAGTTTTTTTTGGCAAGCAAAAGACGGCATACGAGATCAGTGTGTGTGTGTTGTGTTCGCCGTCTTCGT
ABI1|NM_001012750|16	1378	10006	ABI1	NM_001012750	16	TAGAAGACGCACCGGCAGTAGTATTGGCATTTCCATGTTAATATTCATAGCATGGGAATGCCAATACTACTGTTTTTTGGCAAGCAAAAGACGGCATACGAGATTGGTGTGTGTGTCAGTGTTTCGCCGTCTTCGT
ABI1|NM_001012750|17	1379	10006	ABI1	NM_001012750	17	TAGAAGACGCACCGGCCATGGTGTTAAGTGGTTAAAGTTAATATTCATAGCTTTAGCCACTTGACACCATGGTTTTTTGGCAAGCAAAAGACGGCATACGAGATGTGTGTGTGTGTCAGTCATTCGCCGTCTTCGT
ABI1|NM_001012750|18	1380	10006	ABI1	NM_001012750	18	TAGAAGACGCACCGGCCACTACTAGTGGATTATGAAGTTAATATTCATAGCTTCATAATCCACTGGTGGTGGTTTTTTGGCAAGCAAAAGACGGCATACGAGATACGTGTGTGTGTCAGTACTTCGCCGTCTTCGT
ABI1|NM_001012750|19	1381	10006	ABI1	NM_001012750	19	TAGAAGACGCACCGGGGCACACTGTTGAGAATAAATGTTAATATTCATAGCATTTGTTCTCGACAGTGTGCCTTTTTTGGCAAGCAAAAGACGGCATACGAGATCAGTGTGTGTGTCAGTTGTTCGCCGTCTTCGT
ABI1|NM_001012750|20	1382	10006	ABI1	NM_001012750	20	TAGAAGACGCACCGGGCTGCAGTAGTTTAGTATAATGTTAATATTCATAGCATTATACTGAACTACTGCAGCTTTTTTGGCAAGCAAAAGACGGCATACGAGATGTGTGTGTGTGTCACAGTTTCGCCGTCTTCGT
ABI1|NM_001012750|21	1383	10006	ABI1	NM_001012750	21	TAGAAGACGCACCGGGTCATTTATGGAGGGTGTAATGTTAATATTCATAGCATTGCACCCTCCATAAATGACTTTTTTGGCAAGCAAAAGACGGCATACGAGATCAGTGTGTGTGTCACACATTCGCCGTCTTCGT
ABI1|NM_001012750|22	1384	10006	ABI1	NM_001012750	22	TAGAAGACGCACCGGGATGTTATTAGAGGAGGAGATGTTAATATTCATAGCATCTCCTCCTCTAGTAACATCTTTTTTGGCAAGCAAAAGACGGCATACGAGATTGGTGTGTGTGTCACAACTTCGCCGTCTTCGT
ABI1|NM_001012750|23	1385	10006	ABI1	NM_001012750	23	TAGAAGACGCACCGGTCTGCTCAGCCTTATGTTAATGTTAATATTCATAGCATTAACATGAGGCTGAGCAGATTTTTTGGCAAGCAAAAGACGGCATACGAGATACGTGTGTGTGTCACATGTTCGCCGTCTTCGT
HDAC6|NM_006044|24	1386	10013	HDAC6	NM_006044	24	TAGAAGACGCACCGGGCCTATGAGTTTAACCTAGAAGTTAATATTCATAGCTTCTGGGTTAAACTCGTAGGCTTTTTTGGCAAGCAAAAGACGGCATACGAGATCAGTGTGTGTGTCAACGTTTCGCCGTCTTCGT
HDAC6|NM_006044|25	1387	10013	HDAC6	NM_006044	25	TAGAAGACGCACCGGGCACAGTCTTGTGGATGGTTAGTTAATATTCATAGCTAGCCATCCATAAGACTGTGCTTTTTTGGCAAGCAAAAGACGGCATACGAGATACGTGTGTGTGTCAACCATTCGCCGTCTTCGT
HDAC6|NM_006044|26	1388	10013	HDAC6	NM_006044	26	TAGAAGACGCACCGGCGGTAATGGAATTCAGCATATGTTAATATTCATAGCATGTGCTGAGTTCCATTACCGTTTTTTGGCAAGCAAAAGACGGCATACGAGATGTGTGTGTGTGTCAACACTTCGCCGTCTTCGT
HDAC6|NM_006044|27	1389	10013	HDAC6	NM_006044	27	TAGAAGACGCACCGGCCTCATTGATCAGGCTATATTGTTAATATTCATAGCAATATGGCCTGATCAGTGAGGTTTTTTGGCAAGCAAAAGACGGCATACGAGATTGGTGTGTGTGTCAACTGTTCGCCGTCTTCGT
HDAC6|NM_006044|28	1390	10013	HDAC6	NM_006044	28	TAGAAGACGCACCGGCTCACTGATCAGGCTATATTTGTTAATATTCATAGCAAATATGGCCTGATCAGTGAGTTTTTTGGCAAGCAAAAGACGGCATACGAGATACGTGTGTGTGTCATGGTTTCGCCGTCTTCGT
HDAC6|NM_006044|29	1391	10013	HDAC6	NM_006044	29	TAGAAGACGCACCGGTATCCTAGAGGGTGGTTATAAGTTAATATTCATAGCTTATAGCCACCCTCTAGGATATTTTTTGGCAAGCAAAAGACGGCATACGAGATTGGTGTGTGTGTCATGCATTCGCCGTCTTCGT
HDAC6|NM_006044|30	1392	10013	HDAC6	NM_006044	30	TAGAAGACGCACCGGGTCACTTCGAAGTGAAATATTGTTAATATTCATAGCAATATTTCGCTTCGAAGTGACTTTTTTGGCAAGCAAAAGACGGCATACGAGATCAGTGTGTGTGTCATGACTTCGCCGTCTTCGT
HDAC6|NM_006044|31	1393	10013	HDAC6	NM_006044	31	TAGAAGACGCACCGGGTGTTGGATGAGTAGTTAAATGTTAATATTCATAGCATTTAACTGCTCATCCAACACTTTTTTGGCAAGCAAAAGACGGCATACGAGATGTGTGTGTGTGTCATGTGTTCGCCGTCTTCGT
BCL2L11|NM_001204106|32	1394	10018	BCL2L11	NM_001204106	32	TAGAAGACGCACCGGATGGTTATCTTACGACTGTTAGTTAATATTCATAGCTAACAGTCGTAAGATAACCATTTTTTTGGCAAGCAAAAGACGGCATACGAGATACGTGTGTGTGTACGTGTTTCGCCGTCTTCGT
BCL2L11|NM_001204106|33	1395	10018	BCL2L11	NM_001204106	33	TAGAAGACGCACCGGTACTATGTAAGGAGGGTATTTGTTAATATTCATAGCAAATACCCTCCTTGCATAGTATTTTTTGGCAAGCAAAAGACGGCATACGAGATTGGTGTGTGTGTACGTCATTCGCCGTCTTCGT
BCL2L11|NM_001204106|34	1396	10018	BCL2L11	NM_001204106	34	TAGAAGACGCACCGGGGCGTATTGGAGATGAGTTTGGTTAATATTCATAGCTAAACTCGTCTCCAATACGCCTTTTTTGGCAAGCAAAAGACGGCATACGAGATCAGTGTGTGTGTACGTACTTCGCCGTCTTCGT
BCL2L11|NM_001204106|35	1397	10018	BCL2L11	NM_001204106	35	TAGAAGACGCACCGGGACCACCCATGAATGGTTATTGTTAATATTCATAGCGATAACCATTCGTGGGTGGTCTTTTTTGGCAAGCAAAAGACGGCATACGAGATGTGTGTGTGTGTACGTTGTTCGCCGTCTTCGT
BCL2L11|NM_001204106|36	1398	10018	BCL2L11	NM_001204106	36	TAGAAGACGCACCGGGTGACTGAGAAGGTAGATAATGTTAATATTCATAGCATTGTCTACCTTCTCGGTCACTTTTTTGGCAAGCAAAAGACGGCATACGAGATTGGTGTGTGTGTACCAGTTTCGCCGTCTTCGT
BCL2L11|NM_001204106|37	1399	10018	BCL2L11	NM_001204106	37	TAGAAGACGCACCGGCAAGGTAATCCTGAAGGTAATGTTAATATTCATAGCATTGCCTTCAGGATTACCTTGTTTTTTGGCAAGCAAAAGACGGCATACGAGATGTGTGTGTGTGTACCACATTCGCCGTCTTCGT
BCL2L11|NM_001204106|38	1400	10018	BCL2L11	NM_001204106	38	TAGAAGACGCACCGGCTTACGACTGTTACGTTATATGTTAATATTCATAGCATGTAACGTAACAGTCGTAAGTTTTTTGGCAAGCAAAAGACGGCATACGAGATACGTGTGTGTGTACCAACTTCGCCGTCTTCGT
PIGK|NM_005482|39	1401	10026	PIGK	NM_005482	39	TAGAAGACGCACCGGGCTCAGATAATACACTAGAAAGTTAATATTCATAGCTTTCTGGTGTATTATCTGAGCTTTTTTGGCAAGCAAAAGACGGCATACGAGATCAGTGTGTGTGTACCATGTTCGCCGTCTTCGT
PIGK|NM_005482|40	1402	10026	PIGK	NM_005482	40	TAGAAGACGCACCGGCGCTACAATGAGCTATTGTTTGTTAATATTCATAGCAAACAGTAGCTCATTGTAGCGTTTTTTGGCAAGCAAAAGACGGCATACGAGATGTGTGTGTGTGTACACGTTTCGCCGTCTTCGT
PIGK|NM_005482|41	1403	10026	PIGK	NM_005482	41	TAGAAGACGCACCGGGCAGATGATATGGCTTGTAATGTTAATATTCATAGCATTACAGGCCATATCATCTGCTTTTTTGGCAAGCAAAAGACGGCATACGAGATCAGTGTGTGTGTACACCATTCGCCGTCTTCGT
PIGK|NM_005482|42	1404	10026	PIGK	NM_005482	42	TAGAAGACGCACCGGGCTAGTCATATCGAGGATTAAGTTAATATTCATAGCTTGATCCTCGATATGACTAGCTTTTTTGGCAAGCAAAAGACGGCATACGAGATTGGTGTGTGTGTACACACTTCGCCGTCTTCGT
PIGK|NM_005482|43	1405	10026	PIGK	NM_005482	43	TAGAAGACGCACCGGACTTCCTGTAGCTTAGATAATGTTAATATTCATAGCATTATCTGAGCTACAGGAAGTTTTTTTGGCAAGCAAAAGACGGCATACGAGATACGTGTGTGTGTACACTGTTCGCCGTCTTCGT
PIGK|NM_005482|44	1406	10026	PIGK	NM_005482	44	TAGAAGACGCACCGGAAGTGTATGGAAAGTGGAAATGTTAATATTCATAGCATTTCCACTTTCCGTACACTTTTTTTTGGCAAGCAAAAGACGGCATACGAGATCAGTGTGTGTGTACTGGTTTCGCCGTCTTCGT
PIGK|NM_005482|45	1407	10026	PIGK	NM_005482	45	TAGAAGACGCACCGGACATCCTGATTCTGGTTTAATGTTAATATTCATAGCATTAAACCAGAATCGGGATGTTTTTTTGGCAAGCAAAAGACGGCATACGAGATACGTGTGTGTGTACTGCATTCGCCGTCTTCGT
CDH5|NM_001795|46	1408	1003	CDH5	NM_001795	46	TAGAAGACGCACCGGCGCCTCTGTTATGTACTAAATGTTAATATTCATAGCATTTGGTACATGACAGAGGCGTTTTTTGGCAAGCAAAAGACGGCATACGAGATGTGTGTGTGTGTACTGACTTCGCCGTCTTCGT
CDH5|NM_001795|47	1409	1003	CDH5	NM_001795	47	TAGAAGACGCACCGGCGTGGATTACGACTTCTTTAAGTTAATATTCATAGCTTAAGGAAGTCGTAATCCACGTTTTTTGGCAAGCAAAAGACGGCATACGAGATTGGTGTGTGTGTACTGTGTTCGCCGTCTTCGT
CDH5|NM_001795|48	1410	1003	CDH5	NM_001795	48	TAGAAGACGCACCGGCCGCAATAGACAAGGATATAAGTTAATATTCATAGCTTATGTCCTTGTCTATTGCGGTTTTTTGGCAAGCAAAAGACGGCATACGAGATCAGTGTGTGTGTTGGTGTTTCGCCGTCTTCGT
CDH5|NM_001795|49	1411	1003	CDH5	NM_001795	49	TAGAAGACGCACCGGCACGAAACGTGAAGTTTAAATGTTAATATTCATAGCATTTGAACTTCACGTTTCGTGTTTTTTGGCAAGCAAAAGACGGCATACGAGATACGTGTGTGTGTTGGTCATTCGCCGTCTTCGT
CDH5|NM_001795|50	1412	1003	CDH5	NM_001795	50	TAGAAGACGCACCGGGTTCACTTTCTGTGAGGATATGTTAATATTCATAGCATATCCTCGCAGAAGGTGAACTTTTTTGGCAAGCAAAAGACGGCATACGAGATGTGTGTGTGTGTTGGTACTTCGCCGTCTTCGT
CDH5|NM_001795|51	1413	1003	CDH5	NM_001795	51	TAGAAGACGCACCGGAGTACCTGCTTAAAGGAGAATGTTAATATTCATAGCATTCTCCTTTGAGCAGGTACTTTTTTTGGCAAGCAAAAGACGGCATACGAGATTGGTGTGTGTGTTGGTTGTTCGCCGTCTTCGT
CDH5|NM_001795|52	1414	1003	CDH5	NM_001795	52	TAGAAGACGCACCGGTCAAGTGTGAGTCGTAAGAATGTTAATATTCATAGCATTCTTGCGACTCACGCTTGATTTTTTGGCAAGCAAAAGACGGCATACGAGATACGTGTGTGTGTTGCAGTTTCGCCGTCTTCGT
CDH5|NM_001795|53	1415	1003	CDH5	NM_001795	53	TAGAAGACGCACCGGGAAAGAACTGGATAGAGAAGTGTTAATATTCATAGCACTTCTCTGTCCAGTTCTTTCTTTTTTGGCAAGCAAAAGACGGCATACGAGATTGGTGTGTGTGTTGCACATTCGCCGTCTTCGT
RANBP9|NM_005493|54	1416	10048	RANBP9	NM_005493	54	TAGAAGACGCACCGGGCTCTAAACATGACCATGAAAGTTAATATTCATAGCTTTCGTGGTCATGTTTAGAGCTTTTTTGGCAAGCAAAAGACGGCATACGAGATCAGTGTGTGTGTTGCAACTTCGCCGTCTTCGT
RANBP9|NM_005493|55	1417	10048	RANBP9	NM_005493	55	TAGAAGACGCACCGGGCTTCCATTAAGAATAGACAAGTTAATATTCATAGCTTGTCTATTCTTAATGGAAGCTTTTTTGGCAAGCAAAAGACGGCATACGAGATGTGTGTGTGTGTTGCATGTTCGCCGTCTTCGT
RANBP9|NM_005493|56	1418	10048	RANBP9	NM_005493	56	TAGAAGACGCACCGGGCATTCAGTCTACTAGTATATGTTAATATTCATAGCATATGCTAGTAGACTGAATGCTTTTTTGGCAAGCAAAAGACGGCATACGAGATTGGTGTGTGTGTTGACGTTTCGCCGTCTTCGT
RANBP9|NM_005493|57	1419	10048	RANBP9	NM_005493	57	TAGAAGACGCACCGGCAATCATATTGCCATAGTAATGTTAATATTCATAGCATTACTATGGCAATATGATTGTTTTTTGGCAAGCAAAAGACGGCATACGAGATGTGTGTGTGTGTTGACCATTCGCCGTCTTCGT
RANBP9|NM_005493|58	1420	10048	RANBP9	NM_005493	58	TAGAAGACGCACCGGTCAAGATCACAGCAAGTTAATGTTAATATTCATAGCATTAACTTGCTGTGATCTTGATTTTTTGGCAAGCAAAAGACGGCATACGAGATACGTGTGTGTGTTGACACTTCGCCGTCTTCGT
RANBP9|NM_005493|59	1421	10048	RANBP9	NM_005493	59	TAGAAGACGCACCGGAGTTGTAGTAATGGTGTAATAGTTAATATTCATAGCTATTACACCATTACTACAACTTTTTTTGGCAAGCAAAAGACGGCATACGAGATCAGTGTGTGTGTTGACTGTTCGCCGTCTTCGT
RANBP9|NM_005493|60	1422	10048	RANBP9	NM_005493	60	TAGAAGACGCACCGGGCAGCTTGTGGGATTTATTATGTTAATATTCATAGCATAATAAATCCCACAGGCTGCTTTTTTGGCAAGCAAAAGACGGCATACGAGATGTGTGTGTGTGTTGTGGTTTCGCCGTCTTCGT
RANBP9|NM_005493|61	1423	10048	RANBP9	NM_005493	61	TAGAAGACGCACCGGGGTTGGGATAAGCATTTATATGTTAATATTCATAGCATATGAATGCTTATCCCAACCTTTTTTGGCAAGCAAAAGACGGCATACGAGATCAGTGTGTGTGTTGTGCATTCGCCGTCTTCGT
ABCC5|NM_001023587|62	1424	10057	ABCC5	NM_001023587	62	TAGAAGACGCACCGGCCCTTGGTATTCTTGGTTATTGTTAATATTCATAGCAATAACCAGGAATGCCAAGGGTTTTTTGGCAAGCAAAAGACGGCATACGAGATTGGTGTGTGTGTTGTGACTTCGCCGTCTTCGT
ABCC5|NM_001023587|63	1425	10057	ABCC5	NM_001023587	63	TAGAAGACGCACCGGGCTTTGAAAGTAACACTGTTTGTTAATATTCATAGCAAACGGTGTTACTTTCAAAGCTTTTTTGGCAAGCAAAAGACGGCATACGAGATACGTGTGTGTGTTGTGTGTTCGCCGTCTTCGT
ABCC5|NM_001023587|64	1426	10057	ABCC5	NM_001023587	64	TAGAAGACGCACCGGCCGCCATTGTAAGATTCTGGTGTTAATATTCATAGCATCAGAATCTTACAGTGGCGGTTTTTTGGCAAGCAAAAGACGGCATACGAGATTGGTGTGTGTCAGTGTGTTTCGCCGTCTTCGT
ABCC5|NM_001023587|65	1427	10057	ABCC5	NM_001023587	65	TAGAAGACGCACCGGCCACATCTTCAATAGTGTTATGTTAATATTCATAGCATAGCACTATTGAAGATGTGGTTTTTTGGCAAGCAAAAGACGGCATACGAGATGTGTGTGTGTCAGTGTCATTCGCCGTCTTCGT
ABCC5|NM_001023587|66	1428	10057	ABCC5	NM_001023587	66	TAGAAGACGCACCGGCTAGGTTCTGATAGGATTATGGTTAATATTCATAGCCATAATCCTATCGGAGCCTAGTTTTTTGGCAAGCAAAAGACGGCATACGAGATACGTGTGTGTCAGTGTACTTCGCCGTCTTCGT
ABCC5|NM_001023587|67	1429	10057	ABCC5	NM_001023587	67	TAGAAGACGCACCGGATCACGGCTCACAGTATATTTGTTAATATTCATAGCAAATATGCTGTGAGCCGTGATTTTTTTGGCAAGCAAAAGACGGCATACGAGATCAGTGTGTGTCAGTGTTGTTCGCCGTCTTCGT
ABCC5|NM_001023587|68	1430	10057	ABCC5	NM_001023587	68	TAGAAGACGCACCGGCACCGCTAGTTGAGATTAATTGTTAATATTCATAGCAATTGATCTCAACTGGCGGTGTTTTTTGGCAAGCAAAAGACGGCATACGAGATGTGTGTGTGTCAGTCAGTTTCGCCGTCTTCGT
ABCC5|NM_001023587|69	1431	10057	ABCC5	NM_001023587	69	TAGAAGACGCACCGGGAATTTGAAGTGATGGAGAATGTTAATATTCATAGCATTCTCCATCACTTCAGATTCTTTTTTGGCAAGCAAAAGACGGCATACGAGATCAGTGTGTGTCAGTCACATTCGCCGTCTTCGT
NR1H3|NM_001130101|70	1432	10062	NR1H3	NM_001130101	70	TAGAAGACGCACCGGGCAACTTAATGATGCTGAGTTGTTAATATTCATAGCAACTCGGCATCATTGAGTTGCTTTTTTGGCAAGCAAAAGACGGCATACGAGATTGGTGTGTGTCAGTCAACTTCGCCGTCTTCGT
NR1H3|NM_001130101|71	1433	10062	NR1H3	NM_001130101	71	TAGAAGACGCACCGGATGAATGAGCTGCAACTTAATGTTAATATTCATAGCATTGAGTTGCAGCTCATTCATTTTTTTGGCAAGCAAAAGACGGCATACGAGATACGTGTGTGTCAGTCATGTTCGCCGTCTTCGT
NR1H3|NM_001130101|72	1434	10062	NR1H3	NM_001130101	72	TAGAAGACGCACCGGGTATCACCTTCCTTAAGGATTGTTAATATTCATAGCAATCCTTGAGGAAGGTGATACTTTTTTGGCAAGCAAAAGACGGCATACGAGATCAGTGTGTGTCAGTACGTTTCGCCGTCTTCGT
NR1H3|NM_001130101|73	1435	10062	NR1H3	NM_001130101	73	TAGAAGACGCACCGGGTCCATTCAGAGTAAGTGTTTGTTAATATTCATAGCAAACACTTGCTCTGAGTGGACTTTTTTGGCAAGCAAAAGACGGCATACGAGATACGTGTGTGTCAGTACCATTCGCCGTCTTCGT
NR1H3|NM_001130101|74	1436	10062	NR1H3	NM_001130101	74	TAGAAGACGCACCGGAGATTTGGGATGTGCATGAATGTTAATATTCATAGCATTCGTGCACATCCCAGATCTTTTTTTGGCAAGCAAAAGACGGCATACGAGATGTGTGTGTGTCAGTACACTTCGCCGTCTTCGT
NR1H3|NM_001130101|75	1437	10062	NR1H3	NM_001130101	75	TAGAAGACGCACCGGCCTTCCTTAAGGATTTCAGTTGTTAATATTCATAGCAACTGAAATCCTTGAGGAAGGTTTTTTGGCAAGCAAAAGACGGCATACGAGATTGGTGTGTGTCAGTACTGTTCGCCGTCTTCGT
NR1H3|NM_001130101|76	1438	10062	NR1H3	NM_001130101	76	TAGAAGACGCACCGGCTGAAGAAATTGAAGCGGTAAGTTAATATTCATAGCTTGCCGCTTCAGTTTCTTCAGTTTTTTGGCAAGCAAAAGACGGCATACGAGATACGTGTGTGTCAGTTGGTTTCGCCGTCTTCGT
NR1H3|NM_001130101|77	1439	10062	NR1H3	NM_001130101	77	TAGAAGACGCACCGGCCGATTGATGTTCCCATGGATGTTAATATTCATAGCATCCGTGGGAACATCAGTCGGTTTTTTGGCAAGCAAAAGACGGCATACGAGATTGGTGTGTGTCAGTTGCATTCGCCGTCTTCGT
RASGRP1|NM_001128602|78	1440	10125	RASGRP1	NM_001128602	78	TAGAAGACGCACCGGGCTGCCTTTAAAGCAAGATTAGTTAATATTCATAGCTAGTCTTGCTTTAGAGGCAGCTTTTTTGGCAAGCAAAAGACGGCATACGAGATCAGTGTGTGTCAGTTGACTTCGCCGTCTTCGT
RASGRP1|NM_001128602|79	1441	10125	RASGRP1	NM_001128602	79	TAGAAGACGCACCGGCGGGAAAGTGAATGTCTATAAGTTAATATTCATAGCTTATGGACGTTCACTTTCCCGTTTTTTGGCAAGCAAAAGACGGCATACGAGATGTGTGTGTGTCAGTTGTGTTCGCCGTCTTCGT
RASGRP1|NM_001128602|80	1442	10125	RASGRP1	NM_001128602	80	TAGAAGACGCACCGGGCCCTAAAGATCCAATTGAAAGTTAATATTCATAGCTTTCAGTTGGATCTTTAGGGCTTTTTTGGCAAGCAAAAGACGGCATACGAGATACGTGTGTGTCACAGTGTTTCGCCGTCTTCGT
RASGRP1|NM_001128602|81	1443	10125	RASGRP1	NM_001128602	81	TAGAAGACGCACCGGCCTGATTGACACAACTTAAATGTTAATATTCATAGCATTTGAGTTGTGTCAATCAGGTTTTTTGGCAAGCAAAAGACGGCATACGAGATTGGTGTGTGTCACAGTCATTCGCCGTCTTCGT
RASGRP1|NM_001128602|82	1444	10125	RASGRP1	NM_001128602	82	TAGAAGACGCACCGGGATGGAAACTTGTGTTGAAGTGTTAATATTCATAGCACTTCGACACAGGTTTCCATCTTTTTTGGCAAGCAAAAGACGGCATACGAGATCAGTGTGTGTCACAGTACTTCGCCGTCTTCGT
RASGRP1|NM_001128602|83	1445	10125	RASGRP1	NM_001128602	83	TAGAAGACGCACCGGACAGCCCAGGATACTTTATATGTTAATATTCATAGCATATAGAGTATCCTGGGCTGTTTTTTTGGCAAGCAAAAGACGGCATACGAGATGTGTGTGTGTCACAGTTGTTCGCCGTCTTCGT
RASGRP1|NM_001128602|84	1446	10125	RASGRP1	NM_001128602	84	TAGAAGACGCACCGGGCAGATAATGATGCCTTAAAGGTTAATATTCATAGCCTTTAGGGCATCATTATCTGCTTTTTTGGCAAGCAAAAGACGGCATACGAGATTGGTGTGTGTCACACAGTTTCGCCGTCTTCGT
RASGRP1|NM_001128602|85	1447	10125	RASGRP1	NM_001128602	85	TAGAAGACGCACCGGGTTGTGTTTGGGTGTAAGGAGGTTAATATTCATAGCCTTCTTACACTCAAACACAACTTTTTTGGCAAGCAAAAGACGGCATACGAGATGTGTGTGTGTCACACACATTCGCCGTCTTCGT
TOB1|NM_001243877|86	1448	10140	TOB1	NM_001243877	86	TAGAAGACGCACCGGGCAGTATTCTAACCAGTAATTGTTAATATTCATAGCAATTGCTGGTTAGAATACTGCTTTTTTGGCAAGCAAAAGACGGCATACGAGATACGTGTGTGTCACACAACTTCGCCGTCTTCGT
TOB1|NM_001243877|87	1449	10140	TOB1	NM_001243877	87	TAGAAGACGCACCGGCCAGCTTGTTATGGCTAATTAGTTAATATTCATAGCTAGTTAGCCATAACAGGCTGGTTTTTTGGCAAGCAAAAGACGGCATACGAGATCAGTGTGTGTCACACATGTTCGCCGTCTTCGT
TOB1|NM_001243877|88	1450	10140	TOB1	NM_001243877	88	TAGAAGACGCACCGGGCAACAAGGTTGTACGTATTTGTTAATATTCATAGCAAGTACGTGCAACCTTGTTGCTTTTTTGGCAAGCAAAAGACGGCATACGAGATGTGTGTGTGTCACAACGTTTCGCCGTCTTCGT
TOB1|NM_001243877|89	1451	10140	TOB1	NM_001243877	89	TAGAAGACGCACCGGCGACCTATTTGAGGTTTCTTAGTTAATATTCATAGCTAAGAAACCTCAAATGGGTCGTTTTTTGGCAAGCAAAAGACGGCATACGAGATCAGTGTGTGTCACAACCATTCGCCGTCTTCGT
TOB1|NM_001243877|90	1452	10140	TOB1	NM_001243877	90	TAGAAGACGCACCGGCCAGGAGATGTGTCAATATTTGTTAATATTCATAGCAAATGTTGACACGTCTCCTGGTTTTTTGGCAAGCAAAAGACGGCATACGAGATTGGTGTGTGTCACAACACTTCGCCGTCTTCGT
TOB1|NM_001243877|91	1453	10140	TOB1	NM_001243877	91	TAGAAGACGCACCGGGGGACTAGTGAAGGTGCTTTGGTTAATATTCATAGCTAAAGCACCTTCACTGGTCCCTTTTTTGGCAAGCAAAAGACGGCATACGAGATACGTGTGTGTCACAACTGTTCGCCGTCTTCGT
TOB1|NM_001243877|92	1454	10140	TOB1	NM_001243877	92	TAGAAGACGCACCGGATGGAGGCCTTAATGAGAAATGTTAATATTCATAGCATTTCTCATTGAGGCCTCCATTTTTTTGGCAAGCAAAAGACGGCATACGAGATCAGTGTGTGTCACATGGTTTCGCCGTCTTCGT
TOB1|NM_001243877|93	1455	10140	TOB1	NM_001243877	93	TAGAAGACGCACCGGAGTCCTCTCCAGTATAGTAATGTTAATATTCATAGCATTACTGTACTGGAGAGGACTTTTTTTGGCAAGCAAAAGACGGCATACGAGATACGTGTGTGTCACATGCATTCGCCGTCTTCGT
ABI2|NM_005759|94	1456	10152	ABI2	NM_005759	94	TAGAAGACGCACCGGGCTGTGGTTGAGTGTAGTGGTGTTAATATTCATAGCATCACTATACTCAACCACAGCTTTTTTGGCAAGCAAAAGACGGCATACGAGATGTGTGTGTGTCACATGACTTCGCCGTCTTCGT
ABI2|NM_005759|95	1457	10152	ABI2	NM_005759	95	TAGAAGACGCACCGGGACATGGAGTAAGGGTGGGTAGTTAATATTCATAGCTACTCACCTTTACTCCATGTCTTTTTTGGCAAGCAAAAGACGGCATACGAGATTGGTGTGTGTCACATGTGTTCGCCGTCTTCGT
ABI2|NM_005759|96	1458	10152	ABI2	NM_005759	96	TAGAAGACGCACCGGACCTAGCTCAACCTGTAATATGTTAATATTCATAGCATATTACGGGTTGGGCTAGGTTTTTTTGGCAAGCAAAAGACGGCATACGAGATCAGTGTGTGTCAACGTGTTTCGCCGTCTTCGT
ABI2|NM_005759|97	1459	10152	ABI2	NM_005759	97	TAGAAGACGCACCGGGATGTTGTTGGAAGAGGAAATGTTAATATTCATAGCATTTCCTCTTCCAGCAGCATCTTTTTTGGCAAGCAAAAGACGGCATACGAGATACGTGTGTGTCAACGTCATTCGCCGTCTTCGT
ABI2|NM_005759|98	1460	10152	ABI2	NM_005759	98	TAGAAGACGCACCGGGAAGTTGTTGTGGTTGAGTATGTTAATATTCATAGCATACTCAACCACAGCAGCTTCTTTTTTGGCAAGCAAAAGACGGCATACGAGATGTGTGTGTGTCAACGTACTTCGCCGTCTTCGT
ABI2|NM_005759|99	1461	10152	ABI2	NM_005759	99	TAGAAGACGCACCGGGAGCCTTAGAAGAAACTAAAGGTTAATATTCATAGCCTTTGGTTTCTTCTAGGGCTCTTTTTTGGCAAGCAAAAGACGGCATACGAGATTGGTGTGTGTCAACGTTGTTCGCCGTCTTCGT
ABI2|NM_005759|100	1462	10152	ABI2	NM_005759	100	TAGAAGACGCACCGGCTCTTCGACAGCTACATAAATGTTAATATTCATAGCATTTGTGTAGCTGTCGAAGAGTTTTTTGGCAAGCAAAAGACGGCATACGAGATACGTGTGTGTCAACCAGTTTCGCCGTCTTCGT
ABI2|NM_005759|101	1463	10152	ABI2	NM_005759	101	TAGAAGACGCACCGGCACTTCAAGGACATATAAGATGTTAATATTCATAGCATCTTATGTGTCCTTGAAGTGTTTTTTGGCAAGCAAAAGACGGCATACGAGATTGGTGTGTGTCAACCACATTCGCCGTCTTCGT
CDK2|NM_001798|102	1464	1017	CDK2	NM_001798	102	TAGAAGACGCACCGGGCCTGATTACAAGCTAAGTTTGTTAATATTCATAGCAAACTTGGCTTGTAATCAGGCTTTTTTGGCAAGCAAAAGACGGCATACGAGATCAGTGTGTGTCAACCAACTTCGCCGTCTTCGT
CDK2|NM_001798|103	1465	1017	CDK2	NM_001798	103	TAGAAGACGCACCGGACGACCTTAACAAGTGGATTTGTTAATATTCATAGCAAATCCGCTTGTTAGGGTCGTTTTTTTGGCAAGCAAAAGACGGCATACGAGATGTGTGTGTGTCAACCATGTTCGCCGTCTTCGT
CDK2|NM_001798|104	1466	1017	CDK2	NM_001798	104	TAGAAGACGCACCGGCTATGCCTGATTACAAGTCAAGTTAATATTCATAGCTTGGCTTGTAATCAGGCATAGTTTTTTGGCAAGCAAAAGACGGCATACGAGATTGGTGTGTGTCAACACGTTTCGCCGTCTTCGT
CDK2|NM_001798|105	1467	1017	CDK2	NM_001798	105	TAGAAGACGCACCGGCTCCTGGGCTGTAAATATTATGTTAATATTCATAGCATAATATTTGCAGCCCAGGAGTTTTTTGGCAAGCAAAAGACGGCATACGAGATGTGTGTGTGTCAACACCATTCGCCGTCTTCGT
CDK2|NM_001798|106	1468	1017	CDK2	NM_001798	106	TAGAAGACGCACCGGGCCATTAAGCTAGTAGACTTTGTTAATATTCATAGCAAAGTCTGCTAGCTTGATGGCTTTTTTGGCAAGCAAAAGACGGCATACGAGATACGTGTGTGTCAACACACTTCGCCGTCTTCGT
CDK2|NM_001798|107	1469	1017	CDK2	NM_001798	107	TAGAAGACGCACCGGCCGAGAGATTTCTCTGTTTAAGTTAATATTCATAGCTTAAGCAGAGAGATCTCTCGGTTTTTTGGCAAGCAAAAGACGGCATACGAGATCAGTGTGTGTCAACACTGTTCGCCGTCTTCGT
CDK2|NM_001798|108	1470	1017	CDK2	NM_001798	108	TAGAAGACGCACCGGACGGAGCTTGTTATCGTAAATGTTAATATTCATAGCATTTGCGATAACAAGCTCCGTTTTTTTGGCAAGCAAAAGACGGCATACGAGATGTGTGTGTGTCAACTGGTTTCGCCGTCTTCGT
CDK2|NM_001798|109	1471	1017	CDK2	NM_001798	109	TAGAAGACGCACCGGCCTCAGAATCTGCTTATTAATGTTAATATTCATAGCGTTAATAAGCAGATTCTGAGGTTTTTTGGCAAGCAAAAGACGGCATACGAGATCAGTGTGTGTCAACTGCATTCGCCGTCTTCGT
CDK4|NM_000075|110	1472	1019	CDK4	NM_000075	110	TAGAAGACGCACCGGCCTAGATTTCCTTCATGTCAAGTTAATATTCATAGCTTGGCATGAAGGAAATCTAGGTTTTTTGGCAAGCAAAAGACGGCATACGAGATTGGTGTGTGTCAACTGACTTCGCCGTCTTCGT
CDK4|NM_000075|111	1473	1019	CDK4	NM_000075	111	TAGAAGACGCACCGGGAAATTGGTGTTGGTGCTTATGTTAATATTCATAGCATAGGCACCGACACCAATTTCTTTTTTGGCAAGCAAAAGACGGCATACGAGATACGTGTGTGTCAACTGTGTTCGCCGTCTTCGT
CDK4|NM_000075|112	1474	1019	CDK4	NM_000075	112	TAGAAGACGCACCGGAGGACATATTTGGACAAGGTAGTTAATATTCATAGCTGCCTTGTCCAGATATGTCCTTTTTTTGGCAAGCAAAAGACGGCATACGAGATGTGTGTGTGTCATGGTGTTTCGCCGTCTTCGT
CDK4|NM_000075|113	1475	1019	CDK4	NM_000075	113	TAGAAGACGCACCGGACAGTTTGTGAGGTGGCTTTGGTTAATATTCATAGCTAAAGCCACCTCACGAACTGTTTTTTTGGCAAGCAAAAGACGGCATACGAGATCAGTGTGTGTCATGGTCATTCGCCGTCTTCGT
CDK4|NM_000075|114	1476	1019	CDK4	NM_000075	114	TAGAAGACGCACCGGGATGATTGGCCTTGAGATGTAGTTAATATTCATAGCTACATCTCGAGGCCAGTCATCTTTTTTGGCAAGCAAAAGACGGCATACGAGATTGGTGTGTGTCATGGTACTTCGCCGTCTTCGT
CDK4|NM_000075|115	1477	1019	CDK4	NM_000075	115	TAGAAGACGCACCGGCATGCCAATTGTATCGTTTACGTTAATATTCATAGCGTGAACGATGCAATTGGCATGTTTTTTGGCAAGCAAAAGACGGCATACGAGATACGTGTGTGTCATGGTTGTTCGCCGTCTTCGT
CDK4|NM_000075|116	1478	1019	CDK4	NM_000075	116	TAGAAGACGCACCGGGTTCTTCTGCAGTCCATATATGTTAATATTCATAGCATATGTGGACTGCAGAAGAACTTTTTTGGCAAGCAAAAGACGGCATACGAGATCAGTGTGTGTCATGCAGTTTCGCCGTCTTCGT
CDK4|NM_000075|117	1479	1019	CDK4	NM_000075	117	TAGAAGACGCACCGGGTGGGGTGTTGGTTGTATCTTGTTAATATTCATAGCAAGATACAGCCAACACTCCACTTTTTTGGCAAGCAAAAGACGGCATACGAGATACGTGTGTGTCATGCACATTCGCCGTCTTCGT
PSME3|NM_001267045|118	1480	10197	PSME3	NM_001267045	118	TAGAAGACGCACCGGGCATCTTATCTGGACTAGATTGTTAATATTCATAGCAATCTGGTCCAGATAAGATGCTTTTTTGGCAAGCAAAAGACGGCATACGAGATGTGTGTGTGTCATGCAACTTCGCCGTCTTCGT
PSME3|NM_001267045|119	1481	10197	PSME3	NM_001267045	119	TAGAAGACGCACCGGCGAAGGTTGGATGGGTGTGGAGTTAATATTCATAGCTTCACACTCATCCAACCTTCGTTTTTTGGCAAGCAAAAGACGGCATACGAGATTGGTGTGTGTCATGCATGTTCGCCGTCTTCGT
PSME3|NM_001267045|120	1482	10197	PSME3	NM_001267045	120	TAGAAGACGCACCGGACTGGATGGTCCCATTTATAAGTTAATATTCATAGCTTATAAGTGGGACCATCCAGTTTTTTTGGCAAGCAAAAGACGGCATACGAGATACGTGTGTGTCATGACGTTTCGCCGTCTTCGT
PSME3|NM_001267045|121	1483	10197	PSME3	NM_001267045	121	TAGAAGACGCACCGGAAGGTGTTTGTGATGCTCAATGTTAATATTCATAGCATTGGGCATCACAAACACCTTTTTTTTGGCAAGCAAAAGACGGCATACGAGATTGGTGTGTGTCATGACCATTCGCCGTCTTCGT
PSME3|NM_001267045|122	1484	10197	PSME3	NM_001267045	122	TAGAAGACGCACCGGGGTGGATATTATTGAGAAAGTGTTAATATTCATAGCACTTTCTCAATAATGTCCACCTTTTTTGGCAAGCAAAAGACGGCATACGAGATCAGTGTGTGTCATGACACTTCGCCGTCTTCGT
PSME3|NM_001267045|123	1485	10197	PSME3	NM_001267045	123	TAGAAGACGCACCGGGGATAGAAGATGGAAATAACTGTTAATATTCATAGCAGTTGTTTCCATCTTCTATCCTTTTTTGGCAAGCAAAAGACGGCATACGAGATGTGTGTGTGTCATGACTGTTCGCCGTCTTCGT
PSME3|NM_001267045|124	1486	10197	PSME3	NM_001267045	124	TAGAAGACGCACCGGCAGGCAAAGGTCCTTATATATGTTAATATTCATAGCATATATGAGGACCTTTGCCTGTTTTTTGGCAAGCAAAAGACGGCATACGAGATTGGTGTGTGTCATGTGGTTTCGCCGTCTTCGT
CDK6|NM_001145306|125	1487	1021	CDK6	NM_001145306	125	TAGAAGACGCACCGGCGAACAGACAGAGAAATCAAAGTTAATATTCATAGCTTTGGTTTCTCTGTCTGTTCGTTTTTTGGCAAGCAAAAGACGGCATACGAGATGTGTGTGTGTCATGTGCATTCGCCGTCTTCGT
CDK6|NM_001145306|126	1488	1021	CDK6	NM_001145306	126	TAGAAGACGCACCGGCAGACAGAGAAACCAAATTAAGTTAATATTCATAGCTTAGTTTGGTTTCTCTGTCTGTTTTTTGGCAAGCAAAAGACGGCATACGAGATACGTGTGTGTCATGTGACTTCGCCGTCTTCGT
CDK6|NM_001145306|127	1489	1021	CDK6	NM_001145306	127	TAGAAGACGCACCGGTCGATGAACTAGGTAAAGATCGTTAATATTCATAGCGGTCTTTGCCTAGTTCATCGATTTTTTGGCAAGCAAAAGACGGCATACGAGATCAGTGTGTGTCATGTGTGTTCGCCGTCTTCGT
CDK6|NM_001145306|128	1490	1021	CDK6	NM_001145306	128	TAGAAGACGCACCGGCAACCAATTGAGAAGTTTGTAGTTAATATTCATAGCTACAAACTTCTCAATTGGTTGTTTTTTGGCAAGCAAAAGACGGCATACGAGATCAGTGTGTGTACGTGTGTTTCGCCGTCTTCGT
CDK6|NM_001145306|129	1491	1021	CDK6	NM_001145306	129	TAGAAGACGCACCGGCTTCTGAAGTGTTTGACATTTGTTAATATTCATAGCAAATGTCAAACACTTCAGAAGTTTTTTGGCAAGCAAAAGACGGCATACGAGATACGTGTGTGTACGTGTCATTCGCCGTCTTCGT
CDK6|NM_001145306|130	1492	1021	CDK6	NM_001145306	130	TAGAAGACGCACCGGCGTGGAAGTTTAGATGTTGATGTTAATATTCATAGCATCAACATCTGAACTTCCACGTTTTTTGGCAAGCAAAAGACGGCATACGAGATGTGTGTGTGTACGTGTACTTCGCCGTCTTCGT
CDK6|NM_001145306|131	1493	1021	CDK6	NM_001145306	131	TAGAAGACGCACCGGTCTGGAGTGTTGGTTGTATATGTTAATATTCATAGCATATGCAGCCAACACTCCAGATTTTTTGGCAAGCAAAAGACGGCATACGAGATTGGTGTGTGTACGTGTTGTTCGCCGTCTTCGT
TOPORS|NM_001195622|132	1494	10210	TOPORS	NM_001195622	132	TAGAAGACGCACCGGGCAGAAATAGAGATCGTTATTGTTAATATTCATAGCAATAACGATCTCTATTTCTGCTTTTTTGGCAAGCAAAAGACGGCATACGAGATACGTGTGTGTACGTCAGTTTCGCCGTCTTCGT
TOPORS|NM_001195622|133	1495	10210	TOPORS	NM_001195622	133	TAGAAGACGCACCGGGTGGTCGCTATAGGGATATTTGTTAATATTCATAGCAAATATCCCTGTAGCGGCCACTTTTTTGGCAAGCAAAAGACGGCATACGAGATTGGTGTGTGTACGTCACATTCGCCGTCTTCGT
TOPORS|NM_001195622|134	1496	10210	TOPORS	NM_001195622	134	TAGAAGACGCACCGGAGACCCAAGAGTTGGATATTAGTTAATATTCATAGCTAATATCCAGCTCTTGGGTCTTTTTTTGGCAAGCAAAAGACGGCATACGAGATCAGTGTGTGTACGTCAACTTCGCCGTCTTCGT
TOPORS|NM_001195622|135	1497	10210	TOPORS	NM_001195622	135	TAGAAGACGCACCGGGCTGGATAAGGAATGTGATATGTTAATATTCATAGCATATCACATTCCTTGTCCAGCTTTTTTGGCAAGCAAAAGACGGCATACGAGATGTGTGTGTGTACGTCATGTTCGCCGTCTTCGT
TOPORS|NM_001195622|136	1498	10210	TOPORS	NM_001195622	136	TAGAAGACGCACCGGATCGCCACGGACATTATTAATGTTAATATTCATAGCATTAATGATGTCCGTGGCGATTTTTTTGGCAAGCAAAAGACGGCATACGAGATTGGTGTGTGTACGTACGTTTCGCCGTCTTCGT
TOPORS|NM_001195622|137	1499	10210	TOPORS	NM_001195622	137	TAGAAGACGCACCGGGTAAGAGGAGATAGAGTATATGTTAATATTCATAGCATATACTCTGTCTCCTCTTACTTTTTTGGCAAGCAAAAGACGGCATACGAGATGTGTGTGTGTACGTACCATTCGCCGTCTTCGT
TOPORS|NM_001195622|138	1500	10210	TOPORS	NM_001195622	138	TAGAAGACGCACCGGGAGACCTAAGAGTTGGATATTGTTAATATTCATAGCAATATCCAGCTCTTGGGTCTCTTTTTTGGCAAGCAAAAGACGGCATACGAGATACGTGTGTGTACGTACACTTCGCCGTCTTCGT
TOPORS|NM_001195622|139	1501	10210	TOPORS	NM_001195622	139	TAGAAGACGCACCGGAGTGGGCATGATTAGAAGAATGTTAATATTCATAGCATTCTTCTGATCATGCCCACTTTTTTTGGCAAGCAAAAGACGGCATACGAGATCAGTGTGTGTACGTACTGTTCGCCGTCTTCGT
FLOT1|NM_005803|140	1502	10211	FLOT1	NM_005803	140	TAGAAGACGCACCGGCCAGGACTATTTGCATTCTTTGTTAATATTCATAGCAAAGAGTGCAAATAGTCCTGGTTTTTTGGCAAGCAAAAGACGGCATACGAGATGTGTGTGTGTACGTTGGTTTCGCCGTCTTCGT
FLOT1|NM_005803|141	1503	10211	FLOT1	NM_005803	141	TAGAAGACGCACCGGCCAGGTGAATTACAAGTCTTTGTTAATATTCATAGCAAAGGCTTGTGATTCACCTGGTTTTTTGGCAAGCAAAAGACGGCATACGAGATCAGTGTGTGTACGTTGCATTCGCCGTCTTCGT
FLOT1|NM_005803|142	1504	10211	FLOT1	NM_005803	142	TAGAAGACGCACCGGCCCTCAATGTTAAGAGTGAAAGTTAATATTCATAGCTTTCACTCTTGACATTGAGGGTTTTTTGGCAAGCAAAAGACGGCATACGAGATTGGTGTGTGTACGTTGACTTCGCCGTCTTCGT
FLOT1|NM_005803|143	1505	10211	FLOT1	NM_005803	143	TAGAAGACGCACCGGGCAGAGAAGTCCCAATTAATTGTTAATATTCATAGCAATTAGTTGGGACTTCTCTGCTTTTTTGGCAAGCAAAAGACGGCATACGAGATACGTGTGTGTACGTTGTGTTCGCCGTCTTCGT
FLOT1|NM_005803|144	1506	10211	FLOT1	NM_005803	144	TAGAAGACGCACCGGACAGAGAGATTACGAATTGAAGTTAATATTCATAGCTTCAGTTCGTAATCTCTCTGTTTTTTTGGCAAGCAAAAGACGGCATACGAGATGTGTGTGTGTACCAGTGTTTCGCCGTCTTCGT
FLOT1|NM_005803|145	1507	10211	FLOT1	NM_005803	145	TAGAAGACGCACCGGCACGATGATCAGGATTATTTGGTTAATATTCATAGCCAAATAGTCCTGGTCATCGTGTTTTTTGGCAAGCAAAAGACGGCATACGAGATCAGTGTGTGTACCAGTCATTCGCCGTCTTCGT
FLOT1|NM_005803|146	1508	10211	FLOT1	NM_005803	146	TAGAAGACGCACCGGTGACTGTGGAGGAGATTTATAGTTAATATTCATAGCTATAGATCTCCTCCACAGTCATTTTTTGGCAAGCAAAAGACGGCATACGAGATTGGTGTGTGTACCAGTACTTCGCCGTCTTCGT
FLOT1|NM_005803|147	1509	10211	FLOT1	NM_005803	147	TAGAAGACGCACCGGGGCAGAGAAGTTCCAATTAATGTTAATATTCATAGCATTAGTTGGGACTTCTCTGCCTTTTTTGGCAAGCAAAAGACGGCATACGAGATACGTGTGTGTACCAGTTGTTCGCCGTCTTCGT
CTDSPL|NM_001008392|148	1510	10217	CTDSPL	NM_001008392	148	TAGAAGACGCACCGGCCAGTGCAATGTCAGTTTAAAGTTAATATTCATAGCTTTAAGCTGACGTTGCACTGGTTTTTTGGCAAGCAAAAGACGGCATACGAGATCAGTGTGTGTACCACAGTTTCGCCGTCTTCGT
CTDSPL|NM_001008392|149	1511	10217	CTDSPL	NM_001008392	149	TAGAAGACGCACCGGGATGAAACATTGGTGCATAGTGTTAATATTCATAGCACTGTGCACCAATGTTTCATCTTTTTTGGCAAGCAAAAGACGGCATACGAGATACGTGTGTGTACCACACATTCGCCGTCTTCGT
CTDSPL|NM_001008392|150	1512	10217	CTDSPL	NM_001008392	150	TAGAAGACGCACCGGTGCTGCTTCCGTGATTATAATGTTAATATTCATAGCATTGTAATCACGGAAGCAGCATTTTTTGGCAAGCAAAAGACGGCATACGAGATGTGTGTGTGTACCACAACTTCGCCGTCTTCGT
CTDSPL|NM_001008392|151	1513	10217	CTDSPL	NM_001008392	151	TAGAAGACGCACCGGGTGCAACGTCAGTTTAAAGAAGTTAATATTCATAGCTTCTTTAAGCTGACGTTGCACTTTTTTGGCAAGCAAAAGACGGCATACGAGATTGGTGTGTGTACCACATGTTCGCCGTCTTCGT
CTDSPL|NM_001008392|152	1514	10217	CTDSPL	NM_001008392	152	TAGAAGACGCACCGGCAGGTCATTCTCATACTAAGTGTTAATATTCATAGCACTTGGTATGGGAATGACCTGTTTTTTGGCAAGCAAAAGACGGCATACGAGATACGTGTGTGTACCAACGTTTCGCCGTCTTCGT
CTDSPL|NM_001008392|153	1515	10217	CTDSPL	NM_001008392	153	TAGAAGACGCACCGGTTCAGAAGCTACCAGTTAAGTGTTAATATTCATAGCACTTAGCTGGTGGCTTCTGAATTTTTTGGCAAGCAAAAGACGGCATACGAGATTGGTGTGTGTACCAACCATTCGCCGTCTTCGT
CTDSPL|NM_001008392|154	1516	10217	CTDSPL	NM_001008392	154	TAGAAGACGCACCGGTGACGGTGTTTGATTATGGAAGTTAATATTCATAGCTTCCATAGTCAAGCACCGTCATTTTTTGGCAAGCAAAAGACGGCATACGAGATCAGTGTGTGTACCAACACTTCGCCGTCTTCGT
CTDSPL|NM_001008392|155	1517	10217	CTDSPL	NM_001008392	155	TAGAAGACGCACCGGGCACAGTTCGTTTAAGTCTATGTTAATATTCATAGCATAGGCTTAAACGAACTGTGCTTTTTTGGCAAGCAAAAGACGGCATACGAGATGTGTGTGTGTACCAACTGTTCGCCGTCTTCGT
CD96|NM_005816|156	1518	10225	CD96	NM_005816	156	TAGAAGACGCACCGGCCAGTGATTGTAGTAGCTTTAGTTAATATTCATAGCTAAAGCTGCTACAATCACTGGTTTTTTGGCAAGCAAAAGACGGCATACGAGATTGGTGTGTGTACCATGGTTTCGCCGTCTTCGT
CD96|NM_005816|157	1519	10225	CD96	NM_005816	157	TAGAAGACGCACCGGAGTGGAAGGTATGAGTGTGTGGTTAATATTCATAGCCATACACTCGTACCTTCCACTTTTTTTGGCAAGCAAAAGACGGCATACGAGATGTGTGTGTGTACCATGCATTCGCCGTCTTCGT
CD96|NM_005816|158	1520	10225	CD96	NM_005816	158	TAGAAGACGCACCGGGAAAGTGATCTGCCTTATTATGTTAATATTCATAGCATGATAAGGCAGATCACTTTCTTTTTTGGCAAGCAAAAGACGGCATACGAGATACGTGTGTGTACCATGACTTCGCCGTCTTCGT
CD96|NM_005816|159	1521	10225	CD96	NM_005816	159	TAGAAGACGCACCGGGAGTCAAGTTTGGTACAGATTGTTAATATTCATAGCAGTCTGTACCAAGCTTGACTCTTTTTTGGCAAGCAAAAGACGGCATACGAGATCAGTGTGTGTACCATGTGTTCGCCGTCTTCGT
CD96|NM_005816|160	1522	10225	CD96	NM_005816	160	TAGAAGACGCACCGGGTGGTCAATAAGCCTAAAGATGTTAATATTCATAGCATCTTTGGGCTTATTGACCACTTTTTTGGCAAGCAAAAGACGGCATACGAGATTGGTGTGTGTACACGTGTTTCGCCGTCTTCGT
CD96|NM_005816|161	1523	10225	CD96	NM_005816	161	TAGAAGACGCACCGGGACCTGATTGCTGTCTATTATGTTAATATTCATAGCATGATAGACAGCAATCAGGTCTTTTTTGGCAAGCAAAAGACGGCATACGAGATGTGTGTGTGTACACGTCATTCGCCGTCTTCGT
CD96|NM_005816|162	1524	10225	CD96	NM_005816	162	TAGAAGACGCACCGGGGATAATGGAACTTAGGAAACGTTAATATTCATAGCGTTTCCTGAGTTCCATTATCCTTTTTTGGCAAGCAAAAGACGGCATACGAGATACGTGTGTGTACACGTACTTCGCCGTCTTCGT
CD96|NM_005816|163	1525	10225	CD96	NM_005816	163	TAGAAGACGCACCGGGGAAATACTGTGCTGTTTATTGTTAATATTCATAGCAATAGACAGCACAGTATTTCCTTTTTTGGCAAGCAAAAGACGGCATACGAGATCAGTGTGTGTACACGTTGTTCGCCGTCTTCGT
GPHN|NM_001024218|164	1526	10243	GPHN	NM_001024218	164	TAGAAGACGCACCGGGAGTCCTTATAGTGAGTGATAGTTAATATTCATAGCTATCACTCACTGTAAGGACTCTTTTTTGGCAAGCAAAAGACGGCATACGAGATGTGTGTGTGTACACCAGTTTCGCCGTCTTCGT
GPHN|NM_001024218|165	1527	10243	GPHN	NM_001024218	165	TAGAAGACGCACCGGCCAGAATACCATTGGTGTATAGTTAATATTCATAGCTATACACCGATGGTATTCTGGTTTTTTGGCAAGCAAAAGACGGCATACGAGATCAGTGTGTGTACACCACATTCGCCGTCTTCGT
GPHN|NM_001024218|166	1528	10243	GPHN	NM_001024218	166	TAGAAGACGCACCGGCAGTCATAGTGCTGTTGATATGTTAATATTCATAGCATATCGACAGCACTGTGACTGTTTTTTGGCAAGCAAAAGACGGCATACGAGATTGGTGTGTGTACACCAACTTCGCCGTCTTCGT
GPHN|NM_001024218|167	1529	10243	GPHN	NM_001024218	167	TAGAAGACGCACCGGGTGCATGATGAATTTGAAGATGTTAATATTCATAGCATCTTCAAGTTCATCATGCACTTTTTTGGCAAGCAAAAGACGGCATACGAGATACGTGTGTGTACACCATGTTCGCCGTCTTCGT
GPHN|NM_001024218|168	1530	10243	GPHN	NM_001024218	168	TAGAAGACGCACCGGGAAGAACTTGAAGTGTGAATTGTTAATATTCATAGCAATTCGCACTTCAAGTTCTTCTTTTTTGGCAAGCAAAAGACGGCATACGAGATCAGTGTGTGTACACACGTTTCGCCGTCTTCGT
GPHN|NM_001024218|169	1531	10243	GPHN	NM_001024218	169	TAGAAGACGCACCGGGGGAAGATTTGAGACAGTAATGTTAATATTCATAGCATTGCTGTCTCGAATCTTCCCTTTTTTGGCAAGCAAAAGACGGCATACGAGATACGTGTGTGTACACACCATTCGCCGTCTTCGT
GPHN|NM_001024218|170	1532	10243	GPHN	NM_001024218	170	TAGAAGACGCACCGGACAGGGAATGAGCTGTTAAATGTTAATATTCATAGCATTTAGCAGCTCATTCCCTGTTTTTTTGGCAAGCAAAAGACGGCATACGAGATGTGTGTGTGTACACACACTTCGCCGTCTTCGT
SPRY1|NM_001258038|171	1533	10252	SPRY1	NM_001258038	171	TAGAAGACGCACCGGGCATGAAAGGACTTATGAAATGTTAATATTCATAGCATTTCATGAGTCCTTTCATGCTTTTTTGGCAAGCAAAAGACGGCATACGAGATTGGTGTGTGTACACACTGTTCGCCGTCTTCGT
SPRY1|NM_001258038|172	1534	10252	SPRY1	NM_001258038	172	TAGAAGACGCACCGGGTGCTTAGTTAAGGGTATCTTGTTAATATTCATAGCAAGATGCCCTTGACTAAGCACTTTTTTGGCAAGCAAAAGACGGCATACGAGATACGTGTGTGTACACTGGTTTCGCCGTCTTCGT
SPRY1|NM_001258038|173	1535	10252	SPRY1	NM_001258038	173	TAGAAGACGCACCGGAGCTGTGTAGGAGGTGTTGTGGTTAATATTCATAGCCATAACACCTCCTGCACAGCTTTTTTTGGCAAGCAAAAGACGGCATACGAGATTGGTGTGTGTACACTGCATTCGCCGTCTTCGT
SPRY1|NM_001258038|174	1536	10252	SPRY1	NM_001258038	174	TAGAAGACGCACCGGGCAGCAATGAATACATAGAAGGTTAATATTCATAGCCTTCTGTGTATTCATTGCTGCTTTTTTGGCAAGCAAAAGACGGCATACGAGATCAGTGTGTGTACACTGACTTCGCCGTCTTCGT
SPRY1|NM_001258038|175	1537	10252	SPRY1	NM_001258038	175	TAGAAGACGCACCGGCATGCAGTACTCCTAAGTAATGTTAATATTCATAGCATTACTTGGGAGTACTGCATGTTTTTTGGCAAGCAAAAGACGGCATACGAGATGTGTGTGTGTACACTGTGTTCGCCGTCTTCGT
SPRY1|NM_001258038|176	1538	10252	SPRY1	NM_001258038	176	TAGAAGACGCACCGGGCTGAGAGTATGGTGGAATGTGTTAATATTCATAGCATATTCCACCATGCTCTCAGCTTTTTTGGCAAGCAAAAGACGGCATACGAGATACGTGTGTGTACTGGTGTTTCGCCGTCTTCGT
SPRY1|NM_001258038|177	1539	10252	SPRY1	NM_001258038	177	TAGAAGACGCACCGGTCATAGGTCTGAAAGGGTAATGTTAATATTCATAGCATTGCCCTTTCAGACCTATGATTTTTTGGCAAGCAAAAGACGGCATACGAGATTGGTGTGTGTACTGGTCATTCGCCGTCTTCGT
SPRY1|NM_001258038|178	1540	10252	SPRY1	NM_001258038	178	TAGAAGACGCACCGGATAGCCGTCAGAGATTAGATTGTTAATATTCATAGCAGTCTAATCTCTGACGGCTATTTTTTTGGCAAGCAAAAGACGGCATACGAGATCAGTGTGTGTACTGGTACTTCGCCGTCTTCGT
ABCC4|NM_001105515|179	1541	10257	ABCC4	NM_001105515	179	TAGAAGACGCACCGGGCACTCATTAAATCACAAGAAGTTAATATTCATAGCTTCTTGTGATTTAATGAGTGCTTTTTTGGCAAGCAAAAGACGGCATACGAGATGTGTGTGTGTACTGGTTGTTCGCCGTCTTCGT
ABCC4|NM_001105515|180	1542	10257	ABCC4	NM_001105515	180	TAGAAGACGCACCGGGCTCTGGTATTATTCTTTGATGTTAATATTCATAGCATCAAAGAATAATACCGGAGCTTTTTTGGCAAGCAAAAGACGGCATACGAGATTGGTGTGTGTACTGCAGTTTCGCCGTCTTCGT
ABCC4|NM_001105515|181	1543	10257	ABCC4	NM_001105515	181	TAGAAGACGCACCGGGTTGCCTATGTGCTTTAAGATGTTAATATTCATAGCATCTTGAAGCACATAGGCAACTTTTTTGGCAAGCAAAAGACGGCATACGAGATGTGTGTGTGTACTGCACATTCGCCGTCTTCGT
ABCC4|NM_001105515|182	1544	10257	ABCC4	NM_001105515	182	TAGAAGACGCACCGGCGTGATTCTTTGGATCGTAATGTTAATATTCATAGCATTGCGATCCAAGGAATCACGTTTTTTGGCAAGCAAAAGACGGCATACGAGATACGTGTGTGTACTGCAACTTCGCCGTCTTCGT
ABCC4|NM_001105515|183	1545	10257	ABCC4	NM_001105515	183	TAGAAGACGCACCGGCAAAGTGTTGAAGTTGAGAATGTTAATATTCATAGCATTCTCAACTTCAGCACTTTGTTTTTTGGCAAGCAAAAGACGGCATACGAGATCAGTGTGTGTACTGCATGTTCGCCGTCTTCGT
ABCC4|NM_001105515|184	1546	10257	ABCC4	NM_001105515	184	TAGAAGACGCACCGGAAAGAAGCACTTTGGGAATATGTTAATATTCATAGCATATTCCCAAGGTGCTTCTTTTTTTTTGGCAAGCAAAAGACGGCATACGAGATGTGTGTGTGTACTGACGTTTCGCCGTCTTCGT
ABCC4|NM_001105515|185	1547	10257	ABCC4	NM_001105515	185	TAGAAGACGCACCGGGCAAGAGCAGTGTATTAAGATGTTAATATTCATAGCATCTTGATACACTGCTCTTGCTTTTTTGGCAAGCAAAAGACGGCATACGAGATCAGTGTGTGTACTGACCATTCGCCGTCTTCGT
ABCC4|NM_001105515|186	1548	10257	ABCC4	NM_001105515	186	TAGAAGACGCACCGGACAGCCCTCGATCTTAATTATGTTAATATTCATAGCATAGTTAAGGTCGAGGGCTGTTTTTTTGGCAAGCAAAAGACGGCATACGAGATTGGTGTGTGTACTGACACTTCGCCGTCTTCGT
IRX5|NM_001252197|187	1549	10265	IRX5	NM_001252197	187	TAGAAGACGCACCGGGAAAGGTATGTCCGATATTTAGTTAATATTCATAGCTAAATGTCGGACATACCTTTCTTTTTTGGCAAGCAAAAGACGGCATACGAGATACGTGTGTGTACTGACTGTTCGCCGTCTTCGT
IRX5|NM_001252197|188	1550	10265	IRX5	NM_001252197	188	TAGAAGACGCACCGGGCAAAGACTCTCCTTATGAATGTTAATATTCATAGCATTCATAGGGAGAGTCTTTGCTTTTTTGGCAAGCAAAAGACGGCATACGAGATCAGTGTGTGTACTGTGGTTTCGCCGTCTTCGT
IRX5|NM_001252197|189	1551	10265	IRX5	NM_001252197	189	TAGAAGACGCACCGGCGCCTTAAGAAAGAGAATAAAGTTAATATTCATAGCTTTATTCTCTTTCTTGAGGCGTTTTTTGGCAAGCAAAAGACGGCATACGAGATACGTGTGTGTACTGTGCATTCGCCGTCTTCGT
IRX5|NM_001252197|190	1552	10265	IRX5	NM_001252197	190	TAGAAGACGCACCGGAGAAAGGTATGTCCGATATTTGTTAATATTCATAGCAAATGTCGGACATACCTTTCTTTTTTTGGCAAGCAAAAGACGGCATACGAGATGTGTGTGTGTACTGTGACTTCGCCGTCTTCGT
IRX5|NM_001252197|191	1553	10265	IRX5	NM_001252197	191	TAGAAGACGCACCGGCGTACAGCACTAGCGTTATTTGTTAATATTCATAGCAAATGACGCTGGTGCTGTACGTTTTTTGGCAAGCAAAAGACGGCATACGAGATTGGTGTGTGTACTGTGTGTTCGCCGTCTTCGT
IRX5|NM_001252197|192	1554	10265	IRX5	NM_001252197	192	TAGAAGACGCACCGGGTCTCATTTCAATGGATTAAAGTTAATATTCATAGCTTTAATCCATTGAAATGAGACTTTTTTGGCAAGCAAAAGACGGCATACGAGATACGTGTGTGTTGGTGTGTTTCGCCGTCTTCGT
IRX5|NM_001252197|193	1555	10265	IRX5	NM_001252197	193	TAGAAGACGCACCGGGAGGAAGGGGAGGAGAATATTGTTAATATTCATAGCAATGTTCTCCTCCTCTTCCTCTTTTTTGGCAAGCAAAAGACGGCATACGAGATTGGTGTGTGTTGGTGTCATTCGCCGTCTTCGT
IRX5|NM_001252197|194	1556	10265	IRX5	NM_001252197	194	TAGAAGACGCACCGGGCGCCTTAAGAAAGAGAATAAGTTAATATTCATAGCTTATTCTCTTTCTTGAGGCGCTTTTTTGGCAAGCAAAAGACGGCATACGAGATCAGTGTGTGTTGGTGTACTTCGCCGTCTTCGT
CDKN1B|NM_004064|195	1557	1027	CDKN1B	NM_004064	195	TAGAAGACGCACCGGGAGCAATGCGTAGGAATAGGGGTTAATATTCATAGCCCTTATTCCTGCGCATTGCTCTTTTTTGGCAAGCAAAAGACGGCATACGAGATGTGTGTGTGTTGGTGTTGTTCGCCGTCTTCGT
CDKN1B|NM_004064|196	1558	1027	CDKN1B	NM_004064	196	TAGAAGACGCACCGGCCGACGATTCTTCTACTTAAAGTTAATATTCATAGCTTTGAGTAGAAGAATCGTCGGTTTTTTGGCAAGCAAAAGACGGCATACGAGATTGGTGTGTGTTGGTCAGTTTCGCCGTCTTCGT
CDKN1B|NM_004064|197	1559	1027	CDKN1B	NM_004064	197	TAGAAGACGCACCGGGCGCAAGTGGAGTTTCGGTTTGTTAATATTCATAGCAAATCGAAATTCCACTTGCGCTTTTTTGGCAAGCAAAAGACGGCATACGAGATGTGTGTGTGTTGGTCACATTCGCCGTCTTCGT
CDKN1B|NM_004064|198	1560	1027	CDKN1B	NM_004064	198	TAGAAGACGCACCGGGCTTGCCTGAGTTCTACTATAGTTAATATTCATAGCTGTAGTAGAACTCGGGCAAGCTTTTTTGGCAAGCAAAAGACGGCATACGAGATACGTGTGTGTTGGTCAACTTCGCCGTCTTCGT
CDKN1B|NM_004064|199	1561	1027	CDKN1B	NM_004064	199	TAGAAGACGCACCGGGAGCCAACAGAATAGAAGAAAGTTAATATTCATAGCTTTCTTCTGTTCTGTTGGCTCTTTTTTGGCAAGCAAAAGACGGCATACGAGATCAGTGTGTGTTGGTCATGTTCGCCGTCTTCGT
CDKN1B|NM_004064|200	1562	1027	CDKN1B	NM_004064	200	TAGAAGACGCACCGGAGCGTAAGTGGAATTTCGATTGTTAATATTCATAGCAATCGAAATTCCACTTGCGCTTTTTTTGGCAAGCAAAAGACGGCATACGAGATGTGTGTGTGTTGGTACGTTTCGCCGTCTTCGT
CDKN1B|NM_004064|201	1563	1027	CDKN1B	NM_004064	201	TAGAAGACGCACCGGGTCAAACGTGTGAGTGTTTAAGTTAATATTCATAGCTTAGACACTCGCACGTTTGACTTTTTTGGCAAGCAAAAGACGGCATACGAGATCAGTGTGTGTTGGTACCATTCGCCGTCTTCGT
CDKN1B|NM_004064|202	1564	1027	CDKN1B	NM_004064	202	TAGAAGACGCACCGGAGAGCCAACAGAATAGAAGAAGTTAATATTCATAGCTTCTTCTGTTCTGTTGGCTCTTTTTTTGGCAAGCAAAAGACGGCATACGAGATTGGTGTGTGTTGGTACACTTCGCCGTCTTCGT
BET1|NM_005868|203	1565	10282	BET1	NM_005868	203	TAGAAGACGCACCGGGAACTATGGCTATGTTAATAGGTTAATATTCATAGCCTATTAGCATAGCCATAGTTCTTTTTTGGCAAGCAAAAGACGGCATACGAGATACGTGTGTGTTGGTACTGTTCGCCGTCTTCGT
BET1|NM_005868|204	1566	10282	BET1	NM_005868	204	TAGAAGACGCACCGGCAAACAAAGCTGCTGTGTTATGTTAATATTCATAGCATAGCACAGCAGCTTTGTTTGTTTTTTGGCAAGCAAAAGACGGCATACGAGATCAGTGTGTGTTGGTTGGTTTCGCCGTCTTCGT
BET1|NM_005868|205	1567	10282	BET1	NM_005868	205	TAGAAGACGCACCGGGGGAACTATGGCTATGTTAATGTTAATATTCATAGCATTAGCATAGCCATAGTTCCCTTTTTTGGCAAGCAAAAGACGGCATACGAGATACGTGTGTGTTGGTTGCATTCGCCGTCTTCGT
BET1|NM_005868|206	1568	10282	BET1	NM_005868	206	TAGAAGACGCACCGGTGAAAGTCTGAGAAGTAAAGTGTTAATATTCATAGCACTTTGCTTCTCAGACTTTCATTTTTTGGCAAGCAAAAGACGGCATACGAGATGTGTGTGTGTTGGTTGACTTCGCCGTCTTCGT
BET1|NM_005868|207	1569	10282	BET1	NM_005868	207	TAGAAGACGCACCGGAAAGCTGCTGTGTTATATGATGTTAATATTCATAGCATCATATAGCACAGCAGCTTTTTTTTTGGCAAGCAAAAGACGGCATACGAGATTGGTGTGTGTTGGTTGTGTTCGCCGTCTTCGT
BET1|NM_005868|208	1570	10282	BET1	NM_005868	208	TAGAAGACGCACCGGAATGAGAGGCTCATTGAAAGTGTTAATATTCATAGCACTTTCAGTGAGCCTCTCATTTTTTTTGGCAAGCAAAAGACGGCATACGAGATCAGTGTGTGTTGCAGTGTTTCGCCGTCTTCGT
BET1|NM_005868|209	1571	10282	BET1	NM_005868	209	TAGAAGACGCACCGGAACAAAGCTGCTGTGTTATATGTTAATATTCATAGCATATAGCACAGCAGCTTTGTTTTTTTTGGCAAGCAAAAGACGGCATACGAGATACGTGTGTGTTGCAGTCATTCGCCGTCTTCGT
BET1|NM_005868|210	1572	10282	BET1	NM_005868	210	TAGAAGACGCACCGGGGTATAGTGCTTGTGAAGAGGGTTAATATTCATAGCCTTCTTCACAGGCACTATACCTTTTTTGGCAAGCAAAAGACGGCATACGAGATGTGTGTGTGTTGCAGTACTTCGCCGTCTTCGT
SAP18|NM_005870|211	1573	10284	SAP18	NM_005870	211	TAGAAGACGCACCGGGATAGGAGATTACTTGGATATGTTAATATTCATAGCATGTCCAAGTAATCTCCTATCTTTTTTGGCAAGCAAAAGACGGCATACGAGATTGGTGTGTGTTGCAGTTGTTCGCCGTCTTCGT
SAP18|NM_005870|212	1574	10284	SAP18	NM_005870	212	TAGAAGACGCACCGGCAGTCGTAGAAGTTCTAGATAGTTAATATTCATAGCTATCTGGAACTTCTGCGACTGTTTTTTGGCAAGCAAAAGACGGCATACGAGATACGTGTGTGTTGCACAGTTTCGCCGTCTTCGT
SAP18|NM_005870|213	1575	10284	SAP18	NM_005870	213	TAGAAGACGCACCGGCCACCACTGAATGGATGAGTTGTTAATATTCATAGCAACTCGTCCATTCGGTGGTGGTTTTTTGGCAAGCAAAAGACGGCATACGAGATTGGTGTGTGTTGCACACATTCGCCGTCTTCGT
SAP18|NM_005870|214	1576	10284	SAP18	NM_005870	214	TAGAAGACGCACCGGCCTTGAAAGAACTGATAAGCTGTTAATATTCATAGCAGCTTGTCAGTTCTTTCAAGGTTTTTTGGCAAGCAAAAGACGGCATACGAGATCAGTGTGTGTTGCACAACTTCGCCGTCTTCGT
SAP18|NM_005870|215	1577	10284	SAP18	NM_005870	215	TAGAAGACGCACCGGGTTACCTAGGAGGAAATTAAGGTTAATATTCATAGCCTTAATTTCCTCCTGGGTAACTTTTTTGGCAAGCAAAAGACGGCATACGAGATGTGTGTGTGTTGCACATGTTCGCCGTCTTCGT
SAP18|NM_005870|216	1578	10284	SAP18	NM_005870	216	TAGAAGACGCACCGGGAAAGAACTGACAAGTTTAGTGTTAATATTCATAGCACTAAGCTTGTCAGTTCTTTCTTTTTTGGCAAGCAAAAGACGGCATACGAGATTGGTGTGTGTTGCAACGTTTCGCCGTCTTCGT
CDKN2A|NM_000077|217	1579	1029	CDKN2A	NM_000077	217	TAGAAGACGCACCGGGCATGGAGCCTTTGGCTGATTGTTAATATTCATAGCAGTCAGCCGAAGGCTCCATGCTTTTTTGGCAAGCAAAAGACGGCATACGAGATGTGTGTGTGTTGCAACCATTCGCCGTCTTCGT
CDKN2A|NM_000077|218	1580	1029	CDKN2A	NM_000077	218	TAGAAGACGCACCGGGCGACTTTGGAGGATGAAGTTGTTAATATTCATAGCAACTTCGTCCTCCAGAGTCGCTTTTTTGGCAAGCAAAAGACGGCATACGAGATACGTGTGTGTTGCAACACTTCGCCGTCTTCGT
CDKN2A|NM_000077|219	1581	1029	CDKN2A	NM_000077	219	TAGAAGACGCACCGGTGGGAAACTAAGGAAGAGGAGGTTAATATTCATAGCTTCCTCTTCCTTGGTTTCCCATTTTTTGGCAAGCAAAAGACGGCATACGAGATCAGTGTGTGTTGCAACTGTTCGCCGTCTTCGT
CDKN2A|NM_000077|220	1582	1029	CDKN2A	NM_000077	220	TAGAAGACGCACCGGGAATTAGGTAGCGCTTTGATTGTTAATATTCATAGCAATCGAAGCGCTACCTGATTCTTTTTTGGCAAGCAAAAGACGGCATACGAGATGTGTGTGTGTTGCATGGTTTCGCCGTCTTCGT
CDKN2A|NM_000077|221	1583	1029	CDKN2A	NM_000077	221	TAGAAGACGCACCGGAGTAACTATGCCCGTATAGATGTTAATATTCATAGCATCTATGCGGGCATGGTTACTTTTTTTGGCAAGCAAAAGACGGCATACGAGATCAGTGTGTGTTGCATGCATTCGCCGTCTTCGT
CDKN2A|NM_000077|222	1584	1029	CDKN2A	NM_000077	222	TAGAAGACGCACCGGGAAGCTAAGGAAGAGGAATGGGTTAATATTCATAGCTCATTCCTCTTCCTTGGCTTCTTTTTTGGCAAGCAAAAGACGGCATACGAGATTGGTGTGTGTTGCATGACTTCGCCGTCTTCGT
CDKN2C|NM_001262|223	1585	1031	CDKN2C	NM_001262	223	TAGAAGACGCACCGGCTATGGGAGGGATGGGGTTGTGTTAATATTCATAGCACAACCTCATTCCTCCCATAGTTTTTTGGCAAGCAAAAGACGGCATACGAGATACGTGTGTGTTGCATGTGTTCGCCGTCTTCGT
CDKN2C|NM_001262|224	1586	1031	CDKN2C	NM_001262	224	TAGAAGACGCACCGGACTGGTTTCGCTGTCATTTATGTTAATATTCATAGCATGAATGACAGCGAAACCAGTTTTTTTGGCAAGCAAAAGACGGCATACGAGATGTGTGTGTGTTGACGTGTTTCGCCGTCTTCGT
CDKN2C|NM_001262|225	1587	1031	CDKN2C	NM_001262	225	TAGAAGACGCACCGGTGGATTTGGAAGGATTGCGTTGTTAATATTCATAGCAGCGCAGTCCTTCCAAATCCATTTTTTGGCAAGCAAAAGACGGCATACGAGATCAGTGTGTGTTGACGTCATTCGCCGTCTTCGT
CDKN2C|NM_001262|226	1588	1031	CDKN2C	NM_001262	226	TAGAAGACGCACCGGTGGACACTTTACAGACTTTGTGTTAATATTCATAGCGCAAAGTCTGTAAAGTGTCCATTTTTTGGCAAGCAAAAGACGGCATACGAGATTGGTGTGTGTTGACGTACTTCGCCGTCTTCGT
CDKN2C|NM_001262|227	1589	1031	CDKN2C	NM_001262	227	TAGAAGACGCACCGGGATGTTAACATCGAGGATAATGTTAATATTCATAGCATTATCCTCGATGTTAACATCTTTTTTGGCAAGCAAAAGACGGCATACGAGATACGTGTGTGTTGACGTTGTTCGCCGTCTTCGT
CDKN2C|NM_001262|228	1590	1031	CDKN2C	NM_001262	228	TAGAAGACGCACCGGTGCTACTTAGAGGTGTTAATCGTTAATATTCATAGCGATTAGCACCTCTAAGTAGCATTTTTTGGCAAGCAAAAGACGGCATACGAGATCAGTGTGTGTTGACCAGTTTCGCCGTCTTCGT
CDKN2C|NM_001262|229	1591	1031	CDKN2C	NM_001262	229	TAGAAGACGCACCGGTGGGAGGAATGGGGTTGTTGGGTTAATATTCATAGCCTAACAACCTCATTCCTCCCATTTTTTGGCAAGCAAAAGACGGCATACGAGATACGTGTGTGTTGACCACATTCGCCGTCTTCGT
CDKN2C|NM_001262|230	1592	1031	CDKN2C	NM_001262	230	TAGAAGACGCACCGGGTGCTAATCCTGATTTGAAAGGTTAATATTCATAGCCTTTCAAATCGGGATTAGCACTTTTTTGGCAAGCAAAAGACGGCATACGAGATGTGTGTGTGTTGACCAACTTCGCCGTCTTCGT
IKZF1|NM_001220765|231	1593	10320	IKZF1	NM_001220765	231	TAGAAGACGCACCGGGCGGAGGATTTATGAATGTTTGTTAATATTCATAGCAAGCATTCGTAAATCCTCCGCTTTTTTGGCAAGCAAAAGACGGCATACGAGATTGGTGTGTGTTGACCATGTTCGCCGTCTTCGT
IKZF1|NM_001220765|232	1594	10320	IKZF1	NM_001220765	232	TAGAAGACGCACCGGCCGTTGGTAAACCTCATAAATGTTAATATTCATAGCATTTGTGAGGTTTACCAACGGTTTTTTGGCAAGCAAAAGACGGCATACGAGATACGTGTGTGTTGACACGTTTCGCCGTCTTCGT
IKZF1|NM_001220765|233	1595	10320	IKZF1	NM_001220765	233	TAGAAGACGCACCGGGCCGAAGTTATAAACAGTGAAGTTAATATTCATAGCTTCGCTGTTTATAGCTTCGGCTTTTTTGGCAAGCAAAAGACGGCATACGAGATTGGTGTGTGTTGACACCATTCGCCGTCTTCGT
IKZF1|NM_001220765|234	1596	10320	IKZF1	NM_001220765	234	TAGAAGACGCACCGGCGCCAAATGTAAGAGCTTTATGTTAATATTCATAGCATAGAGCTCTTACGTTTGGCGTTTTTTGGCAAGCAAAAGACGGCATACGAGATCAGTGTGTGTTGACACACTTCGCCGTCTTCGT
IKZF1|NM_001220765|235	1597	10320	IKZF1	NM_001220765	235	TAGAAGACGCACCGGTATTGTGGCCGAAGTTATAAAGTTAATATTCATAGCTTTATAGCTTCGGCCACAATATTTTTTGGCAAGCAAAAGACGGCATACGAGATGTGTGTGTGTTGACACTGTTCGCCGTCTTCGT
IKZF1|NM_001220765|236	1598	10320	IKZF1	NM_001220765	236	TAGAAGACGCACCGGCTACGAGAAGGAGAATGAAATGTTAATATTCATAGCATTTCGTTCTCCTTCTCGTAGTTTTTTGGCAAGCAAAAGACGGCATACGAGATTGGTGTGTGTTGACTGGTTTCGCCGTCTTCGT
IKZF1|NM_001220765|237	1599	10320	IKZF1	NM_001220765	237	TAGAAGACGCACCGGGTGATATCTGTGGGATTATTTGTTAATATTCATAGCAAATGATCCCACAGATATCACTTTTTTGGCAAGCAAAAGACGGCATACGAGATGTGTGTGTGTTGACTGCATTCGCCGTCTTCGT
IKZF1|NM_001220765|238	1600	10320	IKZF1	NM_001220765	238	TAGAAGACGCACCGGCCGCTTCCATATGAGTTAAAGGTTAATATTCATAGCCTTTAGCTCATGTGGAAGCGGTTTTTTGGCAAGCAAAAGACGGCATACGAGATACGTGTGTGTTGACTGACTTCGCCGTCTTCGT
AKR1A1|NM_001202414|239	1601	10327	AKR1A1	NM_001202414	239	TAGAAGACGCACCGGGCAGCTAAATGCTCTGAATAAGTTAATATTCATAGCTTGTTCAGGGCATTTAGCTGCTTTTTTGGCAAGCAAAAGACGGCATACGAGATCAGTGTGTGTTGACTGTGTTCGCCGTCTTCGT
AKR1A1|NM_001202414|240	1602	10327	AKR1A1	NM_001202414	240	TAGAAGACGCACCGGGCCATATTGATTGTGCTGTTAGTTAATATTCATAGCTAGCAGCACAATCAATGTGGCTTTTTTGGCAAGCAAAAGACGGCATACGAGATTGGTGTGTGTTGTGGTGTTTCGCCGTCTTCGT
AKR1A1|NM_001202414|241	1603	10327	AKR1A1	NM_001202414	241	TAGAAGACGCACCGGGCAGTTGTTAAGTATGCCTTTGTTAATATTCATAGCAAGGGCATACTTAACAGCTGCTTTTTTGGCAAGCAAAAGACGGCATACGAGATGTGTGTGTGTTGTGGTCATTCGCCGTCTTCGT
AKR1A1|NM_001202414|242	1604	10327	AKR1A1	NM_001202414	242	TAGAAGACGCACCGGCCTTCAGAACATTAAGGTGTTGTTAATATTCATAGCAACACCTTGATGTTCTGAAGGTTTTTTGGCAAGCAAAAGACGGCATACGAGATACGTGTGTGTTGTGGTACTTCGCCGTCTTCGT
AKR1A1|NM_001202414|243	1605	10327	AKR1A1	NM_001202414	243	TAGAAGACGCACCGGGCAGGTGGAATGTCACCTATAGTTAATATTCATAGCTATGGGTGGCATTCCACCTGCTTTTTTGGCAAGCAAAAGACGGCATACGAGATCAGTGTGTGTTGTGGTTGTTCGCCGTCTTCGT
AKR1A1|NM_001202414|244	1606	10327	AKR1A1	NM_001202414	244	TAGAAGACGCACCGGAGGCTATCGCCATATTGATTGGTTAATATTCATAGCCAATCAATGTGGCGGTAGCCTTTTTTTGGCAAGCAAAAGACGGCATACGAGATGTGTGTGTGTTGTGCAGTTTCGCCGTCTTCGT
AKR1A1|NM_001202414|245	1607	10327	AKR1A1	NM_001202414	245	TAGAAGACGCACCGGACGGTAATGAGCTTGAGATTGGTTAATATTCATAGCCAATCTCAGGCTCATTGCCGTTTTTTTGGCAAGCAAAAGACGGCATACGAGATCAGTGTGTGTTGTGCACATTCGCCGTCTTCGT
AKR1A1|NM_001202414|246	1608	10327	AKR1A1	NM_001202414	246	TAGAAGACGCACCGGGAATGCTGATGGGATTATATGGTTAATATTCATAGCCATATAGTCCCATCAGCATTCTTTTTTGGCAAGCAAAAGACGGCATACGAGATTGGTGTGTGTTGTGCAACTTCGCCGTCTTCGT
ABCA9|NM_080283|247	1609	10350	ABCA9	NM_080283	247	TAGAAGACGCACCGGCGGAAGGAATATGTAGGTAAAGTTAATATTCATAGCTTTGCCTGCATATTCCTTCCGTTTTTTGGCAAGCAAAAGACGGCATACGAGATACGTGTGTGTTGTGCATGTTCGCCGTCTTCGT
ABCA9|NM_080283|248	1610	10350	ABCA9	NM_080283	248	TAGAAGACGCACCGGGCTCATTGTCAAGTAGTGAATGTTAATATTCATAGCATTCACTGCTTGACAGTGAGCTTTTTTGGCAAGCAAAAGACGGCATACGAGATCAGTGTGTGTTGTGACGTTTCGCCGTCTTCGT
ABCA9|NM_080283|249	1611	10350	ABCA9	NM_080283	249	TAGAAGACGCACCGGCCTCCTGCTAATGTAAATAATGTTAATATTCATAGCATTATTTGCATTAGCAGGAGGTTTTTTGGCAAGCAAAAGACGGCATACGAGATACGTGTGTGTTGTGACCATTCGCCGTCTTCGT
ABCA9|NM_080283|250	1612	10350	ABCA9	NM_080283	250	TAGAAGACGCACCGGGATGCCTTTGGAATTAGAAATGTTAATATTCATAGCATTTCTAGTTCCAAAGGCATCTTTTTTGGCAAGCAAAAGACGGCATACGAGATGTGTGTGTGTTGTGACACTTCGCCGTCTTCGT
ABCA9|NM_080283|251	1613	10350	ABCA9	NM_080283	251	TAGAAGACGCACCGGGATCCTCCTGCTAATGTAAATGTTAATATTCATAGCATTTGCATTAGCAGGAGGATCTTTTTTGGCAAGCAAAAGACGGCATACGAGATTGGTGTGTGTTGTGACTGTTCGCCGTCTTCGT
ABCA9|NM_080283|252	1614	10350	ABCA9	NM_080283	252	TAGAAGACGCACCGGACAGATGACCCATCTTATAATGTTAATATTCATAGCATTGTAAGATGGGTCATCTGTTTTTTTGGCAAGCAAAAGACGGCATACGAGATACGTGTGTGTTGTGTGGTTTCGCCGTCTTCGT
ABCA9|NM_080283|253	1615	10350	ABCA9	NM_080283	253	TAGAAGACGCACCGGAAAGGATCCTGTGTTTAGAATGTTAATATTCATAGCATTCTGAACACAGGATCCTTTTTTTTTGGCAAGCAAAAGACGGCATACGAGATTGGTGTGTGTTGTGTGCATTCGCCGTCTTCGT
ABCA9|NM_080283|254	1616	10350	ABCA9	NM_080283	254	TAGAAGACGCACCGGATAGGACTGTTAGGACATAATGTTAATATTCATAGCATTGTGTCCTAACAGTCCTATTTTTTTGGCAAGCAAAAGACGGCATACGAGATCAGTGTGTGTTGTGTGACTTCGCCGTCTTCGT
WARS2|NM_015836|255	1617	10352	WARS2	NM_015836	255	TAGAAGACGCACCGGGTGAGGTTATAGGATGAATATGTTAATATTCATAGCATATTCATCCTGTAACCTCACTTTTTTGGCAAGCAAAAGACGGCATACGAGATGTGTGTGTGTTGTGTGTGTTCGCCGTCTTCGT
WARS2|NM_015836|256	1618	10352	WARS2	NM_015836	256	TAGAAGACGCACCGGCAGAGGAGATAGTGTAGAAATGTTAATATTCATAGCATTTCTGCACTATCTCCTCTGTTTTTTGGCAAGCAAAAGACGGCATACGAGATCAGTGTGTCAGTGTGTGTTTCGCCGTCTTCGT
WARS2|NM_015836|257	1619	10352	WARS2	NM_015836	257	TAGAAGACGCACCGGGACAGCAAGAAGTGAGTATTTGTTAATATTCATAGCAAATACTCGCTTCTTGCTGTCTTTTTTGGCAAGCAAAAGACGGCATACGAGATACGTGTGTCAGTGTGTCATTCGCCGTCTTCGT
WARS2|NM_015836|258	1620	10352	WARS2	NM_015836	258	TAGAAGACGCACCGGGCAGATGTTGTGATTGAGAGGGTTAATATTCATAGCCTTCTCAATCACAGCATCTGCTTTTTTGGCAAGCAAAAGACGGCATACGAGATGTGTGTGTCAGTGTGTACTTCGCCGTCTTCGT
WARS2|NM_015836|259	1621	10352	WARS2	NM_015836	259	TAGAAGACGCACCGGTGTGCTAGGAGGTGAAGAAGTGTTAATATTCATAGCATTTCTTCACCTCCTGGCACATTTTTTGGCAAGCAAAAGACGGCATACGAGATTGGTGTGTCAGTGTGTTGTTCGCCGTCTTCGT
WARS2|NM_015836|260	1622	10352	WARS2	NM_015836	260	TAGAAGACGCACCGGGCCGATATTCTGTTGTATAAGGTTAATATTCATAGCCTTGTACAACAGAATGTCGGCTTTTTTGGCAAGCAAAAGACGGCATACGAGATACGTGTGTCAGTGTCAGTTTCGCCGTCTTCGT
WARS2|NM_015836|261	1623	10352	WARS2	NM_015836	261	TAGAAGACGCACCGGACAGCATTGTTGATCTCCATTGTTAATATTCATAGCAGTGGAGGTCAACAATGCTGTTTTTTTGGCAAGCAAAAGACGGCATACGAGATTGGTGTGTCAGTGTCACATTCGCCGTCTTCGT
WARS2|NM_015836|262	1624	10352	WARS2	NM_015836	262	TAGAAGACGCACCGGTGTTCTTGCCTGTGGTATAAAGTTAATATTCATAGCTTTATGCCACAGGCAAGAAGATTTTTTGGCAAGCAAAAGACGGCATACGAGATCAGTGTGTCAGTGTCAACTTCGCCGTCTTCGT
SEMA3A|NM_006080|263	1625	10371	SEMA3A	NM_006080	263	TAGAAGACGCACCGGGGAACATGGGTTCATATAAACGTTAATATTCATAGCGTTTGTATGAACCCATGTTCCTTTTTTGGCAAGCAAAAGACGGCATACGAGATGTGTGTGTCAGTGTCATGTTCGCCGTCTTCGT
SEMA3A|NM_006080|264	1626	10371	SEMA3A	NM_006080	264	TAGAAGACGCACCGGCTCATCTCAGAGAGTGATAATGTTAATATTCATAGCATTGTCACTCTCTGAGATGAGTTTTTTGGCAAGCAAAAGACGGCATACGAGATTGGTGTGTCAGTGTACGTTTCGCCGTCTTCGT
SEMA3A|NM_006080|265	1627	10371	SEMA3A	NM_006080	265	TAGAAGACGCACCGGACAATGTGCCAAGGTTGAAATGTTAATATTCATAGCATTTCAGCCTTGGCACATTGTTTTTTTGGCAAGCAAAAGACGGCATACGAGATGTGTGTGTCAGTGTACCATTCGCCGTCTTCGT
SEMA3A|NM_006080|266	1628	10371	SEMA3A	NM_006080	266	TAGAAGACGCACCGGGTTTACGACTTCCAGTAATATGTTAATATTCATAGCATGTTACTGGAAGTCGTAAACTTTTTTGGCAAGCAAAAGACGGCATACGAGATACGTGTGTCAGTGTACACTTCGCCGTCTTCGT
SEMA3A|NM_006080|267	1629	10371	SEMA3A	NM_006080	267	TAGAAGACGCACCGGGGATGAGTTCTGTGAATAAGTGTTAATATTCATAGCACTTGTTCACAGAACTCATCCTTTTTTGGCAAGCAAAAGACGGCATACGAGATCAGTGTGTCAGTGTACTGTTCGCCGTCTTCGT
SEMA3A|NM_006080|268	1630	10371	SEMA3A	NM_006080	268	TAGAAGACGCACCGGGGGATGGACCTAACTATTAATGTTAATATTCATAGCATTGATAGTTGGGTCCATCCCTTTTTTGGCAAGCAAAAGACGGCATACGAGATGTGTGTGTCAGTGTTGGTTTCGCCGTCTTCGT
SEMA3A|NM_006080|269	1631	10371	SEMA3A	NM_006080	269	TAGAAGACGCACCGGACTGCAGGATGTATTCTTAATGTTAATATTCATAGCATTAGGAATACATCCTGCAGTTTTTTTGGCAAGCAAAAGACGGCATACGAGATCAGTGTGTCAGTGTTGCATTCGCCGTCTTCGT
SEMA3A|NM_006080|270	1632	10371	SEMA3A	NM_006080	270	TAGAAGACGCACCGGGGAGAATTATACTCTGGAATTGTTAATATTCATAGCAGTTCCAGAGTATAATTCTCCTTTTTTGGCAAGCAAAAGACGGCATACGAGATTGGTGTGTCAGTGTTGACTTCGCCGTCTTCGT
ATP8A1|NM_001105529|271	1633	10396	ATP8A1	NM_001105529	271	TAGAAGACGCACCGGGCCTCCTTTAATTCTTGGAATGTTAATATTCATAGCATTCCAAGAGTTAAAGGAGGCTTTTTTGGCAAGCAAAAGACGGCATACGAGATACGTGTGTCAGTGTTGTGTTCGCCGTCTTCGT
ATP8A1|NM_001105529|272	1634	10396	ATP8A1	NM_001105529	272	TAGAAGACGCACCGGGATGTTCTCTGGAAAGAGAATGTTAATATTCATAGCATTCTCTTTCCGGAGAGCATCTTTTTTGGCAAGCAAAAGACGGCATACGAGATGTGTGTGTCAGTCAGTGTTTCGCCGTCTTCGT
ATP8A1|NM_001105529|273	1635	10396	ATP8A1	NM_001105529	273	TAGAAGACGCACCGGGCAATTGGTGATGGAGTAAATGTTAATATTCATAGCATTTGCTCCATCACCGATTGCTTTTTTGGCAAGCAAAAGACGGCATACGAGATCAGTGTGTCAGTCAGTCATTCGCCGTCTTCGT
ATP8A1|NM_001105529|274	1636	10396	ATP8A1	NM_001105529	274	TAGAAGACGCACCGGGCTATGGCTCGAACATTTAATGTTAATATTCATAGCATTAGATGTTCGAGCCATAGCTTTTTTGGCAAGCAAAAGACGGCATACGAGATTGGTGTGTCAGTCAGTACTTCGCCGTCTTCGT
ATP8A1|NM_001105529|275	1637	10396	ATP8A1	NM_001105529	275	TAGAAGACGCACCGGGGCAGGAAGAAAGGTATGGATGTTAATATTCATAGCATTCATATCTTTCTTCCTGCCTTTTTTGGCAAGCAAAAGACGGCATACGAGATACGTGTGTCAGTCAGTTGTTCGCCGTCTTCGT
ATP8A1|NM_001105529|276	1638	10396	ATP8A1	NM_001105529	276	TAGAAGACGCACCGGGAGATAGTGAAAGTGATCAATGTTAATATTCATAGCATTGGTCACTTTCACTATCTCTTTTTTGGCAAGCAAAAGACGGCATACGAGATCAGTGTGTCAGTCACAGTTTCGCCGTCTTCGT
ATP8A1|NM_001105529|277	1639	10396	ATP8A1	NM_001105529	277	TAGAAGACGCACCGGATGGTTGCTCTCTTGATGAATGTTAATATTCATAGCATTCATCAGGAGAGCAGCCATTTTTTTGGCAAGCAAAAGACGGCATACGAGATACGTGTGTCAGTCACACATTCGCCGTCTTCGT
ATP8A1|NM_001105529|278	1640	10396	ATP8A1	NM_001105529	278	TAGAAGACGCACCGGCCACCACTTAAGCTCTTAAATGTTAATATTCATAGCATTTGAGAGCTTAAGTGGTGGTTTTTTGGCAAGCAAAAGACGGCATACGAGATGTGTGTGTCAGTCACAACTTCGCCGTCTTCGT
GNB2L1|NM_006098|279	1641	10399	GNB2L1	NM_006098	279	TAGAAGACGCACCGGGATCTGGGATTTGGAGGGGAAGTTAATATTCATAGCTTTCCCTCTAAATCCCAGATCTTTTTTGGCAAGCAAAAGACGGCATACGAGATTGGTGTGTCAGTCACATGTTCGCCGTCTTCGT
GNB2L1|NM_006098|280	1642	10399	GNB2L1	NM_006098	280	TAGAAGACGCACCGGAGGATGGTCAGGCTATGTTATGTTAATATTCATAGCATAACATGGCCTGGCCATCCTTTTTTTGGCAAGCAAAAGACGGCATACGAGATACGTGTGTCAGTCAACGTTTCGCCGTCTTCGT
GNB2L1|NM_006098|281	1643	10399	GNB2L1	NM_006098	281	TAGAAGACGCACCGGCCAGGGATGAGATCAATTATGGTTAATATTCATAGCCATAGTTGGTCTCATCCCTGGTTTTTTGGCAAGCAAAAGACGGCATACGAGATTGGTGTGTCAGTCAACCATTCGCCGTCTTCGT
GNB2L1|NM_006098|282	1644	10399	GNB2L1	NM_006098	282	TAGAAGACGCACCGGATACCTTGGGTGTGTGTAAATGTTAATATTCATAGCATTTGCACACACCCAGGGTATTTTTTTGGCAAGCAAAAGACGGCATACGAGATCAGTGTGTCAGTCAACACTTCGCCGTCTTCGT
GNB2L1|NM_006098|283	1645	10399	GNB2L1	NM_006098	283	TAGAAGACGCACCGGGATGAACTGAAGTAAGAAGTTGTTAATATTCATAGCAACTTCTTGCTTCAGTTCATCTTTTTTGGCAAGCAAAAGACGGCATACGAGATGTGTGTGTCAGTCAACTGTTCGCCGTCTTCGT
GNB2L1|NM_006098|284	1646	10399	GNB2L1	NM_006098	284	TAGAAGACGCACCGGGTCTCTGGATCTTGAGATAAAGTTAATATTCATAGCTTTATCTCGAGATCCAGAGACTTTTTTGGCAAGCAAAAGACGGCATACGAGATTGGTGTGTCAGTCATGGTTTCGCCGTCTTCGT
GNB2L1|NM_006098|285	1647	10399	GNB2L1	NM_006098	285	TAGAAGACGCACCGGGCCATGTTATGGGATCTTAATGTTAATATTCATAGCGTTGAGATCCCATAACATGGCTTTTTTGGCAAGCAAAAGACGGCATACGAGATGTGTGTGTCAGTCATGCATTCGCCGTCTTCGT
PIAS3|NM_006099|286	1648	10401	PIAS3	NM_006099	286	TAGAAGACGCACCGGCCGACATCTAAGGTTTAGATTGTTAATATTCATAGCAATCTAAACCTTGGATGTCGGTTTTTTGGCAAGCAAAAGACGGCATACGAGATACGTGTGTCAGTCATGACTTCGCCGTCTTCGT
PIAS3|NM_006099|287	1649	10401	PIAS3	NM_006099	287	TAGAAGACGCACCGGCCCTATGAATCTCTTATCATTGTTAATATTCATAGCAATGATAAGAGATTCATAGGGTTTTTTGGCAAGCAAAAGACGGCATACGAGATCAGTGTGTCAGTCATGTGTTCGCCGTCTTCGT
PIAS3|NM_006099|288	1650	10401	PIAS3	NM_006099	288	TAGAAGACGCACCGGGCTGTCGGTTAGACATTATTTGTTAATATTCATAGCAAATGATGTCTGACCGACAGCTTTTTTGGCAAGCAAAAGACGGCATACGAGATTGGTGTGTCAGTACGTGTTTCGCCGTCTTCGT
PIAS3|NM_006099|289	1651	10401	PIAS3	NM_006099	289	TAGAAGACGCACCGGATCTGAGTTCGGATGGAATTAGTTAATATTCATAGCTAATTCCGTCCGAACTCAGATTTTTTTGGCAAGCAAAAGACGGCATACGAGATGTGTGTGTCAGTACGTCATTCGCCGTCTTCGT
PIAS3|NM_006099|290	1652	10401	PIAS3	NM_006099	290	TAGAAGACGCACCGGGAAGTAAAGGAGTCCTGATATGTTAATATTCATAGCATGTCAGGACTCCTTTGCTTCTTTTTTGGCAAGCAAAAGACGGCATACGAGATACGTGTGTCAGTACGTACTTCGCCGTCTTCGT
PIAS3|NM_006099|291	1653	10401	PIAS3	NM_006099	291	TAGAAGACGCACCGGGATCCATTAGAGAATAAGAAGGTTAATATTCATAGCCTTCTTATTCTCTGATGGATCTTTTTTGGCAAGCAAAAGACGGCATACGAGATCAGTGTGTCAGTACGTTGTTCGCCGTCTTCGT
PIAS3|NM_006099|292	1654	10401	PIAS3	NM_006099	292	TAGAAGACGCACCGGTCATTTGAGTTCGGATGGAATGTTAATATTCATAGCATTCCGTCCGAACTCAGATGATTTTTTGGCAAGCAAAAGACGGCATACGAGATGTGTGTGTCAGTACCAGTTTCGCCGTCTTCGT
PIAS3|NM_006099|293	1655	10401	PIAS3	NM_006099	293	TAGAAGACGCACCGGGTGTCCAGATGAAGATTAAAGGTTAATATTCATAGCCTTTGATCTTCATCTGGACACTTTTTTGGCAAGCAAAAGACGGCATACGAGATCAGTGTGTCAGTACCACATTCGCCGTCTTCGT
ARIH2|NM_006321|294	1656	10425	ARIH2	NM_006321	294	TAGAAGACGCACCGGCCTGCAATACATCTACCTATAGTTAATATTCATAGCTATGGGTAGGTGTATTGCAGGTTTTTTGGCAAGCAAAAGACGGCATACGAGATTGGTGTGTCAGTACCAACTTCGCCGTCTTCGT
ARIH2|NM_006321|295	1657	10425	ARIH2	NM_006321	295	TAGAAGACGCACCGGCGACTCTGAAATAGCCAATTAGTTAATATTCATAGCTAGTTGGCTGTTTCAGAGTCGTTTTTTGGCAAGCAAAAGACGGCATACGAGATACGTGTGTCAGTACCATGTTCGCCGTCTTCGT
ARIH2|NM_006321|296	1658	10425	ARIH2	NM_006321	296	TAGAAGACGCACCGGGCTGGATGTGTTTAGGAGGTTGTTAATATTCATAGCAATCTCCTAGACACATCCAGCTTTTTTGGCAAGCAAAAGACGGCATACGAGATCAGTGTGTCAGTACACGTTTCGCCGTCTTCGT
ARIH2|NM_006321|297	1659	10425	ARIH2	NM_006321	297	TAGAAGACGCACCGGGAGGATTATTATGTGGGAGTAGTTAATATTCATAGCTACTCCCACGTAATAGTCCTCTTTTTTGGCAAGCAAAAGACGGCATACGAGATACGTGTGTCAGTACACCATTCGCCGTCTTCGT
ARIH2|NM_006321|298	1660	10425	ARIH2	NM_006321	298	TAGAAGACGCACCGGCTGTGCTACAATCTGGAAATGGTTAATATTCATAGCCATTTCCGGATTGTGGCACAGTTTTTTGGCAAGCAAAAGACGGCATACGAGATGTGTGTGTCAGTACACACTTCGCCGTCTTCGT
ARIH2|NM_006321|299	1661	10425	ARIH2	NM_006321	299	TAGAAGACGCACCGGAGCCCTCAAGAAGTATTTATTGTTAATATTCATAGCAATAAGTACTTCTTGAGGGCTTTTTTTGGCAAGCAAAAGACGGCATACGAGATTGGTGTGTCAGTACACTGTTCGCCGTCTTCGT
ARIH2|NM_006321|300	1662	10425	ARIH2	NM_006321	300	TAGAAGACGCACCGGGAAGAGGACTATGACCTAAATGTTAATATTCATAGCATTTGGGTCATAGTCCTCTTCTTTTTTGGCAAGCAAAAGACGGCATACGAGATACGTGTGTCAGTACTGGTTTCGCCGTCTTCGT
ARIH2|NM_006321|301	1663	10425	ARIH2	NM_006321	301	TAGAAGACGCACCGGCAGGAGAGGGTTATGAATAATGTTAATATTCATAGCATTGTTCATGACCCTCTCCTGTTTTTTGGCAAGCAAAAGACGGCATACGAGATTGGTGTGTCAGTACTGCATTCGCCGTCTTCGT
CDX2|NM_001265|302	1664	1045	CDX2	NM_001265	302	TAGAAGACGCACCGGGTTTCAGAACTGCAGAGTAAAGTTAATATTCATAGCTTTGCTCTGCGGTTCTGAAACTTTTTTGGCAAGCAAAAGACGGCATACGAGATCAGTGTGTCAGTACTGACTTCGCCGTCTTCGT
CDX2|NM_001265|303	1665	1045	CDX2	NM_001265	303	TAGAAGACGCACCGGAAACCAGGACGAAAGATAAATGTTAATATTCATAGCATTTGTCTTTCGTCCTGGTTTTTTTTTGGCAAGCAAAAGACGGCATACGAGATGTGTGTGTCAGTACTGTGTTCGCCGTCTTCGT
CDX2|NM_001265|304	1666	1045	CDX2	NM_001265	304	TAGAAGACGCACCGGGAAGAAGTTGCAGTAGCAATAGTTAATATTCATAGCTGTTGCTGCTGCAACTTCTTCTTTTTTGGCAAGCAAAAGACGGCATACGAGATACGTGTGTCAGTTGGTGTTTCGCCGTCTTCGT
CDX2|NM_001265|305	1667	1045	CDX2	NM_001265	305	TAGAAGACGCACCGGCTCTTTGAGAGGTAGGTTAAAGTTAATATTCATAGCTTTAACCTGCCTCTCAGAGAGTTTTTTGGCAAGCAAAAGACGGCATACGAGATTGGTGTGTCAGTTGGTCATTCGCCGTCTTCGT
CDX2|NM_001265|306	1668	1045	CDX2	NM_001265	306	TAGAAGACGCACCGGGAGAAGGAGTTTCACTATAGTGTTAATATTCATAGCACTGTAGTGAAACTCCTTCTCTTTTTTGGCAAGCAAAAGACGGCATACGAGATCAGTGTGTCAGTTGGTACTTCGCCGTCTTCGT
CDX2|NM_001265|307	1669	1045	CDX2	NM_001265	307	TAGAAGACGCACCGGTTTCAGAACTGCAGAGTAAAGGTTAATATTCATAGCCTTTGCTCTGCGGTTCTGAAATTTTTTGGCAAGCAAAAGACGGCATACGAGATGTGTGTGTCAGTTGGTTGTTCGCCGTCTTCGT
CDX2|NM_001265|308	1670	1045	CDX2	NM_001265	308	TAGAAGACGCACCGGAGAAGAAGTTGTAGCAGTAACGTTAATATTCATAGCGTTGCTGCTGCAACTTCTTCTTTTTTTGGCAAGCAAAAGACGGCATACGAGATTGGTGTGTCAGTTGCAGTTTCGCCGTCTTCGT
CDX2|NM_001265|309	1671	1045	CDX2	NM_001265	309	TAGAAGACGCACCGGCCGCAGAGTAAAGGAGAGGAGGTTAATATTCATAGCTTCCTCTCCTTTGCTCTGCGGTTTTTTGGCAAGCAAAAGACGGCATACGAGATGTGTGTGTCAGTTGCACATTCGCCGTCTTCGT
TAB1|NM_006116|310	1672	10454	TAB1	NM_006116	310	TAGAAGACGCACCGGCGCTGCCAAGTTCAAACTAATGTTAATATTCATAGCATTGGTTTGGACTTGGCAGCGTTTTTTGGCAAGCAAAAGACGGCATACGAGATACGTGTGTCAGTTGCAACTTCGCCGTCTTCGT
TAB1|NM_006116|311	1673	10454	TAB1	NM_006116	311	TAGAAGACGCACCGGGCCTCCTTAGTATTAGAAGATGTTAATATTCATAGCATCTTCTGATACTGAGGAGGCTTTTTTGGCAAGCAAAAGACGGCATACGAGATCAGTGTGTCAGTTGCATGTTCGCCGTCTTCGT
TAB1|NM_006116|312	1674	10454	TAB1	NM_006116	312	TAGAAGACGCACCGGGCGATGATTGACATTGAGTTTGTTAATATTCATAGCAAACTCAGTGTCAATCATCGCTTTTTTGGCAAGCAAAAGACGGCATACGAGATGTGTGTGTCAGTTGACGTTTCGCCGTCTTCGT
TAB1|NM_006116|313	1675	10454	TAB1	NM_006116	313	TAGAAGACGCACCGGGTCGCCAATGTTGGTACAAATGTTAATATTCATAGCGTTTGTACCGACATTGGCGACTTTTTTGGCAAGCAAAAGACGGCATACGAGATCAGTGTGTCAGTTGACCATTCGCCGTCTTCGT
TAB1|NM_006116|314	1676	10454	TAB1	NM_006116	314	TAGAAGACGCACCGGAATCATCGCAGAGCTAGAAATGTTAATATTCATAGCATTTCTGGCTCTGCGATGATTTTTTTTGGCAAGCAAAAGACGGCATACGAGATTGGTGTGTCAGTTGACACTTCGCCGTCTTCGT
TAB1|NM_006116|315	1677	10454	TAB1	NM_006116	315	TAGAAGACGCACCGGAGTTCAGGAGTGAGAATAACTGTTAATATTCATAGCAGTTGTTCTCACTCCTGAACTTTTTTTGGCAAGCAAAAGACGGCATACGAGATACGTGTGTCAGTTGACTGTTCGCCGTCTTCGT
TAB1|NM_006116|316	1678	10454	TAB1	NM_006116	316	TAGAAGACGCACCGGATCCCTCAGTGCTAACTAAATGTTAATATTCATAGCGTTTAGTTGGCACTGAGGGATTTTTTTGGCAAGCAAAAGACGGCATACGAGATCAGTGTGTCAGTTGTGGTTTCGCCGTCTTCGT
TAB1|NM_006116|317	1679	10454	TAB1	NM_006116	317	TAGAAGACGCACCGGCAAGATGTTAGAGAGGGAAATGTTAATATTCATAGCATTTCCCTCTCTAACGTCTTGTTTTTTGGCAAGCAAAAGACGGCATACGAGATACGTGTGTCAGTTGTGCATTCGCCGTCTTCGT
CDX4|NM_005193|318	1680	1046	CDX4	NM_005193	318	TAGAAGACGCACCGGACCGGCTTTCTTGCATTATATGTTAATATTCATAGCATATAGTGCGAGAAAGCCGGTTTTTTTGGCAAGCAAAAGACGGCATACGAGATGTGTGTGTCAGTTGTGACTTCGCCGTCTTCGT
CDX4|NM_005193|319	1681	1046	CDX4	NM_005193	319	TAGAAGACGCACCGGCTTTCTGAGAGATAGGTGAAAGTTAATATTCATAGCTTTCACCTGTCTCTCGGAAAGTTTTTTGGCAAGCAAAAGACGGCATACGAGATTGGTGTGTCAGTTGTGTGTTCGCCGTCTTCGT
CDX4|NM_005193|320	1682	1046	CDX4	NM_005193	320	TAGAAGACGCACCGGAGCAGGTTATAGTCTCTGAATGTTAATATTCATAGCATTCGGAGACTATAACCTGCTTTTTTTGGCAAGCAAAAGACGGCATACGAGATGTGTGTGTCACAGTGTGTTTCGCCGTCTTCGT
CDX4|NM_005193|321	1683	1046	CDX4	NM_005193	321	TAGAAGACGCACCGGCAGAGCTAAGGAGAGAAAGGTGTTAATATTCATAGCATCTTTCTCTCCTTGGCTCTGTTTTTTGGCAAGCAAAAGACGGCATACGAGATCAGTGTGTCACAGTGTCATTCGCCGTCTTCGT
CDX4|NM_005193|322	1684	1046	CDX4	NM_005193	322	TAGAAGACGCACCGGAAATCAGAGCTGGTAGTTAACGTTAATATTCATAGCGTTAACTGCCAGCTCTGATTTTTTTTTGGCAAGCAAAAGACGGCATACGAGATTGGTGTGTCACAGTGTACTTCGCCGTCTTCGT
CDX4|NM_005193|323	1685	1046	CDX4	NM_005193	323	TAGAAGACGCACCGGAGCCAAGGAGAGAAGGATGGTGTTAATATTCATAGCATCATCTTTCTCTCCTTGGCTTTTTTTGGCAAGCAAAAGACGGCATACGAGATACGTGTGTCACAGTGTTGTTCGCCGTCTTCGT
CDX4|NM_005193|324	1686	1046	CDX4	NM_005193	324	TAGAAGACGCACCGGTGAGATACAGTAGGTTATAGTGTTAATATTCATAGCACTATAACCTGCTGTATCTCATTTTTTGGCAAGCAAAAGACGGCATACGAGATCAGTGTGTCACAGTCAGTTTCGCCGTCTTCGT
CDX4|NM_005193|325	1687	1046	CDX4	NM_005193	325	TAGAAGACGCACCGGAGAGCTAAGGAGAGAAAGGTGGTTAATATTCATAGCCATCTTTCTCTCCTTGGCTCTTTTTTTGGCAAGCAAAAGACGGCATACGAGATACGTGTGTCACAGTCACATTCGCCGTCTTCGT
TACC3|NM_006342|326	1688	10460	TACC3	NM_006342	326	TAGAAGACGCACCGGGCTTGTGGAGTTTGATTTCTTGTTAATATTCATAGCAAGAAATCGAACTCCACAAGCTTTTTTGGCAAGCAAAAGACGGCATACGAGATGTGTGTGTCACAGTCAACTTCGCCGTCTTCGT
TACC3|NM_006342|327	1689	10460	TACC3	NM_006342	327	TAGAAGACGCACCGGTGAAATCCAGAAAGTTCTAAAGTTAATATTCATAGCTTTAGAACTTTCTGGATTTCATTTTTTGGCAAGCAAAAGACGGCATACGAGATTGGTGTGTCACAGTCATGTTCGCCGTCTTCGT
TACC3|NM_006342|328	1690	10460	TACC3	NM_006342	328	TAGAAGACGCACCGGAGCAGCATGTACGGTGTAAATGTTAATATTCATAGCATTTGCACCGTGCATGCTGCTTTTTTTGGCAAGCAAAAGACGGCATACGAGATACGTGTGTCACAGTACGTTTCGCCGTCTTCGT
TACC3|NM_006342|329	1691	10460	TACC3	NM_006342	329	TAGAAGACGCACCGGTTGAGGAAGCAGTCTTTATACGTTAATATTCATAGCGTATAAGGACTGCTTCCTCAATTTTTTGGCAAGCAAAAGACGGCATACGAGATTGGTGTGTCACAGTACCATTCGCCGTCTTCGT
TACC3|NM_006342|330	1692	10460	TACC3	NM_006342	330	TAGAAGACGCACCGGAGAAGTGGTTGCAGGCTAAATGTTAATATTCATAGCATTTGGCCTGCAGCCACTTCTTTTTTTGGCAAGCAAAAGACGGCATACGAGATCAGTGTGTCACAGTACACTTCGCCGTCTTCGT
TACC3|NM_006342|331	1693	10460	TACC3	NM_006342	331	TAGAAGACGCACCGGACAGATGCATAGGATTCTAAGGTTAATATTCATAGCCTTAGAATCCTGTGCGTCTGTTTTTTTGGCAAGCAAAAGACGGCATACGAGATGTGTGTGTCACAGTACTGTTCGCCGTCTTCGT
TACC3|NM_006342|332	1694	10460	TACC3	NM_006342	332	TAGAAGACGCACCGGGGAACTTTCCAAAGTTGAAATGTTAATATTCATAGCATTTCAGCTTTGGAAAGTTCCTTTTTTGGCAAGCAAAAGACGGCATACGAGATTGGTGTGTCACAGTTGGTTTCGCCGTCTTCGT
TACC3|NM_006342|333	1695	10460	TACC3	NM_006342	333	TAGAAGACGCACCGGAGGAAGTTCTGAGAACTAAATGTTAATATTCATAGCATTTGGTTCTCAGAACTTCCTTTTTTTGGCAAGCAAAAGACGGCATACGAGATGTGTGTGTCACAGTTGCATTCGCCGTCTTCGT
UBE2E3|NM_006357|334	1696	10477	UBE2E3	NM_006357	334	TAGAAGACGCACCGGAGAGTAGAACACGATAGGATAGTTAATATTCATAGCTATCCTGTCGTGTTCTGCTCTTTTTTTGGCAAGCAAAAGACGGCATACGAGATACGTGTGTCACAGTTGACTTCGCCGTCTTCGT
UBE2E3|NM_006357|335	1697	10477	UBE2E3	NM_006357	335	TAGAAGACGCACCGGGGAAGTATAGCCACTTAGTATGTTAATATTCATAGCATACTGAGTGGCTATGCTTCCTTTTTTGGCAAGCAAAAGACGGCATACGAGATCAGTGTGTCACAGTTGTGTTCGCCGTCTTCGT
UBE2E3|NM_006357|336	1698	10477	UBE2E3	NM_006357	336	TAGAAGACGCACCGGGGTTACTTTCTGCACTAGAATGTTAATATTCATAGCATTCTGGTGCGGAAAGTAACCTTTTTTGGCAAGCAAAAGACGGCATACGAGATTGGTGTGTCACACAGTGTTTCGCCGTCTTCGT
UBE2E3|NM_006357|337	1699	10477	UBE2E3	NM_006357	337	TAGAAGACGCACCGGTCAGAAGGAGCTAGTTGAAATGTTAATATTCATAGCATTTCAGCTAGCTCCTTCTGATTTTTTGGCAAGCAAAAGACGGCATACGAGATGTGTGTGTCACACAGTCATTCGCCGTCTTCGT
UBE2E3|NM_006357|338	1700	10477	UBE2E3	NM_006357	338	TAGAAGACGCACCGGTGGACATCCTTAAAGATAACTGTTAATATTCATAGCAGTTGTCTTTAAGGATGTCCATTTTTTGGCAAGCAAAAGACGGCATACGAGATACGTGTGTCACACAGTACTTCGCCGTCTTCGT
UBE2E3|NM_006357|339	1701	10477	UBE2E3	NM_006357	339	TAGAAGACGCACCGGTGGGCCTAAAGGAGATAATATGTTAATATTCATAGCATGTTATCTCCTTTAGGCCCATTTTTTGGCAAGCAAAAGACGGCATACGAGATCAGTGTGTCACACAGTTGTTCGCCGTCTTCGT
UBE2E3|NM_006357|340	1702	10477	UBE2E3	NM_006357	340	TAGAAGACGCACCGGGCTTTGACTATTTCAAAGGTTGTTAATATTCATAGCAACCTTTGAAATAGTCAAAGCTTTTTTGGCAAGCAAAAGACGGCATACGAGATGTGTGTGTCACACACAGTTTCGCCGTCTTCGT
UBE2E3|NM_006357|341	1703	10477	UBE2E3	NM_006357	341	TAGAAGACGCACCGGCCACTGCTAAGTTATCTACTAGTTAATATTCATAGCTAGTGGATAACTTAGCAGTGGTTTTTTGGCAAGCAAAAGACGGCATACGAGATCAGTGTGTCACACACACATTCGCCGTCTTCGT
CARM1|NM_199141|342	1704	10498	CARM1	NM_199141	342	TAGAAGACGCACCGGCGATTTCTGTTCCTTCTATAAGTTAATATTCATAGCTTGTAGAAGGAACAGAAATCGTTTTTTGGCAAGCAAAAGACGGCATACGAGATTGGTGTGTCACACACAACTTCGCCGTCTTCGT
CARM1|NM_199141|343	1705	10498	CARM1	NM_199141	343	TAGAAGACGCACCGGGCAGAATATGATGCAGGATTAGTTAATATTCATAGCTAGTCCTGCATCATGTTCTGCTTTTTTGGCAAGCAAAAGACGGCATACGAGATACGTGTGTCACACACATGTTCGCCGTCTTCGT
CARM1|NM_199141|344	1706	10498	CARM1	NM_199141	344	TAGAAGACGCACCGGCTATGACTTGAGTAGTGTTATGTTAATATTCATAGCATAACACTGCTCAAGTCATAGTTTTTTGGCAAGCAAAAGACGGCATACGAGATCAGTGTGTCACACAACGTTTCGCCGTCTTCGT
CARM1|NM_199141|345	1707	10498	CARM1	NM_199141	345	TAGAAGACGCACCGGTGCTTTCATCGGCTCTATAATGTTAATATTCATAGCATTATGGAGCCGATGAAAGCATTTTTTGGCAAGCAAAAGACGGCATACGAGATACGTGTGTCACACAACCATTCGCCGTCTTCGT
CARM1|NM_199141|346	1708	10498	CARM1	NM_199141	346	TAGAAGACGCACCGGTGAACTTCTTAGAAGCTAAAGGTTAATATTCATAGCCTTTGGCTTCTAAGAAGTTCATTTTTTGGCAAGCAAAAGACGGCATACGAGATGTGTGTGTCACACAACACTTCGCCGTCTTCGT
CARM1|NM_199141|347	1709	10498	CARM1	NM_199141	347	TAGAAGACGCACCGGGAGGTCTTGGTGAGGAGTAATGTTAATATTCATAGCGTTACTCTTCACCAAGACCTCTTTTTTGGCAAGCAAAAGACGGCATACGAGATTGGTGTGTCACACAACTGTTCGCCGTCTTCGT
CARM1|NM_199141|348	1710	10498	CARM1	NM_199141	348	TAGAAGACGCACCGGGAAGGTGTGTGTGTCTTTGAGGTTAATATTCATAGCCTTAAAGACACACACATCTTCTTTTTTGGCAAGCAAAAGACGGCATACGAGATACGTGTGTCACACATGGTTTCGCCGTCTTCGT
CARM1|NM_199141|349	1711	10498	CARM1	NM_199141	349	TAGAAGACGCACCGGGATTTCTGTTCCTTCTATAACGTTAATATTCATAGCGTTGTAGAAGGAACAGAAATCTTTTTTGGCAAGCAAAAGACGGCATACGAGATTGGTGTGTCACACATGCATTCGCCGTCTTCGT
NCOA2|NM_006540|350	1712	10499	NCOA2	NM_006540	350	TAGAAGACGCACCGGGCACTCTTGTTGTTGCATAAAGTTAATATTCATAGCTTTGTGCAGCAACAAGAGTGCTTTTTTGGCAAGCAAAAGACGGCATACGAGATCAGTGTGTCACACATGACTTCGCCGTCTTCGT
NCOA2|NM_006540|351	1713	10499	NCOA2	NM_006540	351	TAGAAGACGCACCGGCCAGGAATGATGGGTAATTAAGTTAATATTCATAGCTTGATTACCCATCATTCCTGGTTTTTTGGCAAGCAAAAGACGGCATACGAGATGTGTGTGTCACACATGTGTTCGCCGTCTTCGT
NCOA2|NM_006540|352	1714	10499	NCOA2	NM_006540	352	TAGAAGACGCACCGGGCACAGGAAATAGCTATAGTTGTTAATATTCATAGCAACTATGGCTATTTCCTGTGCTTTTTTGGCAAGCAAAAGACGGCATACGAGATACGTGTGTCACAACGTGTTTCGCCGTCTTCGT
NCOA2|NM_006540|353	1715	10499	NCOA2	NM_006540	353	TAGAAGACGCACCGGGCTGCTTGGAATGGATATGGTGTTAATATTCATAGCATCATATCCATTCCAGGCAGCTTTTTTGGCAAGCAAAAGACGGCATACGAGATTGGTGTGTCACAACGTCATTCGCCGTCTTCGT
NCOA2|NM_006540|354	1716	10499	NCOA2	NM_006540	354	TAGAAGACGCACCGGCTTCGCTATTTGCTAGATAAAGTTAATATTCATAGCTTTATCTAGCAAATAGCGAAGTTTTTTGGCAAGCAAAAGACGGCATACGAGATCAGTGTGTCACAACGTACTTCGCCGTCTTCGT
NCOA2|NM_006540|355	1717	10499	NCOA2	NM_006540	355	TAGAAGACGCACCGGATCCGTTCTCAGACTATTAATGTTAATATTCATAGCATTAGTAGTCTGAGAACGGATTTTTTTGGCAAGCAAAAGACGGCATACGAGATGTGTGTGTCACAACGTTGTTCGCCGTCTTCGT
NCOA2|NM_006540|356	1718	10499	NCOA2	NM_006540	356	TAGAAGACGCACCGGGCATCTTCGACAGAGATAAATGTTAATATTCATAGCATTTGTCTCTGTCGAAGATGCTTTTTTGGCAAGCAAAAGACGGCATACGAGATTGGTGTGTCACAACCAGTTTCGCCGTCTTCGT
NCOA2|NM_006540|357	1719	10499	NCOA2	NM_006540	357	TAGAAGACGCACCGGGTTGTGTTTGTGTTAGAGAATGTTAATATTCATAGCATTCTCTGACACAAACACAACTTTTTTGGCAAGCAAAAGACGGCATACGAGATGTGTGTGTCACAACCACATTCGCCGTCTTCGT
APPBP2|NM_006380|358	1720	10513	APPBP2	NM_006380	358	TAGAAGACGCACCGGCCAGTGAAGGTTGTGGTGGGTGTTAATATTCATAGCATCCACCACAACTTTCACTGGTTTTTTGGCAAGCAAAAGACGGCATACGAGATACGTGTGTCACAACCAACTTCGCCGTCTTCGT
APPBP2|NM_006380|359	1721	10513	APPBP2	NM_006380	359	TAGAAGACGCACCGGCCCGAGAATATCTAGTTTGATGTTAATATTCATAGCATCAAACTGGATGTTCTCGGGTTTTTTGGCAAGCAAAAGACGGCATACGAGATCAGTGTGTCACAACCATGTTCGCCGTCTTCGT
APPBP2|NM_006380|360	1722	10513	APPBP2	NM_006380	360	TAGAAGACGCACCGGGCTGAAGAAATGCACATTAAAGTTAATATTCATAGCTTTGATGTGCATTTCTTCAGCTTTTTTGGCAAGCAAAAGACGGCATACGAGATGTGTGTGTCACAACACGTTTCGCCGTCTTCGT
APPBP2|NM_006380|361	1723	10513	APPBP2	NM_006380	361	TAGAAGACGCACCGGTCTGATACACTGCTAGATTATGTTAATATTCATAGCATAATCTAGCAGTGTATCAGATTTTTTGGCAAGCAAAAGACGGCATACGAGATCAGTGTGTCACAACACCATTCGCCGTCTTCGT
APPBP2|NM_006380|362	1724	10513	APPBP2	NM_006380	362	TAGAAGACGCACCGGCCATTGGAAATTATGAGAAAGGTTAATATTCATAGCCTTTCTCGTAATTTCCAATGGTTTTTTGGCAAGCAAAAGACGGCATACGAGATTGGTGTGTCACAACACACTTCGCCGTCTTCGT
APPBP2|NM_006380|363	1725	10513	APPBP2	NM_006380	363	TAGAAGACGCACCGGGGTATAGTGATGTTGAGAAAGGTTAATATTCATAGCCTTTCTCAGCATCACTGTACCTTTTTTGGCAAGCAAAAGACGGCATACGAGATACGTGTGTCACAACACTGTTCGCCGTCTTCGT
APPBP2|NM_006380|364	1726	10513	APPBP2	NM_006380	364	TAGAAGACGCACCGGGGACATCTGGTTTCTTTATATGTTAATATTCATAGCATATAAAGAAGCCAGATGTCCTTTTTTGGCAAGCAAAAGACGGCATACGAGATCAGTGTGTCACAACTGGTTTCGCCGTCTTCGT
APPBP2|NM_006380|365	1727	10513	APPBP2	NM_006380	365	TAGAAGACGCACCGGGCACATCAAAGCAATTTAGATGTTAATATTCATAGCATCTGAATTGCTTTGATGTGCTTTTTTGGCAAGCAAAAGACGGCATACGAGATACGTGTGTCACAACTGCATTCGCCGTCTTCGT
NEBL|NM_001173484|366	1728	10529	NEBL	NM_001173484	366	TAGAAGACGCACCGGGTGGCCTACAAGTAGAAATATGTTAATATTCATAGCATGTTTCTGCTTGTAGGCCACTTTTTTGGCAAGCAAAAGACGGCATACGAGATGTGTGTGTCACAACTGACTTCGCCGTCTTCGT
NEBL|NM_001173484|367	1729	10529	NEBL	NM_001173484	367	TAGAAGACGCACCGGGAAGAGGACTTAGGAGTAAATGTTAATATTCATAGCATTTGCTCCTGAGTCCTCTTCTTTTTTGGCAAGCAAAAGACGGCATACGAGATTGGTGTGTCACAACTGTGTTCGCCGTCTTCGT
NEBL|NM_001173484|368	1730	10529	NEBL	NM_001173484	368	TAGAAGACGCACCGGACCTTCTGAGGGAGGAAGGATGTTAATATTCATAGCATTCTTTCTCCCTCAGAAGGTTTTTTTGGCAAGCAAAAGACGGCATACGAGATCAGTGTGTCACATGGTGTTTCGCCGTCTTCGT
NEBL|NM_001173484|369	1731	10529	NEBL	NM_001173484	369	TAGAAGACGCACCGGTCAATGCAGCATTCACTAAATGTTAATATTCATAGCATTTGGTGAATGCTGCATTGATTTTTTGGCAAGCAAAAGACGGCATACGAGATACGTGTGTCACATGGTCATTCGCCGTCTTCGT
NEBL|NM_001173484|370	1732	10529	NEBL	NM_001173484	370	TAGAAGACGCACCGGAGAGATCTGGAGATTGAAATTGTTAATATTCATAGCAATTTCAGTCTCCAGATCTCTTTTTTTGGCAAGCAAAAGACGGCATACGAGATGTGTGTGTCACATGGTACTTCGCCGTCTTCGT
NEBL|NM_001173484|371	1733	10529	NEBL	NM_001173484	371	TAGAAGACGCACCGGGCCTGAAGTAGTAAAGTGAATGTTAATATTCATAGCATTCACTTTGCTGCTTCAGGCTTTTTTGGCAAGCAAAAGACGGCATACGAGATTGGTGTGTCACATGGTTGTTCGCCGTCTTCGT
NEBL|NM_001173484|372	1734	10529	NEBL	NM_001173484	372	TAGAAGACGCACCGGAGCCAAGAGGACATTTGAAATGTTAATATTCATAGCATTTCAGATGTCCTCTTGGCTTTTTTTGGCAAGCAAAAGACGGCATACGAGATACGTGTGTCACATGCAGTTTCGCCGTCTTCGT
BATF|NM_006399|373	1735	10538	BATF	NM_006399	373	TAGAAGACGCACCGGAGCTCATAGAGGAATTGAAGTGTTAATATTCATAGCACTTCAGTTCCTCTGTGAGCTTTTTTTGGCAAGCAAAAGACGGCATACGAGATTGGTGTGTCACATGCACATTCGCCGTCTTCGT
BATF|NM_006399|374	1736	10538	BATF	NM_006399	374	TAGAAGACGCACCGGAGAGTTTAGAGGAGGGAGAAGGTTAATATTCATAGCTTTCTCCCTCCTCTGAACTCTTTTTTTGGCAAGCAAAAGACGGCATACGAGATCAGTGTGTCACATGCAACTTCGCCGTCTTCGT
BATF|NM_006399|375	1737	10538	BATF	NM_006399	375	TAGAAGACGCACCGGGATGTGAGAGGAGTTTAGAGGGTTAATATTCATAGCCCTCTGAACTCTTCTCACATCTTTTTTGGCAAGCAAAAGACGGCATACGAGATGTGTGTGTCACATGCATGTTCGCCGTCTTCGT
BATF|NM_006399|376	1738	10538	BATF	NM_006399	376	TAGAAGACGCACCGGTCATTTGATGATGTGAGAAGAGTTAATATTCATAGCTCTTCTCACATCATCAGATGATTTTTTGGCAAGCAAAAGACGGCATACGAGATTGGTGTGTCACATGACGTTTCGCCGTCTTCGT
BATF|NM_006399|377	1739	10538	BATF	NM_006399	377	TAGAAGACGCACCGGGGACTTATTTGATGATGTGAGGTTAATATTCATAGCCTCACATCATCAGATGAGTCCTTTTTTGGCAAGCAAAAGACGGCATACGAGATGTGTGTGTCACATGACCATTCGCCGTCTTCGT
BATF|NM_006399|378	1740	10538	BATF	NM_006399	378	TAGAAGACGCACCGGGACTCATTTGATGATGTGAGAGTTAATATTCATAGCTCTCACATCATCAGATGAGTCTTTTTTGGCAAGCAAAAGACGGCATACGAGATACGTGTGTCACATGACACTTCGCCGTCTTCGT
PRDX4|NM_006406|379	1741	10549	PRDX4	NM_006406	379	TAGAAGACGCACCGGCCACATTCTTAGAGGTTTCTTGTTAATATTCATAGCAAGAGACCTCTAAGAGTGTGGTTTTTTGGCAAGCAAAAGACGGCATACGAGATCAGTGTGTCACATGACTGTTCGCCGTCTTCGT
PRDX4|NM_006406|380	1742	10549	PRDX4	NM_006406	380	TAGAAGACGCACCGGGCTCTGTTGATTCATAGTTTAGTTAATATTCATAGCTAAACTGTGAATCAACAGAGCTTTTTTGGCAAGCAAAAGACGGCATACGAGATGTGTGTGTCACATGTGGTTTCGCCGTCTTCGT
PRDX4|NM_006406|381	1743	10549	PRDX4	NM_006406	381	TAGAAGACGCACCGGGCACTTAAGCAAAGTGAAGATGTTAATATTCATAGCATCTTCGCTTTGCTTAGGTGCTTTTTTGGCAAGCAAAAGACGGCATACGAGATCAGTGTGTCACATGTGCATTCGCCGTCTTCGT
PRDX4|NM_006406|382	1744	10549	PRDX4	NM_006406	382	TAGAAGACGCACCGGGCTGTGATTGATGGAGAATTTGTTAATATTCATAGCAAATTCTCCATCGATCACAGCTTTTTTGGCAAGCAAAAGACGGCATACGAGATTGGTGTGTCACATGTGACTTCGCCGTCTTCGT
PRDX4|NM_006406|383	1745	10549	PRDX4	NM_006406	383	TAGAAGACGCACCGGTCCAACTGAAATTATCGCTTTGTTAATATTCATAGCAAAGCGATAATTTCAGTTGGATTTTTTGGCAAGCAAAAGACGGCATACGAGATACGTGTGTCACATGTGTGTTCGCCGTCTTCGT
PRDX4|NM_006406|384	1746	10549	PRDX4	NM_006406	384	TAGAAGACGCACCGGGAAACCTGGTAGTGAAATAATGTTAATATTCATAGCATTGTTTCACTACCAGGTTTCTTTTTTGGCAAGCAAAAGACGGCATACGAGATACGTGTGTCAACGTGTGTTTCGCCGTCTTCGT
PRDX4|NM_006406|385	1747	10549	PRDX4	NM_006406	385	TAGAAGACGCACCGGCCAGTTGGAAAGTTGAAGTATGTTAATATTCATAGCATACTTCAGCTTTCCAGCTGGTTTTTTGGCAAGCAAAAGACGGCATACGAGATTGGTGTGTCAACGTGTCATTCGCCGTCTTCGT
PRDX4|NM_006406|386	1748	10549	PRDX4	NM_006406	386	TAGAAGACGCACCGGGTAGATTAGTGGATGAGATACGTTAATATTCATAGCGTGTCTCATCCACTGATCTACTTTTTTGGCAAGCAAAAGACGGCATACGAGATCAGTGTGTCAACGTGTACTTCGCCGTCTTCGT
GNLY|NM_006433|387	1749	10578	GNLY	NM_006433	387	TAGAAGACGCACCGGGAGGATCTTAGGTTGTGTATAGTTAATATTCATAGCTATACACAACCTGAGGTCCTCTTTTTTGGCAAGCAAAAGACGGCATACGAGATGTGTGTGTCAACGTGTTGTTCGCCGTCTTCGT
GNLY|NM_006433|388	1750	10578	GNLY	NM_006433	388	TAGAAGACGCACCGGGAGGAGGTATTAGTTTAGAGTGTTAATATTCATAGCACTCTAGACTGATACCTCCTCTTTTTTGGCAAGCAAAAGACGGCATACGAGATTGGTGTGTCAACGTCAGTTTCGCCGTCTTCGT
GNLY|NM_006433|389	1751	10578	GNLY	NM_006433	389	TAGAAGACGCACCGGTGAGGATCTTAGGTTGTGTATGTTAATATTCATAGCATACACAACCTGAGGTCCTCATTTTTTGGCAAGCAAAAGACGGCATACGAGATGTGTGTGTCAACGTCACATTCGCCGTCTTCGT
GNLY|NM_006433|390	1752	10578	GNLY	NM_006433	390	TAGAAGACGCACCGGACCTGTGTGATGAGGAGAAGTGTTAATATTCATAGCATTTCTCCTCATCACGCAGGTTTTTTTGGCAAGCAAAAGACGGCATACGAGATACGTGTGTCAACGTCAACTTCGCCGTCTTCGT
GNLY|NM_006433|391	1753	10578	GNLY	NM_006433	391	TAGAAGACGCACCGGATTTCATGAGGAGGTATTAGTGTTAATATTCATAGCACTGATACCTCCTCATGAAATTTTTTTGGCAAGCAAAAGACGGCATACGAGATCAGTGTGTCAACGTCATGTTCGCCGTCTTCGT
GNLY|NM_006433|392	1754	10578	GNLY	NM_006433	392	TAGAAGACGCACCGGGAGGTATCAGTCTAGAGTTATGTTAATATTCATAGCGTAACTCTAGACTGATACCTCTTTTTTGGCAAGCAAAAGACGGCATACGAGATGTGTGTGTCAACGTACGTTTCGCCGTCTTCGT
GNLY|NM_006433|393	1755	10578	GNLY	NM_006433	393	TAGAAGACGCACCGGGAAGAAGGTGGTGGATAAGTCGTTAATATTCATAGCGGCTTATCCACCATCTTCTTCTTTTTTGGCAAGCAAAAGACGGCATACGAGATCAGTGTGTCAACGTACCATTCGCCGTCTTCGT
GNLY|NM_006433|394	1756	10578	GNLY	NM_006433	394	TAGAAGACGCACCGGTGAAGAAGATGGTGGATAAGTGTTAATATTCATAGCGCTTATCCACCATCTTCTTCATTTTTTGGCAAGCAAAAGACGGCATACGAGATTGGTGTGTCAACGTACACTTCGCCGTCTTCGT
FARS2|NM_006567|395	1757	10667	FARS2	NM_006567	395	TAGAAGACGCACCGGGAGCACTTCTACAAGTAGTATGTTAATATTCATAGCATACTGCTTGTAGAAGTGCTCTTTTTTGGCAAGCAAAAGACGGCATACGAGATACGTGTGTCAACGTACTGTTCGCCGTCTTCGT
FARS2|NM_006567|396	1758	10667	FARS2	NM_006567	396	TAGAAGACGCACCGGGAGTTATTTGCTGGTATAAAGGTTAATATTCATAGCCTTTATACCAGCAAATAACTCTTTTTTGGCAAGCAAAAGACGGCATACGAGATCAGTGTGTCAACGTTGGTTTCGCCGTCTTCGT
FARS2|NM_006567|397	1759	10667	FARS2	NM_006567	397	TAGAAGACGCACCGGAGTTCTCGTTCTGCGTATAAAGTTAATATTCATAGCTTTATGCGCAGAGCGAGAACTTTTTTTGGCAAGCAAAAGACGGCATACGAGATACGTGTGTCAACGTTGCATTCGCCGTCTTCGT
FARS2|NM_006567|398	1760	10667	FARS2	NM_006567	398	TAGAAGACGCACCGGTCCGGCTGTGATTAATGATATGTTAATATTCATAGCATATCATTGATCACAGCCGGATTTTTTGGCAAGCAAAAGACGGCATACGAGATGTGTGTGTCAACGTTGACTTCGCCGTCTTCGT
FARS2|NM_006567|399	1761	10667	FARS2	NM_006567	399	TAGAAGACGCACCGGTTACCTGAATCGGACTTACATGTTAATATTCATAGCATGTGAGTCCGATTCAGGTAATTTTTTGGCAAGCAAAAGACGGCATACGAGATTGGTGTGTCAACGTTGTGTTCGCCGTCTTCGT
FARS2|NM_006567|400	1762	10667	FARS2	NM_006567	400	TAGAAGACGCACCGGAGTTTCAGCCTCTTAGTAAATGTTAATATTCATAGCATTTGCTAAGAGGCTGAAACTTTTTTTGGCAAGCAAAAGACGGCATACGAGATCAGTGTGTCAACCAGTGTTTCGCCGTCTTCGT
FARS2|NM_006567|401	1763	10667	FARS2	NM_006567	401	TAGAAGACGCACCGGATGGAACAACAACTGGTTAATGTTAATATTCATAGCATTGACCAGTTGTTGTTCCATTTTTTTGGCAAGCAAAAGACGGCATACGAGATACGTGTGTCAACCAGTCATTCGCCGTCTTCGT
FARS2|NM_006567|402	1764	10667	FARS2	NM_006567	402	TAGAAGACGCACCGGCCTGCAGTTCTTTGAATAAAGGTTAATATTCATAGCCTTTGTTCAAAGAGCTGCAGGTTTTTTGGCAAGCAAAAGACGGCATACGAGATGTGTGTGTCAACCAGTACTTCGCCGTCTTCGT
TNFSF13B|NM_001145645|403	1765	10673	TNFSF13B	NM_001145645	403	TAGAAGACGCACCGGGTGACTTTGTTTCGATGTATTGTTAATATTCATAGCAATACATCGAAACAAAGTCACTTTTTTGGCAAGCAAAAGACGGCATACGAGATTGGTGTGTCAACCAGTTGTTCGCCGTCTTCGT
TNFSF13B|NM_001145645|404	1766	10673	TNFSF13B	NM_001145645	404	TAGAAGACGCACCGGCTACGCTATGGGACATTTAATGTTAATATTCATAGCATTAGATGTCCCATGGCGTAGTTTTTTGGCAAGCAAAAGACGGCATACGAGATACGTGTGTCAACCACAGTTTCGCCGTCTTCGT
TNFSF13B|NM_001145645|405	1767	10673	TNFSF13B	NM_001145645	405	TAGAAGACGCACCGGCCTGAAACACTACCTAATAATGTTAATATTCATAGCATTATTGGGTAGTGTTTCAGGTTTTTTGGCAAGCAAAAGACGGCATACGAGATTGGTGTGTCAACCACACATTCGCCGTCTTCGT
TNFSF13B|NM_001145645|406	1768	10673	TNFSF13B	NM_001145645	406	TAGAAGACGCACCGGGCAGACAGTGAAATACCAATTGTTAATATTCATAGCAGTTGGTGTTTCACTGTCTGCTTTTTTGGCAAGCAAAAGACGGCATACGAGATCAGTGTGTCAACCACAACTTCGCCGTCTTCGT
TNFSF13B|NM_001145645|407	1769	10673	TNFSF13B	NM_001145645	407	TAGAAGACGCACCGGGGTGGCTTTGTTTCGATGTGTGTTAATATTCATAGCATACATCGAAACAAAGTCACCTTTTTTGGCAAGCAAAAGACGGCATACGAGATGTGTGTGTCAACCACATGTTCGCCGTCTTCGT
TNFSF13B|NM_001145645|408	1770	10673	TNFSF13B	NM_001145645	408	TAGAAGACGCACCGGGAAGAAACAGTCACTTAAGACGTTAATATTCATAGCGTCTTGAGTGACTGTTTCTTCTTTTTTGGCAAGCAAAAGACGGCATACGAGATTGGTGTGTCAACCAACGTTTCGCCGTCTTCGT
TNFSF13B|NM_001145645|409	1771	10673	TNFSF13B	NM_001145645	409	TAGAAGACGCACCGGCTATTCAGCTGGCATTGTAAAGTTAATATTCATAGCTTTGCAATGCCAGCTGAATAGTTTTTTGGCAAGCAAAAGACGGCATACGAGATGTGTGTGTCAACCAACCATTCGCCGTCTTCGT
TNFSF13B|NM_001145645|410	1772	10673	TNFSF13B	NM_001145645	410	TAGAAGACGCACCGGATGGATGATTCCATAGAAAGGGTTAATATTCATAGCCCTTTCTGTGGAGTCATCCATTTTTTTGGCAAGCAAAAGACGGCATACGAGATACGTGTGTCAACCAACACTTCGCCGTCTTCGT
EBP|NM_006579|411	1773	10682	EBP	NM_006579	411	TAGAAGACGCACCGGGCACCTAAGATTGGACAATTTGTTAATATTCATAGCAAGTTGTCCAGTCTTAGGTGCTTTTTTGGCAAGCAAAAGACGGCATACGAGATCAGTGTGTCAACCAACTGTTCGCCGTCTTCGT
EBP|NM_006579|412	1774	10682	EBP	NM_006579	412	TAGAAGACGCACCGGCTCCGCTTTATTCTACAGTTTGTTAATATTCATAGCAAGCTGTAGAATGAAGCGGAGTTTTTTGGCAAGCAAAAGACGGCATACGAGATGTGTGTGTCAACCATGGTTTCGCCGTCTTCGT
EBP|NM_006579|413	1775	10682	EBP	NM_006579	413	TAGAAGACGCACCGGCTGGACAACTTTGTACTTAATGTTAATATTCATAGCATTAGGTACAAAGTTGTCCAGTTTTTTGGCAAGCAAAAGACGGCATACGAGATCAGTGTGTCAACCATGCATTCGCCGTCTTCGT
EBP|NM_006579|414	1776	10682	EBP	NM_006579	414	TAGAAGACGCACCGGAAAGCCAAGAGCAAGAAGAATGTTAATATTCATAGCGTTCTTCTTGCTCTTGGCTTTTTTTTTGGCAAGCAAAAGACGGCATACGAGATTGGTGTGTCAACCATGACTTCGCCGTCTTCGT
EBP|NM_006579|415	1777	10682	EBP	NM_006579	415	TAGAAGACGCACCGGGGTTCGTTCTTTACTATGAAGGTTAATATTCATAGCCTTCGTAGTAGAGAACGAACCTTTTTTGGCAAGCAAAAGACGGCATACGAGATACGTGTGTCAACCATGTGTTCGCCGTCTTCGT
EBP|NM_006579|416	1778	10682	EBP	NM_006579	416	TAGAAGACGCACCGGCTCTGGAAAGGGTATGCTAAGGTTAATATTCATAGCCTTGGCATACTCTTTCCAGAGTTTTTTGGCAAGCAAAAGACGGCATACGAGATGTGTGTGTCAACACGTGTTTCGCCGTCTTCGT
EBP|NM_006579|417	1779	10682	EBP	NM_006579	417	TAGAAGACGCACCGGGATACATCTTGGGTGACAATTGTTAATATTCATAGCAGTTGTCACCCAGGATGTATCTTTTTTGGCAAGCAAAAGACGGCATACGAGATCAGTGTGTCAACACGTCATTCGCCGTCTTCGT
EBP|NM_006579|418	1780	10682	EBP	NM_006579	418	TAGAAGACGCACCGGCACCTTCTCTATTTCTGGTTTGTTAATATTCATAGCAAACCAGAAGTAGAGAGGGTGTTTTTTGGCAAGCAAAAGACGGCATACGAGATTGGTGTGTCAACACGTACTTCGCCGTCTTCGT
PLK4|NM_001190799|419	1781	10733	PLK4	NM_001190799	419	TAGAAGACGCACCGGCGTTGGTTGTTCATAGGTTAAGTTAATATTCATAGCTTAACCTGTGAGCAACCAACGTTTTTTGGCAAGCAAAAGACGGCATACGAGATACGTGTGTCAACACGTTGTTCGCCGTCTTCGT
PLK4|NM_001190799|420	1782	10733	PLK4	NM_001190799	420	TAGAAGACGCACCGGGAACGATGTTACTCAGTAGAAGTTAATATTCATAGCTTCTGCTGAGTGACATCGTTCTTTTTTGGCAAGCAAAAGACGGCATACGAGATCAGTGTGTCAACACCAGTTTCGCCGTCTTCGT
PLK4|NM_001190799|421	1783	10733	PLK4	NM_001190799	421	TAGAAGACGCACCGGGCAATTATGTGTATCTGGTATGTTAATATTCATAGCATACCAGATACACATAATTGCTTTTTTGGCAAGCAAAAGACGGCATACGAGATACGTGTGTCAACACCACATTCGCCGTCTTCGT
PLK4|NM_001190799|422	1784	10733	PLK4	NM_001190799	422	TAGAAGACGCACCGGCCCTCTATGGTTATAAATGAAGTTAATATTCATAGCTTCATTTGTAACCATAGAGGGTTTTTTGGCAAGCAAAAGACGGCATACGAGATGTGTGTGTCAACACCAACTTCGCCGTCTTCGT
PLK4|NM_001190799|423	1785	10733	PLK4	NM_001190799	423	TAGAAGACGCACCGGCCAGTATAAGTGGTAGTTTATGTTAATATTCATAGCATAAACTACCACTTATACTGGTTTTTTGGCAAGCAAAAGACGGCATACGAGATTGGTGTGTCAACACCATGTTCGCCGTCTTCGT
PLK4|NM_001190799|424	1786	10733	PLK4	NM_001190799	424	TAGAAGACGCACCGGCCTCACCAAATGGTCAAATAAGTTAATATTCATAGCTTGTTTGACCATTTGGTGAGGTTTTTTGGCAAGCAAAAGACGGCATACGAGATACGTGTGTCAACACACGTTTCGCCGTCTTCGT
PLK4|NM_001190799|425	1787	10733	PLK4	NM_001190799	425	TAGAAGACGCACCGGGCCACAATTTCTACTGTAATTGTTAATATTCATAGCAATTGCAGTAGAAATTGTGGCTTTTTTGGCAAGCAAAAGACGGCATACGAGATTGGTGTGTCAACACACCATTCGCCGTCTTCGT
PLK4|NM_001190799|426	1788	10733	PLK4	NM_001190799	426	TAGAAGACGCACCGGGCATCTCAAGAATATGTGAAAGTTAATATTCATAGCTTTCACATATTCTTGAGATGCTTTTTTGGCAAGCAAAAGACGGCATACGAGATCAGTGTGTCAACACACACTTCGCCGTCTTCGT
CHL1|NM_001253387|427	1789	10752	CHL1	NM_001253387	427	TAGAAGACGCACCGGCGTCCATTGATACAAATCAAAGTTAATATTCATAGCTTTGGTTTGTATCAATGGACGTTTTTTGGCAAGCAAAAGACGGCATACGAGATGTGTGTGTCAACACACTGTTCGCCGTCTTCGT
CHL1|NM_001253387|428	1790	10752	CHL1	NM_001253387	428	TAGAAGACGCACCGGCCATTGATACAAACCAAAGATGTTAATATTCATAGCATCTTTGGTTTGTATCAATGGTTTTTTGGCAAGCAAAAGACGGCATACGAGATTGGTGTGTCAACACTGGTTTCGCCGTCTTCGT
CHL1|NM_001253387|429	1791	10752	CHL1	NM_001253387	429	TAGAAGACGCACCGGGATGGAGAAGTCTTTGAAATTGTTAATATTCATAGCAATTTCAAAGGCTTCTCCATCTTTTTTGGCAAGCAAAAGACGGCATACGAGATGTGTGTGTCAACACTGCATTCGCCGTCTTCGT
CHL1|NM_001253387|430	1792	10752	CHL1	NM_001253387	430	TAGAAGACGCACCGGGAGATAAGAGGGAGAGAATATGTTAATATTCATAGCATATTCTCTCCCTCTTGTCTCTTTTTTGGCAAGCAAAAGACGGCATACGAGATACGTGTGTCAACACTGACTTCGCCGTCTTCGT
CHL1|NM_001253387|431	1793	10752	CHL1	NM_001253387	431	TAGAAGACGCACCGGAGTTCAACAGGTTCCAATAATGTTAATATTCATAGCATTGTTGGAACCTGTTGAACTTTTTTTGGCAAGCAAAAGACGGCATACGAGATCAGTGTGTCAACACTGTGTTCGCCGTCTTCGT
CHL1|NM_001253387|432	1794	10752	CHL1	NM_001253387	432	TAGAAGACGCACCGGGCTGCTTTGCTTCAAATAAATGTTAATATTCATAGCGTTTATTTGAAGCAAAGCAGCTTTTTTGGCAAGCAAAAGACGGCATACGAGATTGGTGTGTCAACTGGTGTTTCGCCGTCTTCGT
CHL1|NM_001253387|433	1795	10752	CHL1	NM_001253387	433	TAGAAGACGCACCGGAAGGAAATCCAGAACTAACATGTTAATATTCATAGCATGTTGGTTCTGGATTTCCTTTTTTTTGGCAAGCAAAAGACGGCATACGAGATGTGTGTGTCAACTGGTCATTCGCCGTCTTCGT
NES|NM_006617|434	1796	10763	NES	NM_006617	434	TAGAAGACGCACCGGGCAGACATTATTGGTGTTAATGTTAATATTCATAGCATTAACACCAATGATGTCTGCTTTTTTGGCAAGCAAAAGACGGCATACGAGATACGTGTGTCAACTGGTACTTCGCCGTCTTCGT
NES|NM_006617|435	1797	10763	NES	NM_006617	435	TAGAAGACGCACCGGGAGTTCTTAAAGTCACTCAAAGTTAATATTCATAGCTTTGAGTGACTTTAAGAACTCTTTTTTGGCAAGCAAAAGACGGCATACGAGATCAGTGTGTCAACTGGTTGTTCGCCGTCTTCGT
NES|NM_006617|436	1798	10763	NES	NM_006617	436	TAGAAGACGCACCGGGGATCTAAATAGGAAGGAAATGTTAATATTCATAGCATTTCCTTCCTGTTTAGATCCTTTTTTGGCAAGCAAAAGACGGCATACGAGATGTGTGTGTCAACTGCAGTTTCGCCGTCTTCGT
NES|NM_006617|437	1799	10763	NES	NM_006617	437	TAGAAGACGCACCGGGCAGTTTGCAGTAGGAAATATGTTAATATTCATAGCATATTTCCTGCTGCAAGCTGCTTTTTTGGCAAGCAAAAGACGGCATACGAGATCAGTGTGTCAACTGCACATTCGCCGTCTTCGT
NES|NM_006617|438	1800	10763	NES	NM_006617	438	TAGAAGACGCACCGGGAGGAGGTAGATAAGGAAGGTGTTAATATTCATAGCACTTTCCTTGTCTACCTCCTCTTTTTTGGCAAGCAAAAGACGGCATACGAGATTGGTGTGTCAACTGCAACTTCGCCGTCTTCGT
NES|NM_006617|439	1801	10763	NES	NM_006617	439	TAGAAGACGCACCGGACTGTGGACTCTAGAAGAAATGTTAATATTCATAGCATTTCTTCTGGAGTCCACAGTTTTTTTGGCAAGCAAAAGACGGCATACGAGATACGTGTGTCAACTGCATGTTCGCCGTCTTCGT
NES|NM_006617|440	1802	10763	NES	NM_006617	440	TAGAAGACGCACCGGGAGACATTAGAAAGGGAGAATGTTAATATTCATAGCATTCTCCCTTTCTAGTGTCTCTTTTTTGGCAAGCAAAAGACGGCATACGAGATCAGTGTGTCAACTGACGTTTCGCCGTCTTCGT
NES|NM_006617|441	1803	10763	NES	NM_006617	441	TAGAAGACGCACCGGGGACCAAGAGATATTGAGAATGTTAATATTCATAGCGTTCTCAATGTCTCTTGGTCCTTTTTTGGCAAGCAAAAGACGGCATACGAGATACGTGTGTCAACTGACCATTCGCCGTCTTCGT
CCR9|NM_001256369|442	1804	10803	CCR9	NM_001256369	442	TAGAAGACGCACCGGGCACATATTTGGAGGGAGAAGGTTAATATTCATAGCTTTCTCCCTCCAAGTATGTGCTTTTTTGGCAAGCAAAAGACGGCATACGAGATGTGTGTGTCAACTGACACTTCGCCGTCTTCGT
CCR9|NM_001256369|443	1805	10803	CCR9	NM_001256369	443	TAGAAGACGCACCGGGAAGAATTTGGGTTGCATTAGGTTAATATTCATAGCCTGATGCAACCCAAGTTCTTCTTTTTTGGCAAGCAAAAGACGGCATACGAGATTGGTGTGTCAACTGACTGTTCGCCGTCTTCGT
CCR9|NM_001256369|444	1806	10803	CCR9	NM_001256369	444	TAGAAGACGCACCGGGTGGACAGGTATATTGCTATTGTTAATATTCATAGCAATGGCAATGTACCTGTCCACTTTTTTGGCAAGCAAAAGACGGCATACGAGATACGTGTGTCAACTGTGGTTTCGCCGTCTTCGT
CCR9|NM_001256369|445	1807	10803	CCR9	NM_001256369	445	TAGAAGACGCACCGGTGTGCCGTTTCTACCAATATTGTTAATATTCATAGCAATGTTGGTGGAAACGGCACATTTTTTGGCAAGCAAAAGACGGCATACGAGATTGGTGTGTCAACTGTGCATTCGCCGTCTTCGT
CCR9|NM_001256369|446	1808	10803	CCR9	NM_001256369	446	TAGAAGACGCACCGGCCAGTGGGTTTCATTTATAAGGTTAATATTCATAGCCTTGTAAATGAAACCCACTGGTTTTTTGGCAAGCAAAAGACGGCATACGAGATCAGTGTGTCAACTGTGACTTCGCCGTCTTCGT
CCR9|NM_001256369|447	1809	10803	CCR9	NM_001256369	447	TAGAAGACGCACCGGGCTGTGTGTTGTTGATTATGTGTTAATATTCATAGCACATGATCAGCAACACACAGCTTTTTTGGCAAGCAAAAGACGGCATACGAGATGTGTGTGTCAACTGTGTGTTCGCCGTCTTCGT
NEU3|NM_006656|448	1810	10825	NEU3	NM_006656	448	TAGAAGACGCACCGGCCGAGCTACAGACTAATATAAGTTAATATTCATAGCTTATATTGGTCTGTAGCTCGGTTTTTTGGCAAGCAAAAGACGGCATACGAGATTGGTGTGTCATGGTGTGTTTCGCCGTCTTCGT
NEU3|NM_006656|449	1811	10825	NEU3	NM_006656	449	TAGAAGACGCACCGGAGTGACAACATGCTCTTTCAAGTTAATATTCATAGCTTGAAGGAGCATGTTGTCACTTTTTTTGGCAAGCAAAAGACGGCATACGAGATGTGTGTGTCATGGTGTCATTCGCCGTCTTCGT
NEU3|NM_006656|450	1812	10825	NEU3	NM_006656	450	TAGAAGACGCACCGGGCAGGAGGGTGGTTGTGTGTTGTTAATATTCATAGCAACACACAACCACTCTTCTGCTTTTTTGGCAAGCAAAAGACGGCATACGAGATACGTGTGTCATGGTGTACTTCGCCGTCTTCGT
NEU3|NM_006656|451	1813	10825	NEU3	NM_006656	451	TAGAAGACGCACCGGTGGCCACTCTGTGTTATATTGGTTAATATTCATAGCCAATATAGCACAGGGTGGCCATTTTTTGGCAAGCAAAAGACGGCATACGAGATCAGTGTGTCATGGTGTTGTTCGCCGTCTTCGT
NEU3|NM_006656|452	1814	10825	NEU3	NM_006656	452	TAGAAGACGCACCGGGGGTTGACTTAGGTATCTATTGTTAATATTCATAGCGATAGATACCTAGGTCAACCCTTTTTTGGCAAGCAAAAGACGGCATACGAGATGTGTGTGTCATGGTCAGTTTCGCCGTCTTCGT
NEU3|NM_006656|453	1815	10825	NEU3	NM_006656	453	TAGAAGACGCACCGGGACTGGTTATCCCTGTGTATAGTTAATATTCATAGCTATACGCAGGGATGACCAGTCTTTTTTGGCAAGCAAAAGACGGCATACGAGATCAGTGTGTCATGGTCACATTCGCCGTCTTCGT
NEU3|NM_006656|454	1816	10825	NEU3	NM_006656	454	TAGAAGACGCACCGGACTTGATTGAGGAGGTTATTGGTTAATATTCATAGCCAATGACCTCCTCAGTCAAGTTTTTTTGGCAAGCAAAAGACGGCATACGAGATTGGTGTGTCATGGTCAACTTCGCCGTCTTCGT
NEU3|NM_006656|455	1817	10825	NEU3	NM_006656	455	TAGAAGACGCACCGGGGCCTATGGTTATAGTAGAATGTTAATATTCATAGCATTCTACTGTAACCATGGGCCTTTTTTGGCAAGCAAAAGACGGCATACGAGATACGTGTGTCATGGTCATGTTCGCCGTCTTCGT
ALDH1L1|NM_001270364|456	1818	10840	ALDH1L1	NM_001270364	456	TAGAAGACGCACCGGGACCCTTATTCATGGAGATAAGTTAATATTCATAGCTTATCTCCGTGAATGAGGGTCTTTTTTGGCAAGCAAAAGACGGCATACGAGATCAGTGTGTCATGGTACGTTTCGCCGTCTTCGT
ALDH1L1|NM_001270364|457	1819	10840	ALDH1L1	NM_001270364	457	TAGAAGACGCACCGGAATGCTGTTGGTGAAGAATATGTTAATATTCATAGCATATTCTTCACCAGCAGCATTTTTTTTGGCAAGCAAAAGACGGCATACGAGATACGTGTGTCATGGTACCATTCGCCGTCTTCGT
ALDH1L1|NM_001270364|458	1820	10840	ALDH1L1	NM_001270364	458	TAGAAGACGCACCGGAGGACCTCTGAGACCATTAATGTTAATATTCATAGCATTGATGGTCTCAGAGGTCTTTTTTTTGGCAAGCAAAAGACGGCATACGAGATGTGTGTGTCATGGTACACTTCGCCGTCTTCGT
ALDH1L1|NM_001270364|459	1821	10840	ALDH1L1	NM_001270364	459	TAGAAGACGCACCGGGTTCTAGATAAGGATGGAAAGGTTAATATTCATAGCCTTTCCATCCTTGTCTGGAACTTTTTTGGCAAGCAAAAGACGGCATACGAGATTGGTGTGTCATGGTACTGTTCGCCGTCTTCGT
ALDH1L1|NM_001270364|460	1822	10840	ALDH1L1	NM_001270364	460	TAGAAGACGCACCGGGTGGAGGATTCCATTTATGATGTTAATATTCATAGCATCATGAATGGAGTCCTCCACTTTTTTGGCAAGCAAAAGACGGCATACGAGATACGTGTGTCATGGTTGGTTTCGCCGTCTTCGT
ALDH1L1|NM_001270364|461	1823	10840	ALDH1L1	NM_001270364	461	TAGAAGACGCACCGGGAAGTTTGCAGAGCTGATATTGTTAATATTCATAGCAATGTCAGCTCTGCAAACTTCTTTTTTGGCAAGCAAAAGACGGCATACGAGATTGGTGTGTCATGGTTGCATTCGCCGTCTTCGT
ALDH1L1|NM_001270364|462	1824	10840	ALDH1L1	NM_001270364	462	TAGAAGACGCACCGGAGAGGCCTGTGAATAGAAATTGTTAATATTCATAGCAGTTTCTGTTCACAGGCCTCTTTTTTTGGCAAGCAAAAGACGGCATACGAGATCAGTGTGTCATGGTTGACTTCGCCGTCTTCGT
ALDH1L1|NM_001270364|463	1825	10840	ALDH1L1	NM_001270364	463	TAGAAGACGCACCGGTCAAGACAGTGACCTTTGAATGTTAATATTCATAGCATTCGAAGGTCACTGTCTTGATTTTTTGGCAAGCAAAAGACGGCATACGAGATGTGTGTGTCATGGTTGTGTTCGCCGTCTTCGT
PDE10A|NM_001130690|464	1826	10846	PDE10A	NM_001130690	464	TAGAAGACGCACCGGCGGATCACTAAACCTTAATAAGTTAATATTCATAGCTTATTAAGGTTTAGTGATCCGTTTTTTGGCAAGCAAAAGACGGCATACGAGATACGTGTGTCATGCAGTGTTTCGCCGTCTTCGT
PDE10A|NM_001130690|465	1827	10846	PDE10A	NM_001130690	465	TAGAAGACGCACCGGCCGATGGATTTGCATTGTATTGTTAATATTCATAGCAATACAGTGCAAATCCATCGGTTTTTTGGCAAGCAAAAGACGGCATACGAGATTGGTGTGTCATGCAGTCATTCGCCGTCTTCGT
PDE10A|NM_001130690|466	1828	10846	PDE10A	NM_001130690	466	TAGAAGACGCACCGGCCATAAGAACAAGGAGTTATAGTTAATATTCATAGCTATAACTCCTTGTTCTTATGGTTTTTTGGCAAGCAAAAGACGGCATACGAGATCAGTGTGTCATGCAGTACTTCGCCGTCTTCGT
PDE10A|NM_001130690|467	1829	10846	PDE10A	NM_001130690	467	TAGAAGACGCACCGGGAAGTCAGTAGGTACTAAGATGTTAATATTCATAGCATCTTGGTACCTGCTGACTTCTTTTTTGGCAAGCAAAAGACGGCATACGAGATGTGTGTGTCATGCAGTTGTTCGCCGTCTTCGT
PDE10A|NM_001130690|468	1830	10846	PDE10A	NM_001130690	468	TAGAAGACGCACCGGAAGGCAGTTGCATTTGAAGATGTTAATATTCATAGCATCTTCAGATGCAGCTGCCTTTTTTTTGGCAAGCAAAAGACGGCATACGAGATTGGTGTGTCATGCACAGTTTCGCCGTCTTCGT
PDE10A|NM_001130690|469	1831	10846	PDE10A	NM_001130690	469	TAGAAGACGCACCGGGTGGCAAGGTTTCATGTAATTGTTAATATTCATAGCAATTGCATGAGACCTTGCCACTTTTTTGGCAAGCAAAAGACGGCATACGAGATGTGTGTGTCATGCACACATTCGCCGTCTTCGT
PDE10A|NM_001130690|470	1832	10846	PDE10A	NM_001130690	470	TAGAAGACGCACCGGGTGCAGAGATAGTAGAGAAATGTTAATATTCATAGCATTTCTCTACTGTCTCTGCACTTTTTTGGCAAGCAAAAGACGGCATACGAGATACGTGTGTCATGCACAACTTCGCCGTCTTCGT
PDE10A|NM_001130690|471	1833	10846	PDE10A	NM_001130690	471	TAGAAGACGCACCGGCGTGTGTCTCTGTAAAGAAATGTTAATATTCATAGCATTTCTTTGCAGAGACGCACGTTTTTTGGCAAGCAAAAGACGGCATACGAGATCAGTGTGTCATGCACATGTTCGCCGTCTTCGT
HPSE|NM_001098540|472	1834	10855	HPSE	NM_001098540	472	TAGAAGACGCACCGGGTTTCCTTAAGAAGGTTGATAGTTAATATTCATAGCTATCAGCCTTCTTAAGGAAACTTTTTTGGCAAGCAAAAGACGGCATACGAGATGTGTGTGTCATGCAACGTTTCGCCGTCTTCGT
HPSE|NM_001098540|473	1835	10855	HPSE	NM_001098540	473	TAGAAGACGCACCGGGCGTTATTAAGAACAGTAGATGTTAATATTCATAGCATCTGCTGTTCTTAATAACGCTTTTTTGGCAAGCAAAAGACGGCATACGAGATCAGTGTGTCATGCAACCATTCGCCGTCTTCGT
HPSE|NM_001098540|474	1836	10855	HPSE	NM_001098540	474	TAGAAGACGCACCGGGCAGATTTGTAGTGGAATAGTGTTAATATTCATAGCACTGTTCCACTGCAAATCTGCTTTTTTGGCAAGCAAAAGACGGCATACGAGATTGGTGTGTCATGCAACACTTCGCCGTCTTCGT
HPSE|NM_001098540|475	1837	10855	HPSE	NM_001098540	475	TAGAAGACGCACCGGTATTCTTTGGAGCAGGAAATTGTTAATATTCATAGCAGTTTCCTGCTCCAAAGAATATTTTTTGGCAAGCAAAAGACGGCATACGAGATACGTGTGTCATGCAACTGTTCGCCGTCTTCGT
HPSE|NM_001098540|476	1838	10855	HPSE	NM_001098540	476	TAGAAGACGCACCGGATTTCTTGGGAACTAGGTAATGTTAATATTCATAGCATTGCCTAGTTCCCAAGAAATTTTTTTGGCAAGCAAAAGACGGCATACGAGATCAGTGTGTCATGCATGGTTTCGCCGTCTTCGT
HPSE|NM_001098540|477	1839	10855	HPSE	NM_001098540	477	TAGAAGACGCACCGGGTCGTAGTTAGGAGAAGATTTGTTAATATTCATAGCAAATCTTCTCCTAACTGCGACTTTTTTGGCAAGCAAAAGACGGCATACGAGATACGTGTGTCATGCATGCATTCGCCGTCTTCGT
HPSE|NM_001098540|478	1840	10855	HPSE	NM_001098540	478	TAGAAGACGCACCGGGCTTTATGTGGTTGGATAAATGTTAATATTCATAGCATTTATCCAGCCACATAAAGCTTTTTTGGCAAGCAAAAGACGGCATACGAGATGTGTGTGTCATGCATGACTTCGCCGTCTTCGT
HPSE|NM_001098540|479	1841	10855	HPSE	NM_001098540	479	TAGAAGACGCACCGGTCAAACCTTGCCATCTTTAATGTTAATATTCATAGCATTAAAGGTGGCAAGGTTTGATTTTTTGGCAAGCAAAAGACGGCATACGAGATTGGTGTGTCATGCATGTGTTCGCCGTCTTCGT
RUVBL2|NM_006666|480	1842	10856	RUVBL2	NM_006666	480	TAGAAGACGCACCGGCGAGAAAGATACGAAGTAGATGTTAATATTCATAGCATCTGCTTCGTGTCTTTCTCGTTTTTTGGCAAGCAAAAGACGGCATACGAGATCAGTGTGTCATGACGTGTTTCGCCGTCTTCGT
RUVBL2|NM_006666|481	1843	10856	RUVBL2	NM_006666	481	TAGAAGACGCACCGGCCGTGATGTAATAAGGATTGAGTTAATATTCATAGCTCAATCCTTGTTACATCACGGTTTTTTGGCAAGCAAAAGACGGCATACGAGATACGTGTGTCATGACGTCATTCGCCGTCTTCGT
RUVBL2|NM_006666|482	1844	10856	RUVBL2	NM_006666	482	TAGAAGACGCACCGGGCAGTATATGAAGGAGTATCAGTTAATATTCATAGCTGGTACTCCTTCATGTACTGCTTTTTTGGCAAGCAAAAGACGGCATACGAGATGTGTGTGTCATGACGTACTTCGCCGTCTTCGT
RUVBL2|NM_006666|483	1845	10856	RUVBL2	NM_006666	483	TAGAAGACGCACCGGTCCAGATTGATTGACCAGTAAGTTAATATTCATAGCTTGCTGGTCGATCAATCTGGATTTTTTGGCAAGCAAAAGACGGCATACGAGATTGGTGTGTCATGACGTTGTTCGCCGTCTTCGT
RUVBL2|NM_006666|484	1846	10856	RUVBL2	NM_006666	484	TAGAAGACGCACCGGGAAGTCTGTGAGCAGATTAATGTTAATATTCATAGCATTGATCTGCTCACGGACTTCTTTTTTGGCAAGCAAAAGACGGCATACGAGATACGTGTGTCATGACCAGTTTCGCCGTCTTCGT
RUVBL2|NM_006666|485	1847	10856	RUVBL2	NM_006666	485	TAGAAGACGCACCGGGAAGAAGATGTGGGGATGGGTGTTAATATTCATAGCACTCATCTCCACATCTTCTTCTTTTTTGGCAAGCAAAAGACGGCATACGAGATTGGTGTGTCATGACCACATTCGCCGTCTTCGT
RUVBL2|NM_006666|486	1848	10856	RUVBL2	NM_006666	486	TAGAAGACGCACCGGGTGGTGGAGATCTAGATTGGTGTTAATATTCATAGCATCAATCTGGATCTCCACCACTTTTTTGGCAAGCAAAAGACGGCATACGAGATCAGTGTGTCATGACCAACTTCGCCGTCTTCGT
RUVBL2|NM_006666|487	1849	10856	RUVBL2	NM_006666	487	TAGAAGACGCACCGGACAGAGATGGAGATCATTTACGTTAATATTCATAGCGTAGATGGTCTCCATCTCTGTTTTTTTGGCAAGCAAAAGACGGCATACGAGATGTGTGTGTCATGACCATGTTCGCCGTCTTCGT
USP19|NM_001199160|488	1850	10869	USP19	NM_001199160	488	TAGAAGACGCACCGGCCTTCTAAGTTGAAGGCTATTGTTAATATTCATAGCAATGGCCTTCAACTTGGAAGGTTTTTTGGCAAGCAAAAGACGGCATACGAGATTGGTGTGTCATGACACGTTTCGCCGTCTTCGT
USP19|NM_001199160|489	1851	10869	USP19	NM_001199160	489	TAGAAGACGCACCGGGCTGATGAACAGCTTTGTATAGTTAATATTCATAGCTATGCAAAGCTGTTCATCAGCTTTTTTGGCAAGCAAAAGACGGCATACGAGATGTGTGTGTCATGACACCATTCGCCGTCTTCGT
USP19|NM_001199160|490	1852	10869	USP19	NM_001199160	490	TAGAAGACGCACCGGGCGTGACAAGATCAATGATTTGTTAATATTCATAGCAAGTCATTGATCTTGTCACGCTTTTTTGGCAAGCAAAAGACGGCATACGAGATACGTGTGTCATGACACACTTCGCCGTCTTCGT
USP19|NM_001199160|491	1853	10869	USP19	NM_001199160	491	TAGAAGACGCACCGGCGGAGGTAATTAAGAATTGTTGTTAATATTCATAGCAACGATTCTTAATTACCTCCGTTTTTTGGCAAGCAAAAGACGGCATACGAGATCAGTGTGTCATGACACTGTTCGCCGTCTTCGT
USP19|NM_001199160|492	1854	10869	USP19	NM_001199160	492	TAGAAGACGCACCGGAAAGAGACAGGGTCTTGATATGTTAATATTCATAGCATATCGAGACCCTGTCTCTTTTTTTTTGGCAAGCAAAAGACGGCATACGAGATGTGTGTGTCATGACTGGTTTCGCCGTCTTCGT
USP19|NM_001199160|493	1855	10869	USP19	NM_001199160	493	TAGAAGACGCACCGGACAGAGACTGTGGATTTAGATGTTAATATTCATAGCATCTGAATCCACGGTCTCTGTTTTTTTGGCAAGCAAAAGACGGCATACGAGATCAGTGTGTCATGACTGCATTCGCCGTCTTCGT
USP19|NM_001199160|494	1856	10869	USP19	NM_001199160	494	TAGAAGACGCACCGGGCTTCACTGGTCTTGTTAATTGTTAATATTCATAGCAATTGACAAGGCCAGTGAAGCTTTTTTGGCAAGCAAAAGACGGCATACGAGATTGGTGTGTCATGACTGACTTCGCCGTCTTCGT
USP19|NM_001199160|495	1857	10869	USP19	NM_001199160	495	TAGAAGACGCACCGGGAAGTAGAAGGATCGAGTAAAGTTAATATTCATAGCTTTGCTCGATCCTTCTGCTTCTTTTTTGGCAAGCAAAAGACGGCATACGAGATACGTGTGTCATGACTGTGTTCGCCGTCTTCGT
RALBP1|NM_006788|496	1858	10928	RALBP1	NM_006788	496	TAGAAGACGCACCGGCCAGAGAATTTGCTTATCAAAGTTAATATTCATAGCTTTGGTAAGCAAATTCTCTGGTTTTTTGGCAAGCAAAAGACGGCATACGAGATGTGTGTGTCATGTGGTGTTTCGCCGTCTTCGT
RALBP1|NM_006788|497	1859	10928	RALBP1	NM_006788	497	TAGAAGACGCACCGGCCCTACTAAGTTTCTTGGATTGTTAATATTCATAGCAATCCAGGAAACTTAGTAGGGTTTTTTGGCAAGCAAAAGACGGCATACGAGATCAGTGTGTCATGTGGTCATTCGCCGTCTTCGT
RALBP1|NM_006788|498	1860	10928	RALBP1	NM_006788	498	TAGAAGACGCACCGGCCTCTTGATGTAGTGTTTGATGTTAATATTCATAGCATCAGACACTACATCAGGAGGTTTTTTGGCAAGCAAAAGACGGCATACGAGATTGGTGTGTCATGTGGTACTTCGCCGTCTTCGT
RALBP1|NM_006788|499	1861	10928	RALBP1	NM_006788	499	TAGAAGACGCACCGGGCCAGTTTGTTGAAGTAGTATGTTAATATTCATAGCATACTGCTTCAGCAAACTGGCTTTTTTGGCAAGCAAAAGACGGCATACGAGATACGTGTGTCATGTGGTTGTTCGCCGTCTTCGT
RALBP1|NM_006788|500	1862	10928	RALBP1	NM_006788	500	TAGAAGACGCACCGGTACTCAAAGAACTGCTAGAATGTTAATATTCATAGCATTCTGGCAGTTCTTTGAGTATTTTTTGGCAAGCAAAAGACGGCATACGAGATCAGTGTGTCATGTGCAGTTTCGCCGTCTTCGT
RALBP1|NM_006788|501	1863	10928	RALBP1	NM_006788	501	TAGAAGACGCACCGGAGAGCTGAGATTGTTGAAATTGTTAATATTCATAGCAATTTCAGCAATCTCAGCTCTTTTTTTGGCAAGCAAAAGACGGCATACGAGATACGTGTGTCATGTGCACATTCGCCGTCTTCGT
RALBP1|NM_006788|502	1864	10928	RALBP1	NM_006788	502	TAGAAGACGCACCGGCCTCAGATTGATGTTCTAAATGTTAATATTCATAGCATTTGGAACATCAATCTGAGGTTTTTTGGCAAGCAAAAGACGGCATACGAGATGTGTGTGTCATGTGCAACTTCGCCGTCTTCGT
RALBP1|NM_006788|503	1865	10928	RALBP1	NM_006788	503	TAGAAGACGCACCGGGCAGCTGATGTTGTTAAATAGGTTAATATTCATAGCCTGTTTAACAACATCAGCTGCTTTTTTGGCAAGCAAAAGACGGCATACGAGATTGGTGTGTCATGTGCATGTTCGCCGTCTTCGT
PNRC1|NM_006813|504	1866	10957	PNRC1	NM_006813	504	TAGAAGACGCACCGGGCATTTGAAGAAATCAGCATTGTTAATATTCATAGCAATGCTGATTTCTTCAAATGCTTTTTTGGCAAGCAAAAGACGGCATACGAGATACGTGTGTCATGTGACGTTTCGCCGTCTTCGT
PNRC1|NM_006813|505	1867	10957	PNRC1	NM_006813	505	TAGAAGACGCACCGGGCTTGTTCATGGTATATACTTGTTAATATTCATAGCAAGTGTATACCATGAACAAGCTTTTTTGGCAAGCAAAAGACGGCATACGAGATTGGTGTGTCATGTGACCATTCGCCGTCTTCGT
PNRC1|NM_006813|506	1868	10957	PNRC1	NM_006813	506	TAGAAGACGCACCGGCGACCCTCTTCTTCCCTTATTGTTAATATTCATAGCAATGAGGGAGGAAGAGGGTCGTTTTTTGGCAAGCAAAAGACGGCATACGAGATCAGTGTGTCATGTGACACTTCGCCGTCTTCGT
PNRC1|NM_006813|507	1869	10957	PNRC1	NM_006813	507	TAGAAGACGCACCGGGAAGAAGTGGTGAAAGAAGAAGTTAATATTCATAGCTTCTTCTTTCGCCGCTTCTTCTTTTTTGGCAAGCAAAAGACGGCATACGAGATGTGTGTGTCATGTGACTGTTCGCCGTCTTCGT
PNRC1|NM_006813|508	1870	10957	PNRC1	NM_006813	508	TAGAAGACGCACCGGCTTGTATGAGCAACTAAAGATGTTAATATTCATAGCATCTTTGGTTGCTCATACAAGTTTTTTGGCAAGCAAAAGACGGCATACGAGATTGGTGTGTCATGTGTGGTTTCGCCGTCTTCGT
PNRC1|NM_006813|509	1871	10957	PNRC1	NM_006813	509	TAGAAGACGCACCGGAACGCTCCTCAAAGTTTAAACGTTAATATTCATAGCGTTTGAACTTTGAGGAGCGTTTTTTTTGGCAAGCAAAAGACGGCATACGAGATGTGTGTGTCATGTGTGCATTCGCCGTCTTCGT
PNRC1|NM_006813|510	1872	10957	PNRC1	NM_006813	510	TAGAAGACGCACCGGTCATCTGACAGAATTTAGAAGGTTAATATTCATAGCCTTCTGAATTCTGTCAGATGATTTTTTGGCAAGCAAAAGACGGCATACGAGATACGTGTGTCATGTGTGACTTCGCCGTCTTCGT
PNRC1|NM_006813|511	1873	10957	PNRC1	NM_006813	511	TAGAAGACGCACCGGGGATGGGAAGCATTGTTGAAGGTTAATATTCATAGCTTTCAACAGTGCTTCCCATCCTTTTTTGGCAAGCAAAAGACGGCATACGAGATCAGTGTGTCATGTGTGTGTTCGCCGTCTTCGT
MLLT11|NM_006818|512	1874	10962	MLLT11	NM_006818	512	TAGAAGACGCACCGGCTTCGAACTGGATTTGCTTTAGTTAATATTCATAGCTAGAGCAAGTCCAGTTCGAAGTTTTTTGGCAAGCAAAAGACGGCATACGAGATTGGTGTGTACGTGTGTGTTTCGCCGTCTTCGT
MLLT11|NM_006818|513	1875	10962	MLLT11	NM_006818	513	TAGAAGACGCACCGGCCACCTACAAGGTTAAAGATAGTTAATATTCATAGCTGTCTTTGACCTTGTAGGTGGTTTTTTGGCAAGCAAAAGACGGCATACGAGATGTGTGTGTACGTGTGTCATTCGCCGTCTTCGT
MLLT11|NM_006818|514	1876	10962	MLLT11	NM_006818	514	TAGAAGACGCACCGGTCAGATACAGCTACCTATAAGGTTAATATTCATAGCCTTGTAGGTGGCTGTATCTGATTTTTTGGCAAGCAAAAGACGGCATACGAGATACGTGTGTACGTGTGTACTTCGCCGTCTTCGT
MLLT11|NM_006818|515	1877	10962	MLLT11	NM_006818	515	TAGAAGACGCACCGGACAGCCACCTATAAGGTTAAAGTTAATATTCATAGCTTTGACCTTGTAGGTGGCTGTTTTTTTGGCAAGCAAAAGACGGCATACGAGATCAGTGTGTACGTGTGTTGTTCGCCGTCTTCGT
MLLT11|NM_006818|516	1878	10962	MLLT11	NM_006818	516	TAGAAGACGCACCGGACCTACAAGGTTAAAGATAGCGTTAATATTCATAGCGCTGTCTTTGACCTTGTAGGTTTTTTTGGCAAGCAAAAGACGGCATACGAGATGTGTGTGTACGTGTCAGTTTCGCCGTCTTCGT
MLLT11|NM_006818|517	1879	10962	MLLT11	NM_006818	517	TAGAAGACGCACCGGTGTCAGATACAGCTACCTATAGTTAATATTCATAGCTGTAGGTGGCTGTATCTGACATTTTTTGGCAAGCAAAAGACGGCATACGAGATCAGTGTGTACGTGTCACATTCGCCGTCTTCGT
MLLT11|NM_006818|518	1880	10962	MLLT11	NM_006818	518	TAGAAGACGCACCGGCCTTGAGTACAGTACCTTTAAGTTAATATTCATAGCTTGAAGGTGCTGTACTCAAGGTTTTTTGGCAAGCAAAAGACGGCATACGAGATTGGTGTGTACGTGTCAACTTCGCCGTCTTCGT
MLLT11|NM_006818|519	1881	10962	MLLT11	NM_006818	519	TAGAAGACGCACCGGTCTGTCAGATATAGCCACTTAGTTAATATTCATAGCTAGGTGGCTGTATCTGACAGATTTTTTGGCAAGCAAAAGACGGCATACGAGATACGTGTGTACGTGTCATGTTCGCCGTCTTCGT
ASCC3|NM_006828|520	1882	10973	ASCC3	NM_006828	520	TAGAAGACGCACCGGCGCATGATAAACTCAGTCATTGTTAATATTCATAGCAATGGCTGAGTTTATCATGCGTTTTTTGGCAAGCAAAAGACGGCATACGAGATCAGTGTGTACGTGTACGTTTCGCCGTCTTCGT
ASCC3|NM_006828|521	1883	10973	ASCC3	NM_006828	521	TAGAAGACGCACCGGCCCAGATTGTAAGGTTCTTTAGTTAATATTCATAGCTAAGGAGCCTTACAATCTGGGTTTTTTGGCAAGCAAAAGACGGCATACGAGATACGTGTGTACGTGTACCATTCGCCGTCTTCGT
ASCC3|NM_006828|522	1884	10973	ASCC3	NM_006828	522	TAGAAGACGCACCGGGCAGCTTGTAATGCTATTAATGTTAATATTCATAGCATTAGTAGCATTACAAGCTGCTTTTTTGGCAAGCAAAAGACGGCATACGAGATGTGTGTGTACGTGTACACTTCGCCGTCTTCGT
ASCC3|NM_006828|523	1885	10973	ASCC3	NM_006828	523	TAGAAGACGCACCGGCCCAGTAGAATCAAGTTTATTGTTAATATTCATAGCAATAAACTTGATTCTACTGGGTTTTTTGGCAAGCAAAAGACGGCATACGAGATTGGTGTGTACGTGTACTGTTCGCCGTCTTCGT
ASCC3|NM_006828|524	1886	10973	ASCC3	NM_006828	524	TAGAAGACGCACCGGAGCATAGTTGCCTGTACTTTAGTTAATATTCATAGCTAAAGTACGGGCAACTATGCTTTTTTTGGCAAGCAAAAGACGGCATACGAGATACGTGTGTACGTGTTGGTTTCGCCGTCTTCGT
ASCC3|NM_006828|525	1887	10973	ASCC3	NM_006828	525	TAGAAGACGCACCGGCTACTTCAAAGGTGGTATATAGTTAATATTCATAGCTATATACCGCCTTTGAAGTAGTTTTTTGGCAAGCAAAAGACGGCATACGAGATTGGTGTGTACGTGTTGCATTCGCCGTCTTCGT
ASCC3|NM_006828|526	1888	10973	ASCC3	NM_006828	526	TAGAAGACGCACCGGGAAACTCCTCCAGAATAGAATGTTAATATTCATAGCATTCTGTTCTGGAGGAGTTTCTTTTTTGGCAAGCAAAAGACGGCATACGAGATCAGTGTGTACGTGTTGACTTCGCCGTCTTCGT
ASCC3|NM_006828|527	1889	10973	ASCC3	NM_006828	527	TAGAAGACGCACCGGGCTCTTGAATCTTAGTAAAGTGTTAATATTCATAGCACTTTACTAAGATTCAGGAGCTTTTTTGGCAAGCAAAAGACGGCATACGAGATGTGTGTGTACGTGTTGTGTTCGCCGTCTTCGT
IMMT|NM_001100169|528	1890	10989	IMMT	NM_001100169	528	TAGAAGACGCACCGGGCTAAGGTTGTATCTTAGTATGTTAATATTCATAGCATACTGAGATACAACCTTAGCTTTTTTGGCAAGCAAAAGACGGCATACGAGATACGTGTGTACGTCAGTGTTTCGCCGTCTTCGT
IMMT|NM_001100169|529	1891	10989	IMMT	NM_001100169	529	TAGAAGACGCACCGGGATGGAAGGGAATGGGTGTTTGTTAATATTCATAGCAAACACTCATTCCTTTCCATCTTTTTTGGCAAGCAAAAGACGGCATACGAGATTGGTGTGTACGTCAGTCATTCGCCGTCTTCGT
IMMT|NM_001100169|530	1892	10989	IMMT	NM_001100169	530	TAGAAGACGCACCGGGCACTATCCTATATGCTAAATGTTAATATTCATAGCATTTGGCATATAGGATAGTGCTTTTTTGGCAAGCAAAAGACGGCATACGAGATCAGTGTGTACGTCAGTACTTCGCCGTCTTCGT
IMMT|NM_001100169|531	1893	10989	IMMT	NM_001100169	531	TAGAAGACGCACCGGCCAAGCTTTAATCGCAGTTATGTTAATATTCATAGCATAGCTGCGGTTAAAGCTTGGTTTTTTGGCAAGCAAAAGACGGCATACGAGATGTGTGTGTACGTCAGTTGTTCGCCGTCTTCGT
IMMT|NM_001100169|532	1894	10989	IMMT	NM_001100169	532	TAGAAGACGCACCGGGGCTGAATAGGATAGAAAGATGTTAATATTCATAGCATCTTTCTGTCCTGTTCAGCCTTTTTTGGCAAGCAAAAGACGGCATACGAGATTGGTGTGTACGTCACAGTTTCGCCGTCTTCGT
IMMT|NM_001100169|533	1895	10989	IMMT	NM_001100169	533	TAGAAGACGCACCGGGATTCCTATTTCTGGGAAAGTGTTAATATTCATAGCACTTTCCCGGAAATGGGAATCTTTTTTGGCAAGCAAAAGACGGCATACGAGATGTGTGTGTACGTCACACATTCGCCGTCTTCGT
IMMT|NM_001100169|534	1896	10989	IMMT	NM_001100169	534	TAGAAGACGCACCGGGAATGACCCTAGAAATGAAACGTTAATATTCATAGCGTTTCGTTTCTAGGGTCATTCTTTTTTGGCAAGCAAAAGACGGCATACGAGATACGTGTGTACGTCACAACTTCGCCGTCTTCGT
IMMT|NM_001100169|535	1897	10989	IMMT	NM_001100169	535	TAGAAGACGCACCGGCCTATAGAAGCGGCTTAAATTGTTAATATTCATAGCAATTTGAGCCGCTTCTGTAGGTTTTTTGGCAAGCAAAAGACGGCATACGAGATCAGTGTGTACGTCACATGTTCGCCGTCTTCGT
RIPK3|NM_006871|536	1898	11035	RIPK3	NM_006871	536	TAGAAGACGCACCGGCACAGGGTTGGTATAATTATAGTTAATATTCATAGCTATGATTATACCAACCCTGTGTTTTTTGGCAAGCAAAAGACGGCATACGAGATGTGTGTGTACGTCAACGTTTCGCCGTCTTCGT
RIPK3|NM_006871|537	1899	11035	RIPK3	NM_006871	537	TAGAAGACGCACCGGGCACTCTCGTAATGATGTTATGTTAATATTCATAGCATGACATCATTACGAGAGTGCTTTTTTGGCAAGCAAAAGACGGCATACGAGATCAGTGTGTACGTCAACCATTCGCCGTCTTCGT
RIPK3|NM_006871|538	1900	11035	RIPK3	NM_006871	538	TAGAAGACGCACCGGCTACAGCTTTGGGATCTTAATGTTAATATTCATAGCATTAGGATCCCGAAGCTGTAGTTTTTTGGCAAGCAAAAGACGGCATACGAGATTGGTGTGTACGTCAACACTTCGCCGTCTTCGT
RIPK3|NM_006871|539	1901	11035	RIPK3	NM_006871	539	TAGAAGACGCACCGGTCGTAAACTCGAAGGTGATATGTTAATATTCATAGCATATCGCCTTCGAGTTTACGATTTTTTGGCAAGCAAAAGACGGCATACGAGATACGTGTGTACGTCAACTGTTCGCCGTCTTCGT
RIPK3|NM_006871|540	1902	11035	RIPK3	NM_006871	540	TAGAAGACGCACCGGGCCGGCTTTGGTGATTAAATTGTTAATATTCATAGCAATTTAGTCACCAGAGCCGGCTTTTTTGGCAAGCAAAAGACGGCATACGAGATCAGTGTGTACGTCATGGTTTCGCCGTCTTCGT
RIPK3|NM_006871|541	1903	11035	RIPK3	NM_006871	541	TAGAAGACGCACCGGGGCGACCGCTTGTTAATATATGTTAATATTCATAGCATATGTTAACGAGCGGTCGCCTTTTTTGGCAAGCAAAAGACGGCATACGAGATACGTGTGTACGTCATGCATTCGCCGTCTTCGT
RIPK3|NM_006871|542	1904	11035	RIPK3	NM_006871	542	TAGAAGACGCACCGGGTTCGTAAGAAGGCCTTAAAGGTTAATATTCATAGCCTTTAGGGCCTTCTTGCGAACTTTTTTGGCAAGCAAAAGACGGCATACGAGATGTGTGTGTACGTCATGACTTCGCCGTCTTCGT
RIPK3|NM_006871|543	1905	11035	RIPK3	NM_006871	543	TAGAAGACGCACCGGAGGCCATAGGGTTGGTATAGTGTTAATATTCATAGCATTATACCAACCCTGTGGCCTTTTTTTGGCAAGCAAAAGACGGCATACGAGATTGGTGTGTACGTCATGTGTTCGCCGTCTTCGT
GTF2A1L|NM_001193487|544	1906	11036	GTF2A1L	NM_001193487	544	TAGAAGACGCACCGGGCCAGTAGATAGGAAATACTTGTTAATATTCATAGCAAGTGTTTCCTATCTACTGGCTTTTTTGGCAAGCAAAAGACGGCATACGAGATCAGTGTGTACGTACGTGTTTCGCCGTCTTCGT
GTF2A1L|NM_001193487|545	1907	11036	GTF2A1L	NM_001193487	545	TAGAAGACGCACCGGGCATCCAATTCAGTAAGTATTGTTAATATTCATAGCAATACTTGCTGAATTGGATGCTTTTTTGGCAAGCAAAAGACGGCATACGAGATACGTGTGTACGTACGTCATTCGCCGTCTTCGT
GTF2A1L|NM_001193487|546	1908	11036	GTF2A1L	NM_001193487	546	TAGAAGACGCACCGGGAAGGTATAGAGGAATAAGTTGTTAATATTCATAGCAACTTGTTCCTCTATACCTTCTTTTTTGGCAAGCAAAAGACGGCATACGAGATGTGTGTGTACGTACGTACTTCGCCGTCTTCGT
GTF2A1L|NM_001193487|547	1909	11036	GTF2A1L	NM_001193487	547	TAGAAGACGCACCGGGTAGAAGAGGACTCTTTAAATGTTAATATTCATAGCATTTAAAGGGTCCTCTTCTACTTTTTTGGCAAGCAAAAGACGGCATACGAGATTGGTGTGTACGTACGTTGTTCGCCGTCTTCGT
GTF2A1L|NM_001193487|548	1910	11036	GTF2A1L	NM_001193487	548	TAGAAGACGCACCGGCCACAGGTCTCTCAAATAAATGTTAATATTCATAGCATTTGTTTGAGAGACCTGTGGTTTTTTGGCAAGCAAAAGACGGCATACGAGATACGTGTGTACGTACCAGTTTCGCCGTCTTCGT
GTF2A1L|NM_001193487|549	1911	11036	GTF2A1L	NM_001193487	549	TAGAAGACGCACCGGGGTATTCTTCAGCATCTAATTGTTAATATTCATAGCAATTGGATGCTGAAGAATACCTTTTTTGGCAAGCAAAAGACGGCATACGAGATTGGTGTGTACGTACCACATTCGCCGTCTTCGT
GTF2A1L|NM_001193487|550	1912	11036	GTF2A1L	NM_001193487	550	TAGAAGACGCACCGGGATTCATCGAAGCAAGAATAAGTTAATATTCATAGCTTGTTCTTGCTTCGATGAATCTTTTTTGGCAAGCAAAAGACGGCATACGAGATCAGTGTGTACGTACCAACTTCGCCGTCTTCGT
GTF2A1L|NM_001193487|551	1913	11036	GTF2A1L	NM_001193487	551	TAGAAGACGCACCGGCCAGCCTTCAGTAATATAAACGTTAATATTCATAGCGTTTGTATTACTGAAGGCTGGTTTTTTGGCAAGCAAAAGACGGCATACGAGATGTGTGTGTACGTACCATGTTCGCCGTCTTCGT
CPSF6|NM_007007|552	1914	11052	CPSF6	NM_007007	552	TAGAAGACGCACCGGACCATAGTAGATCATGAGAAAGTTAATATTCATAGCTTTCTCGTGATCTACTATGGTTTTTTTGGCAAGCAAAAGACGGCATACGAGATTGGTGTGTACGTACACGTTTCGCCGTCTTCGT
CPSF6|NM_007007|553	1915	11052	CPSF6	NM_007007	553	TAGAAGACGCACCGGAGACCGTCATGATGATTATTAGTTAATATTCATAGCTAATAATCGTCATGACGGTCTTTTTTTGGCAAGCAAAAGACGGCATACGAGATGTGTGTGTACGTACACCATTCGCCGTCTTCGT
CPSF6|NM_007007|554	1916	11052	CPSF6	NM_007007	554	TAGAAGACGCACCGGGTTGTAACTCCATGCAATAAAGTTAATATTCATAGCTTTATTGCATGGAGTTACAACTTTTTTGGCAAGCAAAAGACGGCATACGAGATACGTGTGTACGTACACACTTCGCCGTCTTCGT
CPSF6|NM_007007|555	1917	11052	CPSF6	NM_007007	555	TAGAAGACGCACCGGGGTGATTATGGGAGTGTTATTGTTAATATTCATAGCAATAGCACTCCCATAATCACCTTTTTTGGCAAGCAAAAGACGGCATACGAGATCAGTGTGTACGTACACTGTTCGCCGTCTTCGT
CPSF6|NM_007007|556	1918	11052	CPSF6	NM_007007	556	TAGAAGACGCACCGGGGTGGGTATGATTAGATAGATGTTAATATTCATAGCATCTATCTGATCATGCCCACCTTTTTTGGCAAGCAAAAGACGGCATACGAGATGTGTGTGTACGTACTGGTTTCGCCGTCTTCGT
CPSF6|NM_007007|557	1919	11052	CPSF6	NM_007007	557	TAGAAGACGCACCGGAGTTCAACCAGGAAGTTGAATGTTAATATTCATAGCATTCAGCTTCCTGGTTGAACTTTTTTTGGCAAGCAAAAGACGGCATACGAGATCAGTGTGTACGTACTGCATTCGCCGTCTTCGT
CPSF6|NM_007007|558	1920	11052	CPSF6	NM_007007	558	TAGAAGACGCACCGGTGAGACACTGGTAACTGTAATGTTAATATTCATAGCATTGCAGTTACCAGTGTCTCATTTTTTGGCAAGCAAAAGACGGCATACGAGATTGGTGTGTACGTACTGACTTCGCCGTCTTCGT
CPSF6|NM_007007|559	1921	11052	CPSF6	NM_007007	559	TAGAAGACGCACCGGCGCCATTGGGTGAAGTTGAATGTTAATATTCATAGCATTCAGCTTCACTCAATGGCGTTTTTTGGCAAGCAAAAGACGGCATACGAGATACGTGTGTACGTACTGTGTTCGCCGTCTTCGT
AKR1C4|NM_001818|560	1922	1109	AKR1C4	NM_001818	560	TAGAAGACGCACCGGGAACCCAACGACATAAATTATGTTAATATTCATAGCATAGTTTATGTCGTTGGGTTCTTTTTTGGCAAGCAAAAGACGGCATACGAGATGTGTGTGTACGTTGGTGTTTCGCCGTCTTCGT
AKR1C4|NM_001818|561	1923	1109	AKR1C4	NM_001818	561	TAGAAGACGCACCGGGCTGTAGAGGTCACTAAATTAGTTAATATTCATAGCTAATTTGGTGACCTCTACAGCTTTTTTGGCAAGCAAAAGACGGCATACGAGATCAGTGTGTACGTTGGTCATTCGCCGTCTTCGT
AKR1C4|NM_001818|562	1924	1109	AKR1C4	NM_001818	562	TAGAAGACGCACCGGCGCCATATTGATTCTGTTTATGTTAATATTCATAGCATAAGCAGAATCAATATGGCGTTTTTTGGCAAGCAAAAGACGGCATACGAGATTGGTGTGTACGTTGGTACTTCGCCGTCTTCGT
AKR1C4|NM_001818|563	1925	1109	AKR1C4	NM_001818	563	TAGAAGACGCACCGGGAGCTGTAGAGGTTACTAAATGTTAATATTCATAGCATTTGGTGACCTCTACAGCTCTTTTTTGGCAAGCAAAAGACGGCATACGAGATACGTGTGTACGTTGGTTGTTCGCCGTCTTCGT
AKR1C4|NM_001818|564	1926	1109	AKR1C4	NM_001818	564	TAGAAGACGCACCGGGGACCATCCTGATTATTCATTGTTAATATTCATAGCAATGGATAATCAGGATGGTCCTTTTTTGGCAAGCAAAAGACGGCATACGAGATCAGTGTGTACGTTGCAGTTTCGCCGTCTTCGT
AKR1C4|NM_001818|565	1927	1109	AKR1C4	NM_001818	565	TAGAAGACGCACCGGGCCTTGGAAAGTTCATTGAAAGTTAATATTCATAGCTTTCAGTGAGCTTTCCAAGGCTTTTTTGGCAAGCAAAAGACGGCATACGAGATACGTGTGTACGTTGCACATTCGCCGTCTTCGT
AKR1C4|NM_001818|566	1928	1109	AKR1C4	NM_001818	566	TAGAAGACGCACCGGGATCAGAGAGAATATCTAGGTGTTAATATTCATAGCACCTGGATGTTCTCTCTGATCTTTTTTGGCAAGCAAAAGACGGCATACGAGATGTGTGTGTACGTTGCAACTTCGCCGTCTTCGT
AKR1C4|NM_001818|567	1929	1109	AKR1C4	NM_001818	567	TAGAAGACGCACCGGGCAGCGGATTAGAGAGAATATGTTAATATTCATAGCATGTTCTCTCTGATCCGCTGCTTTTTTGGCAAGCAAAAGACGGCATACGAGATTGGTGTGTACGTTGCATGTTCGCCGTCTTCGT
ADAMTS8|NM_007037|568	1930	11095	ADAMTS8	NM_007037	568	TAGAAGACGCACCGGGCAGTAGTGTGAGAAGTATAAGTTAATATTCATAGCTTATACTTCTCACACTGCTGCTTTTTTGGCAAGCAAAAGACGGCATACGAGATACGTGTGTACGTTGACGTTTCGCCGTCTTCGT
ADAMTS8|NM_007037|569	1931	11095	ADAMTS8	NM_007037	569	TAGAAGACGCACCGGACCTGCAATAAGGCTTTGAAAGTTAATATTCATAGCTTTCAGAGCCTTGTTGCAGGTTTTTTTGGCAAGCAAAAGACGGCATACGAGATTGGTGTGTACGTTGACCATTCGCCGTCTTCGT
ADAMTS8|NM_007037|570	1932	11095	ADAMTS8	NM_007037	570	TAGAAGACGCACCGGCAGCAGTGTGAGAGGTATGATGTTAATATTCATAGCATTATACTTCTCACACTGCTGTTTTTTGGCAAGCAAAAGACGGCATACGAGATCAGTGTGTACGTTGACACTTCGCCGTCTTCGT
ADAMTS8|NM_007037|571	1933	11095	ADAMTS8	NM_007037	571	TAGAAGACGCACCGGGAACCACATCCTGATGTTAATGTTAATATTCATAGCATTAACGTCAGGATGTGGTTCTTTTTTGGCAAGCAAAAGACGGCATACGAGATGTGTGTGTACGTTGACTGTTCGCCGTCTTCGT
ADAMTS8|NM_007037|572	1934	11095	ADAMTS8	NM_007037	572	TAGAAGACGCACCGGCCAGTTGGTGCCATTAATATTGTTAATATTCATAGCAATATTAGTGGCACCAGCTGGTTTTTTGGCAAGCAAAAGACGGCATACGAGATTGGTGTGTACGTTGTGGTTTCGCCGTCTTCGT
ADAMTS8|NM_007037|573	1935	11095	ADAMTS8	NM_007037	573	TAGAAGACGCACCGGAGAAACATTGGCCATTTGTGTGTTAATATTCATAGCACACAGATGGCCAGTGTTTCTTTTTTTGGCAAGCAAAAGACGGCATACGAGATGTGTGTGTACGTTGTGCATTCGCCGTCTTCGT
ADAMTS8|NM_007037|574	1936	11095	ADAMTS8	NM_007037	574	TAGAAGACGCACCGGTTAGCATGTAGAGCAGTAAAGGTTAATATTCATAGCCTTTGCTGCTCTGCATGCTAATTTTTTGGCAAGCAAAAGACGGCATACGAGATACGTGTGTACGTTGTGACTTCGCCGTCTTCGT
ADAMTS8|NM_007037|575	1937	11095	ADAMTS8	NM_007037	575	TAGAAGACGCACCGGCTCAGAATGGAGGAAGATATTGTTAATATTCATAGCAGTATCTTCCTCCATTCTGAGTTTTTTGGCAAGCAAAAGACGGCATACGAGATCAGTGTGTACGTTGTGTGTTCGCCGTCTTCGT
CHEK1|NM_001114121|576	1938	1111	CHEK1	NM_001114121	576	TAGAAGACGCACCGGCGCAGTGAAGGTTGTAGATGTGTTAATATTCATAGCATATCTACAATCTTCACTGCGTTTTTTGGCAAGCAAAAGACGGCATACGAGATACGTGTGTACCAGTGTGTTTCGCCGTCTTCGT
CHEK1|NM_001114121|577	1939	1111	CHEK1	NM_001114121	577	TAGAAGACGCACCGGGCTGTGAATAGAGTAATTGAAGTTAATATTCATAGCTTCAGTTACTCTATTCACAGCTTTTTTGGCAAGCAAAAGACGGCATACGAGATTGGTGTGTACCAGTGTCATTCGCCGTCTTCGT
CHEK1|NM_001114121|578	1940	1111	CHEK1	NM_001114121	578	TAGAAGACGCACCGGGTGGTTTATCTGTATGGTATTGTTAATATTCATAGCAATACCATGCAGATAAACCACTTTTTTGGCAAGCAAAAGACGGCATACGAGATCAGTGTGTACCAGTGTACTTCGCCGTCTTCGT
CHEK1|NM_001114121|579	1941	1111	CHEK1	NM_001114121	579	TAGAAGACGCACCGGGAAGATTAAAGGGAAGTTGATGTTAATATTCATAGCATCAGCTTCCCTTTAATCTTCTTTTTTGGCAAGCAAAAGACGGCATACGAGATGTGTGTGTACCAGTGTTGTTCGCCGTCTTCGT
CHEK1|NM_001114121|580	1942	1111	CHEK1	NM_001114121	580	TAGAAGACGCACCGGTGATATTGTGAGCAGCTAGAAGTTAATATTCATAGCTTCTGGCTGCTCACAATATCATTTTTTGGCAAGCAAAAGACGGCATACGAGATTGGTGTGTACCAGTCAGTTTCGCCGTCTTCGT
CHEK1|NM_001114121|581	1943	1111	CHEK1	NM_001114121	581	TAGAAGACGCACCGGGTAAACAGTGTTTCTAGTGAAGTTAATATTCATAGCTTCACTAGAAGCACTGTTTACTTTTTTGGCAAGCAAAAGACGGCATACGAGATGTGTGTGTACCAGTCACATTCGCCGTCTTCGT
CHEK1|NM_001114121|582	1944	1111	CHEK1	NM_001114121	582	TAGAAGACGCACCGGGACAGAATAGAGCCAGATATAGTTAATATTCATAGCTATGTCTGGCTCTATTCTGTCTTTTTTGGCAAGCAAAAGACGGCATACGAGATACGTGTGTACCAGTCAACTTCGCCGTCTTCGT
CHEK1|NM_001114121|583	1945	1111	CHEK1	NM_001114121	583	TAGAAGACGCACCGGGGGTGGTTTATTTGTATGGTAGTTAATATTCATAGCTACCATGCAGATAAACCACCCTTTTTTGGCAAGCAAAAGACGGCATACGAGATCAGTGTGTACCAGTCATGTTCGCCGTCTTCGT
CDC37|NM_007065|584	1946	11140	CDC37	NM_007065	584	TAGAAGACGCACCGGCCAGACAATCGTCATGTAATTGTTAATATTCATAGCAATTGCATGACGATTGTCTGGTTTTTTGGCAAGCAAAAGACGGCATACGAGATGTGTGTGTACCAGTACGTTTCGCCGTCTTCGT
CDC37|NM_007065|585	1947	11140	CDC37	NM_007065	585	TAGAAGACGCACCGGGACCATATTGAGGTGTTTGATGTTAATATTCATAGCATCAGACACCTCAATGTGGTCTTTTTTGGCAAGCAAAAGACGGCATACGAGATCAGTGTGTACCAGTACCATTCGCCGTCTTCGT
CDC37|NM_007065|586	1948	11140	CDC37	NM_007065	586	TAGAAGACGCACCGGGACCCATTATTGGAAGTTGTTGTTAATATTCATAGCAACAGCTTCCAGTAATGGGTCTTTTTTGGCAAGCAAAAGACGGCATACGAGATTGGTGTGTACCAGTACACTTCGCCGTCTTCGT
CDC37|NM_007065|587	1949	11140	CDC37	NM_007065	587	TAGAAGACGCACCGGAGATGCGTAAGAAGGAGAAGGGTTAATATTCATAGCTCTTCTCCTTCTTGCGCATCTTTTTTTGGCAAGCAAAAGACGGCATACGAGATACGTGTGTACCAGTACTGTTCGCCGTCTTCGT
CDC37|NM_007065|588	1950	11140	CDC37	NM_007065	588	TAGAAGACGCACCGGACCTAGGGGTGGAGGAGAGATGTTAATATTCATAGCATTTCTCCTCCACCTCTAGGTTTTTTTGGCAAGCAAAAGACGGCATACGAGATCAGTGTGTACCAGTTGGTTTCGCCGTCTTCGT
CDC37|NM_007065|589	1951	11140	CDC37	NM_007065	589	TAGAAGACGCACCGGCTAGGGGTGGAGGAGAAGTGTGTTAATATTCATAGCACATTTCTCCTCCACCTCTAGTTTTTTGGCAAGCAAAAGACGGCATACGAGATACGTGTGTACCAGTTGCATTCGCCGTCTTCGT
CDC37|NM_007065|590	1952	11140	CDC37	NM_007065	590	TAGAAGACGCACCGGACAGCCAATTACCTGGTTATTGTTAATATTCATAGCAATGACCAGGTAATTGGCTGTTTTTTTGGCAAGCAAAAGACGGCATACGAGATGTGTGTGTACCAGTTGACTTCGCCGTCTTCGT
CDC37|NM_007065|591	1953	11140	CDC37	NM_007065	591	TAGAAGACGCACCGGTCAGCAAGAGTATGGTAAATAGTTAATATTCATAGCTATTTACCATGCTCTTGCTGATTTTTTGGCAAGCAAAAGACGGCATACGAGATTGGTGTGTACCAGTTGTGTTCGCCGTCTTCGT
MAP4K5|NM_006575|592	1954	11183	MAP4K5	NM_006575	592	TAGAAGACGCACCGGGCTCTACTCTCATAATCTTATGTTAATATTCATAGCATAAGATTGTGAGAGTAGAGCTTTTTTGGCAAGCAAAAGACGGCATACGAGATCAGTGTGTACCACAGTGTTTCGCCGTCTTCGT
MAP4K5|NM_006575|593	1955	11183	MAP4K5	NM_006575	593	TAGAAGACGCACCGGCAAAGTGAACAATCCAGATAAGTTAATATTCATAGCTTATCTGGATTGTTCACTTTGTTTTTTGGCAAGCAAAAGACGGCATACGAGATACGTGTGTACCACAGTCATTCGCCGTCTTCGT
MAP4K5|NM_006575|594	1956	11183	MAP4K5	NM_006575	594	TAGAAGACGCACCGGCTCTATATCTTGGCTGGATATGTTAATATTCATAGCATGTCCAGCCAAGATGTAGAGTTTTTTGGCAAGCAAAAGACGGCATACGAGATGTGTGTGTACCACAGTACTTCGCCGTCTTCGT
MAP4K5|NM_006575|595	1957	11183	MAP4K5	NM_006575	595	TAGAAGACGCACCGGCTTGCCTATTTGCATACTAAAGTTAATATTCATAGCTTTAGTATGCAAATAGGCAAGTTTTTTGGCAAGCAAAAGACGGCATACGAGATTGGTGTGTACCACAGTTGTTCGCCGTCTTCGT
MAP4K5|NM_006575|596	1958	11183	MAP4K5	NM_006575	596	TAGAAGACGCACCGGCAGGATTAGCTGCCTATATTTGTTAATATTCATAGCGAATATGGGCAGCTAATCCTGTTTTTTGGCAAGCAAAAGACGGCATACGAGATACGTGTGTACCACACAGTTTCGCCGTCTTCGT
MAP4K5|NM_006575|597	1959	11183	MAP4K5	NM_006575	597	TAGAAGACGCACCGGGACGTCTATAAGGCTAGAAATGTTAATATTCATAGCATTTCTGGCCTTATAGACGTCTTTTTTGGCAAGCAAAAGACGGCATACGAGATTGGTGTGTACCACACACATTCGCCGTCTTCGT
MAP4K5|NM_006575|598	1960	11183	MAP4K5	NM_006575	598	TAGAAGACGCACCGGGTAACATCGTTGCTTACTTTGGTTAATATTCATAGCCAAAGTAGGCAACGATGTTACTTTTTTGGCAAGCAAAAGACGGCATACGAGATCAGTGTGTACCACACAACTTCGCCGTCTTCGT
MAP4K5|NM_006575|599	1961	11183	MAP4K5	NM_006575	599	TAGAAGACGCACCGGGACAGATCATGGTGATGTAAAGTTAATATTCATAGCTTTACATCGCCATGGTCTGTCTTTTTTGGCAAGCAAAAGACGGCATACGAGATGTGTGTGTACCACACATGTTCGCCGTCTTCGT
CHEK2|NM_001005735|600	1962	11200	CHEK2	NM_001005735	600	TAGAAGACGCACCGGGAACAGATAAATACCGAACATGTTAATATTCATAGCATGTTCGGTATTTATCTGTTCTTTTTTGGCAAGCAAAAGACGGCATACGAGATTGGTGTGTACCACAACGTTTCGCCGTCTTCGT
CHEK2|NM_001005735|601	1963	11200	CHEK2	NM_001005735	601	TAGAAGACGCACCGGTACATAGAAGATCATAGTGGCGTTAATATTCATAGCGCCACTGTGATCTTCTATGTATTTTTTGGCAAGCAAAAGACGGCATACGAGATGTGTGTGTACCACAACCATTCGCCGTCTTCGT
CHEK2|NM_001005735|602	1964	11200	CHEK2	NM_001005735	602	TAGAAGACGCACCGGTGTAAGAAAGTAGCCATAAAGGTTAATATTCATAGCCTTTATGGCTACTTTCTTACATTTTTTGGCAAGCAAAAGACGGCATACGAGATACGTGTGTACCACAACACTTCGCCGTCTTCGT
CHEK2|NM_001005735|603	1965	11200	CHEK2	NM_001005735	603	TAGAAGACGCACCGGACGATGCCAAATTCCAGCTAGGTTAATATTCATAGCCTGGCTGGAGTTTGGCATCGTTTTTTTGGCAAGCAAAAGACGGCATACGAGATCAGTGTGTACCACAACTGTTCGCCGTCTTCGT
CHEK2|NM_001005735|604	1966	11200	CHEK2	NM_001005735	604	TAGAAGACGCACCGGCGCCGTCCTTTGAATAATAATGTTAATATTCATAGCATTGTTATTCAAAGGACGGCGTTTTTTGGCAAGCAAAAGACGGCATACGAGATGTGTGTGTACCACATGGTTTCGCCGTCTTCGT
CHEK2|NM_001005735|605	1967	11200	CHEK2	NM_001005735	605	TAGAAGACGCACCGGGCTCTCAATGTTGAAATAGAAGTTAATATTCATAGCTTCTGTTTCAACATTGAGAGCTTTTTTGGCAAGCAAAAGACGGCATACGAGATCAGTGTGTACCACATGCATTCGCCGTCTTCGT
CHEK2|NM_001005735|606	1968	11200	CHEK2	NM_001005735	606	TAGAAGACGCACCGGCCTTGCATCATCAAGATTAAAGTTAATATTCATAGCTTTAATCTTGATGATGCAAGGTTTTTTGGCAAGCAAAAGACGGCATACGAGATTGGTGTGTACCACATGACTTCGCCGTCTTCGT
CHEK2|NM_001005735|607	1969	11200	CHEK2	NM_001005735	607	TAGAAGACGCACCGGGAAGCTACCTGTAAGCTTTATGTTAATATTCATAGCATAGAGCTTGCAGGTAGCTTCTTTTTTGGCAAGCAAAAGACGGCATACGAGATACGTGTGTACCACATGTGTTCGCCGTCTTCGT
AKAP13|NM_006738|608	1970	11214	AKAP13	NM_006738	608	TAGAAGACGCACCGGCGGAATTAGATAGTGGCTTAAGTTAATATTCATAGCTTAGGCCACTATCTGATTCCGTTTTTTGGCAAGCAAAAGACGGCATACGAGATGTGTGTGTACCAACGTGTTTCGCCGTCTTCGT
AKAP13|NM_006738|609	1971	11214	AKAP13	NM_006738	609	TAGAAGACGCACCGGGCTGAAGGTGATGTGGTGTTTGTTAATATTCATAGCAAACACTACATCATCTTCAGCTTTTTTGGCAAGCAAAAGACGGCATACGAGATCAGTGTGTACCAACGTCATTCGCCGTCTTCGT
AKAP13|NM_006738|610	1972	11214	AKAP13	NM_006738	610	TAGAAGACGCACCGGGCAGTTCTTCTCACTGATATTGTTAATATTCATAGCAATGTCAGTGAGAAGAACTGCTTTTTTGGCAAGCAAAAGACGGCATACGAGATTGGTGTGTACCAACGTACTTCGCCGTCTTCGT
AKAP13|NM_006738|611	1973	11214	AKAP13	NM_006738	611	TAGAAGACGCACCGGCCTCACCCATTTGTTCTATAAGTTAATATTCATAGCTTGTAGAACAAATGGGTGAGGTTTTTTGGCAAGCAAAAGACGGCATACGAGATACGTGTGTACCAACGTTGTTCGCCGTCTTCGT
AKAP13|NM_006738|612	1974	11214	AKAP13	NM_006738	612	TAGAAGACGCACCGGTGAGAATGCAGAACGTTTAAAGTTAATATTCATAGCTTTAAACGTTCTGCATTCTCATTTTTTGGCAAGCAAAAGACGGCATACGAGATCAGTGTGTACCAACCAGTTTCGCCGTCTTCGT
AKAP13|NM_006738|613	1975	11214	AKAP13	NM_006738	613	TAGAAGACGCACCGGGAGTCTTGGAGTTGGATAATAGTTAATATTCATAGCTATTATCCGACTCCAAGACTCTTTTTTGGCAAGCAAAAGACGGCATACGAGATACGTGTGTACCAACCACATTCGCCGTCTTCGT
AKAP13|NM_006738|614	1976	11214	AKAP13	NM_006738	614	TAGAAGACGCACCGGCCCAATGATCCAGGTGATAAAGTTAATATTCATAGCTTTATCGCCTGGGTCATTGGGTTTTTTGGCAAGCAAAAGACGGCATACGAGATGTGTGTGTACCAACCAACTTCGCCGTCTTCGT
AKAP13|NM_006738|615	1977	11214	AKAP13	NM_006738	615	TAGAAGACGCACCGGGATGCTCCAGTAGATTAGAATGTTAATATTCATAGCATTCTGATCTACTGGAGCATCTTTTTTGGCAAGCAAAAGACGGCATACGAGATTGGTGTGTACCAACCATGTTCGCCGTCTTCGT
DDX20|NM_007204|616	1978	11218	DDX20	NM_007204	616	TAGAAGACGCACCGGCCGCTTCTCATTCATATTATTGTTAATATTCATAGCAATAATATGAATGAGAAGCGGTTTTTTGGCAAGCAAAAGACGGCATACGAGATACGTGTGTACCAACACGTTTCGCCGTCTTCGT
DDX20|NM_007204|617	1979	11218	DDX20	NM_007204	617	TAGAAGACGCACCGGTCAGCTACTTATCCTGAATTTGTTAATATTCATAGCAAATTCGGGATAAGTAGCTGATTTTTTGGCAAGCAAAAGACGGCATACGAGATTGGTGTGTACCAACACCATTCGCCGTCTTCGT
DDX20|NM_007204|618	1980	11218	DDX20	NM_007204	618	TAGAAGACGCACCGGCTGAATTGGTAGGGGATTGTGGTTAATATTCATAGCCATAATCCTCTACCAATTCAGTTTTTTGGCAAGCAAAAGACGGCATACGAGATCAGTGTGTACCAACACACTTCGCCGTCTTCGT
DDX20|NM_007204|619	1981	11218	DDX20	NM_007204	619	TAGAAGACGCACCGGACGCTTGTGGATGATTGTATTGTTAATATTCATAGCAATACGATCATCCACAGGCGTTTTTTTGGCAAGCAAAAGACGGCATACGAGATGTGTGTGTACCAACACTGTTCGCCGTCTTCGT
DDX20|NM_007204|620	1982	11218	DDX20	NM_007204	620	TAGAAGACGCACCGGCTTGGCTCCTATAAGAGAAATGTTAATATTCATAGCATTTCTCTTGTAGGAGCCAAGTTTTTTGGCAAGCAAAAGACGGCATACGAGATTGGTGTGTACCAACTGGTTTCGCCGTCTTCGT
DDX20|NM_007204|621	1983	11218	DDX20	NM_007204	621	TAGAAGACGCACCGGGAAGCACTTTCATTGTAGAGTGTTAATATTCATAGCACTCTGCAATGAAAGTGCTTCTTTTTTGGCAAGCAAAAGACGGCATACGAGATGTGTGTGTACCAACTGCATTCGCCGTCTTCGT
DDX20|NM_007204|622	1984	11218	DDX20	NM_007204	622	TAGAAGACGCACCGGCTTGCCTGCTAGTAAATAGATGTTAATATTCATAGCATCTGTTTACTGGCAGGCAAGTTTTTTGGCAAGCAAAAGACGGCATACGAGATACGTGTGTACCAACTGACTTCGCCGTCTTCGT
DDX20|NM_007204|623	1985	11218	DDX20	NM_007204	623	TAGAAGACGCACCGGATTGATGTTGAGAAGGTGAATGTTAATATTCATAGCATTCACCTTCTCAGCATCAATTTTTTTGGCAAGCAAAAGACGGCATACGAGATCAGTGTGTACCAACTGTGTTCGCCGTCTTCGT
DUSP12|NM_007240|624	1986	11266	DUSP12	NM_007240	624	TAGAAGACGCACCGGAGTGGATACCTCTAGTGTAATGTTAATATTCATAGCATTGCACTAGAGGTATCCACTTTTTTTGGCAAGCAAAAGACGGCATACGAGATTGGTGTGTACCATGGTGTTTCGCCGTCTTCGT
DUSP12|NM_007240|625	1987	11266	DUSP12	NM_007240	625	TAGAAGACGCACCGGTCAGTTGAAGTGTGGCTATAAGTTAATATTCATAGCTTATGGCCACACTTCGACTGATTTTTTGGCAAGCAAAAGACGGCATACGAGATGTGTGTGTACCATGGTCATTCGCCGTCTTCGT
DUSP12|NM_007240|626	1988	11266	DUSP12	NM_007240	626	TAGAAGACGCACCGGGTCGAAGTGTGGCTATAATAAGTTAATATTCATAGCTTATTATGGCCACACTTCGACTTTTTTGGCAAGCAAAAGACGGCATACGAGATACGTGTGTACCATGGTACTTCGCCGTCTTCGT
DUSP12|NM_007240|627	1989	11266	DUSP12	NM_007240	627	TAGAAGACGCACCGGGTGGATACCTCTAGTGTAATTGTTAATATTCATAGCAATTGCACTAGAGGTATCCACTTTTTTGGCAAGCAAAAGACGGCATACGAGATCAGTGTGTACCATGGTTGTTCGCCGTCTTCGT
DUSP12|NM_007240|628	1990	11266	DUSP12	NM_007240	628	TAGAAGACGCACCGGAAACCAGAGGTTAAGATGAATGTTAATATTCATAGCATTCATCTTAGCCTCTGGTTTTTTTTTGGCAAGCAAAAGACGGCATACGAGATGTGTGTGTACCATGCAGTTTCGCCGTCTTCGT
DUSP12|NM_007240|629	1991	11266	DUSP12	NM_007240	629	TAGAAGACGCACCGGCAGTTGAAGTGTGGCTATAATGTTAATATTCATAGCATTATGGCCACACTTCGACTGTTTTTTGGCAAGCAAAAGACGGCATACGAGATCAGTGTGTACCATGCACATTCGCCGTCTTCGT
DUSP12|NM_007240|630	1992	11266	DUSP12	NM_007240	630	TAGAAGACGCACCGGGGTTTGAGTGGCAATTGAAATGTTAATATTCATAGCATTTCAGTTGCCACTCAAACCTTTTTTGGCAAGCAAAAGACGGCATACGAGATTGGTGTGTACCATGCAACTTCGCCGTCTTCGT
DUSP12|NM_007240|631	1993	11266	DUSP12	NM_007240	631	TAGAAGACGCACCGGGCTTTGTTGGGAGTGGTGGGTGTTAATATTCATAGCATCCATCACTCCCAACAAAGCTTTTTTGGCAAGCAAAAGACGGCATACGAGATACGTGTGTACCATGCATGTTCGCCGTCTTCGT
GABARAPL2|NM_007285|632	1994	11345	GABARAPL2	NM_007285	632	TAGAAGACGCACCGGCGCGAAGATTTGAGTGAAATAGTTAATATTCATAGCTATTTCGCTCGAATCTTCGCGTTTTTTGGCAAGCAAAAGACGGCATACGAGATCAGTGTGTACCATGACGTTTCGCCGTCTTCGT
GABARAPL2|NM_007285|633	1995	11345	GABARAPL2	NM_007285	633	TAGAAGACGCACCGGCCTAACTATGGGATAGCTTTAGTTAATATTCATAGCTAAAGCTGTCCCATAGTTAGGTTTTTTGGCAAGCAAAAGACGGCATACGAGATACGTGTGTACCATGACCATTCGCCGTCTTCGT
GABARAPL2|NM_007285|634	1996	11345	GABARAPL2	NM_007285	634	TAGAAGACGCACCGGGCGATCTTCTTGTTTGTGGGTGTTAATATTCATAGCATCCACAAACAGGAAGATCGCTTTTTTGGCAAGCAAAAGACGGCATACGAGATGTGTGTGTACCATGACACTTCGCCGTCTTCGT
GABARAPL2|NM_007285|635	1997	11345	GABARAPL2	NM_007285	635	TAGAAGACGCACCGGGACAGCTTTATGAGAAGGAAAGTTAATATTCATAGCTTTCCTTCTCGTAAAGCTGTCTTTTTTGGCAAGCAAAAGACGGCATACGAGATTGGTGTGTACCATGACTGTTCGCCGTCTTCGT
GABARAPL2|NM_007285|636	1998	11345	GABARAPL2	NM_007285	636	TAGAAGACGCACCGGAGGCTCTCAGATTGTTGATATGTTAATATTCATAGCATGTCAACAATCTGAGAGCCTTTTTTTGGCAAGCAAAAGACGGCATACGAGATACGTGTGTACCATGTGGTTTCGCCGTCTTCGT
[truncated: 8,781 more rows]
