# Supplementary material for: SIRT5 Is a Druggable Metabolic Vulnerability in Acute Myeloid Leukemia
Source: Oxford University Press journal article supplement (doi:10.1158/2643-3230.bcd-20-0168), 2021-04-10
Supplement: 26433230bcd200168-sup-251721_2_supp_6933112_q6shq2.xlsx [file 26433230bcd200168-sup-251721_2_supp_6933112_q6shq2.xlsx]

## Sheet: Table S6
Table S6. Oligonucleotide sequences.
Type	Purpose	Details	Name	Sequence (5'-3')
guide RNA	CRISPR SIRT5	Santa Cruz Biotechnology product: sc-416994	Lenti-CRISPR-v2-ZsGreen1-SIRT5-A	CATCGATGAGCTGCACCGCA
guide RNA	CRISPR SIRT5	Santa Cruz Biotechnology product: sc-416994	Lenti-CRISPR-v2-ZsGreen1-SIRT5-B	GTTCCGACCTTCAGAGGAGC
guide RNA	CRISPR SIRT5	Santa Cruz Biotechnology product: sc-416994	Lenti-CRISPR-v2-ZsGreen1-SIRT5-C	AAGCACATAGTCATCATCTC
guide RNA	CRISPR non-targeting control	Santa Cruz Biotechnology product: sc-416994	Lenti-CRISPR-v2-ZsGreen1-nontarget	TGACATCAATTATTATACAT
shRNA	Knockdown of SIRT5, targets CDS	pRSIT16-U6Tet-shSIRT5-HTS6-CMV-TetRep-2A-TagRFP-2A-Puro	shSIRT5#1 (2311)	GCGTGCCAGTGGCTGAATTTA
shRNA	Knockdown of SIRT5, targets CDS	pRSIT16-U6Tet-shSIRT5-HTS6-CMV-TetRep-2A-TagRFP-2A-Puro	shSIRT5#2 (2312)	GCTGGTGTTAGTGCAGAAAGT
shRNA	Knockdown of SIRT5, targets CDS	pRSIT16-U6Tet-shSIRT5-HTS6-CMV-TetRep-2A-TagRFP-2A-Puro	shSIRT5-546	CGTCCACACGAAACCAGATTT
shRNA	Knockdown of SIRT5, targets 3'UTR	pRSIT16-U6Tet-shSIRT5-HTS6-CMV-TetRep-2A-TagRFP-2A-Puro	shSIRT5-3'UTR	CTGAGTACTGAACAATCTAAA
Oligonucleotide	Real-Time qPCR	Amplification of SIRT5, all isoforms	primer F156	CGTGGTCATCACCCAGAACA
Oligonucleotide	Real-Time qPCR	Amplification of SIRT5, all isoforms	primer R270	AGCCACAACTCCACAAGAGG
Oligonucleotide	Real-Time qPCR	ND1, quantification of mitochondrial DNA copy number	ND1-F	CCCTAAAACCCGCCACATCT
Oligonucleotide	Real-Time qPCR	ND1, quantification of mitochondrial DNA copy number	ND1-R	GAGCGATGGTGAGAGCTAAGGT
Oligonucleotide	Real-Time qPCR	HGB, quantification of mitochondrial DNA copy number	HGB-F	GTGCACCTGACTCCTGAGGAGA
Oligonucleotide	Real-Time qPCR	HGB, quantification of mitochondrial DNA copy number	HGB-R	CCTTGATACCAACCTGCCCAG
Sirt1 Taqman assay	Real-Time qPCR	Life Technologies	Hs01009005_m1	proprietary
Sirt2 Taqman assay	Real-Time qPCR	Life Technologies	Hs00247263_m1	proprietary
Sirt3 Taqman assay	Real-Time qPCR	Life Technologies	Hs00953477_m1	proprietary
Sirt4 Taqman assay	Real-Time qPCR	Life Technologies	Hs00202033_m1	proprietary
Sirt5 Taqman assay	Real-Time qPCR	Life Technologies	Hs00978335_m1	proprietary
Sirt6 Taqman assay	Real-Time qPCR	Life Technologies	Hs00966002_m1	proprietary
Sirt7 Taqman assay	Real-Time qPCR	Life Technologies	Hs01034735_m1	proprietary
