# Supplementary material for: SIRT5 Is a Druggable Metabolic Vulnerability in Acute Myeloid Leukemia
Source: Oxford University Press journal article supplement (doi:10.1158/2643-3230.bcd-20-0168), 2021-04-10
Supplement: 26433230bcd200168-sup-251721_2_supp_6933113_qtshq2.xlsx [file 26433230bcd200168-sup-251721_2_supp_6933113_qtshq2.xlsx]

## Sheet: Table S7
Table S7. Antibodies.
Protein	Clone	Company	Catalog	Species/Fluorphore	Technique	Research Resource Identifier
SIRT5	D5E11	Cell Signaling Technology	8779	Rabbit	Immunoblot	AB_279766
α/β-Tubulin	polyclonal	Cell Signaling Technology	2148	Rabbit	Immunoblot	AB_2288042
β-Actin	D6A8	Cell Signaling Technology	8457	Rabbit	Immunoblot	AB_10950489
Succinyl-lysine	3D3	PTM BIO	PTM-419	Mouse	Immunoblot
Malonyl-lysine	polyclonal	PTM BIO	PTM-901	Rabbit	Immunoblot	AB_2687947
Glutaryl-lysine	polyclonal	PTM BIO	PTM-1151	Rabbit	Immunoblot
SOD2	polyclonal	abcam	ab13533	Rabbit	Immunoblot	AB_300434
SOD1	71G8	Cell Signaling Technology	4266S	Mouse	Immunoblot	AB_2193898
SOD1 Su-K122	polyclonal	Mol Cell Biol. 2017 Oct 15; 37(20): e00354-17	none	Rabbit	Immunoblot
mouse IgG	polyclonal	Li-Cor	926-68022	IRDye 680LT	Immunoblot	AB_10715072
rabbit IgG	polyclonal	Li-Cor	926-32213	IRDye 800CW	Immunoblot	AB_621848
CD11b	M1/70	Invitrogen	11-0112-82	FITC	FACS, differentiation	AB_464935
CD14	HCD114	BioLegend	325628	BV421	FACS, differentiation	AB_2563296
CD16	3G8	BioLegend	302060	APC/Fire 750	FACS, differentiation	AB_2616707
CD34	4H11	eBioscience	17-0349-42	APC	FACS, differentiation	AB_2016672
CD16/32	93	ThermoFisher	56-0161-80	Alexa Fluor 700	FACS, phenotyping	AB_493995
CD117	ACK2	ThermoFisher	45-1351-80	APC	FACS, phenotyping
CD34	RAM34	ThermoFisher	11-0341-81	FITC	FACS, phenotyping	AB_465020
CD135	A2F10	ThermoFisher	45-1351-80	PerCP-eFluor710	FACS, phenotyping
lineage	multiple	BD Biosciences	51-9006957	V450	FACS, phenotyping
Sca-1	D7	ThermoFisher	A18486	PE	FACS, phenotyping	AB_2535332
Human CD45	H130	Tonbo	20-0459-T500	APC	FACS, phenotyping
Mouse CD45	30-F11	Tonbo	35-0451-U100	FITC	FACS, phenotyping
